# Supplementary material for: Ets homologous factor regulates pathways controlling response to injury in airway epithelial cells
Source: PubMed Central journal article supplement — Nucleic Acids Res. 2014 Nov 20;42(22):13588–98. doi: 10.1093/nar/gku1146 (PMC4267623; doi:10.1093/nar/gku1146), 2014-11-20
Supplement: supp_gku1146_Fossum_Supplemental_data_12_11_2-14.pdf [file supp_gku1146_Fossum_Supplemental_data_12_11_2-14.pdf]

## Supplementary Figures.

**Figure S1.** Validation of EHF antibody for ChIP-seq. An antibody against EHF (Clone 5A.5, Thermo Scientific) was tested for specificity. Calu-3 cells were treated with either negative control (NC) or EHF targeted siRNA. Cell lysates were run on western blot and probed with the EHF antibody. A specific band was detected at 35kDa that decreased in intensity in the knockdown sample.

**Figure S2.** Principle Component Analysis (PCA) plot of individual samples based on gene expression FPKM values. Whole transcriptome expression values in FPKM at gene level were used to compare similarity among the samples through dimension reduction analysis of PCA. The top 3 Principle Components (PCs) that explain the largest variability of the data were plotted on a 3D plot, with different treatment groups represented by different colors (negative control samples in blue, EHF siRNA-treated samples in red). Samples from different treatment groups are segregated along PC#2, which explains 14.5% of all variability in the data.

**Figure S3.** Plot of the average distance between differentially expressed genes following EHF depletion and the nearest EHF ChIP-seq peak. The average distance between differentially expressed genes and the nearest EHF ChIP-seq peak is not significantly different between genes that decreased (2,930kb) and genes that increased (2,524kb) in expression.

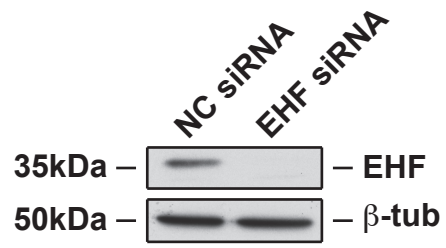

**Figure 1**

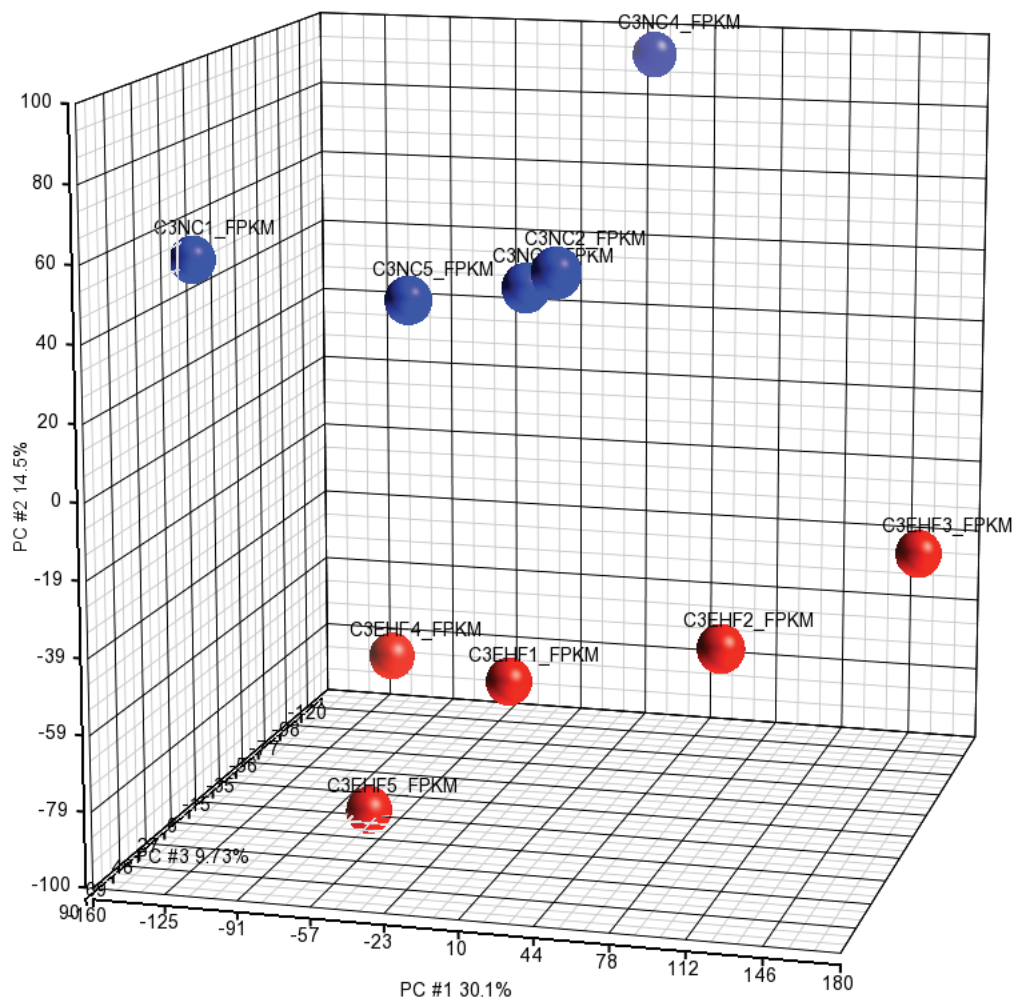

Figure 2

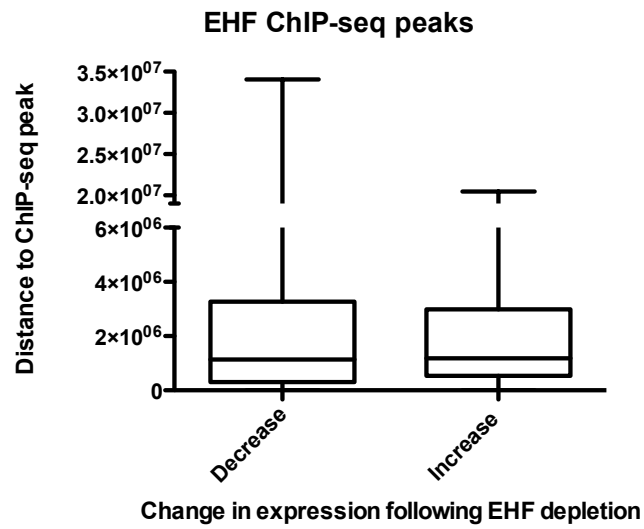

**Figure 3**

| Table S1. Sequencing and alignment data for ChIP-seq experiments. |                |                |                          |
|-------------------------------------------------------------------|----------------|----------------|--------------------------|
| Experiment                                                        | Sequence Reads | Reads Aligned* | Percentage Reads Aligned |
| Calu-3 Input (Used for EHF ChIP-seq)                              | 24147887       | 18849149       | 78.06                    |
| EHF ChIP-seq Replicate #1                                         | 14000252       | 10176290       | 72.69                    |
| EHF ChIP-seq Replicate #2                                         | 12203275       | 8418631        | 68.99                    |
| Calu-3 Input (Used for histone modification)                      | 41720748       | 33082311       | 79.29                    |
| H3K4me1 ChIP-seq                                                  | 15953914       | 12989646       | 81.41                    |
| H3K27ac ChIP-seq                                                  | 25999778       | 21426939       | 82.41                    |

\*Sequence reads with >1 possible alignment were not aligned.

Table S2. Primer sequences.

|                          | <b>Sequence</b>              |
|--------------------------|------------------------------|
| <b>qRT-PCR</b>           |                              |
| β-2 Microglobulin F      | CTCTCTCTTTCTGGCCTGGAG        |
| β-2 Microglobulin R      | TCTGCTGGATGACGTGAGTA         |
| DDAH1 F                  | TGCAACTTTAGATGGCGGAGA        |
| DDAH1 R                  | GCCAAGATTTTCAGCACCTCG        |
| IL8 F                    | AGCTGGCCGTGGCTCTCT           |
| IL8 R                    | CTGACATCTAAGTTCTTTAGCACTCCTT |
| CXCL1 F                  | CTTGCCTCAATCCTGCATC          |
| CXCL1 R                  | CCTTCTGGTCAGTTGGATTTG        |
| JDP2 F                   | TGGAGGTGAAACTGGGCAAG         |
| JDP2 R                   | ACTTTGTTCTTCTCCCGGCG         |
| TJP1 F                   | AGAGACAAGATGTCCGCCAG         |
| TJP1 R                   | CAAATCCAAATCCAGGAGCCC        |
| TJP2 F                   | GTGTCCGGAGGCAGAGACAA         |
| TJP2 R                   | TGCCATTGACCATGACCACTC        |
| ITGA2 F                  | TTGGAACGGGACTTTCGCAT         |
| ITGA2 R                  | TCGGCTTTCTCATCAGGTTTCA       |
| <b>ChIP</b>              |                              |
| Promoter (ITGA2) F       | GAAGTGTCTGCCTCCCAA           |
| Promoter (ITGA2) R       | AAGTCAGCCAGTTTCAGGG          |
| Promoter (OAS3) F        | GGCTGGAAGCAAGGAGATGA         |
| Promoter (OAS3) R        | GACCTGACACCCACTTCCTG         |
| Intron (TJP2) F          | CCTGGTTTCTGCGTTACCCT         |
| Intron (TJP2) R          | AGCATGTGCATCCTCACCAA         |
| Intron (AGAP1) F         | CTGTTTGCTGAGGGTGGACT         |
| Intron (AGAP1) R         | GAGGGAATGACTGTGGCTCC         |
| Intergenic (JDP2) F      | CCAGCTTCCTTGTTGTTGGC         |
| Intergenic (JDP2) R      | CCACCCTAGCATGTTCCCAG         |
| Intergenic (PLCH1) F     | AGTAACTCACTGACGCTGGC         |
| Intergenic (PLCH1) R     | GCCTCTTCTCTGTGGCTG           |
| Negative Control (EHF) F | TCCTTCCAGGTTTTGGCTCC         |
| Negative Control (EHF) R | GCCCCAGATCAGGAGAGAGA         |

| Table S3. List of EHF binding sites identified by ChIP-seq and present in both biological replicates. |           |           |                                       |
|-------------------------------------------------------------------------------------------------------|-----------|-----------|---------------------------------------|
| Chromosome                                                                                            | Start     | End       | Peak Location Type                    |
| chr1                                                                                                  | 15417025  | 15417149  | intron (NM_201628, intron 8 of 14)    |
| chr1                                                                                                  | 17846600  | 17846724  | Intergenic                            |
| chr1                                                                                                  | 21861388  | 21861512  | intron (NM_001127501, intron 1 of 10) |
| chr1                                                                                                  | 23076848  | 23076972  | intron (NM_017449, intron 1 of 15)    |
| chr1                                                                                                  | 31449138  | 31449262  | intron (NM_014676, intron 9 of 21)    |
| chr1                                                                                                  | 31944644  | 31944768  | Intergenic                            |
| chr1                                                                                                  | 32787504  | 32787628  | intron (NM_004964, intron 3 of 13)    |
| chr1                                                                                                  | 33446842  | 33446966  | Intergenic                            |
| chr1                                                                                                  | 35667802  | 35667926  | Intergenic                            |
| chr1                                                                                                  | 39864448  | 39864572  | intron (NM_012090, intron 54 of 94)   |
| chr1                                                                                                  | 43397556  | 43397680  | intron (NM_006516, intron 2 of 9)     |
| chr1                                                                                                  | 43637914  | 43638038  | promoter-TSS (NM_001167965)           |
| chr1                                                                                                  | 47789642  | 47789766  | Intergenic                            |
| chr1                                                                                                  | 51086753  | 51086877  | intron (NM_007051, intron 8 of 18)    |
| chr1                                                                                                  | 52499386  | 52499510  | promoter-TSS (NM_138417)              |
| chr1                                                                                                  | 53480556  | 53480680  | promoter-TSS (NM_001007100)           |
| chr1                                                                                                  | 61038890  | 61039014  | Intergenic                            |
| chr1                                                                                                  | 62190814  | 62190938  | 5' UTR (NM_032027, exon 1 of 7)       |
| chr1                                                                                                  | 64386216  | 64386340  | intron (NM_001083592, intron 1 of 6)  |
| chr1                                                                                                  | 64637566  | 64637690  | intron (NM_005012, intron 8 of 8)     |
| chr1                                                                                                  | 65574145  | 65574269  | Intergenic                            |
| chr1                                                                                                  | 65643175  | 65643299  | intron (NM_203464, intron 2 of 5)     |
| chr1                                                                                                  | 74059155  | 74059279  | Intergenic                            |
| chr1                                                                                                  | 84609841  | 84609965  | promoter-TSS (NM_182948)              |
| chr1                                                                                                  | 94167319  | 94167443  | intron (NM_001261408, intron 3 of 13) |
| chr1                                                                                                  | 95479610  | 95479734  | intron (NM_144988, intron 3 of 3)     |
| chr1                                                                                                  | 109189604 | 109189728 | Intergenic                            |
| chr1                                                                                                  | 110778428 | 110778552 | Intergenic                            |
| chr1                                                                                                  | 146987397 | 146987521 | non-coding (NR_038423, exon 2 of 4)   |
| chr1                                                                                                  | 147149057 | 147149181 | Intergenic                            |
| chr1                                                                                                  | 156186486 | 156186610 | intron (NM_001199664, intron 1 of 4)  |
| chr1                                                                                                  | 156571220 | 156571344 | promoter-TSS (NM_015590)              |
| chr1                                                                                                  | 157652618 | 157652742 | intron (NM_052939, intron 11 of 14)   |
| chr1                                                                                                  | 157850562 | 157850686 | Intergenic                            |
| chr1                                                                                                  | 160576993 | 160577117 | Intergenic                            |
| chr1                                                                                                  | 162199994 | 162200118 | intron (NM_014697, intron 2 of 9)     |
| chr1                                                                                                  | 165738048 | 165738172 | promoter-TSS (NM_019026)              |
| chr1                                                                                                  | 169085463 | 169085587 | intron (NM_001677, intron 2 of 5)     |
| chr1                                                                                                  | 173683937 | 173684061 | promoter-TSS (NM_014458)              |
| chr1                                                                                                  | 173992859 | 173992983 | Intergenic                            |
| chr1                                                                                                  | 182942192 | 182942316 | Intergenic                            |
| chr1                                                                                                  | 183668898 | 183669022 | intron (NM_015149, intron 1 of 18)    |

|      |           |           |                                        |
|------|-----------|-----------|----------------------------------------|
| chr1 | 201521097 | 201521221 | Intergenic                             |
| chr1 | 203595736 | 203595860 | promoter-TSS (NM_001684)               |
| chr1 | 204195582 | 204195706 | intron (NM_014935, intron 21 of 22)    |
| chr1 | 207126615 | 207126739 | Intergenic                             |
| chr1 | 209822803 | 209822927 | intron (NM_001017402, intron 2 of 21)  |
| chr1 | 215287612 | 215287736 | intron (NM_001017424, intron 2 of 6)   |
| chr1 | 217202666 | 217202790 | intron (NM_001243507, intron 1 of 7)   |
| chr1 | 218847942 | 218848066 | Intergenic                             |
| chr1 | 219121920 | 219122044 | Intergenic                             |
| chr1 | 223895019 | 223895143 | intron (NM_001146068, intron 1 of 20)  |
| chr1 | 224253273 | 224253397 | Intergenic                             |
| chr1 | 225632718 | 225632842 | Intergenic                             |
| chr1 | 228353717 | 228353841 | exon (NM_001010867, exon 1 of 3)       |
| chr1 | 229076833 | 229076957 | Intergenic                             |
| chr1 | 230707974 | 230708098 | Intergenic                             |
| chr1 | 234908271 | 234908395 | Intergenic                             |
| chr1 | 235099075 | 235099199 | Intergenic                             |
| chr1 | 243894751 | 243894875 | intron (NM_001206729, intron 2 of 13)  |
| chr1 | 244466195 | 244466319 | Intergenic                             |
| chr2 | 10631016  | 10631140  | Intergenic                             |
| chr2 | 11893753  | 11893877  | intron (NM_145693, intron 1 of 19)     |
| chr2 | 20431518  | 20431642  | Intergenic                             |
| chr2 | 26366954  | 26367078  | Intergenic                             |
| chr2 | 38670199  | 38670323  | Intergenic                             |
| chr2 | 43313694  | 43313818  | Intergenic                             |
| chr2 | 45686407  | 45686531  | intron (NM_018079, intron 16 of 20)    |
| chr2 | 56185566  | 56185690  | Intergenic                             |
| chr2 | 62805437  | 62805561  | Intergenic                             |
| chr2 | 64343023  | 64343147  | intron (NM_020651, intron 1 of 6)      |
| chr2 | 84179993  | 84180117  | Intergenic                             |
| chr2 | 85196747  | 85196871  | Intergenic                             |
| chr2 | 96926246  | 96926370  | intron (NM_017849, intron 2 of 3)      |
| chr2 | 97093877  | 97094001  | Intergenic                             |
| chr2 | 99374746  | 99374870  | Intergenic                             |
| chr2 | 99485698  | 99485822  | intron (NM_207362, intron 1 of 9)      |
| chr2 | 109065498 | 109065622 | promoter-TSS (NR_028063)               |
| chr2 | 118870479 | 118870603 | Intergenic                             |
| chr2 | 118880647 | 118880771 | Intergenic                             |
| chr2 | 121886449 | 121886573 | Intergenic                             |
| chr2 | 122118244 | 122118368 | intron (NM_001207051, intron 35 of 37) |
| chr2 | 128848650 | 128848774 | promoter-TSS (NR_027671)               |
| chr2 | 138451239 | 138451363 | Intergenic                             |
| chr2 | 142948614 | 142948738 | Intergenic                             |
| chr2 | 144698453 | 144698577 | Intergenic                             |
| chr2 | 150734632 | 150734756 | Intergenic                             |



|      |           |           |                                        |
|------|-----------|-----------|----------------------------------------|
| chr2 | 153032465 | 153032589 | promoter-TSS (NM_005843)               |
| chr2 | 159456975 | 159457099 | intron (NM_001005476, intron 3 of 20)  |
| chr2 | 159980963 | 159981087 | intron (NM_033394, intron 4 of 26)     |
| chr2 | 160353835 | 160353959 | intron (NM_013450, intron 2 of 36)     |
| chr2 | 161826606 | 161826730 | Intergenic                             |
| chr2 | 163589556 | 163589680 | intron (NM_033272, intron 2 of 15)     |
| chr2 | 165567550 | 165567674 | intron (NM_014900, intron 6 of 13)     |
| chr2 | 169659005 | 169659129 | promoter-TSS (NM_001039724)            |
| chr2 | 187454582 | 187454706 | promoter-TSS (NM_002210)               |
| chr2 | 188366914 | 188367038 | intron (NM_001032281, intron 2 of 6)   |
| chr2 | 188419143 | 188419267 | promoter-TSS (NM_006287)               |
| chr2 | 190387614 | 190387738 | Intergenic                             |
| chr2 | 192242106 | 192242230 | intron (NM_001161819, intron 13 of 30) |
| chr2 | 192545082 | 192545206 | intron (NR_045623, intron 2 of 6)      |
| chr2 | 204676364 | 204676488 | Intergenic                             |
| chr2 | 206840122 | 206840246 | Intergenic                             |
| chr2 | 208684638 | 208684762 | Intergenic                             |
| chr2 | 213777282 | 213777406 | Intergenic                             |
| chr2 | 214153753 | 214153877 | intron (NR_047659, intron 2 of 17)     |
| chr2 | 216545882 | 216546006 | intron (NR_037195, intron 5 of 9)      |
| chr2 | 216922399 | 216922523 | intron (NM_018441, intron 4 of 7)      |
| chr2 | 219051192 | 219051316 | Intergenic                             |
| chr2 | 231191803 | 231191927 | promoter-TSS (NM_138402)               |
| chr2 | 235112132 | 235112256 | Intergenic                             |
| chr2 | 236451560 | 236451684 | intron (NM_001037131, intron 1 of 17)  |
| chr2 | 241505284 | 241505408 | Intergenic                             |
| chr2 | 242314095 | 242314219 | intron (NM_014808, intron 2 of 26)     |
| chr3 | 7546602   | 7546726   | intron (NM_000844, intron 7 of 9)      |
| chr3 | 13041109  | 13041233  | intron (NM_001134382, intron 1 of 14)  |
| chr3 | 15419747  | 15419871  | Intergenic                             |
| chr3 | 19930896  | 19931020  | intron (NM_144715, intron 9 of 12)     |
| chr3 | 39166915  | 39167039  | exon (NM_001105513, exon 10 of 28)     |
| chr3 | 40841959  | 40842083  | Intergenic                             |
| chr3 | 42694335  | 42694459  | promoter-TSS (NM_145166)               |
| chr3 | 45730549  | 45730673  | promoter-TSS (NM_014016)               |
| chr3 | 46249952  | 46250076  | promoter-TSS (NM_001295)               |
| chr3 | 49538588  | 49538712  | intron (NM_001165928, intron 4 of 5)   |
| chr3 | 57094486  | 57094610  | promoter-TSS (NM_181727)               |
| chr3 | 58633541  | 58633665  | intron (NM_138805, intron 4 of 9)      |
| chr3 | 65938026  | 65938150  | intron (NM_015520, intron 1 of 24)     |
| chr3 | 80745667  | 80745791  | Intergenic                             |
| chr3 | 95986561  | 95986685  | Intergenic                             |
| chr3 | 112518943 | 112519067 | Intergenic                             |
| chr3 | 121638105 | 121638229 | intron (NM_021082, intron 7 of 21)     |
| chr3 | 127539443 | 127539567 | intron (NM_001256585, intron 2 of 6)   |

|      |           |           |                                       |
|------|-----------|-----------|---------------------------------------|
| chr3 | 129118468 | 129118592 | promoter-TSS (NR_003111)              |
| chr3 | 133662472 | 133662596 | intron (NM_005630, intron 10 of 13)   |
| chr3 | 133665390 | 133665514 | intron (NM_005630, intron 9 of 13)    |
| chr3 | 134346758 | 134346882 | intron (NM_178554, intron 4 of 10)    |
| chr3 | 135905217 | 135905341 | intron (NM_018133, intron 1 of 1)     |
| chr3 | 138048059 | 138048183 | intron (NM_178130, intron 2 of 11)    |
| chr3 | 141087062 | 141087186 | intron (NM_001080412, intron 1 of 7)  |
| chr3 | 141204953 | 141205077 | promoter-TSS (NM_006506)              |
| chr3 | 141659091 | 141659215 | Intergenic                            |
| chr3 | 141934128 | 141934252 | intron (NM_001039547, intron 2 of 15) |
| chr3 | 142316992 | 142317116 | intron (NM_001145319, intron 1 of 15) |
| chr3 | 142679401 | 142679525 | TTS (NM_198504)                       |
| chr3 | 143162710 | 143162834 | intron (NM_173653, intron 12 of 15)   |
| chr3 | 143184688 | 143184812 | intron (NM_173653, intron 12 of 15)   |
| chr3 | 146224581 | 146224705 | Intergenic                            |
| chr3 | 148598556 | 148598680 | intron (NM_001870, intron 6 of 10)    |
| chr3 | 149119087 | 149119211 | Intergenic                            |
| chr3 | 150264370 | 150264494 | promoter-TSS (NM_014445)              |
| chr3 | 151765417 | 151765541 | Intergenic                            |
| chr3 | 152189828 | 152189952 | Intergenic                            |
| chr3 | 152545997 | 152546121 | Intergenic                            |
| chr3 | 152770034 | 152770158 | Intergenic                            |
| chr3 | 152856515 | 152856639 | Intergenic                            |
| chr3 | 153966113 | 153966237 | intron (NM_015595, intron 12 of 14)   |
| chr3 | 155455634 | 155455758 | Intergenic                            |
| chr3 | 156399002 | 156399126 | intron (NM_001184717, intron 2 of 5)  |
| chr3 | 157827820 | 157827944 | promoter-TSS (NM_001271838)           |
| chr3 | 158489833 | 158489957 | Intergenic                            |
| chr3 | 158887746 | 158887870 | intron (NM_001197114, intron 1 of 9)  |
| chr3 | 159136826 | 159136950 | intron (NM_001197108, intron 1 of 6)  |
| chr3 | 160984521 | 160984645 | Intergenic                            |
| chr3 | 161033818 | 161033942 | Intergenic                            |
| chr3 | 167883491 | 167883615 | Intergenic                            |
| chr3 | 169102458 | 169102582 | intron (NM_004991, intron 1 of 16)    |
| chr3 | 170469278 | 170469402 | Intergenic                            |
| chr3 | 170720020 | 170720144 | intron (NM_000340, intron 8 of 10)    |
| chr3 | 171046621 | 171046745 | intron (NM_001161565, intron 2 of 30) |
| chr3 | 171562669 | 171562793 | intron (NM_001164436, intron 1 of 4)  |
| chr3 | 171685106 | 171685230 | Intergenic                            |
| chr3 | 171805818 | 171805942 | intron (NM_001135095, intron 1 of 25) |
| chr3 | 171860404 | 171860528 | intron (NM_022763, intron 3 of 25)    |
| chr3 | 172406456 | 172406580 | intron (NM_001146276, intron 1 of 4)  |
| chr3 | 172416084 | 172416208 | intron (NM_001146276, intron 1 of 4)  |
| chr3 | 172428968 | 172429092 | promoter-TSS (NM_020792)              |
| chr3 | 173246989 | 173247113 | intron (NM_014932, intron 2 of 6)     |

|      |           |           |                                       |
|------|-----------|-----------|---------------------------------------|
| chr3 | 173466058 | 173466182 | intron (NM_014932, intron 3 of 6)     |
| chr3 | 174580084 | 174580208 | intron (NM_207015, intron 1 of 13)    |
| chr3 | 175064848 | 175064972 | intron (NM_207015, intron 5 of 13)    |
| chr3 | 177063489 | 177063613 | Intergenic                            |
| chr3 | 177246402 | 177246526 | intron (NR_047568, intron 1 of 3)     |
| chr3 | 177646036 | 177646160 | Intergenic                            |
| chr3 | 180319897 | 180320021 | promoter-TSS (NM_001042601)           |
| chr3 | 182002806 | 182002930 | Intergenic                            |
| chr3 | 182825778 | 182825902 | Intergenic                            |
| chr3 | 183100287 | 183100411 | intron (NM_015078, intron 2 of 29)    |
| chr3 | 183853099 | 183853223 | 5' UTR (NM_003907, exon 1 of 16)      |
| chr3 | 184089428 | 184089552 | TTS (NM_001177597)                    |
| chr3 | 185069760 | 185069884 | intron (NM_001242317, intron 2 of 12) |
| chr3 | 185255332 | 185255456 | intron (NM_139248, intron 1 of 9)     |
| chr3 | 186163390 | 186163514 | Intergenic                            |
| chr3 | 186463965 | 186464089 | Intergenic                            |
| chr3 | 187930050 | 187930174 | promoter-TSS (NM_005578)              |
| chr3 | 188156989 | 188157113 | intron (NM_001167672, intron 2 of 9)  |
| chr3 | 188906289 | 188906413 | intron (NM_198485, intron 1 of 5)     |
| chr3 | 189034249 | 189034373 | intron (NM_198485, intron 5 of 5)     |
| chr3 | 189042606 | 189042730 | Intergenic                            |
| chr3 | 190284437 | 190284561 | intron (NM_001167931, intron 3 of 11) |
| chr3 | 190604965 | 190605089 | Intergenic                            |
| chr3 | 193500147 | 193500271 | Intergenic                            |
| chr3 | 193561726 | 193561850 | Intergenic                            |
| chr3 | 193723007 | 193723131 | Intergenic                            |
| chr3 | 193807421 | 193807545 | Intergenic                            |
| chr3 | 194248007 | 194248131 | Intergenic                            |
| chr3 | 194304689 | 194304813 | promoter-TSS (NR_047573)              |
| chr3 | 195309979 | 195310103 | intron (NM_001647, intron 1 of 4)     |
| chr4 | 11634143  | 11634267  | Intergenic                            |
| chr4 | 19741083  | 19741207  | Intergenic                            |
| chr4 | 38689238  | 38689362  | intron (NM_016531, intron 2 of 5)     |
| chr4 | 54510979  | 54511103  | Intergenic                            |
| chr4 | 74642025  | 74642149  | Intergenic                            |
| chr4 | 77586506  | 77586630  | intron (NM_020859, intron 2 of 10)    |
| chr4 | 90349139  | 90349263  | Intergenic                            |
| chr4 | 120715929 | 120716053 | Intergenic                            |
| chr4 | 122383936 | 122384060 | Intergenic                            |
| chr4 | 129349091 | 129349215 | Intergenic                            |
| chr4 | 143471273 | 143471397 | intron (NM_003866, intron 2 of 26)    |
| chr4 | 147162749 | 147162873 | Intergenic                            |
| chr4 | 147442131 | 147442255 | intron (NM_001029998, intron 1 of 11) |
| chr4 | 174089300 | 174089424 | promoter-TSS (NM_017423)              |
| chr4 | 185276447 | 185276571 | Intergenic                            |

|      |           |           |                                       |
|------|-----------|-----------|---------------------------------------|
| chr5 | 19041381  | 19041505  | Intergenic                            |
| chr5 | 33440702  | 33440826  | promoter-TSS (NM_152295)              |
| chr5 | 40775685  | 40775809  | intron (NM_206907, intron 2 of 9)     |
| chr5 | 52283539  | 52283663  | Intergenic                            |
| chr5 | 53997246  | 53997370  | Intergenic                            |
| chr5 | 57531257  | 57531381  | Intergenic                            |
| chr5 | 60704440  | 60704564  | intron (NM_020928, intron 1 of 13)    |
| chr5 | 67692706  | 67692830  | Intergenic                            |
| chr5 | 71218887  | 71219011  | Intergenic                            |
| chr5 | 72248013  | 72248137  | Intergenic                            |
| chr5 | 73939228  | 73939352  | Intergenic                            |
| chr5 | 75012908  | 75013032  | intron (NM_001099271, intron 1 of 11) |
| chr5 | 78597293  | 78597417  | intron (NM_152405, intron 6 of 10)    |
| chr5 | 79477674  | 79477798  | intron (NM_001174071, intron 2 of 12) |
| chr5 | 81147837  | 81147961  | Intergenic                            |
| chr5 | 84589381  | 84589505  | Intergenic                            |
| chr5 | 86371214  | 86371338  | Intergenic                            |
| chr5 | 86410460  | 86410584  | TTS (NR_036243)                       |
| chr5 | 90467245  | 90467369  | Intergenic                            |
| chr5 | 90607693  | 90607817  | Intergenic                            |
| chr5 | 93447365  | 93447489  | promoter-TSS (NM_032042)              |
| chr5 | 106724947 | 106725071 | intron (NM_001962, intron 2 of 4)     |
| chr5 | 106725534 | 106725658 | intron (NM_001962, intron 2 of 4)     |
| chr5 | 108416689 | 108416813 | intron (NM_005246, intron 16 of 19)   |
| chr5 | 114715689 | 114715813 | Intergenic                            |
| chr5 | 114755664 | 114755788 | Intergenic                            |
| chr5 | 118638753 | 118638877 | intron (NM_001077654, intron 1 of 1)  |
| chr5 | 123935466 | 123935590 | Intergenic                            |
| chr5 | 124148526 | 124148650 | Intergenic                            |
| chr5 | 126339956 | 126340080 | intron (NM_178450, intron 1 of 4)     |
| chr5 | 126539656 | 126539780 | Intergenic                            |
| chr5 | 126656470 | 126656594 | intron (NM_032446, intron 2 of 25)    |
| chr5 | 129625429 | 129625553 | Intergenic                            |
| chr5 | 130109586 | 130109710 | Intergenic                            |
| chr5 | 130616884 | 130617008 | intron (NM_001038702, intron 1 of 4)  |
| chr5 | 130718179 | 130718303 | intron (NM_001038702, intron 2 of 4)  |
| chr5 | 131723410 | 131723534 | intron (NM_003060, intron 5 of 9)     |
| chr5 | 131765527 | 131765651 | intron (NR_045116, intron 2 of 3)     |
| chr5 | 133332464 | 133332588 | intron (NM_003374, intron 1 of 8)     |
| chr5 | 133772703 | 133772827 | Intergenic                            |
| chr5 | 134896661 | 134896785 | Intergenic                            |
| chr5 | 135347808 | 135347932 | Intergenic                            |
| chr5 | 138861935 | 138862059 | intron (NM_198282, intron 1 of 7)     |
| chr5 | 139511583 | 139511707 | Intergenic                            |
| chr5 | 140044225 | 140044349 | promoter-TSS (NM_017706)              |

|      |           |           |                                        |
|------|-----------|-----------|----------------------------------------|
| chr5 | 140383985 | 140384109 | intron (NM_031849, intron 3 of 3)      |
| chr5 | 145407447 | 145407571 | intron (NM_152550, intron 5 of 9)      |
| chr5 | 148352718 | 148352842 | Intergenic                             |
| chr5 | 148724922 | 148725046 | promoter-TSS (NM_152407)               |
| chr5 | 151121319 | 151121443 | Intergenic                             |
| chr5 | 154140737 | 154140861 | intron (NM_015315, intron 1 of 18)     |
| chr5 | 162834444 | 162834568 | Intergenic                             |
| chr5 | 167751995 | 167752119 | intron (NM_001161661, intron 1 of 22)  |
| chr5 | 168078754 | 168078878 | Intergenic                             |
| chr5 | 172234233 | 172234357 | Intergenic                             |
| chr5 | 176250367 | 176250491 | intron (NM_133369, intron 1 of 14)     |
| chr5 | 176816839 | 176816963 | 3' UTR (NM_001167579, exon 9 of 9)     |
| chr5 | 179512296 | 179512420 | Intergenic                             |
| chr5 | 180288480 | 180288604 | promoter-TSS (NM_001172638)            |
| chr5 | 180618611 | 180618735 | Intergenic                             |
| chr6 | 6811535   | 6811659   | Intergenic                             |
| chr6 | 7042634   | 7042758   | Intergenic                             |
| chr6 | 11632584  | 11632708  | Intergenic                             |
| chr6 | 21742618  | 21742742  | intron (NR_015410, intron 2 of 11)     |
| chr6 | 25866430  | 25866554  | intron (NM_001098486, intron 2 of 12)  |
| chr6 | 26016980  | 26017104  | TTS (NM_005325)                        |
| chr6 | 30484403  | 30484527  | Intergenic                             |
| chr6 | 33330021  | 33330145  | Intergenic                             |
| chr6 | 47012279  | 47012403  | Intergenic                             |
| chr6 | 47428176  | 47428300  | Intergenic                             |
| chr6 | 81348530  | 81348654  | Intergenic                             |
| chr6 | 107639426 | 107639550 | intron (NM_020381, intron 2 of 7)      |
| chr6 | 109053986 | 109054110 | Intergenic                             |
| chr6 | 109550850 | 109550974 | Intergenic                             |
| chr6 | 112163169 | 112163293 | intron (NM_002037, intron 2 of 13)     |
| chr6 | 119468729 | 119468853 | intron (NM_001100411, intron 1 of 16)  |
| chr6 | 123005299 | 123005423 | intron (NM_001270393, intron 6 of 7)   |
| chr6 | 125320390 | 125320514 | intron (NM_152553, intron 2 of 8)      |
| chr6 | 126362080 | 126362204 | Intergenic                             |
| chr6 | 136571378 | 136571502 | promoter-TSS (NM_001099286)            |
| chr6 | 158481537 | 158481661 | intron (NM_001178088, intron 6 of 25)  |
| chr6 | 163813140 | 163813264 | Intergenic                             |
| chr6 | 167150150 | 167150274 | intron (NM_001006932, intron 2 of 21)  |
| chr6 | 168083625 | 168083749 | Intergenic                             |
| chr7 | 988898    | 989022    | intron (NM_006869, intron 1 of 10)     |
| chr7 | 1495328   | 1495452   | intron (NM_182924, intron 1 of 16)     |
| chr7 | 2611740   | 2611864   | intron (NM_152558, intron 4 of 21)     |
| chr7 | 5436825   | 5436949   | intron (NM_001080495, intron 2 of 29)  |
| chr7 | 5601683   | 5601807   | Intergenic                             |
| chr7 | 7455926   | 7456050   | intron (NM_001037763, intron 27 of 34) |

|      |           |           |                                        |
|------|-----------|-----------|----------------------------------------|
| chr7 | 13889858  | 13889982  | Intergenic                             |
| chr7 | 16468476  | 16468600  | Intergenic                             |
| chr7 | 17170030  | 17170154  | Intergenic                             |
| chr7 | 17409755  | 17409879  | Intergenic                             |
| chr7 | 17484438  | 17484562  | Intergenic                             |
| chr7 | 17572777  | 17572901  | Intergenic                             |
| chr7 | 17712537  | 17712661  | Intergenic                             |
| chr7 | 18053772  | 18053896  | Intergenic                             |
| chr7 | 18707225  | 18707349  | 3' UTR (NM_001204146, exon 11 of 11)   |
| chr7 | 20239173  | 20239297  | intron (NM_182762, intron 1 of 6)      |
| chr7 | 22143424  | 22143548  | Intergenic                             |
| chr7 | 23510421  | 23510545  | promoter-TSS (NM_006547)               |
| chr7 | 25608594  | 25608718  | Intergenic                             |
| chr7 | 26131786  | 26131910  | Intergenic                             |
| chr7 | 27086623  | 27086747  | Intergenic                             |
| chr7 | 27275040  | 27275164  | Intergenic                             |
| chr7 | 27334932  | 27335056  | Intergenic                             |
| chr7 | 28104149  | 28104273  | intron (NM_175061, intron 1 of 4)      |
| chr7 | 28966747  | 28966871  | Intergenic                             |
| chr7 | 30027661  | 30027785  | intron (NM_001145514, intron 1 of 7)   |
| chr7 | 31533391  | 31533515  | Intergenic                             |
| chr7 | 31915147  | 31915271  | intron (NM_005020, intron 6 of 17)     |
| chr7 | 37071541  | 37071665  | intron (NM_001206480, intron 15 of 21) |
| chr7 | 37960161  | 37960285  | promoter-TSS (NM_001242948)            |
| chr7 | 38262239  | 38262363  | intron (NM_032016, intron 7 of 8)      |
| chr7 | 41229699  | 41229823  | Intergenic                             |
| chr7 | 41264241  | 41264365  | Intergenic                             |
| chr7 | 43687640  | 43687764  | intron (NR_047701, intron 3 of 7)      |
| chr7 | 44678882  | 44679006  | intron (NM_001003941, intron 2 of 8)   |
| chr7 | 46690873  | 46690997  | Intergenic                             |
| chr7 | 47615722  | 47615846  | intron (NM_022748, intron 1 of 30)     |
| chr7 | 48031798  | 48031922  | intron (NM_001030019, intron 8 of 9)   |
| chr7 | 51410001  | 51410125  | Intergenic                             |
| chr7 | 77111436  | 77111560  | Intergenic                             |
| chr7 | 97601569  | 97601693  | promoter-TSS (NR_002822)               |
| chr7 | 98970248  | 98970372  | Intergenic                             |
| chr7 | 100143208 | 100143332 | intron (NM_006076, intron 1 of 11)     |
| chr7 | 100143871 | 100143995 | intron (NM_006076, intron 1 of 11)     |
| chr7 | 105447127 | 105447251 | intron (NM_020725, intron 2 of 11)     |
| chr7 | 130572003 | 130572127 | intron (NR_034120, intron 2 of 3)      |
| chr7 | 130692375 | 130692499 | intron (NR_024153, intron 1 of 2)      |
| chr7 | 133538744 | 133538868 | intron (NM_021807, intron 11 of 17)    |
| chr7 | 138571394 | 138571518 | intron (NM_001164665, intron 10 of 19) |
| chr7 | 141804702 | 141804826 | intron (NM_004668, intron 47 of 47)    |
| chr7 | 143065140 | 143065264 | Intergenic                             |

|      |           |           |                                       |
|------|-----------|-----------|---------------------------------------|
| chr7 | 148842427 | 148842551 | intron (NM_020781, intron 2 of 6)     |
| chr7 | 151189074 | 151189198 | intron (NM_005614, intron 1 of 7)     |
| chr8 | 8153925   | 8154049   | Intergenic                            |
| chr8 | 8170217   | 8170341   | Intergenic                            |
| chr8 | 8414573   | 8414697   | Intergenic                            |
| chr8 | 18067598  | 18067722  | promoter-TSS (NM_001160172)           |
| chr8 | 24151459  | 24151583  | promoter-TSS (NM_014265)              |
| chr8 | 27182927  | 27183051  | promoter-TSS (NM_173176)              |
| chr8 | 29999222  | 29999346  | intron (NM_001100916, intron 1 of 2)  |
| chr8 | 30112454  | 30112578  | Intergenic                            |
| chr8 | 30295858  | 30295982  | intron (NM_001008710, intron 1 of 8)  |
| chr8 | 31691166  | 31691290  | intron (NM_013962, intron 1 of 4)     |
| chr8 | 32191946  | 32192070  | intron (NM_013962, intron 1 of 4)     |
| chr8 | 33411702  | 33411826  | intron (NM_024787, intron 2 of 5)     |
| chr8 | 37749531  | 37749655  | intron (NM_001002814, intron 1 of 5)  |
| chr8 | 38384864  | 38384988  | intron (NM_207412, intron 1 of 2)     |
| chr8 | 38895683  | 38895807  | intron (NR_027638, intron 11 of 20)   |
| chr8 | 39797573  | 39797697  | intron (NM_194294, intron 1 of 10)    |
| chr8 | 42114268  | 42114392  | Intergenic                            |
| chr8 | 67579723  | 67579847  | promoter-TSS (NM_001204173)           |
| chr8 | 101881894 | 101882018 | Intergenic                            |
| chr8 | 102171238 | 102171362 | Intergenic                            |
| chr8 | 107218730 | 107218854 | Intergenic                            |
| chr8 | 122824134 | 122824258 | Intergenic                            |
| chr8 | 123476178 | 123476302 | Intergenic                            |
| chr8 | 123807354 | 123807478 | intron (NM_014943, intron 1 of 3)     |
| chr8 | 123818268 | 123818392 | intron (NM_014943, intron 1 of 3)     |
| chr8 | 124549963 | 124550087 | intron (NM_058229, intron 1 of 8)     |
| chr8 | 124560643 | 124560767 | Intergenic                            |
| chr8 | 124934556 | 124934680 | intron (NM_001039112, intron 1 of 40) |
| chr8 | 125488559 | 125488683 | intron (NM_007218, intron 1 of 1)     |
| chr8 | 126181158 | 126181282 | intron (NM_173685, intron 4 of 7)     |
| chr8 | 126226619 | 126226743 | intron (NM_173685, intron 5 of 7)     |
| chr8 | 126304205 | 126304329 | intron (NM_173685, intron 5 of 7)     |
| chr8 | 128307073 | 128307197 | Intergenic                            |
| chr8 | 128521844 | 128521968 | Intergenic                            |
| chr8 | 129188949 | 129189073 | Intergenic                            |
| chr8 | 129189373 | 129189497 | Intergenic                            |
| chr8 | 130720022 | 130720146 | Intergenic                            |
| chr8 | 131275017 | 131275141 | intron (NM_018482, intron 3 of 29)    |
| chr8 | 133333755 | 133333879 | intron (NM_004519, intron 1 of 14)    |
| chr8 | 133520056 | 133520180 | Intergenic                            |
| chr8 | 134664324 | 134664448 | Intergenic                            |
| chr8 | 135904986 | 135905110 | Intergenic                            |
| chr8 | 140227437 | 140227561 | Intergenic                            |

|       |           |           |                                       |
|-------|-----------|-----------|---------------------------------------|
| chr8  | 141601618 | 141601742 | intron (NM_001164623, intron 1 of 17) |
| chr8  | 143757594 | 143757718 | intron (NR_033343, intron 1 of 2)     |
| chr8  | 144655632 | 144655756 | promoter-TSS (NM_001100878)           |
| chr8  | 144980212 | 144980336 | Intergenic                            |
| chr8  | 145547872 | 145547996 | intron (NM_012079, intron 1 of 16)    |
| chr9  | 4243203   | 4243327   | intron (NM_001042413, intron 2 of 10) |
| chr9  | 4277814   | 4277938   | intron (NM_001042413, intron 2 of 10) |
| chr9  | 8907998   | 8908122   | intron (NM_002839, intron 11 of 45)   |
| chr9  | 14212895  | 14213019  | intron (NM_005596, intron 2 of 8)     |
| chr9  | 19380170  | 19380294  | promoter-TSS (NM_001010)              |
| chr9  | 34186440  | 34186564  | intron (NM_001171201, intron 1 of 5)  |
| chr9  | 71795598  | 71795722  | intron (NM_001170630, intron 1 of 18) |
| chr9  | 84352735  | 84352859  | Intergenic                            |
| chr9  | 113515131 | 113515255 | intron (NM_001166280, intron 8 of 12) |
| chr9  | 115086141 | 115086265 | intron (NM_001163788, intron 1 of 13) |
| chr9  | 135424733 | 135424857 | intron (NM_207417, intron 6 of 6)     |
| chr9  | 140506809 | 140506933 | intron (NM_152285, intron 1 of 7)     |
| chr10 | 976636    | 976760    | intron (NM_015155, intron 1 of 17)    |
| chr10 | 1034335   | 1034459   | promoter-TSS (NM_012341)              |
| chr10 | 3088091   | 3088215   | Intergenic                            |
| chr10 | 3514998   | 3515122   | Intergenic                            |
| chr10 | 4746463   | 4746587   | Intergenic                            |
| chr10 | 6317234   | 6317358   | Intergenic                            |
| chr10 | 12085352  | 12085476  | promoter-TSS (NM_080599)              |
| chr10 | 14620705  | 14620829  | intron (NM_031453, intron 2 of 4)     |
| chr10 | 29173555  | 29173679  | Intergenic                            |
| chr10 | 33227478  | 33227602  | intron (NM_002211, intron 1 of 15)    |
| chr10 | 33299008  | 33299132  | Intergenic                            |
| chr10 | 33654773  | 33654897  | Intergenic                            |
| chr10 | 35047416  | 35047540  | intron (NM_001184790, intron 1 of 22) |
| chr10 | 35924539  | 35924663  | Intergenic                            |
| chr10 | 43136554  | 43136678  | Intergenic                            |
| chr10 | 56044432  | 56044556  | intron (NM_001142773, intron 7 of 31) |
| chr10 | 60195951  | 60196075  | Intergenic                            |
| chr10 | 60941527  | 60941651  | intron (NM_001143774, intron 1 of 4)  |
| chr10 | 61725170  | 61725294  | Intergenic                            |
| chr10 | 62042690  | 62042814  | intron (NM_001204403, intron 2 of 43) |
| chr10 | 63517427  | 63517551  | intron (NM_173554, intron 4 of 6)     |
| chr10 | 63771437  | 63771561  | intron (NM_032199, intron 4 of 9)     |
| chr10 | 65467193  | 65467317  | Intergenic                            |
| chr10 | 70310639  | 70310763  | Intergenic                            |
| chr10 | 70715800  | 70715924  | promoter-TSS (NM_001256910)           |
| chr10 | 73006776  | 73006900  | intron (NM_170744, intron 1 of 16)    |
| chr10 | 73103171  | 73103295  | intron (NR_033414, intron 2 of 3)     |
| chr10 | 73931025  | 73931149  | intron (NR_045564, intron 5 of 9)     |



|       |           |           |                                        |
|-------|-----------|-----------|----------------------------------------|
| chr10 | 74398679  | 74398803  | Intergenic                             |
| chr10 | 75949986  | 75950110  | intron (NM_001123, intron 1 of 10)     |
| chr10 | 91043784  | 91043908  | Intergenic                             |
| chr10 | 114787655 | 114787779 | intron (NM_001146274, intron 4 of 13)  |
| chr11 | 561483    | 561607    | promoter-TSS (NM_003475)               |
| chr11 | 7626887   | 7627011   | promoter-TSS (NM_001256569)            |
| chr11 | 9741519   | 9741643   | intron (NM_015055, intron 3 of 11)     |
| chr11 | 16023537  | 16023661  | intron (NM_001145819, intron 13 of 15) |
| chr11 | 18343719  | 18343843  | promoter-TSS (NM_007216)               |
| chr11 | 28780983  | 28781107  | Intergenic                             |
| chr11 | 33713804  | 33713928  | Intergenic                             |
| chr11 | 34255718  | 34255842  | intron (NM_145804, intron 1 of 16)     |
| chr11 | 34400813  | 34400937  | Intergenic                             |
| chr11 | 35030733  | 35030857  | Intergenic                             |
| chr11 | 35099476  | 35099600  | Intergenic                             |
| chr11 | 44976803  | 44976927  | Intergenic                             |
| chr11 | 48131501  | 48131625  | intron (NM_002843, intron 1 of 24)     |
| chr11 | 56622844  | 56622968  | Intergenic                             |
| chr11 | 58953710  | 58953834  | intron (NM_015177, intron 2 of 8)      |
| chr11 | 64863519  | 64863643  | promoter-TSS (NM_013265)               |
| chr11 | 65655932  | 65656056  | promoter-TSS (NM_004214)               |
| chr11 | 66462397  | 66462521  | intron (NM_006946, intron 20 of 36)    |
| chr11 | 67442229  | 67442353  | promoter-TSS (NM_000695)               |
| chr11 | 67858301  | 67858425  | intron (NM_001277, intron 2 of 11)     |
| chr11 | 67913641  | 67913765  | Intergenic                             |
| chr11 | 68065570  | 68065694  | Intergenic                             |
| chr11 | 73587960  | 73588084  | promoter-TSS (NM_016565)               |
| chr11 | 75400950  | 75401074  | Intergenic                             |
| chr11 | 76695860  | 76695984  | intron (NM_018367, intron 4 of 10)     |
| chr11 | 104034801 | 104034925 | 5' UTR (NM_025208, exon 1 of 7)        |
| chr11 | 109817073 | 109817197 | Intergenic                             |
| chr11 | 110216675 | 110216799 | Intergenic                             |
| chr11 | 114067275 | 114067399 | intron (NM_006006, intron 4 of 6)      |
| chr11 | 126686639 | 126686763 | intron (NM_032531, intron 1 of 16)     |
| chr12 | 498402    | 498526    | promoter-TSS (NM_001130147)            |
| chr12 | 647839    | 647963    | intron (NM_173593, intron 3 of 19)     |
| chr12 | 1457266   | 1457390   | intron (NR_027948, intron 15 of 19)    |
| chr12 | 6404504   | 6404628   | Intergenic                             |
| chr12 | 11802018  | 11802142  | promoter-TSS (NM_001987)               |
| chr12 | 12957052  | 12957176  | Intergenic                             |
| chr12 | 13158716  | 13158840  | Intergenic                             |
| chr12 | 13530039  | 13530163  | promoter-TSS (NR_036555)               |
| chr12 | 14360929  | 14361053  | Intergenic                             |
| chr12 | 15843025  | 15843149  | intron (NM_004447, intron 1 of 20)     |
| chr12 | 15853631  | 15853755  | intron (NM_004447, intron 1 of 20)     |

|       |           |           |                                       |
|-------|-----------|-----------|---------------------------------------|
| chr12 | 18299454  | 18299578  | Intergenic                            |
| chr12 | 29534073  | 29534197  | promoter-TSS (NM_016570)              |
| chr12 | 54762524  | 54762648  | TTS (NM_015481)                       |
| chr12 | 63054652  | 63054776  | intron (NM_020700, intron 9 of 9)     |
| chr12 | 63124957  | 63125081  | intron (NM_020700, intron 5 of 9)     |
| chr12 | 65066746  | 65066870  | intron (NR_040718, intron 1 of 3)     |
| chr12 | 65927174  | 65927298  | Intergenic                            |
| chr12 | 66042999  | 66043123  | Intergenic                            |
| chr12 | 66539031  | 66539155  | intron (NM_016056, intron 5 of 6)     |
| chr12 | 76034935  | 76035059  | Intergenic                            |
| chr12 | 76338435  | 76338559  | Intergenic                            |
| chr12 | 76372228  | 76372352  | Intergenic                            |
| chr12 | 79960270  | 79960394  | Intergenic                            |
| chr12 | 82253417  | 82253541  | Intergenic                            |
| chr12 | 82806114  | 82806238  | intron (NM_032230, intron 5 of 11)    |
| chr12 | 89132115  | 89132239  | Intergenic                            |
| chr12 | 89466935  | 89467059  | Intergenic                            |
| chr12 | 91751327  | 91751451  | Intergenic                            |
| chr12 | 94071012  | 94071136  | promoter-TSS (NM_003805)              |
| chr12 | 95598267  | 95598391  | intron (NM_018351, intron 2 of 20)    |
| chr12 | 96591879  | 96592003  | intron (NM_005230, intron 1 of 4)     |
| chr12 | 107234178 | 107234302 | intron (NM_018157, intron 4 of 8)     |
| chr12 | 113376039 | 113376163 | promoter-TSS (NM_006187)              |
| chr12 | 120105684 | 120105808 | promoter-TSS (NM_006253)              |
| chr12 | 120111504 | 120111628 | intron (NM_006253, intron 2 of 6)     |
| chr12 | 120669200 | 120669324 | intron (NM_001080855, intron 1 of 11) |
| chr13 | 24723038  | 24723162  | Intergenic                            |
| chr13 | 34731182  | 34731306  | Intergenic                            |
| chr13 | 35322329  | 35322453  | Intergenic                            |
| chr13 | 40976683  | 40976807  | intron (NR_024506, intron 5 of 5)     |
| chr13 | 41848278  | 41848402  | Intergenic                            |
| chr13 | 47558171  | 47558295  | Intergenic                            |
| chr14 | 22384245  | 22384369  | Intergenic                            |
| chr14 | 23299015  | 23299139  | promoter-TSS (NM_181305)              |
| chr14 | 23340304  | 23340428  | promoter-TSS (NM_014045)              |
| chr14 | 34513001  | 34513125  | Intergenic                            |
| chr14 | 34844693  | 34844817  | Intergenic                            |
| chr14 | 37220468  | 37220592  | intron (NM_030631, intron 3 of 9)     |
| chr14 | 45431177  | 45431301  | promoter-TSS (NM_017658)              |
| chr14 | 53167709  | 53167833  | Intergenic                            |
| chr14 | 56269967  | 56270091  | Intergenic                            |
| chr14 | 61905926  | 61906050  | intron (NM_006255, intron 2 of 13)    |
| chr14 | 62028775  | 62028899  | Intergenic                            |
| chr14 | 62135204  | 62135328  | Intergenic                            |
| chr14 | 65165831  | 65165955  | Intergenic                            |

|       |           |           |                                        |
|-------|-----------|-----------|----------------------------------------|
| chr14 | 65757685  | 65757809  | Intergenic                             |
| chr14 | 69405584  | 69405708  | intron (NM_001130005, intron 1 of 20)  |
| chr14 | 75084807  | 75084931  | Intergenic                             |
| chr14 | 75867110  | 75867234  | Intergenic                             |
| chr14 | 77888608  | 77888732  | intron (NM_001113475, intron 1 of 5)   |
| chr14 | 92339036  | 92339160  | intron (NM_006329, intron 10 of 10)    |
| chr14 | 93412820  | 93412944  | intron (NM_014216, intron 9 of 10)     |
| chr14 | 101943449 | 101943573 | Intergenic                             |
| chr14 | 102746009 | 102746133 | intron (NM_014226, intron 2 of 11)     |
| chr15 | 50716270  | 50716394  | promoter-TSS (NM_005154)               |
| chr15 | 53615557  | 53615681  | Intergenic                             |
| chr15 | 57053214  | 57053338  | Intergenic                             |
| chr15 | 58813884  | 58814008  | intron (NM_000236, intron 1 of 8)      |
| chr15 | 59158628  | 59158752  | Intergenic                             |
| chr15 | 59566899  | 59567023  | intron (NM_004998, intron 1 of 27)     |
| chr15 | 59592687  | 59592811  | intron (NM_004998, intron 1 of 27)     |
| chr15 | 60700777  | 60700901  | Intergenic                             |
| chr15 | 62411720  | 62411844  | Intergenic                             |
| chr15 | 63182377  | 63182501  | Intergenic                             |
| chr15 | 63188335  | 63188459  | Intergenic                             |
| chr15 | 63797871  | 63797995  | intron (NR_046342, intron 1 of 15)     |
| chr15 | 64679778  | 64679902  | promoter-TSS (NM_016213)               |
| chr15 | 67224579  | 67224703  | Intergenic                             |
| chr15 | 67440784  | 67440908  | intron (NM_001145103, intron 1 of 8)   |
| chr15 | 71075502  | 71075626  | Intergenic                             |
| chr15 | 71428819  | 71428943  | Intergenic                             |
| chr15 | 72448485  | 72448609  | Intergenic                             |
| chr15 | 72519058  | 72519182  | intron (NM_001206798, intron 1 of 10)  |
| chr15 | 74092995  | 74093119  | Intergenic                             |
| chr15 | 74281810  | 74281934  | intron (NM_001256672, intron 2 of 6)   |
| chr15 | 74908819  | 74908943  | intron (NM_001130028, intron 1 of 12)  |
| chr15 | 75160451  | 75160575  | intron (NM_005697, intron 1 of 8)      |
| chr15 | 75339503  | 75339627  | intron (NM_021823, intron 4 of 5)      |
| chr15 | 75468090  | 75468214  | Intergenic                             |
| chr15 | 75918088  | 75918212  | 5' UTR (NM_001042581, exon 1 of 9)     |
| chr15 | 76591492  | 76591616  | intron (NM_000126, intron 1 of 11)     |
| chr15 | 78667519  | 78667643  | Intergenic                             |
| chr15 | 79296868  | 79296992  | intron (NM_001145648, intron 14 of 26) |
| chr15 | 80729157  | 80729281  | intron (NM_014862, intron 1 of 18)     |
| chr15 | 90590198  | 90590322  | intron (NM_198526, intron 1 of 4)      |
| chr15 | 93340371  | 93340495  | TTS (NR_033769)                        |
| chr15 | 101708435 | 101708559 | Intergenic                             |
| chr16 | 88964     | 89088     | Intergenic                             |
| chr16 | 1660624   | 1660748   | 5' UTR (NM_014714, exon 2 of 31)       |
| chr16 | 2885757   | 2885881   | Intergenic                             |

|       |          |          |                                       |
|-------|----------|----------|---------------------------------------|
| chr16 | 4250323  | 4250447  | intron (NM_001098814, intron 3 of 5)  |
| chr16 | 8891608  | 8891732  | promoter-TSS (NM_000303)              |
| chr16 | 9217894  | 9218018  | Intergenic                            |
| chr16 | 11706232 | 11706356 | Intergenic                            |
| chr16 | 14091848 | 14091972 | Intergenic                            |
| chr16 | 15684807 | 15684931 | Intergenic                            |
| chr16 | 15993453 | 15993577 | Intergenic                            |
| chr16 | 17489984 | 17490108 | intron (NM_022166, intron 1 of 11)    |
| chr16 | 19142143 | 19142267 | Intergenic                            |
| chr16 | 19440629 | 19440753 | intron (NM_001261841, intron 1 of 21) |
| chr16 | 19443842 | 19443966 | intron (NM_001105248, intron 2 of 21) |
| chr16 | 20922154 | 20922278 | intron (NM_001128301, intron 2 of 4)  |
| chr16 | 21312059 | 21312183 | promoter-TSS (NR_026675)              |
| chr16 | 22199951 | 22200075 | Intergenic                            |
| chr16 | 23710606 | 23710730 | intron (NM_033266, intron 13 of 21)   |
| chr16 | 24859538 | 24859662 | intron (NM_001258413, intron 2 of 15) |
| chr16 | 25120995 | 25121119 | Intergenic                            |
| chr16 | 28503371 | 28503495 | promoter-TSS (NM_000086)              |
| chr16 | 29827257 | 29827381 | promoter-TSS (NM_024516)              |
| chr16 | 30759394 | 30759518 | promoter-TSS (NM_001172432)           |
| chr16 | 48431291 | 48431415 | Intergenic                            |
| chr16 | 51278081 | 51278205 | Intergenic                            |
| chr16 | 58058498 | 58058622 | promoter-TSS (NM_002428)              |
| chr16 | 67970744 | 67970868 | promoter-TSS (NM_002801)              |
| chr16 | 68267992 | 68268116 | intron (NM_024939, intron 2 of 14)    |
| chr16 | 71549119 | 71549243 | Intergenic                            |
| chr16 | 77225004 | 77225128 | 5' UTR (NM_014940, exon 1 of 6)       |
| chr16 | 80574818 | 80574942 | promoter-TSS (NM_130897)              |
| chr16 | 81002678 | 81002802 | Intergenic                            |
| chr16 | 81031295 | 81031419 | intron (NM_020188, intron 1 of 3)     |
| chr16 | 81327956 | 81328080 | Intergenic                            |
| chr16 | 81614812 | 81614936 | intron (NM_030629, intron 1 of 20)    |
| chr16 | 84534810 | 84534934 | intron (NM_020947, intron 1 of 7)     |
| chr16 | 84652588 | 84652712 | promoter-TSS (NM_021149)              |
| chr16 | 89572013 | 89572137 | Intergenic                            |
| chr16 | 89648661 | 89648785 | intron (NM_014427, intron 3 of 16)    |
| chr17 | 12634523 | 12634647 | intron (NM_153604, intron 5 of 12)    |
| chr17 | 28672040 | 28672164 | Intergenic                            |
| chr17 | 32052836 | 32052960 | intron (NM_001094, intron 1 of 9)     |
| chr17 | 33047994 | 33048118 | Intergenic                            |
| chr17 | 33048381 | 33048505 | Intergenic                            |
| chr17 | 33846562 | 33846686 | Intergenic                            |
| chr17 | 35969412 | 35969536 | promoter-TSS (NM_001163547)           |
| chr17 | 36106655 | 36106779 | Intergenic                            |
| chr17 | 36906058 | 36906182 | Intergenic                            |

|       |          |          |                                       |
|-------|----------|----------|---------------------------------------|
| chr17 | 40086796 | 40086920 | promoter-TSS (NM_031421)              |
| chr17 | 40714105 | 40714229 | promoter-TSS (NM_001042529)           |
| chr17 | 42581003 | 42581127 | promoter-TSS (NR_036474)              |
| chr17 | 46679111 | 46679235 | intron (NR_033202, intron 2 of 2)     |
| chr17 | 46868444 | 46868568 | intron (NM_001130918, intron 9 of 15) |
| chr17 | 48075775 | 48075899 | Intergenic                            |
| chr17 | 48945021 | 48945145 | non-coding (NR_038458, exon 2 of 2)   |
| chr17 | 50383887 | 50384011 | Intergenic                            |
| chr17 | 55977337 | 55977461 | intron (NM_001271875, intron 1 of 10) |
| chr17 | 57925274 | 57925398 | Intergenic                            |
| chr17 | 69325556 | 69325680 | Intergenic                            |
| chr17 | 70455079 | 70455203 | intron (NR_036488, intron 1 of 3)     |
| chr17 | 73613472 | 73613596 | intron (NR_003587, intron 39 of 60)   |
| chr17 | 73693415 | 73693539 | intron (NM_013260, intron 4 of 10)    |
| chr17 | 74637792 | 74637916 | intron (NM_018414, intron 1 of 8)     |
| chr17 | 74641785 | 74641909 | Intergenic                            |
| chr17 | 75084677 | 75084801 | promoter-TSS (NR_003013)              |
| chr17 | 75338543 | 75338667 | intron (NM_006640, intron 1 of 10)    |
| chr17 | 76954699 | 76954823 | Intergenic                            |
| chr17 | 78228729 | 78228853 | Intergenic                            |
| chr17 | 80817934 | 80818058 | intron (NM_005993, intron 13 of 38)   |
| chr18 | 2222927  | 2223051  | Intergenic                            |
| chr18 | 2411585  | 2411709  | Intergenic                            |
| chr18 | 3045533  | 3045657  | Intergenic                            |
| chr18 | 9101894  | 9102018  | promoter-TSS (NM_021074)              |
| chr18 | 9825597  | 9825721  | intron (NM_006868, intron 5 of 6)     |
| chr18 | 12838178 | 12838302 | intron (NM_001207013, intron 2 of 10) |
| chr18 | 20131906 | 20132030 | Intergenic                            |
| chr18 | 21166715 | 21166839 | promoter-TSS (NM_000271)              |
| chr18 | 21408545 | 21408669 | intron (NM_198129, intron 23 of 74)   |
| chr18 | 29952658 | 29952782 | intron (NM_022751, intron 2 of 5)     |
| chr18 | 30696580 | 30696704 | intron (NM_198995, intron 19 of 21)   |
| chr18 | 30764297 | 30764421 | intron (NM_198995, intron 19 of 21)   |
| chr18 | 33077847 | 33077971 | promoter-TSS (NM_001098817)           |
| chr18 | 47624145 | 47624269 | intron (NM_001080467, intron 1 of 39) |
| chr18 | 48362911 | 48363035 | Intergenic                            |
| chr18 | 52443054 | 52443178 | Intergenic                            |
| chr18 | 55297431 | 55297555 | promoter-TSS (NM_001242804)           |
| chr18 | 55396625 | 55396749 | intron (NM_005603, intron 2 of 27)    |
| chr18 | 55438572 | 55438696 | intron (NM_005603, intron 1 of 27)    |
| chr18 | 60088161 | 60088285 | Intergenic                            |
| chr18 | 60384685 | 60384809 | intron (NM_194449, intron 1 of 16)    |
| chr18 | 60666884 | 60667008 | Intergenic                            |
| chr18 | 61646809 | 61646933 | intron (NM_001031848, intron 2 of 6)  |
| chr18 | 74813386 | 74813510 | intron (NM_001025101, intron 2 of 8)  |

|       |          |          |                                       |
|-------|----------|----------|---------------------------------------|
| chr18 | 74826904 | 74827028 | intron (NM_001025101, intron 1 of 8)  |
| chr19 | 13278300 | 13278424 | Intergenic                            |
| chr19 | 17428319 | 17428443 | intron (NM_024050, intron 4 of 4)     |
| chr19 | 17586487 | 17586611 | intron (NM_198580, intron 1 of 11)    |
| chr19 | 33543374 | 33543498 | intron (NM_033103, intron 1 of 14)    |
| chr19 | 33667751 | 33667875 | Intergenic                            |
| chr19 | 38423101 | 38423225 | intron (NM_015073, intron 1 of 21)    |
| chr19 | 39888459 | 39888583 | 3' UTR (NM_017592, exon 4 of 4)       |
| chr19 | 40450049 | 40450173 | Intergenic                            |
| chr19 | 42696168 | 42696292 | Intergenic                            |
| chr19 | 42954697 | 42954821 | intron (NR_073179, intron 1 of 1)     |
| chr19 | 44669045 | 44669169 | promoter-TSS (NM_001146220)           |
| chr19 | 44711471 | 44711595 | Intergenic                            |
| chr19 | 45004528 | 45004652 | promoter-TSS (NM_013256)              |
| chr19 | 45245341 | 45245465 | Intergenic                            |
| chr19 | 45681686 | 45681810 | promoter-TSS (NM_001270893)           |
| chr19 | 47288111 | 47288235 | promoter-TSS (NM_001145145)           |
| chr19 | 50693952 | 50694076 | Intergenic                            |
| chr19 | 55727940 | 55728064 | Intergenic                            |
| chr19 | 56165183 | 56165307 | promoter-TSS (NM_007279)              |
| chr19 | 57702810 | 57702934 | promoter-TSS (NM_003417)              |
| chr19 | 57791235 | 57791359 | promoter-TSS (NM_006635)              |
| chr20 | 6104082  | 6104206  | promoter-TSS (NM_017671)              |
| chr20 | 9310939  | 9311063  | intron (NM_182797, intron 2 of 35)    |
| chr20 | 30292565 | 30292689 | intron (NM_001191, intron 2 of 2)     |
| chr20 | 30300625 | 30300749 | intron (NM_001191, intron 2 of 2)     |
| chr20 | 30865345 | 30865469 | promoter-TSS (NM_004798)              |
| chr20 | 31053451 | 31053575 | intron (NM_001256798, intron 5 of 10) |
| chr20 | 32254222 | 32254346 | promoter-TSS (NM_001024675)           |
| chr20 | 32321761 | 32321885 | intron (NM_032819, intron 1 of 14)    |
| chr20 | 32377556 | 32377680 | intron (NM_032819, intron 14 of 14)   |
| chr20 | 34674808 | 34674932 | Intergenic                            |
| chr20 | 36007730 | 36007854 | intron (NM_005417, intron 2 of 13)    |
| chr20 | 36772654 | 36772778 | intron (NM_198951, intron 6 of 9)     |
| chr20 | 36796497 | 36796621 | Intergenic                            |
| chr20 | 37063940 | 37064064 | promoter-TSS (NR_015366)              |
| chr20 | 37101243 | 37101367 | promoter-TSS (NM_020336)              |
| chr20 | 39632352 | 39632476 | Intergenic                            |
| chr20 | 41234324 | 41234448 | intron (NM_133170, intron 7 of 31)    |
| chr20 | 43991496 | 43991620 | promoter-TSS (NM_033542)              |
| chr20 | 44486072 | 44486196 | promoter-TSS (NM_005469)              |
| chr20 | 44834846 | 44834970 | intron (NM_021248, intron 7 of 11)    |
| chr20 | 45259931 | 45260055 | intron (NM_001011554, intron 2 of 13) |
| chr20 | 46203807 | 46203931 | intron (NM_006534, intron 1 of 22)    |
| chr20 | 48061833 | 48061957 | intron (NM_004975, intron 1 of 1)     |

|       |          |          |                                        |
|-------|----------|----------|----------------------------------------|
| chr20 | 48307573 | 48307697 | intron (NM_004776, intron 1 of 8)      |
| chr20 | 48381728 | 48381852 | Intergenic                             |
| chr20 | 48410350 | 48410474 | Intergenic                             |
| chr20 | 48854021 | 48854145 | Intergenic                             |
| chr20 | 49040008 | 49040132 | Intergenic                             |
| chr20 | 49345672 | 49345796 | Intergenic                             |
| chr20 | 49378116 | 49378240 | Intergenic                             |
| chr20 | 49575278 | 49575402 | promoter-TSS (NM_014484)               |
| chr20 | 50361245 | 50361369 | intron (NM_006045, intron 1 of 27)     |
| chr20 | 50847057 | 50847181 | Intergenic                             |
| chr20 | 50848126 | 50848250 | Intergenic                             |
| chr20 | 52237980 | 52238104 | Intergenic                             |
| chr20 | 52732434 | 52732558 | Intergenic                             |
| chr20 | 52750078 | 52750202 | Intergenic                             |
| chr20 | 56273324 | 56273448 | intron (NM_199171, intron 1 of 3)      |
| chr20 | 56592816 | 56592940 | Intergenic                             |
| chr20 | 58345621 | 58345745 | intron (NM_080672, intron 5 of 12)     |
| chr20 | 58406129 | 58406253 | intron (NM_080672, intron 8 of 12)     |
| chr20 | 61002690 | 61002814 | promoter-TSS (NM_080833)               |
| chr20 | 61863836 | 61863960 | Intergenic                             |
| chr20 | 62528209 | 62528333 | intron (NM_025219, intron 1 of 4)      |
| chr21 | 43894416 | 43894540 | intron (NM_080860, intron 8 of 8)      |
| chr22 | 21132032 | 21132156 | intron (NM_000185, intron 1 of 4)      |
| chr22 | 21235608 | 21235732 | intron (NM_004782, intron 3 of 4)      |
| chr22 | 21983652 | 21983776 | intron (NM_001017964, intron 2 of 4)   |
| chr22 | 22751611 | 22751735 | Intergenic                             |
| chr22 | 24798603 | 24798727 | intron (NM_001254732, intron 13 of 14) |
| chr22 | 25290692 | 25290816 | intron (NM_001098497, intron 17 of 24) |
| chr22 | 27561134 | 27561258 | Intergenic                             |
| chr22 | 30195309 | 30195433 | intron (NM_032204, intron 15 of 19)    |
| chr22 | 30391138 | 30391262 | intron (NM_153050, intron 7 of 19)     |
| chr22 | 32072918 | 32073042 | Intergenic                             |
| chr22 | 36727605 | 36727729 | intron (NM_002473, intron 3 of 40)     |
| chr22 | 36806135 | 36806259 | Intergenic                             |
| chr22 | 37988569 | 37988693 | Intergenic                             |
| chr22 | 41399136 | 41399260 | Intergenic                             |
| chr22 | 42418606 | 42418730 | intron (NM_152613, intron 5 of 5)      |
| chr22 | 43336369 | 43336493 | intron (NM_001184970, intron 1 of 10)  |
| chr22 | 46035237 | 46035361 | Intergenic                             |
| chr22 | 46084700 | 46084824 | intron (NM_001167621, intron 1 of 10)  |
| chr22 | 46692548 | 46692672 | promoter-TSS (NR_024009)               |
| chr22 | 46786857 | 46786981 | intron (NM_014246, intron 16 of 34)    |
| chr22 | 49895902 | 49896026 | Intergenic                             |
| chrX  | 20534468 | 20534592 | Intergenic                             |
| chrX  | 21992138 | 21992262 | intron (NM_004595, intron 4 of 10)     |

|      |           |           |                                     |
|------|-----------|-----------|-------------------------------------|
| chrX | 64754806  | 64754930  | promoter-TSS (NM_031206)            |
| chrX | 69353707  | 69353831  | 5' UTR (NM_001551, exon 2 of 7)     |
| chrX | 70585688  | 70585812  | promoter-TSS (NM_004606)            |
| chrX | 96415344  | 96415468  | intron (NM_006729, intron 22 of 26) |
| chrX | 134220604 | 134220728 | Intergenic                          |
| chrX | 136007435 | 136007559 | Intergenic                          |



Table S4. List of enriched gene pathways from DAVID gene ontology analysis on nearest genes to EHF ChIP-seq peaks.

| Term                                        | P Value     | Genes                                                                                                                                                                                                                                                                                         |
|---------------------------------------------|-------------|-----------------------------------------------------------------------------------------------------------------------------------------------------------------------------------------------------------------------------------------------------------------------------------------------|
| GO:0016323~basolateral plasma membrane      | 1.05E-04    | ATP1B1, LPP, FERMT1, ITGB4, ACTN1, ITGA2, RHOA, ITGB1, PXN, TNS3, SDC1, LAMA3, CD44, PTK2B, ANK3, SLC2A2, P2RY1, ADAM9                                                                                                                                                                        |
| GO:0070161~anchoring junction               | 1.69E-04    | PARD3, LPP, FERMT1, ITGA2, ACTN1, MYH9, RHOA, ITGB1, PXN, TNS3, SDC1, LAMA3, CD44, PTK2B, PKP4, TJP2                                                                                                                                                                                          |
| GO:0005912~adherens junction                | 1.92E-04    | PARD3, LPP, FERMT1, ITGA2, ACTN1, MYH9, RHOA, ITGB1, PXN, TNS3, SDC1, LAMA3, CD44, PTK2B, TJP2                                                                                                                                                                                                |
| GO:0007155~cell adhesion                    | 1.96E-04    | PPFIA2, PARD3, NRP1, EPDR1, CCR1, ITGB4, FERMT1, KITLG, COL28A1, EDIL3, SOX9, ITGB1, CD2AP, MEGF10, SRC, PXN, PCDHAC2, LAMB3, LGALS3BP, CD44, ROBO1, PTK2B, ITGAV, TGFBI, ADAM9, LPP, COL22A1, NLGN1, ACTN1, ITGA2, PCDH15, PTPRT, CHST4, MYH9, CLDN23, HES1, CD84, LAMA3, CDH18, PKP4, FCGBP |
| GO:0022610~biological adhesion              | 1.96E-04    | PPFIA2, PARD3, NRP1, EPDR1, CCR1, ITGB4, FERMT1, KITLG, COL28A1, EDIL3, SOX9, ITGB1, CD2AP, MEGF10, SRC, PXN, PCDHAC2, LAMB3, LGALS3BP, CD44, ROBO1, PTK2B, ITGAV, TGFBI, ADAM9, LPP, COL22A1, NLGN1, ACTN1, ITGA2, PCDH15, PTPRT, CHST4, MYH9, CLDN23, HES1, CD84, LAMA3, CDH18, PKP4, FCGBP |
| GO:0005925~focal adhesion                   | 2.00E-04    | TNS3, SDC1, LAMA3, CD44, LPP, PTK2B, FERMT1, ITGA2, ACTN1, RHOA, ITGB1, PXN                                                                                                                                                                                                                   |
| GO:0005924~cell-substrate adherens junction | 2.81E-04    | TNS3, SDC1, LAMA3, CD44, LPP, PTK2B, FERMT1, ITGA2, ACTN1, RHOA, ITGB1, PXN                                                                                                                                                                                                                   |
| GO:0030055~cell-substrate junction          | 4.53E-04    | TNS3, SDC1, LAMA3, CD44, LPP, PTK2B, FERMT1, ITGA2, ACTN1, RHOA, ITGB1, PXN                                                                                                                                                                                                                   |
| GO:0007160~cell-matrix adhesion             | 4.76E-04    | PPFIA2, EPDR1, CD44, PTK2B, ITGAV, ITGB4, ITGA2, ACTN1, ITGB1, PXN, ADAM9                                                                                                                                                                                                                     |
| GO:0001568~blood vessel development         | 7.66E-04    | NRP1, IL8, MYO1E, TIPARP, ELK3, MYH9, TCF7L2, SLIT2, ANXA2, DLX3, CXCL17, HIF1A, MYOCD, CD44, ROBO1, PTK2B, ITGAV, TGM2, MKL2                                                                                                                                                                 |
| GO:0001944~vasculature development          | 0.001012849 | NRP1, IL8, MYO1E, TIPARP, ELK3, MYH9, TCF7L2, SLIT2, ANXA2, DLX3,                                                                                                                                                                                                                             |

|                                                                             |             |                                                                                                                                                                                                                                                                                                                                                                                                                                                                                                   |
|-----------------------------------------------------------------------------|-------------|---------------------------------------------------------------------------------------------------------------------------------------------------------------------------------------------------------------------------------------------------------------------------------------------------------------------------------------------------------------------------------------------------------------------------------------------------------------------------------------------------|
|                                                                             |             | CXCL17, HIF1A, MYOCD, CD44, ROBO1, PTK2B, ITGAV, TGM2, MKL2                                                                                                                                                                                                                                                                                                                                                                                                                                       |
| GO:0031589~cell-substrate adhesion                                          | 0.001020184 | PPFIA2, EPDR1, CD44, PTK2B, ITGAV, ITGB4, ITGA2, ACTN1, ITGB1, PXN, ADAM9                                                                                                                                                                                                                                                                                                                                                                                                                         |
| GO:0030155~regulation of cell adhesion                                      | 0.001299169 | KNG1, GTPBP4, IL8, ITGA2, SMAD3, EDIL3, SRC, LAMA3, TGFBI, TGM2, NRG1, PIK3R1, ADAM9                                                                                                                                                                                                                                                                                                                                                                                                              |
| GO:0042995~cell projection                                                  | 0.001384726 | PARD3, NRP1, ADORA2A, FERMT1, TTLL6, RDX, ITGB1, CD2AP, RHOU, PXN, MBP, SPAG16, ROBO1, ANK3, ATXN10, PTK2B, SLC2A2, SYNJ2, FGD6, CLN3, MAP1B, FSCN1, SLC34A1, ACTN1, ITGA2, PCDH15, MYH9, SDC1, HIF1A, TXNDC2, RASGRF1, GRM7, MYH14, LIPC, ATP6V0A4, HTR2A                                                                                                                                                                                                                                        |
| GO:0032403~protein complex binding                                          | 0.001823318 | YWHAZ, BCKDHB, MAP1B, ACTN1, ITGA2, EDIL3, CD2AP, ITGB1, LAMB3, PTK2B, SLC2A2, TGFBI, PTPN1, PIK3R1, ADAM9, HTR2A                                                                                                                                                                                                                                                                                                                                                                                 |
| GO:0005794~Golgi apparatus                                                  | 0.001899271 | SLC9A8, GALNT7, LITAF, HS3ST1, RHOU, ST3GAL1, TRAPPC6A, SERINC5, CD44, ANK3, XYLT1, MCCC1, B3GNT6, B4GALNT3, PDGFD, RAB27B, RNF122, FGD6, B4GALT5, SYS1, MGAT4A, CLN3, SYNRG, SCAMP2, GOLT1A, CTLA4, GOLIM4, CHST4, FZD5, ERGIC1, GCC2, ERGIC2, ST6GALNAC1, SACM1L, PJA2, NCOA3, CHSY3, CXCL14, CHSY1, MAP6, TMC01, COG2                                                                                                                                                                          |
| GO:0007169~transmembrane receptor protein tyrosine kinase signaling pathway | 0.001973595 | NRP1, FIBP, ADORA2A, PTPN2, MYO1E, TIPARP, PTPRT, SRC, PXN, MUSK, EPHA6, EPS8, PTK2B, ROR1, PTPN1, NRG1, PIK3R1                                                                                                                                                                                                                                                                                                                                                                                   |
| GO:0044459~plasma membrane part                                             | 0.002724782 | SLC27A1, ATP1B1, KCNC4, SLC15A2, FERMT1, RHOU, MBP, SLC1A5, KCNQ3, ATP2B4, CD44, ANK3, ROBO1, SLC2A2, IL1RAP, ATP8B1, SYNJ2, NRG1, ADAM9, RAP2B, CLN3, PTPRH, SLC34A1, TANC1, ACTN1, PIGR, CD40, MMP15, MYH9, HLA-E, PJA2, CD84, TNS3, NPC1, SDC1, GRM7, ROR1, HAS2, EFNA5, TM4SF1, SLC40A1, SERP1, SNAP29, SNX18, PARD3, LITAF, ADORA2A, STAM2, CCR1, ITGB4, DAG1, NOSTRIN, RDX, BCL2L1, ITGB1, PXN, PCDHAC2, SRC, MUSK, PTK2B, ITGAV, P2RY1, IFT140, MICALL2, PARD6B, PTPRD, TM2D1, LPP, KCNB1, |

|                                                                                 |             |                                                                                                                                                                                   |
|---------------------------------------------------------------------------------|-------------|-----------------------------------------------------------------------------------------------------------------------------------------------------------------------------------|
|                                                                                 |             | NLGN1, CTLA4, ITGA2, FZD5, KCNK2, CLDN23, EPHA6, LAMA3, SLC17A3, EPS8, PKP4, RHEB, SLC13A3, PTPN1, ATP6V0A4, TJP2, COG2, HTR2A                                                    |
| GO:0007167~enzyme linked receptor protein signaling pathway                     | 0.002792907 | PTPRD, NRP1, LTBP2, FIBP, ADORA2A, PTPN2, MYO1E, TIPARP, SMAD3, PTPRT, PXN, SRC, MUSK, EPHA6, EPS8, PTK2B, ROR1, PTPN1, NRG1, PIK3R1, ADAM9, TOB1                                 |
| GO:0022604~regulation of cell morphogenesis                                     | 0.002846393 | NRP1, ROBO1, FYN, CDC42SE2, MAP1B, SMAD3, MYH14, MYH9, FGD6, RHOU, SLIT2, MBP                                                                                                     |
| GO:0040012~regulation of locomotion                                             | 0.003062075 | PARD6B, GTPBP4, IL8, ADORA2A, SMAD3, ITGA2, SLIT2, TRIB1, HIF1A, LAMA3, PTK2B, HDAC9, IGFBP3, PIK3R1, ADAM9                                                                       |
| GO:0030030~cell projection organization                                         | 0.003085777 | PARD6B, PARD3, NRP1, ADORA2A, MAP1B, ITGB4, RDX, MYH9, LPIN1, CD2AP, SLIT2, SPAG16, HOXA1, CD44, ROBO1, ANK3, RASGRF1, UNC5A, PTK2B, ATXN10, EFNA5, SIAH1, FGD6                   |
| GO:0051270~regulation of cell motion                                            | 0.003209554 | PARD6B, GTPBP4, PARD3, NRP1, SMAD3, ITGA2, ACTN1, TRIB1, HIF1A, LAMA3, PTK2B, HDAC9, IGFBP3, PIK3R1, ADAM9                                                                        |
| GO:0045944~positive regulation of transcription from RNA polymerase II promoter | 0.003444251 | TAF1, GLIS3, HNF1B, CEBPB, EVX1, ARNT2, SMAD3, SOX6, MECOM, SOX9, TCF7L2, AHR, ZBTB38, GTF2H1, HES1, HOXA1, HIF1A, PAX9, MYOCD, BCL3, MKL2, ARHGEF10L, NFIB                       |
| GO:0043534~blood vessel endothelial cell migration                              | 0.004236743 | ROBO1, PTK2B, MYH9, SLIT2                                                                                                                                                         |
| GO:0016202~regulation of striated muscle tissue development                     | 0.004633076 | MUSK, MYOCD, SMAD3, MKL2, NRG1, HDAC9, IGFBP3                                                                                                                                     |
| GO:0014069~postsynaptic density                                                 | 0.00475887  | PJA2, YWHAZ, EPS8, ADORA2A, PTK2B, MAP1B, TANC1, NLGN1                                                                                                                            |
| GO:0048634~regulation of muscle development                                     | 0.005114568 | MUSK, MYOCD, SMAD3, MKL2, NRG1, HDAC9, IGFBP3                                                                                                                                     |
| GO:0048514~blood vessel morphogenesis                                           | 0.007078888 | NRP1, IL8, MYO1E, TIPARP, ELK3, MYH9, SLIT2, ANXA2, CXCL17, HIF1A, MYOCD, PTK2B, ROBO1, TGM2, MKL2                                                                                |
| GO:0045893~positive regulation of transcription, DNA-dependent                  | 0.009089526 | GLIS3, HNF1B, EVX1, ARNT2, SOX6, SOX9, TCF7L2, ZBTB38, HOXA1, MYOCD, PAX9, BCL3, MKL2, ARHGEF10L, ATF7IP, TAF1, CEBPB, ESRRG, SMAD3, MECOM, AHR, GTF2H1, HES1, HIF1A, NCOA3, NFIB |
| GO:0044463~cell projection part                                                 | 0.009440116 | PARD3, ADORA2A, SLC34A1, ITGA2, TTLL6, ITGB1, SPAG16, MBP, TXNDC2,                                                                                                                |

|                                                           |             |                                                                                                                                                                                                                                                          |
|-----------------------------------------------------------|-------------|----------------------------------------------------------------------------------------------------------------------------------------------------------------------------------------------------------------------------------------------------------|
|                                                           |             | ROBO1, SLC2A2, GRM7, SYNJ2, ATP6V0A4, HTR2A                                                                                                                                                                                                              |
| GO:0008305~integrin complex                               | 0.009782397 | ITGAV, ITGB4, ITGA2, MYH9, ITGB1                                                                                                                                                                                                                         |
| GO:0006897~endocytosis                                    | 0.009861124 | MICALL2, CLN3, SYNRG, ADORA2A, LRP1B, NOSTRIN, MEGF10, ELMO1, NPC1, LRP10, CDC42SE2, PACSIN2, ITGAV, LRP3, LRP5                                                                                                                                          |
| GO:0010324~membrane invagination                          | 0.009861124 | MICALL2, CLN3, SYNRG, ADORA2A, LRP1B, NOSTRIN, MEGF10, ELMO1, NPC1, LRP10, CDC42SE2, PACSIN2, ITGAV, LRP3, LRP5                                                                                                                                          |
| GO:0001701~in utero embryonic development                 | 0.009862249 | HNF1B, CEBPB, MYO1E, ARNT2, BCL2L1, CAPN2, MECOM, MYH9, ITGB1, HES1, PCGF2, HIF1A, MKL2                                                                                                                                                                  |
| GO:0005089~Rho guanyl-nucleotide exchange factor activity | 0.009972872 | MCF2L2, PLEKHG3, RASGRF1, PLEKHG6, FGD6, SPATA13, ARHGEF10L, FARP2                                                                                                                                                                                       |
| GO:0051254~positive regulation of RNA metabolic process   | 0.010143422 | GLIS3, HNF1B, EVX1, ARNT2, SOX6, SOX9, TCF7L2, ZBTB38, HOXA1, MYOCD, PAX9, BCL3, MKL2, ARHGEF10L, ATF7IP, TAF1, CEBPB, ESRRG, SMAD3, MECOM, AHR, GTF2H1, HES1, HIF1A, NCOA3, NFIB                                                                        |
| GO:0045785~positive regulation of cell adhesion           | 0.011231173 | TGM2, SMAD3, ITGA2, EDIL3, NRG1, SRC, ADAM9                                                                                                                                                                                                              |
| GO:0008219~cell death                                     | 0.011657382 | PHLPP1, SPG7, LITAF, ADORA2A, EGLN3, BCL2L1, STK17A, SYCP2, CRADD, TOP1, TMEM173, ATXN10, PTK2B, UNC5A, TGM2, DEDD2, PHLDA1, CLN3, TM2D1, PTPRH, BIRC7, SMAD3, CD5L, GAN, AHR, ELMO1, VDAC1, SLTM, RNF130, RASGRF1, TNFAIP8, ERN2, SIAH1, SLC5A11, HTR2A |
| GO:0009100~glycoprotein metabolic process                 | 0.011686764 | MGAT4A, CLN3, GALNT7, DCN, PMM2, ST6GALNAC1, ST3GAL1, HIF1A, B3GNT6, LIPC, UGGT1, SERP1, COG2, PHLDA1                                                                                                                                                    |
| GO:0031253~cell projection membrane                       | 0.011947783 | ADORA2A, ROBO1, SLC2A2, SLC34A1, SYNJ2, ATP6V0A4, ITGB1                                                                                                                                                                                                  |
| GO:0040017~positive regulation of locomotion              | 0.012082288 | HIF1A, IL8, PTK2B, SMAD3, ITGA2, HDAC9, SLIT2, PIK3R1, ADAM9                                                                                                                                                                                             |
| GO:0016265~death                                          | 0.012656501 | PHLPP1, SPG7, LITAF, ADORA2A, EGLN3, BCL2L1, STK17A, SYCP2, CRADD, TOP1, TMEM173, ATXN10, PTK2B, UNC5A, TGM2, DEDD2, PHLDA1, CLN3, TM2D1, PTPRH, BIRC7, SMAD3, CD5L, GAN, AHR, ELMO1, VDAC1, SLTM, RNF130,                                               |

|                                                                    |             |                                                                                                                                                                                                                                                                                                                        |
|--------------------------------------------------------------------|-------------|------------------------------------------------------------------------------------------------------------------------------------------------------------------------------------------------------------------------------------------------------------------------------------------------------------------------|
|                                                                    |             | RASGRF1, TNFAIP8, ERN2, SIAH1, SLC5A11, HTR2A                                                                                                                                                                                                                                                                          |
| GO:0007172~signal complex assembly                                 | 0.012794399 | MUSK, PTK2B, SRC, PXN                                                                                                                                                                                                                                                                                                  |
| GO:0035023~regulation of Rho protein signal transduction           | 0.012795437 | MCF2L2, PLEKHG3, PTK2B, RASGRF1, PLEKHG6, FGD6, SPATA13, ARHGEF10L, FARP2                                                                                                                                                                                                                                              |
| GO:0008092~cytoskeletal protein binding                            | 0.01327088  | ADORA2A, RDX, PXN, PACSIN2, PLS1, MKL2, KLHL20, PHACTR3, MYO1B, MYO1E, ENC1, FSCN1, MAP1B, ACTN1, PTPRT, MYH9, CAPN2, COTL1, ANXA2, JMY, FARP2, ARPC1B, SDC1, EPB41L1, FYN, MYH14, MAP6                                                                                                                                |
| GO:0051056~regulation of small GTPase mediated signal transduction | 0.013825188 | AGFG2, RALGAPB, SIPA1L3, ADAP1, FARP2, MCF2L2, PLEKHG3, PTK2B, RASGRF1, PLEKHG6, AGAP1, SPATA13, FGD6, ARHGEF10L, IQSEC1, RASA2                                                                                                                                                                                        |
| GO:0006796~phosphate metabolic process                             | 0.015000023 | HUS1, STK17A, SRC, TRIB1, SGK223, TOP1, MUSK, UQCR10, CLK3, PTK2B, EEF2K, SYNJ2, GK5, PRKACB, PIK3R1, AKT3, ADAM9, TAF1, PTPRD, TNIK, NCEH1, PTPN2, PHKG2, PTPRH, BIRC7, PRKCH, PTPRT, PTPN12, SACM1L, RPS6KA3, EPHA6, PLK2, SLC17A3, FYN, RPS6KA2, RSRC1, NDUFV2, ROR1, ERN2, PTPN1, IKBKB, ATP6V0A4, MAP3K13, IGFBP3 |
| GO:0006793~phosphorus metabolic process                            | 0.015000023 | HUS1, STK17A, SRC, TRIB1, SGK223, TOP1, MUSK, UQCR10, CLK3, PTK2B, EEF2K, SYNJ2, GK5, PRKACB, PIK3R1, AKT3, ADAM9, TAF1, PTPRD, TNIK, NCEH1, PTPN2, PHKG2, PTPRH, BIRC7, PRKCH, PTPRT, PTPN12, SACM1L, RPS6KA3, EPHA6, PLK2, SLC17A3, FYN, RPS6KA2, RSRC1, NDUFV2, ROR1, ERN2, PTPN1, IKBKB, ATP6V0A4, MAP3K13, IGFBP3 |
| GO:0006928~cell motion                                             | 0.015386213 | NRP1, KITLG, CD2AP, ITGB1, SRC, HOXA1, CD44, PTK2B, UNC5A, ANK3, ROBO1, IL8, BARHL1, ITGA2, CHST4, MYH9, SLIT2, ELMO1, TNS3, ARPC1B, HIF1A, FYN, SIAH1, EFNA5, LRP5                                                                                                                                                    |
| GO:0031175~neuron projection development                           | 0.015705291 | PARD6B, PARD3, NRP1, ADORA2A, MAP1B, SLIT2, HOXA1, CD44, UNC5A, PTK2B, ATXN10, RASGRF1, ANK3, ROBO1, EFNA5, SIAH1                                                                                                                                                                                                      |
| GO:0051153~regulation of striated muscle cell differentiation      | 0.01736305  | MUSK, MYOCD, NRG1, HDAC9, IGFBP3                                                                                                                                                                                                                                                                                       |
| GO:0042060~wound healing                                           | 0.017889119 | KNG1, ADORA2A, ITGA2, SMAD3,                                                                                                                                                                                                                                                                                           |

|                                                                                   |             |                                                                                                                                                                                                                                                                                                                                                           |
|-----------------------------------------------------------------------------------|-------------|-----------------------------------------------------------------------------------------------------------------------------------------------------------------------------------------------------------------------------------------------------------------------------------------------------------------------------------------------------------|
|                                                                                   |             | CD40, ELK3, SDC1, HIF1A, CD44, P2RY1, TFPI, SERPIND1, NRG1                                                                                                                                                                                                                                                                                                |
| GO:0030334~regulation of cell migration                                           | 0.018059128 | PARD6B, GTPBP4, HIF1A, LAMA3, PTK2B, SMAD3, ITGA2, HDAC9, IGFBP3, PIK3R1, ADAM9, TRIB1                                                                                                                                                                                                                                                                    |
| GO:0046982~protein heterodimerization activity                                    | 0.018300342 | HNF1B, JDP2, CEBPB, ADORA2A, ARNT2, ITGA2, SOX6, BCL2L1, SYCP2, ITGB1, PDSS2, HIF1A, ROBO1, IKBKB                                                                                                                                                                                                                                                         |
| GO:0012501~programmed cell death                                                  | 0.018464029 | PHLPP1, LITAF, ADORA2A, EGLN3, BCL2L1, STK17A, SYCP2, CRADD, TOP1, TMEM173, PTK2B, UNC5A, TGM2, DEDD2, PHLDA1, TM2D1, PTPRH, BIRC7, SMAD3, CD5L, AHR, ELMO1, VDAC1, SLTM, RNF130, RASGRF1, TNFAIP8, ERN2, SIAH1, SLC5A11                                                                                                                                  |
| GO:0015937~coenzyme A biosynthetic process                                        | 0.018705343 | COASY, PANK3, PPCDC                                                                                                                                                                                                                                                                                                                                       |
| GO:0060260~regulation of transcription initiation from RNA polymerase II promoter | 0.018705343 | ATF7IP, TAF1, AHR                                                                                                                                                                                                                                                                                                                                         |
| GO:0030054~cell junction                                                          | 0.018931343 | SNAP29, PARD3, FERMT1, RHOU, ITGB1, PXN, CD44, PTK2B, IFT140, MICALL2, PARD6B, LPP, TANC1, NLGN1, ACTN1, ITGA2, MYH9, CLDN23, PJA2, TNS3, SDC1, LAMA3, PKP4, SLC13A3, TJP2                                                                                                                                                                                |
| GO:0030424~axon                                                                   | 0.019133871 | NRP1, ADORA2A, ROBO1, PTK2B, ANK3, GRM7, MAP1B, SYNJ2, ITGA2, MYH14, MBP                                                                                                                                                                                                                                                                                  |
| GO:0031226~intrinsic to plasma membrane                                           | 0.021107558 | KCNC4, ATP1B1, SLC15A2, SLC1A5, ATP2B4, KCNQ3, CD44, ROBO1, SLC2A2, IL1RAP, ATP8B1, ADAM9, PTPRH, SLC34A1, MMP15, CD40, PIGR, MYH9, CD84, SDC1, NPC1, GRM7, ROR1, HAS2, EFNA5, TM4SF1, SLC40A1, PARD3, ADORA2A, CCR1, DAG1, ITGB4, ITGB1, PCDHAC2, MUSK, ITGAV, P2RY1, PTPRD, TM2D1, KCNB1, CTLA4, NLGN1, ITGA2, FZD5, KCNK2, EPHA6, EPS8, SLC17A3, HTR2A |
| GO:0000139~Golgi membrane                                                         | 0.021720628 | SYS1, ST3GAL1, CLN3, SYNRG, SCAMP2, CHSY3, B4GALNT3, CHST4, CHSY1, PDGFD, ST6GALNAC1, COG2                                                                                                                                                                                                                                                                |
| GO:0000904~cell morphogenesis involved in differentiation                         | 0.022648664 | PARD6B, PARD3, NRP1, MAP1B, MYH9, SOX9, SLIT2, HES1, HOXA1, HIF1A, UNC5A, ANK3, ROBO1, EFNA5, SIAH1                                                                                                                                                                                                                                                       |

|                                                                                 |             |                                                                                                                                                                                                                    |
|---------------------------------------------------------------------------------|-------------|--------------------------------------------------------------------------------------------------------------------------------------------------------------------------------------------------------------------|
| GO:0019904~protein domain specific binding                                      | 0.022894596 | RAP2B, YWHAZ, USP8, LITAF, ESRRG, CD2AP, CRADD, SRC, PTPN12, ELMO1, SH3BP5, WBP2NL, GRM7, TFD2, TGM2, SYNJ2, ETV6, PMEPA1, ADAM9                                                                                   |
| GO:0005088~Ras guanyl-nucleotide exchange factor activity                       | 0.0240104   | MCF2L2, PLEKHG3, RASGRF1, PLEKHG6, FGD6, SPATA13, ARHGEF10L, FARP2                                                                                                                                                 |
| GO:0016601~Rac protein signal transduction                                      | 0.024426122 | RHOA, ELMO1, FARP2                                                                                                                                                                                                 |
| GO:0001666~response to hypoxia                                                  | 0.025807195 | ATP1B1, HIF1A, PTK2B, ARNT2, PDE5A, EGLN3, SMAD3, ITGA2, BCL2L1, CAPN2                                                                                                                                             |
| GO:0016192~vesicle-mediated transport                                           | 0.025860359 | SNAP29, YWHAZ, ATL2, ADORA2A, MARCKSL1, NOSTRIN, MEGF10, SRC, TRAPPC6A, PACSIN2, ITGAV, MICALL2, CLN3, SYNRG, SCAMP2, GOLT1A, LRP1B, NLGN1, SCRIN1, ERGIC1, ERGIC2, ELMO1, NPC1, LRP10, CDC42SE2, LRP3, COG2, LRP5 |
| GO:0005085~guanyl-nucleotide exchange factor activity                           | 0.026281666 | MCF2L2, PLEKHG3, RASGRF1, PLEKHG6, FGD6, SPATA13, ARHGEF10L, IQSEC1, FARP2, EIF2B5, BCAR3                                                                                                                          |
| GO:0008360~regulation of cell shape                                             | 0.027044274 | FYN, CDC42SE2, MYH14, MYH9, FGD6, RHOA                                                                                                                                                                             |
| GO:0032580~Golgi cisterna membrane                                              | 0.027095995 | CHSY3, B4GALNT3, CHSY1                                                                                                                                                                                             |
| GO:0009101~glycoprotein biosynthetic process                                    | 0.027888166 | ST3GAL1, MGAT4A, GALNT7, B3GNT6, LIPC, UGGT1, PMM2, ST6GALNAC1, PHLDA1, COG2, SERP1                                                                                                                                |
| GO:0005518~collagen binding                                                     | 0.028324249 | CD44, SMAD3, ITGA2, DCN, ADAM9                                                                                                                                                                                     |
| GO:0016337~cell-cell adhesion                                                   | 0.028637306 | PARD3, NLGN1, PTPRT, PCDH15, MYH9, SOX9, CD2AP, ITGB1, CLDN23, SRC, PCDHAC2, CD84, CD44, ROBO1, CDH18, ADAM9                                                                                                       |
| GO:0016477~cell migration                                                       | 0.028637306 | NRP1, IL8, BARHL1, KITLG, MYH9, CD2AP, ITGB1, SRC, SLIT2, TNS3, HIF1A, CD44, PTK2B, FYN, ROBO1, LRP5                                                                                                               |
| GO:0010551~regulation of specific transcription from RNA polymerase II promoter | 0.028717249 | HES1, TAF1, EVX1, MYOCD, SMAD3, HDAC9, TCF7L2, ARHGEF10L                                                                                                                                                           |
| GO:0031256~leading edge membrane                                                | 0.028912335 | ADORA2A, ROBO1, SYNJ2, ITGB1                                                                                                                                                                                       |
| GO:0032101~regulation of response to external stimulus                          | 0.028960609 | KNG1, CLN3, NPC1, UACA, IL8, ADORA2A, TGM2, SMAD3, ITGA2, SLIT2, ANXA2                                                                                                                                             |
| GO:0043542~endothelial cell migration                                           | 0.030623979 | ROBO1, PTK2B, MYH9, SLIT2                                                                                                                                                                                          |
| GO:0015936~coenzyme A metabolic                                                 | 0.030759116 | COASY, PANK3, PPCDC                                                                                                                                                                                                |

|                                                                                          |             |                                                                                                                                                                                                                                                                                                                                                                                                                                                                                                                                                                                                                                                                        |
|------------------------------------------------------------------------------------------|-------------|------------------------------------------------------------------------------------------------------------------------------------------------------------------------------------------------------------------------------------------------------------------------------------------------------------------------------------------------------------------------------------------------------------------------------------------------------------------------------------------------------------------------------------------------------------------------------------------------------------------------------------------------------------------------|
| process                                                                                  |             |                                                                                                                                                                                                                                                                                                                                                                                                                                                                                                                                                                                                                                                                        |
| GO:0001822~kidney development                                                            | 0.031726705 | ODC1, HNF1B, SDC1, CD44, MYO1E, SALL1, TIPARP, SLIT2                                                                                                                                                                                                                                                                                                                                                                                                                                                                                                                                                                                                                   |
| GO:0045202~synapse                                                                       | 0.032131543 | SNAP29, CLN3, YWHAZ, ADORA2A, MAP1B, TANC1, NLGN1, PCDH15, MYH9, ITGB1, PJA2, MUSK, EPS8, PTK2B, ANK3, GRM7, SIAH1, SLC40A1                                                                                                                                                                                                                                                                                                                                                                                                                                                                                                                                            |
| GO:0010552~positive regulation of specific transcription from RNA polymerase II promoter | 0.033198228 | HES1, TAF1, MYOCD, SMAD3, TCF7L2, ARHGEF10L                                                                                                                                                                                                                                                                                                                                                                                                                                                                                                                                                                                                                            |
| GO:0051147~regulation of muscle cell differentiation                                     | 0.033477256 | MUSK, MYOCD, NRG1, HDAC9, IGFBP3                                                                                                                                                                                                                                                                                                                                                                                                                                                                                                                                                                                                                                       |
| GO:0046578~regulation of Ras protein signal transduction                                 | 0.03411645  | AGFG2, FARP2, ADAP1, MCF2L2, PLEKHG3, PTK2B, RASGRF1, PLEKHG6, AGAP1, FGD6, SPATA13, IQSEC1, ARHGEF10L                                                                                                                                                                                                                                                                                                                                                                                                                                                                                                                                                                 |
| GO:0070482~response to oxygen levels                                                     | 0.034264191 | ATP1B1, HIF1A, PTK2B, ARNT2, PDE5A, EGLN3, SMAD3, ITGA2, BCL2L1, CAPN2                                                                                                                                                                                                                                                                                                                                                                                                                                                                                                                                                                                                 |
| GO:0045727~positive regulation of translation                                            | 0.034416965 | PTK2B, BCL3, ITGA2, EIF2B5                                                                                                                                                                                                                                                                                                                                                                                                                                                                                                                                                                                                                                             |
| GO:0043228~non-membrane-bounded organelle                                                | 0.034910923 | KIFC1, HNF1B, HINT1, FERMT1, TTLL6, RPL22L1, CD2AP, RHOU, GTSE1, SPAG16, EBNA1BP2, TOP1, RBM4B, PCGF2, ANK3, SYNJ2, DDX21, DEDD2, KLHL20, OXR1, MRPL52, KRR1, GTPBP4, HIST1H1A, BARHL1, ENC1, TANC1, ACTN1, LAS1L, GAN, MYH9, HMGA2, ELMO1, FARP2, PJA2, TNS3, ARPC1B, RFC3, EPB41L1, WBP2NL, HIF1A, IGBP1, MRO, DYNLRB2, SERP1, YWHAZ, PARD3, LITAF, ADORA2A, DAG1, KITLG, NOSTRIN, RDX, ELK3, SOX9, SYCP2, RPA4, PXN, TFAM, DDX47, WDR55, PTK2B, PLEKHG6, ETV6, FGD6, PHLDA1, NMD3, MICALL2, RPS10P7, CENPN, TAF1, KIF3B, TRIP4, EPPK1, MYO1B, MYO1E, MAP1B, FSCN1, NLGN1, KY, PCDH15, COTL1, RPS6, VDAC1, UACA, EPS8, CDC42SE2, RPS6KA2, SLC13A3, MYH14, MAP6, NFIB |
| GO:0043232~intracellular non-membrane-bounded organelle                                  | 0.034910923 | KIFC1, HNF1B, HINT1, FERMT1, TTLL6, RPL22L1, CD2AP, RHOU, GTSE1, SPAG16, EBNA1BP2, TOP1, RBM4B, PCGF2, ANK3, SYNJ2, DDX21, DEDD2, KLHL20, OXR1, MRPL52, KRR1, GTPBP4, HIST1H1A, BARHL1,                                                                                                                                                                                                                                                                                                                                                                                                                                                                                |



|                                                                                                         |             |                                                                                                                                                                                                                                                                                                                                                                                                                                                                                                                                                                                                                                                                                                                                                                                                              |
|---------------------------------------------------------------------------------------------------------|-------------|--------------------------------------------------------------------------------------------------------------------------------------------------------------------------------------------------------------------------------------------------------------------------------------------------------------------------------------------------------------------------------------------------------------------------------------------------------------------------------------------------------------------------------------------------------------------------------------------------------------------------------------------------------------------------------------------------------------------------------------------------------------------------------------------------------------|
|                                                                                                         |             | ENC1, TANC1, ACTN1, LAS1L, GAN, MYH9, HMGA2, ELMO1, FARP2, PJA2, TNS3, ARPC1B, RFC3, EPB41L1, WBP2NL, HIF1A, IGBP1, MRO, DYNLRB2, SERP1, YWHAZ, PARD3, LITAF, ADORA2A, DAG1, KITLG, NOSTRIN, RDX, ELK3, SOX9, SYCP2, RPA4, PXN, TFAM, DDX47, WDR55, PTK2B, PLEKHG6, ETV6, FGD6, PHLDA1, NMD3, MICALL2, RPS10P7, CENPN, TAF1, KIF3B, TRIP4, EPPK1, MYO1B, MYO1E, MAP1B, FSCN1, NLGN1, KY, PCDH15, COTL1, RPS6, VDAC1, UACA, EPS8, CDC42SE2, RPS6KA2, SLC13A3, MYH14, MAP6, NFIB                                                                                                                                                                                                                                                                                                                               |
| GO:0042692~muscle cell differentiation                                                                  | 0.037332331 | SDC1, MUSK, MKL2, SOX6, MYH9, NRG1, CAPN2, ITGB1, TCF7L2                                                                                                                                                                                                                                                                                                                                                                                                                                                                                                                                                                                                                                                                                                                                                     |
| GO:0045935~positive regulation of nucleobase, nucleoside, nucleotide and nucleic acid metabolic process | 0.038140134 | GLIS3, HNF1B, EVX1, ADORA2A, ARNT2, KITLG, SOX6, SOX9, TCF7L2, ZBTB38, HOXA1, MYOCD, PAX9, BCL3, MKL2, ARHGEF10L, ATF7IP, TAF1, CEBPB, ESRRG, SMAD3, CD40, MECOM, AHR, GTF2H1, HES1, HIF1A, NCOA3, NFIB                                                                                                                                                                                                                                                                                                                                                                                                                                                                                                                                                                                                      |
| GO:0005886~plasma membrane                                                                              | 0.039892056 | QRFPR, ATP1B1, KCNC4, MEGF10, CD2AP, ATP2B4, CD44, ANK3, UNC5A, ROBO1, SLC2A2, DNAJC5, ADAM9, PTPRH, SLC34A1, TANC1, ACTN1, PTPRT, CD40, HLA-E, MYH9, TNS3, NPC1, OR4E2, RASGRF1, ROR1, TFPI, EFNA5, HAS2, PSCA, SLC40A1, LITAF, ADORA2A, STAM2, DAG1, ITGB4, NOSTRIN, BCL2L1, ITGB1, PXN, SRC, PCDHAC2, ADAP1, MUSK, ITGAV, P2RY1, IFT140, ADAM28, PARD6B, TM2D1, LPP, KCNB1, FSCN1, OR4B1, SMAD3, ITGA2, PCDH15, KCNK2, VDAC1, EPHA6, LAMA3, EPS8, CDC42SE2, PKP4, RHEB, SLC13A3, PTPN1, SLC27A1, GPR84, NRP1, SLC15A2, MARCKSL1, FERMT1, CXCR1, RHOU, MBP, FCRL3, SLC1A5, TMEM173, KCNQ3, IL1RAP, ATP8B1, SYNJ2, NRG1, RAP2B, CLN3, PRKCH, PIGR, MMP15, SLIT2, ELMO1, CD84, PJA2, SDC1, EPB41L1, GRM7, TM4SF1, PMEPA1, SERP1, SNAP29, ALPL, SNX18, PARD3, CCR1, KITLG, RDX, PTK2B, TGM2, SUCNR1, MICALL2, |

|                                                                      |             |                                                                                                                                                                                                                         |
|----------------------------------------------------------------------|-------------|-------------------------------------------------------------------------------------------------------------------------------------------------------------------------------------------------------------------------|
|                                                                      |             | PTPRD, MAP1B, NLGN1, CTLA4, OR9G4, FZD5, CAPN2, CLDN23, ANXA2, SLC17A3, GPR110, FYN, PLSCR2, CDH18, ATP6V0A4, TJP2, COG2, HTR2A                                                                                         |
| GO:0010557~positive regulation of macromolecule biosynthetic process | 0.039909575 | GLIS3, HNF1B, EVX1, ARNT2, KITLG, SOX6, SOX9, TCF7L2, ZBTB38, HOXA1, MYOCD, PAX9, PTK2B, BCL3, MKL2, ARHGEF10L, EIF2B5, ATF7IP, TAF1, CEBPB, ESRRG, SMAD3, ITGA2, MECOM, AHR, GTF2H1, HES1, HIF1A, NCOA3, NFIB          |
| GO:0048666~neuron development                                        | 0.040151834 | PARD6B, PARD3, NRP1, ADORA2A, MAP1B, SLIT2, FARP2, HES1, HOXA1, CD44, ROBO1, UNC5A, PTK2B, ATXN10, RASGRF1, ANK3, EFNA5, SIAH1                                                                                          |
| GO:0006915~apoptosis                                                 | 0.041031558 | PHLPP1, LITAF, ADORA2A, EGLN3, STK17A, BCL2L1, SYCP2, CRADD, TMEM173, PTK2B, UNC5A, DEDD2, PHLDA1, TM2D1, PTPRH, BIRC7, SMAD3, CD5L, AHR, ELMO1, VDAC1, SLTM, RNF130, RASGRF1, TNFAIP8, ERN2, SIAH1, SLC5A11            |
| GO:0005178~integrin binding                                          | 0.041951636 | TGFBI, ITGA2, ACTN1, EDIL3, ITGB1, ADAM9                                                                                                                                                                                |
| GO:0030029~actin filament-based process                              | 0.04199523  | MYO1E, FSCN1, ACTN1, MYH9, RHOU, LPIN1, ITGB1, ELMO1, EPB41L1, EPS8, PTK2B, PACSIN2, MYH14, FGD6                                                                                                                        |
| GO:0048742~regulation of skeletal muscle fiber development           | 0.042693491 | MUSK, MYOCD, HDAC9, IGFBP3                                                                                                                                                                                              |
| GO:0031328~positive regulation of cellular biosynthetic process      | 0.042752064 | GLIS3, HNF1B, EVX1, ADORA2A, ARNT2, KITLG, SOX6, SOX9, TCF7L2, ZBTB38, HOXA1, MYOCD, PAX9, PTK2B, BCL3, MKL2, ARHGEF10L, EIF2B5, ATF7IP, TAF1, CEBPB, ESRRG, SMAD3, ITGA2, MECOM, AHR, GTF2H1, HES1, HIF1A, NCOA3, NFIB |
| GO:0001525~angiogenesis                                              | 0.044462342 | CXCL17, NRP1, HIF1A, IL8, ROBO1, PTK2B, ELK3, MYH9, SLIT2, ANXA2                                                                                                                                                        |
| GO:0033865~nucleoside bisphosphate metabolic process                 | 0.045087736 | COASY, PANK3, PPCDC                                                                                                                                                                                                     |
| GO:0048471~perinuclear region of cytoplasm                           | 0.045111291 | GTPBP4, UPF2, RHPN2, MAP1B, CTLA4, ITGA2, CD2AP, ANXA2, NPC1, UACA, WBP2NL, PTK2B, ATXN10, SYNJ2, RASA2                                                                                                                 |
| GO:0005795~Golgi stack                                               | 0.045643457 | CLN3, CHSY3, B4GALNT3, CHSY1, COG2                                                                                                                                                                                      |
| GO:0005887~integral to plasma                                        | 0.046046247 | KCNC4, ATP1B1, ADORA2A, SLC15A2,                                                                                                                                                                                        |

|                                                        |             |                                                                                                                                                                                                                                                                                                     |
|--------------------------------------------------------|-------------|-----------------------------------------------------------------------------------------------------------------------------------------------------------------------------------------------------------------------------------------------------------------------------------------------------|
| membrane                                               |             | CCR1, ITGB4, DAG1, ITGB1, PCDHAC2, SLC1A5, MUSK, ATP2B4, KCNQ3, CD44, ROBO1, SLC2A2, ITGAV, IL1RAP, P2RY1, ATP8B1, PTPRD, TM2D1, KCNB1, PTPRH, NLGN1, CTLA4, SLC34A1, ITGA2, PIGR, MMP15, CD40, MYH9, FZD5, KCNK2, CD84, SDC1, NPC1, EPHA6, EPS8, SLC17A3, GRM7, ROR1, HAS2, TM4SF1, SLC40A1, HTR2A |
| GO:0001726~ruffle                                      | 0.046955774 | SYNJ2, RDX, MYH9, FGD6, CD2AP, ITGB1                                                                                                                                                                                                                                                                |
| GO:0009611~response to wounding                        | 0.047273582 | YWHAZ, NRP1, ADORA2A, CCR1, CXCR1, ELK3, CD44, P2RY1, IL1RAP, MGLL, NRG1, KNG1, CEBPB, IL8, MAP1B, ITGA2, SMAD3, CHST4, CD40, MECOM, SDC1, HIF1A, TFPI, SERPIND1, HDAC9                                                                                                                             |
| GO:0042981~regulation of apoptosis                     | 0.048266166 | YWHAZ, ADORA2A, ARNT2, BCL2L1, STK17A, SOX9, TCF7L2, SRC, CRADD, PECR, PCGF2, CD44, TGM2, BCL3, DNAJC5, NRG1, DEDD2, ADAM9, PHLDA1, KNG1, CLN3, CEBPB, TM2D1, BARHL1, BIRC7, SMAD3, ACTN1, RPS6, JMY, UACA, RASGRF1, TNFAIP8, ERN2, IKBKB, IGFBP3                                                   |
| GO:0070085~glycosylation                               | 0.049265362 | ST3GAL1, MGAT4A, GALNT7, B3GNT6, UGGT1, PMM2, ST6GALNAC1, COG2, SERP1                                                                                                                                                                                                                               |
| GO:0043413~biopolymer glycosylation                    | 0.049265362 | ST3GAL1, MGAT4A, GALNT7, B3GNT6, UGGT1, PMM2, ST6GALNAC1, COG2, SERP1                                                                                                                                                                                                                               |
| GO:0006486~protein amino acid glycosylation            | 0.049265362 | ST3GAL1, MGAT4A, GALNT7, B3GNT6, UGGT1, PMM2, ST6GALNAC1, COG2, SERP1                                                                                                                                                                                                                               |
| GO:0009891~positive regulation of biosynthetic process | 0.049890836 | GLIS3, HNF1B, EVX1, ADORA2A, ARNT2, KITLG, SOX6, SOX9, TCF7L2, ZBTB38, HOXA1, MYOCD, PAX9, PTK2B, BCL3, MKL2, ARHGEF10L, EIF2B5, ATF7IP, TAF1, CEBPB, ESRRG, SMAD3, ITGA2, MECOM, AHR, GTF2H1, HES1, HIF1A, NCOA3, NFIB                                                                             |
| GO:0031252~cell leading edge                           | 0.051060225 | ADORA2A, ROBO1, SYNJ2, RDX, MYH9, FGD6, CD2AP, ITGB1, PXN                                                                                                                                                                                                                                           |
| GO:0005856~cytoskeleton                                | 0.051141504 | KIFC1, HINT1, FERMT1, TTLL6, CD2AP, RHOU, GTSE1, SPAG16, ANK3, SYNJ2, KLHL20, ENC1, TANC1, ACTN1, GAN, MYH9, FARP2, ELMO1, PJA2, ARPC1B, WBP2NL, EPB41L1, IGBP1,                                                                                                                                    |

|                                                                        |             |                                                                                                                                                                                                                                                   |
|------------------------------------------------------------------------|-------------|---------------------------------------------------------------------------------------------------------------------------------------------------------------------------------------------------------------------------------------------------|
|                                                                        |             | DYNLRB2, PARD3, YWHAZ, LITAF, ADORA2A, DAG1, KITLG, RDX, NOSTRIN, PXN, PTK2B, PLEKHG6, FGD6, MICALL2, KIF3B, EPPK1, MYO1B, MYO1E, FSCN1, MAP1B, NLGN1, KY, COTL1, UACA, EPS8, CDC42SE2, SLC13A3, MAP6, MYH14                                      |
| GO:0007411~axon guidance                                               | 0.05204112  | HOXA1, NRP1, ROBO1, UNC5A, ANK3, SIAH1, EFNA5, SLIT2                                                                                                                                                                                              |
| GO:0006357~regulation of transcription from RNA polymerase II promoter | 0.052651637 | GLIS3, HNF1B, JDP2, EVX1, LITAF, TFCP2L1, ARNT2, SOX6, SOX9, TCF7L2, ZBTB38, HOXA1, PCGF2, MYOCD, PAX9, BCL3, MKL2, ARHGEF10L, ATF7IP, TAF1, CEBPB, ZHX2, SMAD3, TLE1, MECOM, AHR, GTF2H1, JMY, HES1, HIF1A, HDAC9, NFIB                          |
| GO:0051098~regulation of binding                                       | 0.052877936 | GTPBP4, NCOA3, SMAD3, BCL3, ITGA2, NRG1, IKBKB, MAP3K13, TRIB1, JMY                                                                                                                                                                               |
| GO:0000768~syncytium formation by plasma membrane fusion               | 0.053001653 | CD44, MYH9, CAPN2                                                                                                                                                                                                                                 |
| GO:0014910~regulation of smooth muscle cell migration                  | 0.053001653 | ITGA2, IGFBP3, TRIB1                                                                                                                                                                                                                              |
| GO:0051173~positive regulation of nitrogen compound metabolic process  | 0.05332575  | GLIS3, HNF1B, EVX1, ADORA2A, ARNT2, KITLG, SOX6, SOX9, TCF7L2, ZBTB38, HOXA1, MYOCD, PAX9, BCL3, MKL2, ARHGEF10L, ATF7IP, TAF1, CEBPB, ESRRG, SMAD3, CD40, MECOM, AHR, GTF2H1, HES1, HIF1A, NCOA3, NFIB                                           |
| GO:0043067~regulation of programmed cell death                         | 0.053392226 | YWHAZ, ADORA2A, ARNT2, BCL2L1, STK17A, SOX9, TCF7L2, SRC, CRADD, PECR, PCGF2, CD44, TGM2, BCL3, DNAJC5, NRG1, DEDD2, ADAM9, PHLDA1, KNG1, CLN3, CEBPB, TM2D1, BARHL1, BIRC7, SMAD3, ACTN1, RPS6, JMY, UACA, RASGRF1, TNFAIP8, ERN2, IKBKB, IGFBP3 |
| GO:0045941~positive regulation of transcription                        | 0.054079698 | GLIS3, HNF1B, EVX1, ARNT2, SOX6, SOX9, TCF7L2, ZBTB38, HOXA1, MYOCD, PAX9, BCL3, MKL2, ARHGEF10L, ATF7IP, TAF1, CEBPB, ESRRG, SMAD3, MECOM, AHR, GTF2H1, HES1, HIF1A, NCOA3, NFIB                                                                 |
| GO:0050840~extracellular matrix binding                                | 0.055709714 | TGFBI, ITGA2, DCN, ADAM9                                                                                                                                                                                                                          |
| GO:0043193~positive regulation of gene-specific transcription          | 0.056372739 | HES1, TAF1, HIF1A, MYOCD, SMAD3, TCF7L2, ARHGEF10L                                                                                                                                                                                                |
| GO:0010941~regulation of cell death                                    | 0.056579738 | YWHAZ, ADORA2A, ARNT2, BCL2L1,                                                                                                                                                                                                                    |

|                                                                 |             |                                                                                                                                                                                                                    |
|-----------------------------------------------------------------|-------------|--------------------------------------------------------------------------------------------------------------------------------------------------------------------------------------------------------------------|
|                                                                 |             | STK17A, SOX9, TCF7L2, SRC, CRADD, PECR, PCGF2, CD44, TGM2, BCL3, DNAJC5, NRG1, DEDD2, ADAM9, PHLDA1, KNG1, CLN3, CEBPB, TM2D1, BARHL1, BIRC7, SMAD3, ACTN1, RPS6, JMY, UACA, RASGRF1, TNFAIP8, ERN2, IKBKB, IGFBP3 |
| GO:0035051~cardiac cell differentiation                         | 0.056784904 | MYOCD, SOX6, NRG1, ITGB1                                                                                                                                                                                           |
| GO:0016044~membrane organization                                | 0.057060628 | MICALL2, SNAP29, CLN3, SYNRG, ADORA2A, LRP1B, NOSTRIN, BCL2L1, MEGF10, ELMO1, NPC1, LRP10, CDC42SE2, PACSIN2, PLSCR2, ITGAV, LRP3, SERP1, LRP5                                                                     |
| GO:0000902~cell morphogenesis                                   | 0.058483758 | PARD6B, PARD3, NRP1, ADORA2A, TFCP2L1, MAP1B, SOX6, MYH9, SOX9, SLIT2, HES1, HOXA1, HIF1A, ROBO1, UNC5A, ANK3, EFNA5, SIAH1                                                                                        |
| GO:0001655~urogenital system development                        | 0.058733501 | ODC1, HNF1B, SDC1, CD44, MYO1E, SALL1, TIPARP, SLIT2                                                                                                                                                               |
| GO:0060284~regulation of cell development                       | 0.059674315 | HES1, MUSK, NRP1, MYOCD, ROBO1, MAP1B, NLGN1, SMAD3, HDAC9, IGFBP3, SLIT2, MBP                                                                                                                                     |
| GO:0032583~regulation of gene-specific transcription            | 0.061270002 | HES1, TAF1, HIF1A, EVX1, MYOCD, SMAD3, HDAC9, TCF7L2, ARHGEF10L                                                                                                                                                    |
| GO:0030335~positive regulation of cell migration                | 0.061639726 | HIF1A, PTK2B, SMAD3, ITGA2, HDAC9, PIK3R1, ADAM9                                                                                                                                                                   |
| GO:0046128~purine ribonucleoside metabolic process              | 0.061912605 | COASY, PANK3, ADK, PPCDC                                                                                                                                                                                           |
| GO:0048641~regulation of skeletal muscle tissue development     | 0.061912605 | MUSK, MYOCD, HDAC9, IGFBP3                                                                                                                                                                                         |
| GO:0050921~positive regulation of chemotaxis                    | 0.061912605 | IL8, SMAD3, ITGA2, SLIT2                                                                                                                                                                                           |
| GO:0042278~purine nucleoside metabolic process                  | 0.061912605 | COASY, PANK3, ADK, PPCDC                                                                                                                                                                                           |
| GO:0033341~regulation of collagen binding                       | 0.061991104 | GTPBP4, ITGA2                                                                                                                                                                                                      |
| GO:0010694~positive regulation of alkaline phosphatase activity | 0.061991104 | SMAD3, ITGA2                                                                                                                                                                                                       |
| GO:0051674~localization of cell                                 | 0.06205127  | NRP1, IL8, BARHL1, KITLG, MYH9, CD2AP, ITGB1, SRC, SLIT2, TNS3, HIF1A, CD44, PTK2B, FYN, ROBO1, LRP5                                                                                                               |
| GO:0048870~cell motility                                        | 0.06205127  | NRP1, IL8, BARHL1, KITLG, MYH9, CD2AP, ITGB1, SRC, SLIT2, TNS3, HIF1A, CD44, PTK2B, FYN, ROBO1, LRP5                                                                                                               |
| GO:0016791~phosphatase activity                                 | 0.062950309 | PHLPP1, ALPL, PTPRD, PTPN2, PTPRH, ACP6, PTPRT, LPIN2, LPIN1, PTPN12,                                                                                                                                              |

|                                                                  |             |                                                                                                                                                                                   |
|------------------------------------------------------------------|-------------|-----------------------------------------------------------------------------------------------------------------------------------------------------------------------------------|
|                                                                  |             | SACM1L, SYNJ2, INPP4B, PTPN1                                                                                                                                                      |
| GO:0006909~phagocytosis                                          | 0.063722471 | ADORA2A, CDC42SE2, ITGAV, MEGF10, ELMO1                                                                                                                                           |
| GO:0005083~small GTPase regulator activity                       | 0.063829196 | TNIK, AGFG2, ADAP1, ANXA2, FARP2, MCF2L2, PLEKHG3, RASGRF1, PLEKHG6, AGAP1, FGD6, SPATA13, ARHGEF10L, IQSEC1, RASA2                                                               |
| GO:0008284~positive regulation of cell proliferation             | 0.064393384 | ODC1, NRP1, MARCKSL1, ARNT2, ITGA2, KITLG, BCL2L1, CD40, ITGB1, HES1, TNS3, TNFRSF11A, HIF1A, MYOCD, PTK2B, TGM2, NRG1, THPO, LRP5, HTR2A                                         |
| GO:0003779~actin binding                                         | 0.066339463 | PHACTR3, MYO1B, MYO1E, ENC1, FSCN1, MAP1B, ACTN1, RDX, MYH9, COTL1, JMY, ARPC1B, EPB41L1, PLS1, MYH14, MKL2, KLHL20                                                               |
| GO:0016831~carboxy-lyase activity                                | 0.066409837 | ODC1, BCKDHB, PISD, PPCDC                                                                                                                                                         |
| GO:0048667~cell morphogenesis involved in neuron differentiation | 0.066540676 | HES1, HOXA1, PARD6B, PARD3, NRP1, ROBO1, UNC5A, ANK3, MAP1B, SIAH1, EFNA5, SLIT2                                                                                                  |
| GO:0007229~integrin-mediated signaling pathway                   | 0.069330945 | ITGAV, ITGB4, ITGA2, MYH9, ITGB1, ADAM9                                                                                                                                           |
| GO:0006949~syncytium formation                                   | 0.07013938  | CD44, MYH9, CAPN2                                                                                                                                                                 |
| GO:0010628~positive regulation of gene expression                | 0.070811693 | GLIS3, HNF1B, EVX1, ARNT2, SOX6, SOX9, TCF7L2, ZBTB38, HOXA1, MYOCD, PAX9, BCL3, MKL2, ARHGEF10L, ATF7IP, TAF1, CEBPB, ESRRG, SMAD3, MECOM, AHR, GTF2H1, HES1, HIF1A, NCOA3, NFIB |
| GO:0050920~regulation of chemotaxis                              | 0.072784442 | IL8, SMAD3, ITGA2, SLIT2                                                                                                                                                          |
| GO:0033267~axon part                                             | 0.073930472 | ADORA2A, ROBO1, SYNJ2, ITGA2, MBP                                                                                                                                                 |
| GO:0048812~neuron projection morphogenesis                       | 0.074198788 | HOXA1, PARD6B, PARD3, NRP1, ADORA2A, ROBO1, UNC5A, ANK3, MAP1B, SIAH1, EFNA5, SLIT2                                                                                               |
| GO:0043524~negative regulation of neuron apoptosis               | 0.076162881 | CLN3, ADORA2A, BARHL1, DNAJC5, BCL2L1                                                                                                                                             |
| GO:0050878~regulation of body fluid levels                       | 0.07741169  | KNG1, ADORA2A, P2RY1, TFPI, ITGA2, SERPIND1, CD40, PDSS2, ANXA2                                                                                                                   |
| GO:0008376~acetylgalactosaminyltransferase activity              | 0.077970576 | CHSY3, GALNT7, B4GALNT3, CHSY1                                                                                                                                                    |
| GO:0032989~cellular component morphogenesis                      | 0.078378089 | PARD6B, PARD3, NRP1, ADORA2A, TFCEP2L1, MAP1B, SOX6, MYH9, SOX9, ITGB1, SLIT2, HES1, HOXA1, HIF1A, ROBO1, UNC5A, ANK3, EFNA5, SIAH1                                               |
| GO:0044087~regulation of cellular component biogenesis           | 0.079907227 | ATF7IP, TAF1, ARPC1B, MUSK, MAP1B, SMAD3, RDX, AHR, ARHGEF10L                                                                                                                     |
| GO:0060589~nucleoside-triphosphatase regulator activity          | 0.080215671 | GRPEL2, TNIK, AGFG2, RALGAPB, SIPA1L3, ADAP1, ANXA2, FARP2,                                                                                                                       |

|                                                           |             |                                                                                                                                                                                                                                       |
|-----------------------------------------------------------|-------------|---------------------------------------------------------------------------------------------------------------------------------------------------------------------------------------------------------------------------------------|
|                                                           |             | MCF2L2, PLEKHG3, RASGRF1, PLEKHG6, AGAP1, SPATA13, FGD6, ARHGEF10L, IQSEC1, EIF2B5, RASA2, BCAR3                                                                                                                                      |
| GO:0030705~cytoskeleton-dependent intracellular transport | 0.080561692 | SPG7, KIF3B, MYO1E, MYH14, MYH9                                                                                                                                                                                                       |
| GO:0005768~endosome                                       | 0.082280983 | KIFC1, CLN3, SCAMP2, STARD3NL, CHMP4B, STAM2, GOLIM4, ANXA2, NPC1, SLC29A3, FYN, SLC2A2, SIAH1, ATP6V0A4, RAB11FIP1                                                                                                                   |
| GO:0042127~regulation of cell proliferation               | 0.082523728 | NRP1, ADORA2A, MARCKSL1, ARNT2, EGLN3, KITLG, BCL2L1, SOX9, ITGB1, TRIB1, TNFRSF11A, MYOCD, PTK2B, TGM2, NRG1, THPO, ODC1, TP53I11, GTPBP4, IL8, CTLA4, SMAD3, ITGA2, CD40, MECOM, HES1, TNS3, HIF1A, IGFBP3, NFIB, HTR2A, LRP5, TOB1 |
| GO:0009898~internal side of plasma membrane               | 0.083709455 | RAP2B, SNX18, LITAF, STAM2, FERMT1, NOSTRIN, RDX, BCL2L1, RHOU, MBP, RHEB, PTPN1, TJP2, SERP1, COG2                                                                                                                                   |
| GO:0014033~neural crest cell differentiation              | 0.084441479 | HIF1A, KITLG, SOX9, NRG1                                                                                                                                                                                                              |
| GO:0014032~neural crest cell development                  | 0.084441479 | HIF1A, KITLG, SOX9, NRG1                                                                                                                                                                                                              |
| GO:0007409~axonogenesis                                   | 0.0845304   | HOXA1, PARD6B, PARD3, NRP1, ROBO1, UNC5A, ANK3, MAP1B, SIAH1, EFNA5, SLIT2                                                                                                                                                            |
| GO:0005516~calmodulin binding                             | 0.085358134 | ATP2B4, MARCKSL1, MYO1B, MYO1E, PHKG2, EEF2K, MYH14, MAP6, MYH9                                                                                                                                                                       |
| GO:0043065~positive regulation of apoptosis               | 0.086342837 | KNG1, CEBPB, TM2D1, ADORA2A, SMAD3, BCL2L1, STK17A, RPS6, CRADD, SRC, JMY, UACA, CD44, RASGRF1, TGM2, ERN2, BCL3, IGFBP3, DEDD2, PHLDA1                                                                                               |
| GO:0031532~actin cytoskeleton reorganization              | 0.088792903 | EPS8, MYH9, LPIN1                                                                                                                                                                                                                     |
| GO:0051272~positive regulation of cell motion             | 0.088818772 | HIF1A, PTK2B, SMAD3, ITGA2, HDAC9, PIK3R1, ADAM9                                                                                                                                                                                      |
| GO:0043068~positive regulation of programmed cell death   | 0.088838772 | KNG1, CEBPB, TM2D1, ADORA2A, SMAD3, BCL2L1, STK17A, RPS6, CRADD, SRC, JMY, UACA, CD44, RASGRF1, TGM2, ERN2, BCL3, IGFBP3, DEDD2, PHLDA1                                                                                               |
| GO:0048520~positive regulation of behavior                | 0.090549788 | IL8, SMAD3, ITGA2, SLIT2                                                                                                                                                                                                              |
| GO:0042113~B cell activation                              | 0.091225377 | IGBP1, BCL3, CD40, HDAC9, ITGB1, PIK3R1                                                                                                                                                                                               |
| GO:0046856~phosphoinositide                               | 0.091533599 | SYNJ2, SACM1L                                                                                                                                                                                                                         |

|                                                                                                  |             |                                                                                                                                                                                                                                         |
|--------------------------------------------------------------------------------------------------|-------------|-----------------------------------------------------------------------------------------------------------------------------------------------------------------------------------------------------------------------------------------|
| dephosphorylation                                                                                |             |                                                                                                                                                                                                                                         |
| GO:0010692~regulation of alkaline phosphatase activity                                           | 0.091533599 | SMAD3, ITGA2                                                                                                                                                                                                                            |
| GO:0010507~negative regulation of autophagy                                                      | 0.091533599 | CLN3, NPC1                                                                                                                                                                                                                              |
| GO:0016075~rRNA catabolic process                                                                | 0.091533599 | ERN2, DEDD2                                                                                                                                                                                                                             |
| GO:0016242~negative regulation of macroautophagy                                                 | 0.091533599 | CLN3, NPC1                                                                                                                                                                                                                              |
| GO:0017124~SH3 domain binding                                                                    | 0.091587468 | SH3BP5, USP8, SYNJ2, CD2AP, PTPN12, ADAM9, ELMO1                                                                                                                                                                                        |
| GO:0005667~transcription factor complex                                                          | 0.091691545 | ATF7IP, TAF1, HNF1B, HIF1A, ARNT2, TFDP2, SMAD3, TLE1, HDAC9, TCF7L2, GTF2H1                                                                                                                                                            |
| GO:0051015~actin filament binding                                                                | 0.092357835 | FSCN1, PLS1, ACTN1, MYH14, MYH9                                                                                                                                                                                                         |
| GO:0015662~ATPase activity, coupled to transmembrane movement of ions, phosphorylative mechanism | 0.092357835 | ATP1B1, ATP2B4, ATP9A, ATP8B1, ATP6V0A4                                                                                                                                                                                                 |
| GO:0043066~negative regulation of apoptosis                                                      | 0.093827079 | CLN3, YWHAZ, CEBPB, ADORA2A, BARHL1, ARNT2, BIRC7, SMAD3, BCL2L1, TCF7L2, PCGF2, TNFAIP8, TGM2, BCL3, DNAJC5, IKBKB, NRG1                                                                                                               |
| GO:0010942~positive regulation of cell death                                                     | 0.09395039  | KNG1, CEBPB, TM2D1, ADORA2A, SMAD3, BCL2L1, STK17A, RPS6, CRADD, SRC, JMY, UACA, CD44, RASGRF1, TGM2, ERN2, BCL3, IGFBP3, DEDD2, PHLDA1                                                                                                 |
| GO:0044431~Golgi apparatus part                                                                  | 0.094335965 | SYS1, CLN3, SYNRG, SCAMP2, HS3ST1, GOLIM4, CHST4, ST6GALNAC1, ST3GAL1, CHSY3, B4GALNT3, CHSY1, PDGFD, COG2                                                                                                                              |
| GO:0010769~regulation of cell morphogenesis involved in differentiation                          | 0.095184406 | NRP1, ROBO1, MAP1B, SMAD3, SLIT2, MBP                                                                                                                                                                                                   |
| GO:0009890~negative regulation of biosynthetic process                                           | 0.095502872 | GLIS3, JDP2, TFPC2L1, HUS1, NOSTRIN, ELK3, IGF2BP3, SOX6, SOX9, PCGF2, ITGAV, ATP8B1, BCL3, NRG1, DEDD2, EIF2B5, ATF7IP, GTPBP4, ZHX2, SMAD3, TLE1, HES1, GRM7, ERN2, HDAC9                                                             |
| GO:0016310~phosphorylation                                                                       | 0.096006787 | HUS1, STK17A, SRC, TRIB1, TOP1, SGK223, MUSK, UQCR10, CLK3, PTK2B, EEF2K, PRKACB, AKT3, PIK3R1, ADAM9, TAF1, TNIK, PHKG2, BIRC7, PRKCH, RPS6KA3, EPHA6, PLK2, FYN, RPS6KA2, RSRC1, NDUFV2, ROR1, ERN2, ATP6V0A4, IKBKB, MAP3K13, IGFBP3 |
| GO:0009260~ribonucleotide biosynthetic process                                                   | 0.09669166  | ATP1B1, ATP2B4, ATP9A, ADK, ATP8B1, PRPS1L1, ATP6V0A4, CMPK1                                                                                                                                                                            |



|                                                                      |             |                                                                                                                                                                       |
|----------------------------------------------------------------------|-------------|-----------------------------------------------------------------------------------------------------------------------------------------------------------------------|
| GO:0010558~negative regulation of macromolecule biosynthetic process | 0.098025328 | ATF7IP, GLIS3, GTPBP4, JDP2, TFCP2L1, HUS1, ZHX2, SMAD3, TLE1, NOSTRIN, ELK3, SOX6, IGF2BP3, SOX9, HES1, PCGF2, ITGAV, ATP8B1, ERN2, BCL3, HDAC9, NRG1, DEDD2, EIF2B5 |
| GO:0021700~developmental maturation                                  | 0.099124803 | HES1, CD44, PTK2B, TFCP2L1, MAP1B, FZD5, FARP2                                                                                                                        |
| GO:0030182~neuron differentiation                                    | 0.099229699 | PARD6B, PARD3, NRP1, CEBPB, EVX1, ADORA2A, MAP1B, SLIT2, FARP2, HES1, HOXA1, CD44, ROBO1, ANK3, UNC5A, PTK2B, ATXN10, RASGRF1, EFNA5, SIAH1                           |

Table S5. List of transcripts differentially expressed by at least 1.5-fold in siRNA mediated EHF knockdown versus negative control Calu-3 cells.

| Gene ID         | Gene Name    | FPKM                      |              | Log2<br>(fold change) | Fold<br>Change | P value  |
|-----------------|--------------|---------------------------|--------------|-----------------------|----------------|----------|
|                 |              | Negative<br>Control siRNA | EHF<br>siRNA |                       |                |          |
| ENSG00000237550 | RPL9P9       | 16.7                      | 0.0          | NA                    | 0.0            | 0.0043   |
| ENSG00000230937 | MIR205HG     | 47.4                      | 0.1          | 8.3                   | 0.0            | 0.00065  |
| ENSG00000230903 | RPL9P8       | 19.4                      | 0.1          | 7.4                   | 0.0            | 0.00335  |
| ENSG00000121552 | CSTA         | 5.6                       | 0.3          | 4.1                   | 0.1            | 0.0013   |
| ENSG00000186081 | KRT5         | 37.3                      | 2.8          | 3.8                   | 0.1            | 5.00E-05 |
| ENSG00000205420 | KRT6A        | 17.2                      | 1.3          | 3.7                   | 0.1            | 5.00E-05 |
| ENSG00000143546 | S100A8       | 7.6                       | 0.9          | 3.2                   | 0.1            | 5.00E-05 |
| ENSG00000065618 | COL17A1      | 1.8                       | 0.2          | 3.0                   | 0.1            | 5.00E-05 |
| ENSG00000170477 | KRT4         | 2.5                       | 0.4          | 2.8                   | 0.1            | 5.00E-05 |
| ENSG00000131746 | TNS4         | 0.5                       | 0.1          | 2.6                   | 0.2            | 5.00E-05 |
| ENSG00000163220 | S100A9       | 13.1                      | 2.2          | 2.6                   | 0.2            | 5.00E-05 |
| ENSG00000168878 | SFTPBP       | 0.7                       | 0.1          | 2.6                   | 0.2            | 0.0001   |
| ENSG00000185303 | SFTPAP2      | 0.5                       | 0.1          | 2.4                   | 0.2            | 5.00E-05 |
| ENSG00000189001 | SBSN         | 0.6                       | 0.1          | 2.4                   | 0.2            | 0.00025  |
| ENSG00000169469 | SPRR1B       | 8.9                       | 1.9          | 2.2                   | 0.2            | 5.00E-05 |
| ENSG00000138294 | MSMB         | 4.6                       | 1.2          | 1.9                   | 0.3            | 5.00E-05 |
| ENSG00000149021 | SCGB1A1      | 6.5                       | 1.8          | 1.8                   | 0.3            | 5.00E-05 |
| ENSG00000081277 | PKP1         | 0.6                       | 0.2          | 1.8                   | 0.3            | 5.00E-05 |
| ENSG00000168484 | SFTPC        | 0.7                       | 0.2          | 1.7                   | 0.3            | 0.0015   |
| ENSG00000108602 | ALDH3A1      | 2.3                       | 0.7          | 1.7                   | 0.3            | 5.00E-05 |
| ENSG00000088726 | TMEM40       | 0.7                       | 0.2          | 1.6                   | 0.3            | 0.00085  |
| ENSG00000176884 | GRIN1        | 0.5                       | 0.2          | 1.5                   | 0.3            | 0.00185  |
| ENSG00000132386 | SERPINF1     | 1.5                       | 0.5          | 1.5                   | 0.4            | 5.00E-05 |
| ENSG00000169474 | SPRR1A       | 4.5                       | 1.6          | 1.5                   | 0.4            | 5.00E-05 |
| ENSG00000227217 | RP11-367J7.3 | 1.4                       | 0.5          | 1.5                   | 0.4            | 0.0026   |
| ENSG00000140519 | RHCG         | 1.0                       | 0.4          | 1.4                   | 0.4            | 5.00E-05 |
| ENSG00000264462 | MIR3648      | 1438.2                    | 544.3        | 1.4                   | 0.4            | 5.00E-05 |
| ENSG00000156869 | FRRS1        | 3.5                       | 1.3          | 1.4                   | 0.4            | 5.00E-05 |
| ENSG00000135373 | EHF          | 11.9                      | 4.8          | 1.3                   | 0.4            | 5.00E-05 |
| ENSG00000247844 | CCAT1        | 2.6                       | 1.2          | 1.2                   | 0.5            | 5.00E-05 |
| ENSG00000187994 | RINL         | 1.2                       | 0.6          | 1.1                   | 0.5            | 0.00035  |
| ENSG00000169752 | NRG4         | 1.4                       | 0.7          | 1.1                   | 0.5            | 0.00045  |
| ENSG00000231298 | LINC00704    | 2.4                       | 1.1          | 1.1                   | 0.5            | 5.00E-05 |
| ENSG00000198643 | FAM3D        | 0.9                       | 0.4          | 1.0                   | 0.5            | 0.00245  |
| ENSG00000124664 | SPDEF        | 7.4                       | 3.6          | 1.0                   | 0.5            | 5.00E-05 |
| ENSG00000171033 | PKIA         | 1.5                       | 0.7          | 1.0                   | 0.5            | 0.0001   |
| ENSG00000198855 | FICD         | 7.0                       | 3.5          | 1.0                   | 0.5            | 0.0005   |

|                 |              |       |       |     |     |          |
|-----------------|--------------|-------|-------|-----|-----|----------|
| ENSG00000140199 | SLC12A6      | 0.6   | 0.3   | 1.0 | 0.5 | 0.00065  |
| ENSG00000180535 | BHLHA15      | 2.3   | 1.2   | 1.0 | 0.5 | 0.0007   |
| ENSG00000147689 | FAM83A       | 0.8   | 0.4   | 1.0 | 0.5 | 0.00135  |
| ENSG00000139117 | CPNE8        | 3.4   | 1.7   | 1.0 | 0.5 | 5.00E-05 |
| ENSG00000250606 | PRSS3P2      | 1.7   | 0.9   | 1.0 | 0.5 | 0.00125  |
| ENSG00000171928 | TVP23B       | 10.0  | 5.1   | 1.0 | 0.5 | 5.00E-05 |
| ENSG00000196611 | MMP1         | 1.9   | 1.0   | 1.0 | 0.5 | 5.00E-05 |
| ENSG00000196754 | S100A2       | 57.9  | 30.3  | 0.9 | 0.5 | 5.00E-05 |
| ENSG00000186847 | KRT14        | 25.2  | 13.3  | 0.9 | 0.5 | 5.00E-05 |
| ENSG00000124762 | CDKN1A       | 53.5  | 28.5  | 0.9 | 0.5 | 5.00E-05 |
| ENSG00000169359 | SLC33A1      | 22.7  | 12.1  | 0.9 | 0.5 | 5.00E-05 |
| ENSG00000163904 | SENP2        | 15.1  | 8.1   | 0.9 | 0.5 | 5.00E-05 |
| ENSG00000183723 | CMTM4        | 22.4  | 12.1  | 0.9 | 0.5 | 5.00E-05 |
| ENSG00000125999 | BPIFB1       | 2.5   | 1.4   | 0.9 | 0.6 | 5.00E-05 |
| ENSG00000166128 | RAB8B        | 2.2   | 1.2   | 0.8 | 0.6 | 5.00E-05 |
| ENSG00000004961 | HCCS         | 36.3  | 20.4  | 0.8 | 0.6 | 5.00E-05 |
| ENSG00000188505 | NCCRP1       | 1.6   | 0.9   | 0.8 | 0.6 | 0.00045  |
| ENSG00000260912 | RP11-363E7.4 | 3.7   | 2.1   | 0.8 | 0.6 | 5.00E-05 |
| ENSG00000086619 | ERO1LB       | 2.8   | 1.6   | 0.8 | 0.6 | 5.00E-05 |
| ENSG00000047634 | SCML1        | 4.1   | 2.4   | 0.8 | 0.6 | 5.00E-05 |
| ENSG00000143398 | PIP5K1A      | 12.0  | 6.9   | 0.8 | 0.6 | 5.00E-05 |
| ENSG00000117461 | PIK3R3       | 3.9   | 2.2   | 0.8 | 0.6 | 0.00405  |
| ENSG00000033867 | SLC4A7       | 3.0   | 1.7   | 0.8 | 0.6 | 5.00E-05 |
| ENSG00000116161 | CACYBP       | 183.1 | 106.3 | 0.8 | 0.6 | 5.00E-05 |
| ENSG00000068793 | CYFIP1       | 15.0  | 8.8   | 0.8 | 0.6 | 0.00035  |
| ENSG00000269378 | ITGB1P1      | 22.2  | 13.2  | 0.8 | 0.6 | 5.00E-05 |
| ENSG00000149212 | SESN3        | 0.9   | 0.6   | 0.8 | 0.6 | 0.0005   |
| ENSG00000142583 | SLC2A5       | 1.7   | 1.0   | 0.8 | 0.6 | 0.00155  |
| ENSG00000187800 | PEAR1        | 0.9   | 0.6   | 0.8 | 0.6 | 0.00065  |
| ENSG00000267473 | AC005789.11  | 1.2   | 0.7   | 0.7 | 0.6 | 0.00325  |
| ENSG00000176697 | BDNF         | 3.3   | 2.0   | 0.7 | 0.6 | 5.00E-05 |
| ENSG00000165023 | DIRAS2       | 0.7   | 0.4   | 0.7 | 0.6 | 0.00065  |
| ENSG00000169184 | MN1          | 1.0   | 0.6   | 0.7 | 0.6 | 0.00115  |
| ENSG00000134755 | DSC2         | 6.0   | 3.6   | 0.7 | 0.6 | 5.00E-05 |
| ENSG00000150961 | SEC24D       | 8.1   | 4.9   | 0.7 | 0.6 | 5.00E-05 |
| ENSG00000132541 | HRSP12       | 27.6  | 16.8  | 0.7 | 0.6 | 5.00E-05 |
| ENSG00000064787 | BCAS1        | 5.9   | 3.6   | 0.7 | 0.6 | 5.00E-05 |
| ENSG00000186832 | KRT16        | 36.1  | 22.1  | 0.7 | 0.6 | 5.00E-05 |
| ENSG00000018610 | CXorf56      | 12.2  | 7.5   | 0.7 | 0.6 | 5.00E-05 |
| ENSG00000100934 | SEC23A       | 5.9   | 3.7   | 0.7 | 0.6 | 5.00E-05 |
| ENSG00000180730 | SHISA2       | 1.2   | 0.7   | 0.7 | 0.6 | 0.00085  |

|                 |          |       |       |     |     |          |
|-----------------|----------|-------|-------|-----|-----|----------|
| ENSG00000196950 | SLC39A10 | 8.0   | 5.0   | 0.7 | 0.6 | 5.00E-05 |
| ENSG00000139973 | SYT16    | 0.7   | 0.4   | 0.7 | 0.6 | 0.004    |
| ENSG00000110422 | HIPK3    | 3.6   | 2.2   | 0.7 | 0.6 | 5.00E-05 |
| ENSG00000213654 | GPSM3    | 3.8   | 2.4   | 0.7 | 0.6 | 0.0007   |
| ENSG00000164171 | ITGA2    | 15.3  | 9.6   | 0.7 | 0.6 | 5.00E-05 |
| ENSG00000140835 | CHST4    | 3.6   | 2.3   | 0.7 | 0.6 | 0.0017   |
| ENSG00000122861 | PLAU     | 634.7 | 400.2 | 0.7 | 0.6 | 5.00E-05 |
| ENSG00000106351 | AGFG2    | 35.7  | 22.6  | 0.7 | 0.6 | 5.00E-05 |
| ENSG00000164300 | SERINC5  | 1.5   | 1.0   | 0.7 | 0.6 | 0.0043   |
| ENSG00000144908 | ALDH1L1  | 5.2   | 3.3   | 0.7 | 0.6 | 5.00E-05 |
| ENSG00000109321 | AREG     | 45.2  | 28.8  | 0.7 | 0.6 | 5.00E-05 |
| ENSG00000204983 | PRSS1    | 9.5   | 6.0   | 0.7 | 0.6 | 5.00E-05 |
| ENSG00000163735 | CXCL5    | 207.3 | 132.3 | 0.6 | 0.6 | 5.00E-05 |
| ENSG00000114353 | GNAI2    | 77.3  | 49.5  | 0.6 | 0.6 | 5.00E-05 |
| ENSG00000106541 | AGR2     | 243.2 | 156.1 | 0.6 | 0.6 | 5.00E-05 |
| ENSG00000165272 | AQP3     | 5.6   | 3.6   | 0.6 | 0.6 | 5.00E-05 |
| ENSG00000167130 | DOLPP1   | 12.5  | 8.0   | 0.6 | 0.6 | 5.00E-05 |
| ENSG00000166575 | TMEM135  | 3.6   | 2.3   | 0.6 | 0.6 | 0.00105  |
| ENSG00000115520 | COQ10B   | 11.6  | 7.5   | 0.6 | 0.6 | 5.00E-05 |
| ENSG00000165997 | ARL5B    | 3.8   | 2.5   | 0.6 | 0.6 | 5.00E-05 |
| ENSG00000137094 | DNAJB5   | 3.7   | 2.4   | 0.6 | 0.7 | 5.00E-05 |
| ENSG00000148082 | SHC3     | 6.0   | 3.9   | 0.6 | 0.7 | 0.0006   |
| ENSG00000151117 | TMEM86A  | 6.6   | 4.3   | 0.6 | 0.7 | 5.00E-05 |
| ENSG00000115339 | GALNT3   | 27.1  | 17.8  | 0.6 | 0.7 | 5.00E-05 |
| ENSG00000173227 | SYT12    | 1.1   | 0.7   | 0.6 | 0.7 | 0.00355  |
| ENSG00000102359 | SRPX2    | 9.3   | 6.1   | 0.6 | 0.7 | 5.00E-05 |
| ENSG00000175040 | CHST2    | 0.9   | 0.6   | 0.6 | 0.7 | 0.00375  |
| ENSG00000137699 | TRIM29   | 2.9   | 2.0   | 0.6 | 0.7 | 0.0017   |
| ENSG00000127955 | GNAI1    | 3.9   | 2.6   | 0.6 | 0.7 | 0.00105  |
| ENSG00000138623 | SEMA7A   | 64.8  | 43.2  | 0.6 | 0.7 | 5.00E-05 |
| ENSG00000139496 | NUPL1    | 5.1   | 3.4   | 0.6 | 0.7 | 5.00E-05 |
| ENSG00000105656 | ELL      | 3.0   | 2.0   | 0.6 | 0.7 | 0.0001   |
| ENSG00000134668 | SPOCD1   | 2.5   | 1.6   | 0.6 | 0.7 | 0.0005   |
| ENSG00000019186 | CYP24A1  | 112.1 | 74.9  | 0.6 | 0.7 | 0.00015  |
| ENSG00000144959 | NCEH1    | 34.0  | 22.8  | 0.6 | 0.7 | 5.00E-05 |
| ENSG00000124875 | CXCL6    | 13.1  | 8.8   | 0.6 | 0.7 | 5.00E-05 |
| ENSG00000221926 | TRIM16   | 22.1  | 14.9  | 0.6 | 0.7 | 5.00E-05 |
| ENSG00000170412 | GPRC5C   | 23.0  | 15.5  | 0.6 | 0.7 | 5.00E-05 |
| ENSG00000113742 | CPEB4    | 3.2   | 2.1   | 0.6 | 0.7 | 0.00015  |
| ENSG00000203666 | EFCAB2   | 5.6   | 3.7   | 0.6 | 0.7 | 0.00195  |
| ENSG00000198833 | UBE2J1   | 8.6   | 5.8   | 0.6 | 0.7 | 5.00E-05 |

|                 |            |        |        |      |     |          |
|-----------------|------------|--------|--------|------|-----|----------|
| ENSG00000074416 | MGLL       | 21.1   | 14.3   | 0.6  | 0.7 | 5.00E-05 |
| ENSG00000163605 | PPP4R2     | 10.2   | 6.9    | 0.6  | 0.7 | 5.00E-05 |
| ENSG00000100479 | POLE2      | 7.4    | 11.2   | -0.6 | 1.5 | 0.0016   |
| ENSG00000196533 | C1orf186   | 17.6   | 26.6   | -0.6 | 1.5 | 5.00E-05 |
| ENSG00000111331 | OAS3       | 4.2    | 6.4    | -0.6 | 1.5 | 0.00325  |
| ENSG00000160446 | ZDHHC12    | 55.1   | 83.7   | -0.6 | 1.5 | 5.00E-05 |
| ENSG00000132031 | MATN3      | 2.4    | 3.6    | -0.6 | 1.5 | 5.00E-05 |
| ENSG00000143549 | TPM3       | 138.6  | 210.7  | -0.6 | 1.5 | 5.00E-05 |
| ENSG00000170745 | KCNS3      | 1.2    | 1.8    | -0.6 | 1.5 | 0.00165  |
| ENSG00000161243 | FBXO27     | 19.0   | 29.0   | -0.6 | 1.5 | 5.00E-05 |
| ENSG00000137959 | IFI44L     | 1.6    | 2.5    | -0.6 | 1.5 | 0.0037   |
| ENSG00000138750 | NUP54      | 9.0    | 13.8   | -0.6 | 1.5 | 5.00E-05 |
| ENSG00000072401 | UBE2D1     | 9.7    | 14.9   | -0.6 | 1.5 | 5.00E-05 |
| ENSG00000163739 | CXCL1      | 67.2   | 102.9  | -0.6 | 1.5 | 5.00E-05 |
| ENSG00000134574 | DDB2       | 10.3   | 15.9   | -0.6 | 1.5 | 5.00E-05 |
| ENSG00000159166 | LAD1       | 90.4   | 138.8  | -0.6 | 1.5 | 5.00E-05 |
| ENSG00000103355 | PRSS33     | 4.7    | 7.3    | -0.6 | 1.5 | 5.00E-05 |
| ENSG00000119946 | CNNM1      | 0.5    | 0.8    | -0.6 | 1.5 | 0.00165  |
| ENSG00000118507 | AKAP7      | 1.1    | 1.7    | -0.6 | 1.5 | 0.0032   |
| ENSG00000023445 | BIRC3      | 4.9    | 7.6    | -0.6 | 1.5 | 5.00E-05 |
| ENSG00000143147 | GPR161     | 1.3    | 2.0    | -0.6 | 1.5 | 0.00015  |
| ENSG00000135314 | KHDC1      | 3.0    | 4.6    | -0.6 | 1.5 | 0.0014   |
| ENSG00000269215 | AC008964.1 | 6.4    | 9.9    | -0.6 | 1.5 | 5.00E-05 |
| ENSG00000106366 | SERPINE1   | 1.0    | 1.6    | -0.6 | 1.6 | 0.0004   |
| ENSG00000065320 | NTN1       | 0.6    | 0.9    | -0.6 | 1.6 | 0.00035  |
| ENSG00000196715 | VKORC1L1   | 6.0    | 9.4    | -0.6 | 1.6 | 5.00E-05 |
| ENSG00000140511 | HAPLN3     | 3.7    | 5.7    | -0.6 | 1.6 | 5.00E-05 |
| ENSG00000040608 | RTN4R      | 7.8    | 12.2   | -0.6 | 1.6 | 5.00E-05 |
| ENSG00000244509 | APOBEC3C   | 10.1   | 15.7   | -0.6 | 1.6 | 5.00E-05 |
| ENSG00000137767 | SQRDL      | 17.8   | 27.8   | -0.6 | 1.6 | 5.00E-05 |
| ENSG00000107566 | ERLIN1     | 4.9    | 7.6    | -0.6 | 1.6 | 5.00E-05 |
| ENSG00000163993 | S100P      | 441.4  | 695.2  | -0.7 | 1.6 | 5.00E-05 |
| ENSG00000135378 | PRRG4      | 3.1    | 4.8    | -0.7 | 1.6 | 5.00E-05 |
| ENSG00000008282 | SYPL1      | 31.0   | 48.9   | -0.7 | 1.6 | 5.00E-05 |
| ENSG00000160862 | AZGP1      | 8.3    | 13.1   | -0.7 | 1.6 | 5.00E-05 |
| ENSG00000138061 | CYP1B1     | 1.1    | 1.7    | -0.7 | 1.6 | 0.0002   |
| ENSG00000089157 | RPLP0      | 2305.7 | 3668.2 | -0.7 | 1.6 | 0.00135  |
| ENSG00000134323 | MYCN       | 3.4    | 5.4    | -0.7 | 1.6 | 5.00E-05 |
| ENSG00000160223 | ICOSLG     | 0.6    | 1.0    | -0.7 | 1.6 | 0.0017   |
| ENSG00000203817 | FAM72C     | 1.5    | 2.4    | -0.7 | 1.6 | 0.00335  |
| ENSG00000204516 | MICB       | 20.9   | 33.6   | -0.7 | 1.6 | 5.00E-05 |

|                 |             |       |       |      |     |          |
|-----------------|-------------|-------|-------|------|-----|----------|
| ENSG00000132563 | REEP2       | 1.8   | 2.9   | -0.7 | 1.6 | 0.0001   |
| ENSG00000197632 | SERPINB2    | 8.8   | 14.3  | -0.7 | 1.6 | 5.00E-05 |
| ENSG00000165905 | GYLTL1B     | 14.1  | 22.7  | -0.7 | 1.6 | 0.0029   |
| ENSG00000178980 | SEPW1       | 203.4 | 330.1 | -0.7 | 1.6 | 5.00E-05 |
| ENSG00000134762 | DSC3        | 0.5   | 0.8   | -0.7 | 1.6 | 0.0002   |
| ENSG00000153012 | LGI2        | 0.4   | 0.6   | -0.7 | 1.6 | 0.0011   |
| ENSG00000157240 | FZD1        | 0.9   | 1.5   | -0.7 | 1.6 | 5.00E-05 |
| ENSG00000146281 | PM20D2      | 2.7   | 4.4   | -0.7 | 1.6 | 5.00E-05 |
| ENSG00000184979 | USP18       | 3.0   | 4.9   | -0.7 | 1.6 | 5.00E-05 |
| ENSG00000157601 | MX1         | 8.2   | 13.6  | -0.7 | 1.6 | 5.00E-05 |
| ENSG00000105717 | PBX4        | 3.1   | 5.1   | -0.7 | 1.7 | 0.00035  |
| ENSG00000176153 | GPX2        | 62.1  | 102.9 | -0.7 | 1.7 | 0.00025  |
| ENSG00000229119 | CTB-63M22.1 | 233.9 | 388.2 | -0.7 | 1.7 | 5.00E-05 |
| ENSG00000177706 | FAM20C      | 7.7   | 12.7  | -0.7 | 1.7 | 5.00E-05 |
| ENSG00000012124 | CD22        | 0.4   | 0.6   | -0.7 | 1.7 | 0.0012   |
| ENSG00000159231 | CBR3        | 1.8   | 3.0   | -0.7 | 1.7 | 0.0018   |
| ENSG00000213886 | UBD         | 11.4  | 18.9  | -0.7 | 1.7 | 5.00E-05 |
| ENSG00000150556 | LYPD6B      | 2.4   | 4.0   | -0.7 | 1.7 | 0.0001   |
| ENSG00000127528 | KLF2        | 5.4   | 9.1   | -0.7 | 1.7 | 5.00E-05 |
| ENSG00000236824 | BCYRN1      | 0.5   | 0.8   | -0.7 | 1.7 | 5.00E-05 |
| ENSG00000101489 | CELF4       | 1.7   | 2.9   | -0.7 | 1.7 | 0.0002   |
| ENSG00000060138 | YBX3        | 148.5 | 249.1 | -0.7 | 1.7 | 5.00E-05 |
| ENSG00000153310 | FAM49B      | 45.4  | 76.3  | -0.7 | 1.7 | 5.00E-05 |
| ENSG00000182934 | SRPR        | 15.7  | 26.7  | -0.8 | 1.7 | 5.00E-05 |
| ENSG00000065268 | WDR18       | 41.9  | 71.3  | -0.8 | 1.7 | 5.00E-05 |
| ENSG00000163009 | C2orf48     | 0.9   | 1.5   | -0.8 | 1.7 | 0.001    |
| ENSG00000168350 | DEGS2       | 1.4   | 2.3   | -0.8 | 1.7 | 0.00445  |
| ENSG00000131094 | C1QL1       | 1.3   | 2.2   | -0.8 | 1.7 | 0.0009   |
| ENSG00000101096 | NFATC2      | 0.7   | 1.3   | -0.8 | 1.7 | 5.00E-05 |
| ENSG00000138614 | VWA9        | 9.7   | 16.7  | -0.8 | 1.7 | 5.00E-05 |
| ENSG00000255198 | SNHG9       | 19.0  | 32.7  | -0.8 | 1.7 | 5.00E-05 |
| ENSG00000148400 | NOTCH1      | 0.8   | 1.3   | -0.8 | 1.7 | 0.0001   |
| ENSG00000128408 | RIBC2       | 1.1   | 2.0   | -0.8 | 1.7 | 0.0032   |
| ENSG00000105559 | PLEKHA4     | 12.5  | 21.6  | -0.8 | 1.7 | 5.00E-05 |
| ENSG00000162444 | RBP7        | 3.0   | 5.2   | -0.8 | 1.7 | 0.00055  |
| ENSG00000183876 | ARSI        | 0.5   | 0.9   | -0.8 | 1.7 | 0.0024   |
| ENSG00000117318 | ID3         | 18.6  | 32.2  | -0.8 | 1.7 | 5.00E-05 |
| ENSG00000197587 | DMBX1       | 1.2   | 2.1   | -0.8 | 1.7 | 5.00E-05 |
| ENSG00000168453 | HR          | 6.6   | 11.5  | -0.8 | 1.7 | 5.00E-05 |
| ENSG00000171564 | FGB         | 1.5   | 2.7   | -0.8 | 1.8 | 5.00E-05 |
| ENSG00000181617 | FDCSP       | 342.0 | 599.0 | -0.8 | 1.8 | 5.00E-05 |

|                 |               |       |       |      |     |          |
|-----------------|---------------|-------|-------|------|-----|----------|
| ENSG00000007968 | E2F2          | 0.6   | 1.1   | -0.8 | 1.8 | 5.00E-05 |
| ENSG00000169862 | CTNND2        | 1.0   | 1.7   | -0.8 | 1.8 | 5.00E-05 |
| ENSG00000152076 | CCDC74B       | 1.0   | 1.8   | -0.8 | 1.8 | 0.001    |
| ENSG00000182240 | BACE2         | 13.9  | 24.5  | -0.8 | 1.8 | 5.00E-05 |
| ENSG00000122691 | TWIST1        | 1.1   | 1.9   | -0.8 | 1.8 | 0.0025   |
| ENSG00000134827 | TCN1          | 26.7  | 47.5  | -0.8 | 1.8 | 5.00E-05 |
| ENSG00000166682 | TMPRSS5       | 1.1   | 2.0   | -0.8 | 1.8 | 5.00E-05 |
| ENSG00000100867 | DHRS2         | 1.2   | 2.2   | -0.8 | 1.8 | 5.00E-05 |
| ENSG00000106211 | HSPB1         | 238.0 | 429.2 | -0.9 | 1.8 | 5.00E-05 |
| ENSG00000122641 | INHBA         | 2.1   | 3.8   | -0.9 | 1.8 | 5.00E-05 |
| ENSG00000132530 | XAF1          | 0.5   | 0.9   | -0.9 | 1.8 | 0.00305  |
| ENSG00000111199 | TRPV4         | 2.4   | 4.3   | -0.9 | 1.8 | 5.00E-05 |
| ENSG00000140044 | JDP2          | 8.5   | 15.5  | -0.9 | 1.8 | 5.00E-05 |
| ENSG00000230453 | ANKRD18B      | 8.4   | 15.3  | -0.9 | 1.8 | 5.00E-05 |
| ENSG00000104067 | TJP1          | 6.3   | 11.6  | -0.9 | 1.8 | 0.00035  |
| ENSG00000272010 | CTD-3025N20.3 | 1.3   | 2.5   | -0.9 | 1.8 | 0.0038   |
| ENSG00000171119 | NRTN          | 4.0   | 7.4   | -0.9 | 1.8 | 5.00E-05 |
| ENSG00000164362 | TERT          | 0.4   | 0.7   | -0.9 | 1.9 | 0.00425  |
| ENSG00000185621 | LMLN          | 0.8   | 1.4   | -0.9 | 1.9 | 0.00135  |
| ENSG00000268313 | AC119673.1    | 34.2  | 63.6  | -0.9 | 1.9 | 5.00E-05 |
| ENSG00000153993 | SEMA3D        | 0.3   | 0.6   | -0.9 | 1.9 | 0.00025  |
| ENSG00000153904 | DDAH1         | 19.1  | 35.9  | -0.9 | 1.9 | 5.00E-05 |
| ENSG00000138101 | DTNB          | 11.3  | 21.4  | -0.9 | 1.9 | 5.00E-05 |
| ENSG00000187193 | MT1X          | 27.5  | 52.5  | -0.9 | 1.9 | 5.00E-05 |
| ENSG00000122694 | GLIPR2        | 0.4   | 0.8   | -0.9 | 1.9 | 0.0014   |
| ENSG00000121207 | LRAT          | 2.5   | 4.8   | -0.9 | 1.9 | 5.00E-05 |
| ENSG00000260923 | AC137934.1    | 6.8   | 13.0  | -0.9 | 1.9 | 0.0015   |
| ENSG00000224940 | PRRT4         | 1.0   | 2.0   | -1.0 | 2.0 | 5.00E-05 |
| ENSG00000156113 | KCNMA1        | 0.6   | 1.2   | -1.0 | 2.0 | 0.003    |
| ENSG00000111335 | OAS2          | 1.3   | 2.7   | -1.0 | 2.0 | 0.004    |
| ENSG00000005513 | SOX8          | 0.4   | 0.9   | -1.0 | 2.0 | 0.0002   |
| ENSG00000156535 | CD109         | 0.3   | 0.5   | -1.0 | 2.0 | 0.0017   |
| ENSG00000133030 | MPRIP         | 76.9  | 153.5 | -1.0 | 2.0 | 5.00E-05 |
| ENSG00000004399 | PLXND1        | 35.5  | 71.1  | -1.0 | 2.0 | 5.00E-05 |
| ENSG00000021762 | OSBPL5        | 0.5   | 1.0   | -1.0 | 2.0 | 0.0027   |
| ENSG00000269430 | LRRC3DN       | 0.2   | 0.4   | -1.0 | 2.0 | 0.0016   |
| ENSG00000127863 | TNFRSF19      | 1.8   | 3.6   | -1.0 | 2.0 | 5.00E-05 |
| ENSG00000178162 | AC140481.1    | 0.2   | 0.4   | -1.1 | 2.1 | 0.0029   |
| ENSG00000125148 | MT2A          | 15.1  | 32.7  | -1.1 | 2.2 | 5.00E-05 |
| ENSG00000271824 | AC009014.3    | 1.0   | 2.1   | -1.1 | 2.2 | 5.00E-05 |
| ENSG00000197406 | DIO3          | 2.3   | 5.1   | -1.1 | 2.2 | 5.00E-05 |

|                 |               |       |       |      |     |          |
|-----------------|---------------|-------|-------|------|-----|----------|
| ENSG00000064300 | NGFR          | 0.3   | 0.6   | -1.1 | 2.2 | 0.0002   |
| ENSG00000198183 | BPIFA1        | 1.6   | 3.6   | -1.2 | 2.2 | 5.00E-05 |
| ENSG00000157765 | SLC34A2       | 0.6   | 1.3   | -1.2 | 2.2 | 5.00E-05 |
| ENSG00000249242 | TMEM150C      | 0.2   | 0.5   | -1.2 | 2.3 | 0.00135  |
| ENSG00000092758 | COL9A3        | 1.4   | 3.3   | -1.2 | 2.3 | 0.00165  |
| ENSG00000197903 | HIST1H2BK     | 52.4  | 122.1 | -1.2 | 2.3 | 5.00E-05 |
| ENSG00000109099 | PMP22         | 0.4   | 0.9   | -1.2 | 2.4 | 0.00025  |
| ENSG00000161570 | CCL5          | 0.3   | 0.6   | -1.3 | 2.5 | 0.0012   |
| ENSG00000263934 | SNORD3A       | 348.7 | 897.8 | -1.4 | 2.6 | 5.00E-05 |
| ENSG00000154027 | AK5           | 0.3   | 0.8   | -1.5 | 2.8 | 0.0009   |
| ENSG00000241549 | GUSBP2        | 1.6   | 4.9   | -1.7 | 3.2 | 0.0016   |
| ENSG00000178776 | C5orf46       | 0.3   | 0.9   | -1.7 | 3.3 | 0.00205  |
| ENSG00000198417 | MT1F          | 7.2   | 26.3  | -1.9 | 3.6 | 5.00E-05 |
| ENSG00000177359 | RP11-551L14.1 | 0.6   | 4.0   | -2.6 | 6.2 | 5.00E-05 |
| ENSG00000169429 | IL8*          | 19.1  | 26.7  | -0.5 | 1.4 | 5.00E-05 |
| ENSG00000119139 | TJP2*         | 18.4  | 12.7  | 0.5  | 0.7 | 5.00E-05 |

\*Genes referred to in the text that showed a significant but less than 1.5-fold change in expression in siRNA mediated EHF knockdown versus negative control Calu-3 cells.



| Table S6. List of enriched gene pathways from DAVID gene ontology analysis of significantly differentially expressed genes with >1.5-fold change in expression following EHF depletion. |             |                                                                                                                                                                                                                                                                                                                         |
|-----------------------------------------------------------------------------------------------------------------------------------------------------------------------------------------|-------------|-------------------------------------------------------------------------------------------------------------------------------------------------------------------------------------------------------------------------------------------------------------------------------------------------------------------------|
| Term                                                                                                                                                                                    | PValue      | Genes                                                                                                                                                                                                                                                                                                                   |
| GO:0030855~epithelial cell differentiation                                                                                                                                              | 6.85E-05    | RHCG, KRT5, SPRR1A, SPRR1B, KRT14, FZD1, EHF, CSTA, ID3, KRT4                                                                                                                                                                                                                                                           |
| GO:0045682~regulation of epidermis development                                                                                                                                          | 1.61E-04    | INHBA, NOTCH1, TRIM16, NGFR, AQP3                                                                                                                                                                                                                                                                                       |
| GO:0005576~extracellular region                                                                                                                                                         | 6.17E-04    | CXCL1, NRTN, NRG4, CXCL5, FAM3D, MSMB, ARSI, FAM20C, CD109, PRSS1, CXCL6, CCL5, SCGB1A1, MMP1, AZGP1, GLIPR2, C5ORF46, COL17A1, BDNF, PRRG4, COL9A3, FGB, SBSN, SERPINE1, SEMA3D, SFTPC, LGI2, PRSS33, SFTPB, MATN3, HAPLN3, LAD1, TCN1, NTN1, INHBA, SERPINF1, SRPX2, SFTPA2, C1QL1, SERPINB2, AREG, CMTM4, AGR2, PLAU |
| GO:0060429~epithelium development                                                                                                                                                       | 7.13E-04    | RHCG, KRT5, SPRR1A, SPRR1B, KRT14, FZD1, EHF, CSTA, ID3, KRT4, TWIST1                                                                                                                                                                                                                                                   |
| GO:0007398~ectoderm development                                                                                                                                                         | 0.001089007 | KRT6A, COL17A1, NOTCH1, KRT5, KRT16, SPRR1A, SPRR1B, KRT14, CSTA, NGFR                                                                                                                                                                                                                                                  |
| GO:0008544~epidermis development                                                                                                                                                        | 0.002608863 | COL17A1, NOTCH1, KRT5, KRT16, SPRR1A, SPRR1B, KRT14, CSTA, NGFR                                                                                                                                                                                                                                                         |
| GO:0007626~locomotory behavior                                                                                                                                                          | 0.002899408 | KCNMA1, CXCL1, DMBX1, CXCL5, GRIN1, S100A9, C1QL1, CXCL6, CMTM4, CCL5, PLAU                                                                                                                                                                                                                                             |
| GO:0007610~behavior                                                                                                                                                                     | 0.00296785  | CXCL1, KCNMA1, DMBX1, S100P, CXCL5, S100A9, GRIN1, CTNND2, CXCL6, CCL5, BDNF, C1QL1, CMTM4, SHC3, PLAU                                                                                                                                                                                                                  |
| GO:0009611~response to wounding                                                                                                                                                         | 0.003509121 | CXCL1, S100A8, S100A9, CHST2, ITGA2, CHST4, CXCL6, CCL5, NOTCH1, FGB, SERPINE1, SERPINB2, MGLL, ID3, NGFR, PLAU                                                                                                                                                                                                         |
| GO:0032101~regulation of response to external stimulus                                                                                                                                  | 0.004469944 | GPX2, SERPINF1, GRIN1, SERPINE1, ITGA2, CCL5, SCGB1A1, PLAU                                                                                                                                                                                                                                                             |
| GO:0051241~negative regulation of multicellular organismal process                                                                                                                      | 0.005288313 | KCNMA1, INHBA, NOTCH1, GNAI2, SERPINE1, NGFR, SCGB1A1, PLAU                                                                                                                                                                                                                                                             |
| GO:0042127~regulation of cell proliferation                                                                                                                                             | 0.006057187 | CXCL1, KRT6A, GNAI2, CXCL5, ITGA2, NTN1, SCGB1A1, MYCN, AZGP1, DHRS2, NOTCH1, BDNF, CDKN1A, KRT5, SERPINE1, NGFR, KRT4, PMP22, ICOSLG, PLAU                                                                                                                                                                             |
| GO:0044421~extracellular region part                                                                                                                                                    | 0.007417859 | CXCL1, MATN3, HAPLN3, LAD1, CXCL5, MSMB, PRSS1, CD109, CXCL6, CCL5, NTN1, MMP1, INHBA, COL17A1, COL9A3, SERPINF1, FGB, SFTPA2, SERPINB2, SFTPC, AREG, CMTM4, SFTPB                                                                                                                                                      |
| GO:0006970~response to osmotic stress                                                                                                                                                   | 0.007888697 | KCNMA1, TRPV4, ITGA2, ICOSLG                                                                                                                                                                                                                                                                                            |
| GO:0045616~regulation of keratinocyte differentiation                                                                                                                                   | 0.008382668 | NOTCH1, TRIM16, AQP3                                                                                                                                                                                                                                                                                                    |
| GO:0006928~cell motion                                                                                                                                                                  | 0.008431952 | NRTN, S100P, S100A9, ITGA2, CHST4, CCL5, NTN1, TPM3, BDNF, HSPB1, NGFR, PLAU, S100A2, TWIST1                                                                                                                                                                                                                            |

|                                                             |             |                                                                                                                                                |
|-------------------------------------------------------------|-------------|------------------------------------------------------------------------------------------------------------------------------------------------|
| GO:0033273~response to vitamin                              | 0.010261122 | CYP24A1, MICB, ITGA2, TRIM16, AQP3                                                                                                             |
| GO:0007267~cell-cell signaling                              | 0.010616919 | KCNMA1, CXCL5, S100A9, GRIN1, FZD1, CHST4, CXCL6, CCL5, INHBA, BDNF, SYPL1, BHLHA15, TRPV4, AREG, PMP22, SHC3                                  |
| GO:0005125~cytokine activity                                | 0.011541164 | CXCL1, INHBA, FAM3D, CXCL5, CXCL6, AREG, CMTM4, CCL5                                                                                           |
| GO:0006884~cell volume homeostasis                          | 0.013523298 | SLC12A6, KCNMA1, TRPV4                                                                                                                         |
| GO:0045604~regulation of epidermal cell differentiation     | 0.013523298 | NOTCH1, TRIM16, AQP3                                                                                                                           |
| GO:0043066~negative regulation of apoptosis                 | 0.016285402 | DHRS2, CDKN1A, BDNF, NOTCH1, HIPK3, GRIN1, SERPINB2, HSPB1, NGFR, BIRC3, TERT                                                                  |
| GO:0050727~regulation of inflammatory response              | 0.016554541 | GPX2, SERPINF1, ITGA2, CCL5, SCGB1A1                                                                                                           |
| GO:0042592~homeostatic process                              | 0.016693547 | SLC12A6, KCNMA1, SEPW1, GRIN1, ITGA2, CCL5, SLC34A2, GPX2, INHBA, SERINC5, GYLTL1B, RHCG, BHLHA15, MT2A, SERPINE1, TRPV4, PMP22, TERT          |
| GO:0006935~chemotaxis                                       | 0.017284984 | CXCL1, CXCL5, S100A9, CXCL6, CMTM4, CCL5, PLAU                                                                                                 |
| GO:0042330~taxis                                            | 0.017284984 | CXCL1, CXCL5, S100A9, CXCL6, CMTM4, CCL5, PLAU                                                                                                 |
| GO:0043069~negative regulation of programmed cell death     | 0.017780392 | DHRS2, CDKN1A, BDNF, NOTCH1, HIPK3, GRIN1, SERPINB2, HSPB1, NGFR, BIRC3, TERT                                                                  |
| GO:0060548~negative regulation of cell death                | 0.018091186 | DHRS2, CDKN1A, BDNF, NOTCH1, HIPK3, GRIN1, SERPINB2, HSPB1, NGFR, BIRC3, TERT                                                                  |
| GO:0008009~chemokine activity                               | 0.019881564 | CXCL1, CXCL5, CXCL6, CCL5                                                                                                                      |
| GO:0050768~negative regulation of neurogenesis              | 0.019992178 | BDNF, RTN4R, NGFR, NTN1                                                                                                                        |
| GO:0050767~regulation of neurogenesis                       | 0.020331091 | BDNF, NOTCH1, SERPINF1, GRIN1, RTN4R, NGFR, NTN1                                                                                               |
| GO:0004857~enzyme inhibitor activity                        | 0.020679989 | CDKN1A, SERPINF1, SERPINE1, SERPINB2, CD109, CSTA, SCGB1A1, PKIA, TWIST1                                                                       |
| GO:0009628~response to abiotic stimulus                     | 0.020723889 | KCNMA1, MICB, CDKN1A, GRIN1, KRT14, DDB2, HSPB1, TRPV4, ITGA2, NGFR, ICOSLG                                                                    |
| GO:0005509~calcium ion binding                              | 0.021655328 | GALNT3, KCNMA1, S100P, S100A8, ARSI, GRIN1, FAM20C, S100A9, PRSS1, ITGA2, MMP1, NOTCH1, PRRG4, SFTPA2, DSC3, DTNB, EFCAB2, DSC2, TRPV4, S100A2 |
| GO:0042379~chemokine receptor binding                       | 0.023484341 | CXCL1, CXCL5, CXCL6, CCL5                                                                                                                      |
| GO:0010721~negative regulation of cell development          | 0.023699431 | BDNF, RTN4R, NGFR, NTN1                                                                                                                        |
| GO:0051799~negative regulation of hair follicle development | 0.025559926 | INHBA, NGFR                                                                                                                                    |
| GO:0006971~hypotonic response                               | 0.025559926 | TRPV4, ITGA2                                                                                                                                   |
| GO:0048589~developmental growth                             | 0.025788477 | DMBX1, NOTCH1, SERPINE1, CYFIP1, PLAU                                                                                                          |
| GO:0017171~serine hydrolase activity                        | 0.026024769 | NCEH1, SERPINE1, PRSS1, SERPINB2, PRSS33, TMPRSS5, PLAU                                                                                        |

|                                                         |             |                                                                                                                  |
|---------------------------------------------------------|-------------|------------------------------------------------------------------------------------------------------------------|
| GO:0070161~anchoring junction                           | 0.026058385 | TNS4, TJP1, PKP1, CTNND2, DSC3, ITGA2, DSC2                                                                      |
| GO:0051094~positive regulation of developmental process | 0.027412635 | INHBA, BDNF, NOTCH1, SERPINF1, TRIM16, NGFR, CCL5, DDAH1, NTN1                                                   |
| GO:0031344~regulation of cell projection organization   | 0.027740919 | GRIN1, RTN4R, ITGA2, NGFR, NTN1                                                                                  |
| GO:0030057~desmosome                                    | 0.027940525 | PKP1, DSC3, DSC2                                                                                                 |
| GO:0045664~regulation of neuron differentiation         | 0.028630228 | BDNF, NOTCH1, GRIN1, RTN4R, NGFR, NTN1                                                                           |
| GO:0045597~positive regulation of cell differentiation  | 0.028688082 | INHBA, BDNF, NOTCH1, SERPINF1, TRIM16, NGFR, CCL5, NTN1                                                          |
| GO:0044092~negative regulation of molecular function    | 0.028839339 | CDKN1A, FICD, GNAI2, GNAI1, HIPK3, HR, CSTA, ID3, UBE2D1, PKIA                                                   |
| GO:0001533~cornified envelope                           | 0.033395385 | SPRR1A, SPRR1B, CSTA                                                                                             |
| GO:0007584~response to nutrient                         | 0.034614604 | CYP24A1, MICB, GNAI2, ITGA2, TRIM16, AQP3                                                                        |
| GO:0050878~regulation of body fluid levels              | 0.035528104 | KCNMA1, FGB, SERPINE1, ITGA2, AGR2, PLAU                                                                         |
| GO:0005615~extracellular space                          | 0.036188885 | CXCL1, CXCL5, MSMB, PRSS1, CD109, CXCL6, CCL5, INHBA, SERPINF1, FGB, SFTPA2, SERPINB2, SFTPC, AREG, CMTM4, SFTPB |
| GO:0050770~regulation of axonogenesis                   | 0.036894035 | GRIN1, RTN4R, NGFR, NTN1                                                                                         |
| GO:0051960~regulation of nervous system development     | 0.037868918 | BDNF, NOTCH1, SERPINF1, GRIN1, RTN4R, NGFR, NTN1                                                                 |
| GO:0019725~cellular homeostasis                         | 0.038481239 | SLC12A6, KCNMA1, SEPW1, SERINC5, GYLTL1B, RHCG, MT2A, GRIN1, TRPV4, PMP22, CCL5, SLC34A2                         |
| GO:0050769~positive regulation of neurogenesis          | 0.040243057 | NOTCH1, SERPINF1, NGFR, NTN1                                                                                     |
| GO:0021675~nerve development                            | 0.040663649 | BDNF, NRTN, NGFR                                                                                                 |
| GO:0050771~negative regulation of axonogenesis          | 0.040663649 | RTN4R, NGFR, NTN1                                                                                                |
| GO:0021700~developmental maturation                     | 0.041276904 | KCNMA1, NOTCH1, BHLHA15, GRIN1, SOX8                                                                             |
| GO:0051969~regulation of transmission of nerve impulse  | 0.041321632 | BDNF, S100P, GNAI2, GRIN1, CTNND2, ITGA2                                                                         |
| GO:0043296~apical junction complex                      | 0.041438171 | TJP1, PKP1, DSC3, DSC2, PMP22                                                                                    |
| GO:0018149~peptide cross-linking                        | 0.043687732 | SPRR1A, SPRR1B, CSTA                                                                                             |
| GO:0004252~serine-type endopeptidase activity           | 0.04471012  | SERPINE1, PRSS1, SERPINB2, PRSS33, TMPRSS5, PLAU                                                                 |
| GO:0010817~regulation of hormone levels                 | 0.045329742 | DHRS2, LRAT, CYP1B1, DIO3, BACE2, TRPV4                                                                          |
| GO:0016327~apicolateral plasma membrane                 | 0.045410206 | TJP1, PKP1, DSC3, DSC2, PMP22                                                                                    |
| GO:0044057~regulation of system process                 | 0.046470503 | KCNMA1, INHBA, BDNF, S100P, GNAI2, GRIN1, CTNND2, ITGA2, TPM3                                                    |
| GO:0031644~regulation of neurological system process    | 0.047473756 | BDNF, S100P, GNAI2, GRIN1, CTNND2, ITGA2                                                                         |
| GO:0042445~hormone metabolic                            | 0.047846491 | DHRS2, LRAT, CYP1B1, DIO3, BACE2                                                                                 |

|                                                                  |             |                                                                                                                                 |
|------------------------------------------------------------------|-------------|---------------------------------------------------------------------------------------------------------------------------------|
| process                                                          |             |                                                                                                                                 |
| GO:0048167~regulation of synaptic plasticity                     | 0.049261832 | BDNF, S100P, GRIN1, CTNND2                                                                                                      |
| GO:0060284~regulation of cell development                        | 0.049269588 | BDNF, NOTCH1, SERPINF1, GRIN1, RTN4R, NGFR, NTN1                                                                                |
| GO:0010035~response to inorganic substance                       | 0.049269588 | KCNMA1, CDKN1A, FGB, SERPINE1, KRT14, AQP3, MT1X                                                                                |
| GO:0004090~carbonyl reductase (NADPH) activity                   | 0.049287246 | DHRS2, CBR3                                                                                                                     |
| GO:0031345~negative regulation of cell projection organization   | 0.049976041 | RTN4R, NGFR, NTN1                                                                                                               |
| GO:0006916~anti-apoptosis                                        | 0.050954825 | BDNF, HIPK3, SERPINB2, HSPB1, NGFR, BIRC3, TERT                                                                                 |
| GO:0016323~basolateral plasma membrane                           | 0.051012745 | TNS4, SLC12A6, COL17A1, TJP1, RHCG, ITGA2, AQP3                                                                                 |
| GO:0012505~endomembrane system                                   | 0.052066229 | SEC23A, CYP1B1, SLC33A1, CHST2, ERLIN1, CHST4, PIP5K1A, NUPL1, SENP2, DHRS2, ERO1LB, SRPR, CACYBP, NUP54, DOLPP1, SEC24D, DEGS2 |
| GO:0008083~growth factor activity                                | 0.052302717 | CXCL1, INHBA, BDNF, NRTN, NRG4, AREG                                                                                            |
| GO:0006873~cellular ion homeostasis                              | 0.052669053 | SLC12A6, KCNMA1, SERINC5, RHCG, MT2A, GRIN1, TRPV4, PMP22, CCL5, SLC34A2                                                        |
| GO:0030856~regulation of epithelial cell differentiation         | 0.053235208 | NOTCH1, TRIM16, AQP3                                                                                                            |
| GO:0007611~learning or memory                                    | 0.054961999 | BDNF, S100P, GRIN1, CTNND2, SHC3                                                                                                |
| GO:0055082~cellular chemical homeostasis                         | 0.057107494 | SLC12A6, KCNMA1, SERINC5, RHCG, MT2A, GRIN1, TRPV4, PMP22, CCL5, SLC34A2                                                        |
| GO:0015296~anion:cation symporter activity                       | 0.057456812 | SLC12A6, SLC4A7, SLC34A2                                                                                                        |
| GO:0010720~positive regulation of cell development               | 0.059178398 | NOTCH1, SERPINF1, NGFR, NTN1                                                                                                    |
| GO:0031099~regeneration                                          | 0.059178398 | CDKN1A, NOTCH1, SERPINE1, PLAU                                                                                                  |
| GO:0045596~negative regulation of cell differentiation           | 0.06047139  | INHBA, BDNF, NOTCH1, RTN4R, NGFR, NTN1, TWIST1                                                                                  |
| GO:0008430~selenium binding                                      | 0.060795385 | GPX2, SEPW1, DIO3                                                                                                               |
| GO:0001517~N-acetylglucosamine 6-O-sulfotransferase activity     | 0.061227009 | CHST2, CHST4                                                                                                                    |
| GO:0010975~regulation of neuron projection development           | 0.06126625  | GRIN1, RTN4R, NGFR, NTN1                                                                                                        |
| GO:0045606~positive regulation of epidermal cell differentiation | 0.062686866 | NOTCH1, TRIM16                                                                                                                  |
| GO:0045618~positive regulation of keratinocyte differentiation   | 0.062686866 | NOTCH1, TRIM16                                                                                                                  |
| GO:0045683~negative regulation of epidermis development          | 0.062686866 | INHBA, NGFR                                                                                                                     |
| GO:0042246~tissue regeneration                                   | 0.063443479 | NOTCH1, SERPINE1, PLAU                                                                                                          |
| GO:0005789~endoplasmic reticulum membrane                        | 0.064716573 | ERO1LB, CYP1B1, SLC33A1, SRPR, ERLIN1, DOLPP1, SEC24D, DEGS2                                                                    |

|                                                                         |             |                                                                                                                                               |
|-------------------------------------------------------------------------|-------------|-----------------------------------------------------------------------------------------------------------------------------------------------|
| GO:0009991~response to extracellular stimulus                           | 0.065556044 | CYP24A1, MICB, CDKN1A, GNAI2, ITGA2, TRIM16, AQP3                                                                                             |
| GO:0016477~cell migration                                               | 0.065945622 | NRTN, S100P, S100A9, CCL5, NTN1, PLAU, S100A2, TWIST1                                                                                         |
| GO:0005200~structural constituent of cytoskeleton                       | 0.066043876 | KRT6A, KRT5, KRT16, KRT14                                                                                                                     |
| GO:0048878~chemical homeostasis                                         | 0.066615003 | SLC12A6, KCNMA1, SERINC5, RHCG, BHLHA15, MT2A, GRIN1, SERPINE1, TRPV4, PMP22, CCL5, SLC34A2                                                   |
| GO:0043086~negative regulation of catalytic activity                    | 0.066940416 | CDKN1A, FICD, GNAI2, GNAI1, HIPK3, CSTA, UBE2D1, PKIA                                                                                         |
| GO:0032526~response to retinoic acid                                    | 0.06698198  | MICB, TRIM16, AQP3                                                                                                                            |
| GO:0001763~morphogenesis of a branching structure                       | 0.069955223 | NOTCH1, CTNND2, PLXND1, MYCN                                                                                                                  |
| GO:0016779~nucleotidyltransferase activity                              | 0.072501207 | FICD, POLE2, OAS3, OAS2, TERT                                                                                                                 |
| GO:0008236~serine-type peptidase activity                               | 0.074012513 | SERPINE1, PRSS1, SERPINB2, PRSS33, TMPRSS5, PLAU                                                                                              |
| GO:0042634~regulation of hair cycle                                     | 0.074747243 | INHBA, NGFR                                                                                                                                   |
| GO:0051797~regulation of hair follicle development                      | 0.074747243 | INHBA, NGFR                                                                                                                                   |
| GO:0010769~regulation of cell morphogenesis involved in differentiation | 0.076816494 | GRIN1, RTN4R, NGFR, NTN1                                                                                                                      |
| GO:0031348~negative regulation of defense response                      | 0.077973096 | GPX2, MICB, SERPINF1                                                                                                                          |
| GO:0007585~respiratory gaseous exchange                                 | 0.077973096 | SFTPA2, SFTPC, SFTPB                                                                                                                          |
| GO:0030054~cell junction                                                | 0.079814762 | TNS4, COL17A1, TJP1, PKP1, GRIN1, SYT12, CTNND2, DSC3, CYFIP1, ITGA2, DSC2, PMP22                                                             |
| GO:0005783~endoplasmic reticulum                                        | 0.080125101 | SEC23A, NCEH1, CYP1B1, SLC33A1, UBE2J1, RTN4R, ERLIN1, OAS2, ALDH3A1, ERO1LB, SERINC5, LRAT, SHISA2, SRPR, BACE2, DOLPP1, AGR2, SEC24D, DEGS2 |
| GO:0042175~nuclear envelope-endoplasmic reticulum network               | 0.08108359  | ERO1LB, CYP1B1, SLC33A1, SRPR, ERLIN1, DOLPP1, SEC24D, DEGS2                                                                                  |
| GO:0050801~ion homeostasis                                              | 0.081931268 | SLC12A6, KCNMA1, SERINC5, RHCG, MT2A, GRIN1, TRPV4, PMP22, CCL5, SLC34A2                                                                      |
| GO:0010038~response to metal ion                                        | 0.084988099 | KCNMA1, FGB, KRT14, AQP3, MT1X                                                                                                                |
| GO:0070011~peptidase activity, acting on L-amino acid peptides          | 0.085207207 | SEN2, USP18, BACE2, PM20D2, SERPINE1, PRSS1, SERPINB2, PRSS33, LMLN, TMPRSS5, MMP1, PLAU                                                      |
| GO:0008284~positive regulation of cell proliferation                    | 0.086783827 | CDKN1A, KRT6A, NOTCH1, GNAI2, CXCL5, ITGA2, NGFR, NTN1, ICOSLG, MYCN                                                                          |
| GO:0040007~growth                                                       | 0.087500967 | DMBX1, INHBA, NOTCH1, SERPINE1, CYFIP1, PLAU                                                                                                  |
| GO:0022604~regulation of cell morphogenesis                             | 0.088735293 | GRIN1, RTN4R, CYFIP1, NGFR, NTN1                                                                                                              |
| GO:0002683~negative regulation of                                       | 0.091380877 | GPX2, INHBA, MICB, SCGB1A1                                                                                                                    |

|                                                      |             |                                                                                                                  |
|------------------------------------------------------|-------------|------------------------------------------------------------------------------------------------------------------|
| immune system process                                |             |                                                                                                                  |
| GO:0005882~intermediate filament                     | 0.093508939 | KRT6A, PKP1, KRT5, KRT16, KRT14, KRT4                                                                            |
| GO:0042981~regulation of apoptosis                   | 0.094410082 | KCNMA1, GRIN1, BIRC3, INHBA, DHRS2, NOTCH1, BDNF, CDKN1A, HIPK3, SERPINB2, HSPB1, TNFRSF19, ID3, NGFR, MX1, TERT |
| GO:0008285~negative regulation of cell proliferation | 0.09465443  | CXCL1, AZGP1, DHRS2, CDKN1A, BDNF, KRT5, KRT4, PMP22, SCGB1A1                                                    |
| GO:0050804~regulation of synaptic transmission       | 0.098445286 | BDNF, S100P, GNAI2, GRIN1, CTNND2                                                                                |
| GO:0042060~wound healing                             | 0.099997985 | NOTCH1, FGB, SERPINE1, SERPINB2, ITGA2, PLAU                                                                     |

Table S7. List of transcripts differentially expressed by at least 1.5-fold in EHF-overexpressing versus pcDNA control A549 clones.

| Gene ID         | Gene Name     | FPKM            |               | Log2<br>(fold change) | Fold<br>Change | P value  |
|-----------------|---------------|-----------------|---------------|-----------------------|----------------|----------|
|                 |               | pcDNA<br>clones | EHF<br>clones |                       |                |          |
| ENSG00000250846 | RP11-807H7.1  | 3.8             | 0.1           | 6.2                   | 0.0            | 5.00E-05 |
| ENSG00000198542 | ITGBL1        | 1.2             | 0.0           | 6.0                   | 0.0            | 5.00E-05 |
| ENSG00000140538 | NTRK3         | 21.4            | 1.2           | 4.1                   | 0.1            | 5.00E-05 |
| ENSG00000162624 | LHX8          | 9.1             | 0.6           | 3.9                   | 0.1            | 5.00E-05 |
| ENSG00000135744 | AGT           | 5.7             | 0.4           | 3.7                   | 0.1            | 5.00E-05 |
| ENSG00000196757 | ZNF700        | 0.6             | 0.0           | 3.6                   | 0.1            | 5.00E-05 |
| ENSG00000261717 | RP11-77K12.1  | 2.9             | 0.2           | 3.6                   | 0.1            | 0.00175  |
| ENSG00000169439 | SDC2          | 3.9             | 0.4           | 3.4                   | 0.1            | 5.00E-05 |
| ENSG00000265404 | AC099796.1    | 77.8            | 7.5           | 3.4                   | 0.1            | 0.00555  |
| ENSG00000101134 | DOK5          | 1.2             | 0.1           | 3.3                   | 0.1            | 0.00025  |
| ENSG00000144476 | ACKR3         | 2.2             | 0.2           | 3.2                   | 0.1            | 5.00E-05 |
| ENSG00000156298 | TSPAN7        | 14.9            | 1.6           | 3.2                   | 0.1            | 5.00E-05 |
| ENSG00000066032 | CTNNA2        | 1.5             | 0.2           | 3.1                   | 0.1            | 5.00E-05 |
| ENSG00000228439 | TSTD3         | 11.9            | 1.5           | 3.0                   | 0.1            | 0.0051   |
| ENSG00000239389 | PCDHA13       | 0.8             | 0.1           | 3.0                   | 0.1            | 0.0023   |
| ENSG00000151892 | GFRA1         | 1.2             | 0.2           | 3.0                   | 0.1            | 5.00E-05 |
| ENSG00000188916 | FAM196A       | 0.8             | 0.1           | 3.0                   | 0.1            | 0.00035  |
| ENSG00000099998 | GGT5          | 1.1             | 0.2           | 2.8                   | 0.1            | 5.00E-05 |
| ENSG00000160471 | COX6B2        | 1.1             | 0.2           | 2.8                   | 0.1            | 5.00E-05 |
| ENSG00000164741 | DLC1          | 0.8             | 0.1           | 2.8                   | 0.1            | 5.00E-05 |
| ENSG00000052850 | ALX4          | 1.4             | 0.2           | 2.7                   | 0.2            | 5.00E-05 |
| ENSG00000119283 | TRIM67        | 1.0             | 0.1           | 2.7                   | 0.2            | 5.00E-05 |
| ENSG00000021826 | CPS1          | 41.4            | 6.6           | 2.6                   | 0.2            | 5.00E-05 |
| ENSG00000198203 | SULT1C2       | 8.7             | 1.5           | 2.6                   | 0.2            | 5.00E-05 |
| ENSG00000109819 | PPARGC1A      | 2.7             | 0.5           | 2.5                   | 0.2            | 5.00E-05 |
| ENSG00000224149 | RP11-510C10.3 | 1.4             | 0.3           | 2.4                   | 0.2            | 0.0001   |
| ENSG00000116774 | OLFML3        | 12.6            | 2.4           | 2.4                   | 0.2            | 5.00E-05 |
| ENSG00000123243 | ITIH5         | 1.0             | 0.2           | 2.4                   | 0.2            | 5.00E-05 |
| ENSG00000150594 | ADRA2A        | 0.7             | 0.2           | 2.3                   | 0.2            | 5.00E-05 |
| ENSG00000180767 | CHST13        | 1.5             | 0.3           | 2.3                   | 0.2            | 5.00E-05 |
| ENSG00000151388 | ADAMTS12      | 1.4             | 0.3           | 2.3                   | 0.2            | 5.00E-05 |
| ENSG00000250305 | KIAA1456      | 0.4             | 0.1           | 2.2                   | 0.2            | 5.00E-05 |
| ENSG00000261115 | TMEM178B      | 1.0             | 0.2           | 2.1                   | 0.2            | 5.00E-05 |
| ENSG00000151490 | PTPRO         | 0.5             | 0.1           | 2.1                   | 0.2            | 5.00E-05 |
| ENSG00000143473 | KCNH1         | 1.1             | 0.3           | 2.1                   | 0.2            | 5.00E-05 |
| ENSG00000102032 | RENBP         | 1.7             | 0.4           | 2.1                   | 0.2            | 5.00E-05 |
| ENSG00000110169 | HPX           | 1.8             | 0.4           | 2.0                   | 0.2            | 5.00E-05 |
| ENSG00000169918 | OTUD7A        | 0.4             | 0.1           | 2.0                   | 0.2            | 5.00E-05 |
| ENSG00000165023 | DIRAS2        | 0.4             | 0.1           | 2.0                   | 0.3            | 5.00E-05 |
| ENSG00000101197 | BIRC7         | 4.3             | 1.1           | 2.0                   | 0.3            | 5.00E-05 |
| ENSG00000134769 | DTNA          | 1.1             | 0.3           | 2.0                   | 0.3            | 5.00E-05 |

|                 |               |       |      |     |     |          |
|-----------------|---------------|-------|------|-----|-----|----------|
| ENSG00000246877 | DNM1P35       | 0.6   | 0.1  | 2.0 | 0.3 | 5.00E-05 |
| ENSG00000144908 | ALDH1L1       | 0.5   | 0.1  | 1.9 | 0.3 | 5.00E-05 |
| ENSG00000133636 | NTS           | 104.6 | 27.2 | 1.9 | 0.3 | 5.00E-05 |
| ENSG00000104081 | BMF           | 1.8   | 0.5  | 1.9 | 0.3 | 5.00E-05 |
| ENSG00000064205 | WISP2         | 4.6   | 1.2  | 1.9 | 0.3 | 5.00E-05 |
| ENSG00000180066 | C10orf91      | 12.3  | 3.3  | 1.9 | 0.3 | 5.00E-05 |
| ENSG00000089250 | NOS1          | 0.3   | 0.1  | 1.9 | 0.3 | 5.00E-05 |
| ENSG00000224596 | ZMIZ1-AS1     | 0.6   | 0.2  | 1.8 | 0.3 | 5.00E-05 |
| ENSG00000196368 | NUDT11        | 1.0   | 0.3  | 1.8 | 0.3 | 5.00E-05 |
| ENSG00000101198 | NKAIN4        | 1.8   | 0.5  | 1.8 | 0.3 | 5.00E-05 |
| ENSG00000250799 | PRODH2        | 1.1   | 0.3  | 1.8 | 0.3 | 0.00045  |
| ENSG00000166073 | GPR176        | 1.8   | 0.5  | 1.7 | 0.3 | 5.00E-05 |
| ENSG00000223749 | MIR503HG      | 7.0   | 2.1  | 1.7 | 0.3 | 5.00E-05 |
| ENSG00000135253 | KCP           | 1.9   | 0.6  | 1.7 | 0.3 | 0.0019   |
| ENSG00000197106 | SLC6A17       | 0.3   | 0.1  | 1.7 | 0.3 | 5.00E-05 |
| ENSG00000095383 | TBC1D2        | 14.0  | 4.3  | 1.7 | 0.3 | 5.00E-05 |
| ENSG00000149571 | KIRREL3       | 2.0   | 0.6  | 1.7 | 0.3 | 5.00E-05 |
| ENSG00000130222 | GADD45G       | 1.8   | 0.6  | 1.7 | 0.3 | 5.00E-05 |
| ENSG00000108924 | HLF           | 0.7   | 0.2  | 1.7 | 0.3 | 5.00E-05 |
| ENSG00000068831 | RASGRP2       | 0.4   | 0.1  | 1.7 | 0.3 | 0.00045  |
| ENSG00000196668 | LINC00173     | 2.8   | 0.9  | 1.7 | 0.3 | 0.0001   |
| ENSG00000167693 | NXN           | 11.7  | 3.7  | 1.7 | 0.3 | 5.00E-05 |
| ENSG00000170965 | PLAC1         | 1.7   | 0.5  | 1.6 | 0.3 | 5.00E-05 |
| ENSG00000182870 | GALNT9        | 1.4   | 0.5  | 1.6 | 0.3 | 5.00E-05 |
| ENSG00000133019 | CHRM3         | 1.4   | 0.5  | 1.6 | 0.3 | 0.00045  |
| ENSG00000146592 | CREB5         | 1.0   | 0.3  | 1.6 | 0.3 | 5.00E-05 |
| ENSG00000136881 | BAAT          | 23.2  | 7.7  | 1.6 | 0.3 | 5.00E-05 |
| ENSG00000109846 | CRYAB         | 42.4  | 14.1 | 1.6 | 0.3 | 5.00E-05 |
| ENSG00000187634 | SAMD11        | 8.7   | 2.9  | 1.6 | 0.3 | 0.0086   |
| ENSG00000147697 | GSDMC         | 0.5   | 0.2  | 1.5 | 0.3 | 0.002    |
| ENSG00000095066 | HOOK2         | 22.5  | 7.8  | 1.5 | 0.3 | 5.00E-05 |
| ENSG00000095752 | IL11          | 7.6   | 2.6  | 1.5 | 0.3 | 5.00E-05 |
| ENSG00000185345 | PARK2         | 0.4   | 0.2  | 1.5 | 0.3 | 0.00125  |
| ENSG00000231107 | RP11-389K14.3 | 1.4   | 0.5  | 1.5 | 0.4 | 0.0001   |
| ENSG00000249196 | RP11-669N7.2  | 1.9   | 0.7  | 1.5 | 0.4 | 0.00835  |
| ENSG00000107518 | ATRNL1        | 0.9   | 0.3  | 1.5 | 0.4 | 5.00E-05 |
| ENSG00000166106 | ADAMTS15      | 0.7   | 0.2  | 1.5 | 0.4 | 5.00E-05 |
| ENSG00000099994 | SUSD2         | 4.7   | 1.7  | 1.5 | 0.4 | 5.00E-05 |
| ENSG00000165507 | C10orf10      | 1.7   | 0.6  | 1.5 | 0.4 | 0.00285  |
| ENSG00000026751 | SLAMF7        | 3.9   | 1.4  | 1.5 | 0.4 | 5.00E-05 |
| ENSG00000196605 | ZNF846        | 1.7   | 0.6  | 1.5 | 0.4 | 0.0001   |
| ENSG00000020181 | GPR124        | 1.0   | 0.4  | 1.5 | 0.4 | 0.0073   |
| ENSG00000143502 | SUSD4         | 3.2   | 1.2  | 1.5 | 0.4 | 5.00E-05 |
| ENSG00000262454 | RP11-65J21.3  | 3.9   | 1.4  | 1.5 | 0.4 | 0.0002   |
| ENSG00000169255 | B3GALNT1      | 0.5   | 0.2  | 1.5 | 0.4 | 0.00065  |



|                 |               |       |      |     |     |          |
|-----------------|---------------|-------|------|-----|-----|----------|
| ENSG00000110076 | NRXN2         | 0.4   | 0.1  | 1.5 | 0.4 | 5.00E-05 |
| ENSG00000250303 | RP11-356J5.12 | 6.1   | 2.2  | 1.5 | 0.4 | 5.00E-05 |
| ENSG00000066468 | FGFR2         | 0.5   | 0.2  | 1.4 | 0.4 | 5.00E-05 |
| ENSG00000088538 | DOCK3         | 1.9   | 0.7  | 1.4 | 0.4 | 5.00E-05 |
| ENSG00000077092 | RARB          | 2.2   | 0.8  | 1.4 | 0.4 | 5.00E-05 |
| ENSG00000104324 | CPQ           | 3.3   | 1.2  | 1.4 | 0.4 | 5.00E-05 |
| ENSG00000091513 | TF            | 9.9   | 3.7  | 1.4 | 0.4 | 5.00E-05 |
| ENSG00000136244 | IL6           | 2.1   | 0.8  | 1.4 | 0.4 | 5.00E-05 |
| ENSG00000182256 | GABRG3        | 0.4   | 0.1  | 1.4 | 0.4 | 0.0003   |
| ENSG00000184845 | DRD1          | 0.6   | 0.2  | 1.4 | 0.4 | 0.00075  |
| ENSG00000115353 | TACR1         | 1.0   | 0.4  | 1.4 | 0.4 | 0.00405  |
| ENSG00000198125 | MB            | 3.3   | 1.2  | 1.4 | 0.4 | 5.00E-05 |
| ENSG00000221955 | SLC12A8       | 0.6   | 0.2  | 1.4 | 0.4 | 0.00045  |
| ENSG00000225138 | CTD-2228K2.7  | 28.8  | 11.2 | 1.4 | 0.4 | 5.00E-05 |
| ENSG00000119865 | CNRIP1        | 1.3   | 0.5  | 1.4 | 0.4 | 0.00655  |
| ENSG00000114948 | ADAM23        | 4.5   | 1.8  | 1.4 | 0.4 | 0.0001   |
| ENSG00000235169 | SMIM1         | 0.8   | 0.3  | 1.4 | 0.4 | 0.0015   |
| ENSG00000128564 | VGF           | 3.0   | 1.2  | 1.3 | 0.4 | 5.00E-05 |
| ENSG00000234311 | RP11-432J24.3 | 4.4   | 1.7  | 1.3 | 0.4 | 5.00E-05 |
| ENSG00000147614 | ATP6V0D2      | 0.7   | 0.3  | 1.3 | 0.4 | 5.00E-05 |
| ENSG00000151136 | BTBD11        | 9.1   | 3.6  | 1.3 | 0.4 | 5.00E-05 |
| ENSG00000171119 | NRTN          | 2.0   | 0.8  | 1.3 | 0.4 | 5.00E-05 |
| ENSG00000156113 | KCNMA1        | 4.9   | 1.9  | 1.3 | 0.4 | 0.0001   |
| ENSG00000137731 | FXD2          | 94.9  | 38.0 | 1.3 | 0.4 | 5.00E-05 |
| ENSG00000124564 | SLC17A3       | 7.5   | 3.0  | 1.3 | 0.4 | 5.00E-05 |
| ENSG00000132718 | SYT11         | 0.8   | 0.3  | 1.3 | 0.4 | 0.00025  |
| ENSG00000134207 | SYT6          | 1.8   | 0.7  | 1.3 | 0.4 | 0.002    |
| ENSG00000176928 | GCNT4         | 1.0   | 0.4  | 1.3 | 0.4 | 0.00225  |
| ENSG00000258654 | RP11-509A17.3 | 0.6   | 0.2  | 1.3 | 0.4 | 0.00195  |
| ENSG00000003989 | SLC7A2        | 30.6  | 12.5 | 1.3 | 0.4 | 5.00E-05 |
| ENSG00000147872 | PLIN2         | 195.0 | 80.3 | 1.3 | 0.4 | 5.00E-05 |
| ENSG00000078018 | MAP2          | 7.7   | 3.2  | 1.3 | 0.4 | 5.00E-05 |
| ENSG00000153294 | GPR115        | 8.4   | 3.5  | 1.3 | 0.4 | 5.00E-05 |
| ENSG00000129910 | CDH15         | 0.5   | 0.2  | 1.3 | 0.4 | 0.00225  |
| ENSG00000124813 | RUNX2         | 0.5   | 0.2  | 1.3 | 0.4 | 0.00245  |
| ENSG00000256258 | RP11-495K9.9  | 0.6   | 0.2  | 1.3 | 0.4 | 0.0074   |
| ENSG00000113083 | LOX           | 3.0   | 1.2  | 1.3 | 0.4 | 0.0086   |
| ENSG00000152377 | SPOCK1        | 0.8   | 0.3  | 1.3 | 0.4 | 0.00245  |
| ENSG00000164379 | FOXQ1         | 9.7   | 4.0  | 1.3 | 0.4 | 5.00E-05 |
| ENSG00000166923 | GREM1         | 29.0  | 12.1 | 1.3 | 0.4 | 5.00E-05 |
| ENSG00000125869 | LAMP5         | 1.0   | 0.4  | 1.3 | 0.4 | 0.0001   |
| ENSG0000015413  | DPEP1         | 1.1   | 0.5  | 1.2 | 0.4 | 0.00135  |
| ENSG00000135917 | SLC19A3       | 5.1   | 2.2  | 1.2 | 0.4 | 5.00E-05 |
| ENSG00000117016 | RIMS3         | 0.8   | 0.3  | 1.2 | 0.4 | 5.00E-05 |
| ENSG00000136630 | HLX           | 1.9   | 0.8  | 1.2 | 0.4 | 0.00035  |

|                 |               |      |      |     |     |          |
|-----------------|---------------|------|------|-----|-----|----------|
| ENSG00000182600 | C2orf82       | 24.7 | 10.5 | 1.2 | 0.4 | 0.00015  |
| ENSG00000188897 | CTD-3088G3.8  | 0.7  | 0.3  | 1.2 | 0.4 | 0.0006   |
| ENSG00000108387 | SEPT4         | 1.4  | 0.6  | 1.2 | 0.4 | 5.00E-05 |
| ENSG00000105605 | CACNG7        | 1.3  | 0.6  | 1.2 | 0.4 | 5.00E-05 |
| ENSG00000132563 | REEP2         | 1.9  | 0.8  | 1.2 | 0.4 | 5.00E-05 |
| ENSG00000115363 | EVA1A         | 4.1  | 1.7  | 1.2 | 0.4 | 0.0001   |
| ENSG00000174899 | C3orf55       | 3.5  | 1.5  | 1.2 | 0.4 | 0.00255  |
| ENSG00000185070 | FLRT2         | 1.4  | 0.6  | 1.2 | 0.4 | 0.00025  |
| ENSG00000115380 | EFEMP1        | 19.2 | 8.4  | 1.2 | 0.4 | 5.00E-05 |
| ENSG00000181495 | AC026703.1    | 5.6  | 2.5  | 1.2 | 0.4 | 0.0005   |
| ENSG00000130208 | APOC1         | 18.6 | 8.2  | 1.2 | 0.4 | 5.00E-05 |
| ENSG00000187867 | PALM3         | 0.4  | 0.2  | 1.2 | 0.4 | 0.009    |
| ENSG00000133069 | TMCC2         | 1.4  | 0.6  | 1.2 | 0.4 | 5.00E-05 |
| ENSG00000197766 | CFD           | 67.1 | 30.0 | 1.2 | 0.4 | 5.00E-05 |
| ENSG00000150347 | ARID5B        | 2.7  | 1.2  | 1.2 | 0.4 | 5.00E-05 |
| ENSG00000171791 | BCL2          | 1.7  | 0.7  | 1.2 | 0.4 | 0.0021   |
| ENSG00000178821 | TMEM52        | 0.6  | 0.3  | 1.2 | 0.4 | 0.00145  |
| ENSG00000079931 | MOXD1         | 1.4  | 0.6  | 1.1 | 0.5 | 0.0001   |
| ENSG00000183570 | PCBP3         | 0.8  | 0.4  | 1.1 | 0.5 | 0.00025  |
| ENSG00000115596 | WNT6          | 0.8  | 0.3  | 1.1 | 0.5 | 0.0021   |
| ENSG00000100342 | APOL1         | 13.0 | 5.9  | 1.1 | 0.5 | 5.00E-05 |
| ENSG00000259974 | LINC00261     | 3.5  | 1.6  | 1.1 | 0.5 | 5.00E-05 |
| ENSG00000124568 | SLC17A1       | 1.0  | 0.5  | 1.1 | 0.5 | 0.00045  |
| ENSG00000185760 | KCNQ5         | 0.5  | 0.2  | 1.1 | 0.5 | 0.003    |
| ENSG00000259343 | RP11-76114.3  | 4.2  | 1.9  | 1.1 | 0.5 | 0.0086   |
| ENSG00000227619 | RP11-492E3.2  | 0.6  | 0.3  | 1.1 | 0.5 | 0.0013   |
| ENSG00000134533 | RERG          | 2.0  | 0.9  | 1.1 | 0.5 | 0.0001   |
| ENSG00000129946 | SHC2          | 4.4  | 2.1  | 1.1 | 0.5 | 5.00E-05 |
| ENSG00000151117 | TMEM86A       | 0.8  | 0.4  | 1.1 | 0.5 | 0.00075  |
| ENSG00000144681 | STAC          | 5.1  | 2.4  | 1.1 | 0.5 | 5.00E-05 |
| ENSG00000180739 | S1PR5         | 0.5  | 0.2  | 1.1 | 0.5 | 0.00985  |
| ENSG00000077420 | APBB1IP       | 1.2  | 0.6  | 1.1 | 0.5 | 0.0031   |
| ENSG00000267279 | RP11-879F14.2 | 1.2  | 0.6  | 1.1 | 0.5 | 0.0085   |
| ENSG00000149380 | P4HA3         | 11.1 | 5.2  | 1.1 | 0.5 | 0.00545  |
| ENSG00000146374 | RSPO3         | 27.2 | 12.8 | 1.1 | 0.5 | 5.00E-05 |
| ENSG00000166473 | PKD1L2        | 9.3  | 4.4  | 1.1 | 0.5 | 5.00E-05 |
| ENSG00000183098 | GPC6          | 3.7  | 1.7  | 1.1 | 0.5 | 5.00E-05 |
| ENSG00000090661 | CERS4         | 6.3  | 3.0  | 1.1 | 0.5 | 5.00E-05 |
| ENSG00000115226 | FNDC4         | 0.8  | 0.4  | 1.1 | 0.5 | 0.00245  |
| ENSG00000219755 | RP1-199J3.5   | 0.7  | 0.3  | 1.1 | 0.5 | 0.00785  |
| ENSG00000154134 | ROBO3         | 2.9  | 1.4  | 1.1 | 0.5 | 5.00E-05 |
| ENSG00000126353 | CCR7          | 0.8  | 0.4  | 1.1 | 0.5 | 0.0027   |
| ENSG00000104888 | SLC17A7       | 0.5  | 0.2  | 1.1 | 0.5 | 0.00125  |
| ENSG00000103485 | QPRT          | 0.8  | 0.4  | 1.1 | 0.5 | 0.00855  |
| ENSG00000114923 | SLC4A3        | 0.8  | 0.4  | 1.1 | 0.5 | 0.0005   |

|                 |              |       |       |     |     |          |
|-----------------|--------------|-------|-------|-----|-----|----------|
| ENSG00000171368 | TPPP         | 1.0   | 0.5   | 1.0 | 0.5 | 0.00245  |
| ENSG00000092096 | SLC22A17     | 6.0   | 2.9   | 1.0 | 0.5 | 5.00E-05 |
| ENSG00000218336 | TENM3        | 1.1   | 0.5   | 1.0 | 0.5 | 0.0018   |
| ENSG00000019144 | PHLDB1       | 2.5   | 1.2   | 1.0 | 0.5 | 5.00E-05 |
| ENSG00000155816 | FMN2         | 1.3   | 0.6   | 1.0 | 0.5 | 0.002    |
| ENSG00000153208 | MERTK        | 1.7   | 0.8   | 1.0 | 0.5 | 0.00015  |
| ENSG00000186642 | PDE2A        | 1.3   | 0.6   | 1.0 | 0.5 | 5.00E-05 |
| ENSG00000161249 | DMKN         | 24.0  | 11.7  | 1.0 | 0.5 | 5.00E-05 |
| ENSG00000164733 | CTSB         | 558.4 | 274.2 | 1.0 | 0.5 | 5.00E-05 |
| ENSG00000213694 | S1PR3        | 17.2  | 8.5   | 1.0 | 0.5 | 5.00E-05 |
| ENSG00000072163 | LIMS2        | 0.9   | 0.5   | 1.0 | 0.5 | 0.001    |
| ENSG00000139269 | INHBE        | 3.2   | 1.6   | 1.0 | 0.5 | 5.00E-05 |
| ENSG00000101210 | EEF1A2       | 157.7 | 77.8  | 1.0 | 0.5 | 5.00E-05 |
| ENSG00000223764 | RP11-5407.3  | 0.9   | 0.4   | 1.0 | 0.5 | 0.0002   |
| ENSG00000062282 | DGAT2        | 1.6   | 0.8   | 1.0 | 0.5 | 0.00435  |
| ENSG00000173210 | ABLIM3       | 21.7  | 10.8  | 1.0 | 0.5 | 5.00E-05 |
| ENSG00000100307 | CBX7         | 3.3   | 1.6   | 1.0 | 0.5 | 5.00E-05 |
| ENSG00000237950 | RP11-7011.3  | 1.2   | 0.6   | 1.0 | 0.5 | 0.00755  |
| ENSG00000130147 | SH3BP4       | 20.9  | 10.5  | 1.0 | 0.5 | 5.00E-05 |
| ENSG00000175866 | BAIAP2       | 14.7  | 7.4   | 1.0 | 0.5 | 5.00E-05 |
| ENSG00000144583 | MARCH4       | 0.6   | 0.3   | 1.0 | 0.5 | 0.00095  |
| ENSG00000226674 | TEX41        | 12.9  | 6.5   | 1.0 | 0.5 | 0.00135  |
| ENSG00000169220 | RGS14        | 6.7   | 3.4   | 1.0 | 0.5 | 0.0016   |
| ENSG00000169856 | ONECUT1      | 0.7   | 0.3   | 1.0 | 0.5 | 0.00455  |
| ENSG00000183722 | LHFP         | 3.1   | 1.6   | 1.0 | 0.5 | 0.00045  |
| ENSG00000127561 | SYNGR3       | 10.4  | 5.2   | 1.0 | 0.5 | 0.0001   |
| ENSG00000135549 | PKIB         | 28.0  | 14.1  | 1.0 | 0.5 | 5.00E-05 |
| ENSG00000025708 | TYMP         | 15.2  | 7.7   | 1.0 | 0.5 | 0.0001   |
| ENSG00000073670 | ADAM11       | 0.5   | 0.3   | 1.0 | 0.5 | 0.00125  |
| ENSG00000197857 | ZNF44        | 0.8   | 0.4   | 1.0 | 0.5 | 0.0032   |
| ENSG00000182771 | GRID1        | 1.1   | 0.6   | 1.0 | 0.5 | 0.0008   |
| ENSG00000130720 | FIBCD1       | 7.9   | 4.0   | 1.0 | 0.5 | 0.0065   |
| ENSG00000118257 | NRP2         | 27.0  | 13.9  | 1.0 | 0.5 | 5.00E-05 |
| ENSG00000102271 | KLHL4        | 2.8   | 1.4   | 1.0 | 0.5 | 0.00015  |
| ENSG00000168398 | BDKRB2       | 12.5  | 6.4   | 1.0 | 0.5 | 5.00E-05 |
| ENSG00000131409 | LRRC4B       | 1.0   | 0.5   | 1.0 | 0.5 | 0.00125  |
| ENSG00000186648 | LRRC16B      | 0.5   | 0.3   | 1.0 | 0.5 | 0.0029   |
| ENSG00000230176 | RP4-779E11.3 | 2.3   | 1.2   | 0.9 | 0.5 | 0.0048   |
| ENSG00000224189 | HOXD-AS1     | 1.5   | 0.8   | 0.9 | 0.5 | 0.00685  |
| ENSG00000186897 | C1QL4        | 1.5   | 0.8   | 0.9 | 0.5 | 0.00065  |
| ENSG00000105255 | FSD1         | 2.6   | 1.4   | 0.9 | 0.5 | 0.00035  |
| ENSG00000070182 | SPTB         | 0.9   | 0.5   | 0.9 | 0.5 | 0.00885  |
| ENSG00000247746 | USP51        | 0.9   | 0.5   | 0.9 | 0.5 | 0.0005   |
| ENSG00000205795 | CYS1         | 0.5   | 0.3   | 0.9 | 0.5 | 0.00595  |
| ENSG00000147100 | SLC16A2      | 5.6   | 2.9   | 0.9 | 0.5 | 5.00E-05 |

|                 |               |       |       |     |     |          |
|-----------------|---------------|-------|-------|-----|-----|----------|
| ENSG00000198729 | PPP1R14C      | 1.6   | 0.9   | 0.9 | 0.5 | 0.0033   |
| ENSG00000012124 | CD22          | 6.8   | 3.6   | 0.9 | 0.5 | 5.00E-05 |
| ENSG00000170469 | SPATA24       | 4.6   | 2.4   | 0.9 | 0.5 | 0.0017   |
| ENSG00000174951 | FUT1          | 1.9   | 1.0   | 0.9 | 0.5 | 5.00E-05 |
| ENSG00000232176 | RP11-146N23.1 | 8.8   | 4.6   | 0.9 | 0.5 | 0.0021   |
| ENSG00000127948 | POR           | 187.6 | 99.1  | 0.9 | 0.5 | 5.00E-05 |
| ENSG00000167680 | SEMA6B        | 4.8   | 2.6   | 0.9 | 0.5 | 5.00E-05 |
| ENSG00000177932 | ZNF354C       | 0.9   | 0.5   | 0.9 | 0.5 | 0.0013   |
| ENSG00000146678 | IGFBP1        | 405.5 | 215.9 | 0.9 | 0.5 | 5.00E-05 |
| ENSG00000115828 | QPCT          | 67.8  | 36.1  | 0.9 | 0.5 | 5.00E-05 |
| ENSG00000137273 | FOXF2         | 5.4   | 2.9   | 0.9 | 0.5 | 5.00E-05 |
| ENSG00000261578 | RP11-21L23.2  | 14.0  | 7.5   | 0.9 | 0.5 | 5.00E-05 |
| ENSG00000170425 | ADORA2B       | 10.5  | 5.6   | 0.9 | 0.5 | 5.00E-05 |
| ENSG00000154678 | PDE1C         | 4.3   | 2.3   | 0.9 | 0.5 | 5.00E-05 |
| ENSG00000133805 | AMPD3         | 4.9   | 2.6   | 0.9 | 0.5 | 5.00E-05 |
| ENSG00000115257 | PCSK4         | 1.2   | 0.7   | 0.9 | 0.5 | 0.00355  |
| ENSG00000154027 | AK5           | 7.2   | 3.9   | 0.9 | 0.5 | 0.0018   |
| ENSG00000100292 | HMOX1         | 171.5 | 93.4  | 0.9 | 0.5 | 5.00E-05 |
| ENSG00000173698 | GPR64         | 4.9   | 2.7   | 0.9 | 0.5 | 5.00E-05 |
| ENSG00000221890 | NPTXR         | 16.0  | 8.7   | 0.9 | 0.5 | 5.00E-05 |
| ENSG00000112183 | RBM24         | 9.4   | 5.1   | 0.9 | 0.5 | 5.00E-05 |
| ENSG00000164690 | SHH           | 3.6   | 2.0   | 0.9 | 0.5 | 0.00015  |
| ENSG00000011028 | MRC2          | 15.1  | 8.3   | 0.9 | 0.5 | 5.00E-05 |
| ENSG00000113389 | NPR3          | 9.7   | 5.3   | 0.9 | 0.5 | 0.0001   |
| ENSG00000184524 | CEND1         | 1.0   | 0.5   | 0.9 | 0.5 | 0.00555  |
| ENSG00000004660 | CAMKK1        | 8.1   | 4.4   | 0.9 | 0.5 | 5.00E-05 |
| ENSG00000169031 | COL4A3        | 5.0   | 2.7   | 0.9 | 0.5 | 0.00955  |
| ENSG00000176720 | BOK           | 2.7   | 1.5   | 0.9 | 0.6 | 5.00E-05 |
| ENSG00000116833 | NR5A2         | 20.1  | 11.1  | 0.9 | 0.6 | 5.00E-05 |
| ENSG00000240184 | PCDHGC3       | 2.1   | 1.2   | 0.9 | 0.6 | 0.00775  |
| ENSG00000223573 | TINCR         | 1.8   | 1.0   | 0.9 | 0.6 | 0.0003   |
| ENSG00000056487 | PHF21B        | 0.5   | 0.3   | 0.9 | 0.6 | 0.0031   |
| ENSG00000260604 | RP1-140K8.5   | 0.4   | 0.2   | 0.9 | 0.6 | 0.00415  |
| ENSG00000178860 | MSC           | 53.2  | 29.5  | 0.9 | 0.6 | 5.00E-05 |
| ENSG00000115194 | SLC30A3       | 1.2   | 0.7   | 0.9 | 0.6 | 0.00195  |
| ENSG00000144730 | IL17RD        | 0.5   | 0.3   | 0.8 | 0.6 | 0.00315  |
| ENSG00000142871 | CYR61         | 14.5  | 8.0   | 0.8 | 0.6 | 5.00E-05 |
| ENSG00000187094 | CCK           | 2.2   | 1.2   | 0.8 | 0.6 | 0.00295  |
| ENSG00000108840 | HDAC5         | 13.3  | 7.4   | 0.8 | 0.6 | 5.00E-05 |
| ENSG00000117114 | LPHN2         | 7.8   | 4.4   | 0.8 | 0.6 | 5.00E-05 |
| ENSG00000006071 | ABCC8         | 1.0   | 0.6   | 0.8 | 0.6 | 0.00085  |
| ENSG00000118596 | SLC16A7       | 5.8   | 3.2   | 0.8 | 0.6 | 0.003    |
| ENSG00000204869 | IGFL4         | 4.3   | 2.4   | 0.8 | 0.6 | 0.0004   |
| ENSG00000171873 | ADRA1D        | 2.6   | 1.5   | 0.8 | 0.6 | 0.0008   |
| ENSG00000103145 | HCFC1R1       | 71.5  | 40.1  | 0.8 | 0.6 | 5.00E-05 |

|                 |             |       |       |     |     |          |
|-----------------|-------------|-------|-------|-----|-----|----------|
| ENSG00000124613 | ZNF391      | 0.4   | 0.2   | 0.8 | 0.6 | 0.0081   |
| ENSG00000226328 | CTA-217C2.1 | 7.3   | 4.1   | 0.8 | 0.6 | 0.00275  |
| ENSG00000114270 | COL7A1      | 47.9  | 26.9  | 0.8 | 0.6 | 5.00E-05 |
| ENSG00000057593 | F7          | 8.4   | 4.7   | 0.8 | 0.6 | 5.00E-05 |
| ENSG00000134030 | CTIF        | 11.0  | 6.2   | 0.8 | 0.6 | 5.00E-05 |
| ENSG00000165029 | ABCA1       | 3.5   | 2.0   | 0.8 | 0.6 | 0.0001   |
| ENSG00000231767 | MIR4426     | 47.7  | 26.9  | 0.8 | 0.6 | 5.00E-05 |
| ENSG00000178947 | LINC00086   | 0.9   | 0.5   | 0.8 | 0.6 | 0.0015   |
| ENSG00000149150 | SLC43A1     | 11.9  | 6.7   | 0.8 | 0.6 | 5.00E-05 |
| ENSG00000138207 | RBP4        | 25.1  | 14.1  | 0.8 | 0.6 | 5.00E-05 |
| ENSG00000189058 | APOD        | 3.3   | 1.9   | 0.8 | 0.6 | 0.0008   |
| ENSG00000153233 | PTPRR       | 1.9   | 1.1   | 0.8 | 0.6 | 0.00325  |
| ENSG00000110328 | GALNT18     | 5.0   | 2.8   | 0.8 | 0.6 | 0.0032   |
| ENSG00000087076 | HSD17B14    | 40.4  | 22.9  | 0.8 | 0.6 | 5.00E-05 |
| ENSG00000105971 | CAV2        | 108.0 | 61.4  | 0.8 | 0.6 | 0.00215  |
| ENSG00000176046 | NUPR1       | 79.2  | 45.1  | 0.8 | 0.6 | 5.00E-05 |
| ENSG00000187955 | COL14A1     | 0.4   | 0.2   | 0.8 | 0.6 | 0.0059   |
| ENSG00000143369 | ECM1        | 2.1   | 1.2   | 0.8 | 0.6 | 0.00115  |
| ENSG00000124615 | MOCS1       | 0.8   | 0.5   | 0.8 | 0.6 | 0.0028   |
| ENSG00000221968 | FADS3       | 30.5  | 17.5  | 0.8 | 0.6 | 5.00E-05 |
| ENSG00000183087 | GAS6        | 5.3   | 3.0   | 0.8 | 0.6 | 5.00E-05 |
| ENSG00000134013 | LOXL2       | 46.7  | 26.9  | 0.8 | 0.6 | 0.00015  |
| ENSG00000119547 | ONECUT2     | 1.2   | 0.7   | 0.8 | 0.6 | 5.00E-05 |
| ENSG00000155265 | GOLGA7B     | 4.9   | 2.8   | 0.8 | 0.6 | 0.0001   |
| ENSG00000122870 | BICC1       | 21.4  | 12.3  | 0.8 | 0.6 | 5.00E-05 |
| ENSG00000259803 | SLC22A31    | 5.1   | 2.9   | 0.8 | 0.6 | 0.0052   |
| ENSG00000122694 | GLIPR2      | 2.1   | 1.2   | 0.8 | 0.6 | 0.0062   |
| ENSG00000169554 | ZEB2        | 3.0   | 1.8   | 0.8 | 0.6 | 5.00E-05 |
| ENSG00000156587 | UBE2L6      | 14.1  | 8.2   | 0.8 | 0.6 | 5.00E-05 |
| ENSG00000130203 | APOE        | 6.2   | 3.6   | 0.8 | 0.6 | 0.0006   |
| ENSG00000116729 | WLS         | 19.2  | 11.2  | 0.8 | 0.6 | 0.00965  |
| ENSG00000106617 | PRKAG2      | 31.2  | 18.3  | 0.8 | 0.6 | 5.00E-05 |
| ENSG00000138769 | CDKL2       | 1.6   | 0.9   | 0.8 | 0.6 | 0.0039   |
| ENSG00000114771 | AADAC       | 14.5  | 8.5   | 0.8 | 0.6 | 0.0007   |
| ENSG00000026508 | CD44        | 230.1 | 135.0 | 0.8 | 0.6 | 5.00E-05 |
| ENSG00000113739 | STC2        | 81.6  | 48.0  | 0.8 | 0.6 | 5.00E-05 |
| ENSG00000250479 | CHCHD10     | 146.4 | 86.2  | 0.8 | 0.6 | 5.00E-05 |
| ENSG00000111799 | COL12A1     | 3.7   | 2.2   | 0.8 | 0.6 | 0.0008   |
| ENSG00000184489 | PTP4A3      | 7.9   | 4.7   | 0.8 | 0.6 | 0.00015  |
| ENSG00000135116 | HRK         | 0.9   | 0.5   | 0.8 | 0.6 | 0.00515  |
| ENSG00000182704 | TSKU        | 298.0 | 176.3 | 0.8 | 0.6 | 5.00E-05 |
| ENSG00000197043 | ANXA6       | 29.4  | 17.4  | 0.8 | 0.6 | 5.00E-05 |
| ENSG00000173706 | HEG1        | 14.4  | 8.6   | 0.7 | 0.6 | 0.00015  |
| ENSG00000085662 | AKR1B1      | 992.2 | 592.9 | 0.7 | 0.6 | 5.00E-05 |
| ENSG00000133816 | MICAL2      | 20.5  | 12.3  | 0.7 | 0.6 | 5.00E-05 |

|                 |           |       |       |     |     |          |
|-----------------|-----------|-------|-------|-----|-----|----------|
| ENSG00000235034 | C19orf81  | 12.2  | 7.3   | 0.7 | 0.6 | 0.0055   |
| ENSG00000100167 | SEPT3     | 1.0   | 0.6   | 0.7 | 0.6 | 0.0032   |
| ENSG00000026559 | KCNG1     | 11.2  | 6.7   | 0.7 | 0.6 | 0.0002   |
| ENSG00000198853 | RUSC2     | 27.8  | 16.9  | 0.7 | 0.6 | 5.00E-05 |
| ENSG00000173221 | GLRX      | 434.2 | 263.7 | 0.7 | 0.6 | 5.00E-05 |
| ENSG00000123685 | BATF3     | 9.0   | 5.5   | 0.7 | 0.6 | 0.0033   |
| ENSG00000053747 | LAMA3     | 7.1   | 4.3   | 0.7 | 0.6 | 5.00E-05 |
| ENSG00000105835 | NAMPT     | 306.9 | 187.7 | 0.7 | 0.6 | 5.00E-05 |
| ENSG00000175344 | CHRNA7    | 0.7   | 0.4   | 0.7 | 0.6 | 0.0037   |
| ENSG00000117984 | CTSD      | 729.3 | 446.6 | 0.7 | 0.6 | 5.00E-05 |
| ENSG00000227051 | C14orf132 | 5.4   | 3.3   | 0.7 | 0.6 | 0.00065  |
| ENSG00000138166 | DUSP5     | 64.2  | 39.5  | 0.7 | 0.6 | 5.00E-05 |
| ENSG00000164951 | PDP1      | 9.4   | 5.8   | 0.7 | 0.6 | 5.00E-05 |
| ENSG00000184986 | TMEM121   | 1.9   | 1.2   | 0.7 | 0.6 | 0.0088   |
| ENSG00000146233 | CYP39A1   | 7.4   | 4.6   | 0.7 | 0.6 | 0.0036   |
| ENSG00000203867 | RBM20     | 0.9   | 0.5   | 0.7 | 0.6 | 0.00895  |
| ENSG00000118402 | ELOVL4    | 2.8   | 1.8   | 0.7 | 0.6 | 0.00205  |
| ENSG00000104725 | NEFL      | 2.1   | 1.3   | 0.7 | 0.6 | 0.0032   |
| ENSG00000152270 | PDE3B     | 3.7   | 2.3   | 0.7 | 0.6 | 0.0001   |
| ENSG00000106366 | SERPINE1  | 53.7  | 33.5  | 0.7 | 0.6 | 5.00E-05 |
| ENSG00000213362 | FTH1P12   | 40.2  | 25.1  | 0.7 | 0.6 | 5.00E-05 |
| ENSG00000141542 | RAB40B    | 17.8  | 11.1  | 0.7 | 0.6 | 0.00065  |
| ENSG00000111962 | UST       | 10.5  | 6.6   | 0.7 | 0.6 | 0.0003   |
| ENSG00000150764 | DIXDC1    | 3.4   | 2.2   | 0.7 | 0.6 | 0.00015  |
| ENSG00000104870 | FCGRT     | 21.4  | 13.4  | 0.7 | 0.6 | 5.00E-05 |
| ENSG00000145730 | PAM       | 29.6  | 18.6  | 0.7 | 0.6 | 5.00E-05 |
| ENSG00000187601 | MAGEH1    | 6.6   | 4.1   | 0.7 | 0.6 | 0.0007   |
| ENSG00000163083 | INHBB     | 38.8  | 24.4  | 0.7 | 0.6 | 5.00E-05 |
| ENSG00000143512 | HHIPL2    | 19.1  | 12.0  | 0.7 | 0.6 | 0.0001   |
| ENSG00000186806 | VSIG10L   | 4.6   | 2.9   | 0.7 | 0.6 | 0.00085  |
| ENSG00000229644 | NAMPTL    | 94.4  | 59.7  | 0.7 | 0.6 | 0.0001   |
| ENSG00000099822 | HCN2      | 17.9  | 11.3  | 0.7 | 0.6 | 5.00E-05 |
| ENSG00000183688 | FAM101B   | 3.5   | 2.2   | 0.7 | 0.6 | 0.00065  |
| ENSG00000131196 | NFATC1    | 1.9   | 1.2   | 0.7 | 0.6 | 0.0061   |
| ENSG00000159263 | SIM2      | 4.1   | 2.6   | 0.7 | 0.6 | 0.00025  |
| ENSG00000148926 | ADM       | 36.5  | 23.2  | 0.7 | 0.6 | 5.00E-05 |
| ENSG00000178773 | CPNE7     | 25.1  | 16.0  | 0.6 | 0.6 | 0.00185  |
| ENSG00000177707 | PVRL3     | 24.6  | 15.7  | 0.6 | 0.6 | 5.00E-05 |
| ENSG00000105928 | DFNA5     | 28.1  | 17.9  | 0.6 | 0.6 | 5.00E-05 |
| ENSG00000069424 | KCNAB2    | 21.7  | 13.9  | 0.6 | 0.6 | 5.00E-05 |
| ENSG00000182379 | NXPH4     | 2.7   | 1.7   | 0.6 | 0.6 | 0.0058   |
| ENSG00000153395 | LPCAT1    | 35.4  | 22.7  | 0.6 | 0.6 | 5.00E-05 |
| ENSG00000025434 | NR1H3     | 17.0  | 10.9  | 0.6 | 0.6 | 0.0038   |
| ENSG00000123700 | KCNJ2     | 1.6   | 1.0   | 0.6 | 0.6 | 0.00525  |
| ENSG00000151726 | ACSL1     | 19.5  | 12.5  | 0.6 | 0.6 | 5.00E-05 |

|                 |           |       |       |      |     |          |
|-----------------|-----------|-------|-------|------|-----|----------|
| ENSG00000165996 | PTPLA     | 53.1  | 34.2  | 0.6  | 0.6 | 5.00E-05 |
| ENSG00000198053 | SIRPA     | 11.9  | 7.7   | 0.6  | 0.6 | 5.00E-05 |
| ENSG00000223361 | FTH1P10   | 41.6  | 26.8  | 0.6  | 0.6 | 0.0015   |
| ENSG00000120708 | TGFBI     | 129.2 | 83.3  | 0.6  | 0.6 | 5.00E-05 |
| ENSG00000074370 | ATP2A3    | 3.8   | 2.4   | 0.6  | 0.6 | 0.00015  |
| ENSG00000158825 | CDA       | 19.0  | 12.3  | 0.6  | 0.6 | 0.0006   |
| ENSG00000245060 | LINC00847 | 13.2  | 8.6   | 0.6  | 0.6 | 0.00025  |
| ENSG00000089486 | CDIP1     | 6.4   | 4.1   | 0.6  | 0.6 | 0.0006   |
| ENSG00000140519 | RHCG      | 9.4   | 6.1   | 0.6  | 0.7 | 0.00025  |
| ENSG00000125148 | MT2A      | 91.7  | 59.6  | 0.6  | 0.7 | 5.00E-05 |
| ENSG00000107968 | MAP3K8    | 13.7  | 8.9   | 0.6  | 0.7 | 0.00255  |
| ENSG00000153815 | CMIP      | 36.9  | 24.1  | 0.6  | 0.7 | 0.0005   |
| ENSG00000130635 | COL5A1    | 4.8   | 3.1   | 0.6  | 0.7 | 5.00E-05 |
| ENSG00000141753 | IGFBP4    | 742.7 | 485.5 | 0.6  | 0.7 | 5.00E-05 |
| ENSG00000222009 | BTBD19    | 5.4   | 3.5   | 0.6  | 0.7 | 0.0033   |
| ENSG00000154511 | FAM69A    | 9.5   | 6.2   | 0.6  | 0.7 | 0.0004   |
| ENSG00000102409 | BEX4      | 10.8  | 7.1   | 0.6  | 0.7 | 0.00625  |
| ENSG00000167994 | RAB3IL1   | 15.4  | 10.1  | 0.6  | 0.7 | 5.00E-05 |
| ENSG00000111252 | SH2B3     | 3.4   | 2.3   | 0.6  | 0.7 | 0.0003   |
| ENSG00000146038 | DCDC2     | 15.2  | 10.0  | 0.6  | 0.7 | 5.00E-05 |
| ENSG00000204175 | GPRIN2    | 20.4  | 13.4  | 0.6  | 0.7 | 0.0001   |
| ENSG00000160867 | FGFR4     | 31.3  | 20.6  | 0.6  | 0.7 | 5.00E-05 |
| ENSG00000197355 | UAP1L1    | 15.5  | 10.2  | 0.6  | 0.7 | 5.00E-05 |
| ENSG00000241839 | PLEKH02   | 3.3   | 2.2   | 0.6  | 0.7 | 0.0071   |
| ENSG00000101928 | MOSPD1    | 35.2  | 23.2  | 0.6  | 0.7 | 0.0001   |
| ENSG00000164742 | ADCY1     | 3.6   | 2.3   | 0.6  | 0.7 | 0.00535  |
| ENSG00000075643 | MOCOS     | 14.2  | 9.4   | 0.6  | 0.7 | 0.00065  |
| ENSG00000165124 | SVEP1     | 1.6   | 1.1   | 0.6  | 0.7 | 0.0077   |
| ENSG00000103260 | METRN     | 43.6  | 28.8  | 0.6  | 0.7 | 0.00435  |
| ENSG00000128335 | APOL2     | 14.9  | 9.9   | 0.6  | 0.7 | 0.0001   |
| ENSG00000174080 | CTSF      | 34.1  | 22.6  | 0.6  | 0.7 | 5.00E-05 |
| ENSG00000105639 | JAK3      | 0.8   | 0.5   | 0.6  | 0.7 | 0.00875  |
| ENSG00000197943 | PLCG2     | 4.9   | 3.3   | 0.6  | 0.7 | 0.00045  |
| ENSG00000196923 | PDLIM7    | 9.1   | 6.1   | 0.6  | 0.7 | 0.00275  |
| ENSG00000219507 | FTH1P8    | 56.6  | 37.6  | 0.6  | 0.7 | 0.00015  |
| ENSG00000179546 | HTR1D     | 33.2  | 22.1  | 0.6  | 0.7 | 5.00E-05 |
| ENSG00000135525 | MAP7      | 32.9  | 49.4  | -0.6 | 1.5 | 5.00E-05 |
| ENSG00000186204 | CYP4F12   | 4.4   | 6.6   | -0.6 | 1.5 | 0.00615  |
| ENSG00000173905 | GOLIM4    | 8.9   | 13.4  | -0.6 | 1.5 | 5.00E-05 |
| ENSG00000101076 | HNF4A     | 4.3   | 6.5   | -0.6 | 1.5 | 0.00065  |
| ENSG00000101811 | CSTF2     | 9.9   | 14.9  | -0.6 | 1.5 | 5.00E-05 |
| ENSG00000151491 | EPS8      | 48.0  | 72.3  | -0.6 | 1.5 | 5.00E-05 |
| ENSG00000168404 | MLKL      | 10.1  | 15.2  | -0.6 | 1.5 | 0.0001   |
| ENSG00000168497 | SDPR      | 1.5   | 2.2   | -0.6 | 1.5 | 0.00785  |
| ENSG00000211445 | GPX3      | 3.7   | 5.5   | -0.6 | 1.5 | 0.0058   |

|                 |             |      |       |      |     |          |
|-----------------|-------------|------|-------|------|-----|----------|
| ENSG00000130816 | DNMT1       | 9.3  | 14.0  | -0.6 | 1.5 | 0.0001   |
| ENSG00000130309 | COLGALT1    | 29.9 | 45.2  | -0.6 | 1.5 | 5.00E-05 |
| ENSG00000156026 | MCU         | 30.4 | 45.9  | -0.6 | 1.5 | 5.00E-05 |
| ENSG00000139190 | VAMP1       | 3.2  | 4.9   | -0.6 | 1.5 | 0.00555  |
| ENSG00000196498 | NCOR2       | 37.5 | 56.6  | -0.6 | 1.5 | 0.00025  |
| ENSG00000163362 | C1orf106    | 14.6 | 22.0  | -0.6 | 1.5 | 5.00E-05 |
| ENSG00000107960 | OBFC1       | 11.9 | 18.0  | -0.6 | 1.5 | 0.0001   |
| ENSG00000164104 | HMGB2       | 16.4 | 24.8  | -0.6 | 1.5 | 5.00E-05 |
| ENSG00000080839 | RBL1        | 2.1  | 3.2   | -0.6 | 1.5 | 0.00115  |
| ENSG00000154822 | PLCL2       | 1.9  | 2.9   | -0.6 | 1.5 | 0.00245  |
| ENSG00000164136 | IL15        | 10.8 | 16.4  | -0.6 | 1.5 | 0.00185  |
| ENSG00000186529 | CYP4F3      | 13.1 | 19.9  | -0.6 | 1.5 | 0.0001   |
| ENSG00000128567 | PODXL       | 4.9  | 7.4   | -0.6 | 1.5 | 5.00E-05 |
| ENSG00000182952 | HMGNA4      | 29.1 | 44.2  | -0.6 | 1.5 | 5.00E-05 |
| ENSG00000076604 | TRAF4       | 34.6 | 52.5  | -0.6 | 1.5 | 5.00E-05 |
| ENSG00000143466 | IKBKE       | 3.2  | 4.9   | -0.6 | 1.5 | 0.0012   |
| ENSG00000104783 | KCNN4       | 7.7  | 11.8  | -0.6 | 1.5 | 5.00E-05 |
| ENSG00000116406 | EDEM3       | 14.7 | 22.5  | -0.6 | 1.5 | 5.00E-05 |
| ENSG00000158769 | F11R        | 13.9 | 21.2  | -0.6 | 1.5 | 5.00E-05 |
| ENSG00000175793 | SFN         | 27.0 | 41.3  | -0.6 | 1.5 | 5.00E-05 |
| ENSG00000014914 | MTMR11      | 4.9  | 7.5   | -0.6 | 1.5 | 0.0033   |
| ENSG00000185900 | POMK        | 3.7  | 5.7   | -0.6 | 1.5 | 0.00175  |
| ENSG00000135476 | ESPL1       | 2.1  | 3.2   | -0.6 | 1.5 | 0.00455  |
| ENSG00000273297 | RP11-38M8.1 | 7.1  | 10.9  | -0.6 | 1.5 | 0.0065   |
| ENSG00000176485 | PLA2G16     | 72.0 | 110.7 | -0.6 | 1.5 | 5.00E-05 |
| ENSG00000154642 | C21orf91    | 1.4  | 2.2   | -0.6 | 1.5 | 0.0026   |
| ENSG00000106804 | C5          | 54.2 | 83.4  | -0.6 | 1.5 | 5.00E-05 |
| ENSG00000147027 | TMEM47      | 2.0  | 3.0   | -0.6 | 1.5 | 0.00315  |
| ENSG00000137142 | IGFBPL1     | 3.5  | 5.4   | -0.6 | 1.5 | 0.00615  |
| ENSG00000023445 | BIRC3       | 8.7  | 13.4  | -0.6 | 1.5 | 5.00E-05 |
| ENSG00000197077 | KIAA1671    | 5.3  | 8.3   | -0.6 | 1.5 | 5.00E-05 |
| ENSG00000175548 | ALG10B      | 2.5  | 3.8   | -0.6 | 1.5 | 0.00395  |
| ENSG00000076067 | RBMS2       | 9.0  | 13.9  | -0.6 | 1.5 | 5.00E-05 |
| ENSG00000138160 | KIF11       | 4.7  | 7.2   | -0.6 | 1.5 | 5.00E-05 |
| ENSG00000138182 | KIF20B      | 2.0  | 3.0   | -0.6 | 1.5 | 0.001    |
| ENSG00000185480 | PARPBP      | 4.2  | 6.4   | -0.6 | 1.5 | 0.0049   |
| ENSG00000058272 | PPP1R12A    | 13.4 | 20.7  | -0.6 | 1.5 | 0.00055  |
| ENSG00000175920 | DOK7        | 6.1  | 9.5   | -0.6 | 1.5 | 0.00295  |
| ENSG00000146670 | CDCA5       | 4.7  | 7.3   | -0.6 | 1.6 | 0.00035  |
| ENSG00000167325 | RRM1        | 13.0 | 20.3  | -0.6 | 1.6 | 5.00E-05 |
| ENSG00000123219 | CENPK       | 7.6  | 11.8  | -0.6 | 1.6 | 0.00315  |
| ENSG00000057294 | PKP2        | 2.9  | 4.5   | -0.6 | 1.6 | 0.0001   |
| ENSG00000167703 | SLC43A2     | 2.2  | 3.4   | -0.6 | 1.6 | 0.004    |
| ENSG00000163624 | CDS1        | 1.1  | 1.7   | -0.6 | 1.6 | 0.0027   |
| ENSG00000140577 | CRTC3       | 14.0 | 21.9  | -0.6 | 1.6 | 5.00E-05 |



|                 |         |        |        |      |     |          |
|-----------------|---------|--------|--------|------|-----|----------|
| ENSG00000136111 | TBC1D4  | 5.2    | 8.2    | -0.6 | 1.6 | 5.00E-05 |
| ENSG00000150687 | PRSS23  | 65.1   | 101.8  | -0.6 | 1.6 | 0.0001   |
| ENSG00000126561 | STAT5A  | 1.7    | 2.7    | -0.6 | 1.6 | 0.00135  |
| ENSG00000004700 | RECQL   | 17.1   | 26.7   | -0.6 | 1.6 | 5.00E-05 |
| ENSG00000140332 | TLE3    | 3.4    | 5.3    | -0.6 | 1.6 | 0.004    |
| ENSG00000030419 | IKZF2   | 0.3    | 0.4    | -0.6 | 1.6 | 0.00915  |
| ENSG00000132297 | HHLA1   | 1.3    | 2.0    | -0.6 | 1.6 | 0.0046   |
| ENSG00000127334 | DYRK2   | 5.8    | 9.0    | -0.6 | 1.6 | 5.00E-05 |
| ENSG00000065357 | DGKA    | 5.4    | 8.5    | -0.6 | 1.6 | 0.00045  |
| ENSG00000211459 | MT-RNR1 | 1286.2 | 2018.0 | -0.6 | 1.6 | 5.00E-05 |
| ENSG00000115616 | SLC9A2  | 3.2    | 5.0    | -0.7 | 1.6 | 5.00E-05 |
| ENSG00000108582 | CPD     | 62.6   | 98.3   | -0.7 | 1.6 | 5.00E-05 |
| ENSG00000120519 | SLC10A7 | 3.1    | 4.8    | -0.7 | 1.6 | 0.0066   |
| ENSG00000104760 | FGL1    | 55.1   | 86.6   | -0.7 | 1.6 | 5.00E-05 |
| ENSG00000110881 | ASIC1   | 1.9    | 2.9    | -0.7 | 1.6 | 0.0008   |
| ENSG00000139734 | DIAPH3  | 1.2    | 1.9    | -0.7 | 1.6 | 0.00335  |
| ENSG00000142627 | EPHA2   | 30.4   | 47.8   | -0.7 | 1.6 | 5.00E-05 |
| ENSG00000136603 | SKIL    | 11.7   | 18.5   | -0.7 | 1.6 | 0.0001   |
| ENSG00000080503 | SMARCA2 | 10.7   | 16.7   | -0.7 | 1.6 | 0.0002   |
| ENSG00000153904 | DDAH1   | 5.7    | 8.9    | -0.7 | 1.6 | 0.0006   |
| ENSG00000129317 | PUS7L   | 5.2    | 8.2    | -0.7 | 1.6 | 0.0001   |
| ENSG00000179104 | TMTC2   | 5.2    | 8.2    | -0.7 | 1.6 | 5.00E-05 |
| ENSG00000138386 | NAB1    | 9.4    | 14.9   | -0.7 | 1.6 | 5.00E-05 |
| ENSG00000046604 | DSG2    | 31.9   | 50.4   | -0.7 | 1.6 | 5.00E-05 |
| ENSG00000124766 | SOX4    | 12.9   | 20.4   | -0.7 | 1.6 | 5.00E-05 |
| ENSG00000109586 | GALNT7  | 37.5   | 59.4   | -0.7 | 1.6 | 5.00E-05 |
| ENSG00000069702 | TGFBR3  | 1.6    | 2.6    | -0.7 | 1.6 | 0.0001   |
| ENSG00000133466 | C1QTNF6 | 7.3    | 11.5   | -0.7 | 1.6 | 5.00E-05 |
| ENSG00000146247 | PHIP    | 4.2    | 6.7    | -0.7 | 1.6 | 5.00E-05 |
| ENSG00000151150 | ANK3    | 2.4    | 3.7    | -0.7 | 1.6 | 0.00305  |
| ENSG00000124429 | POF1B   | 6.8    | 10.8   | -0.7 | 1.6 | 5.00E-05 |
| ENSG00000170624 | SGCD    | 5.2    | 8.3    | -0.7 | 1.6 | 0.00355  |
| ENSG00000175274 | TP53I11 | 26.8   | 42.7   | -0.7 | 1.6 | 5.00E-05 |
| ENSG00000119938 | PPP1R3C | 9.3    | 14.8   | -0.7 | 1.6 | 5.00E-05 |
| ENSG00000148344 | PTGES   | 20.9   | 33.3   | -0.7 | 1.6 | 5.00E-05 |
| ENSG00000108639 | SYNGR2  | 125.0  | 199.5  | -0.7 | 1.6 | 5.00E-05 |
| ENSG00000184384 | MAML2   | 0.7    | 1.1    | -0.7 | 1.6 | 0.0028   |
| ENSG00000127329 | PTPRB   | 1.3    | 2.0    | -0.7 | 1.6 | 0.00035  |
| ENSG00000114812 | VIPR1   | 0.6    | 0.9    | -0.7 | 1.6 | 0.00485  |
| ENSG00000176788 | BASP1   | 122.3  | 195.7  | -0.7 | 1.6 | 5.00E-05 |
| ENSG00000145012 | LPP     | 14.5   | 23.3   | -0.7 | 1.6 | 5.00E-05 |
| ENSG00000106003 | LFNG    | 2.2    | 3.5    | -0.7 | 1.6 | 0.00385  |
| ENSG00000099860 | GADD45B | 4.2    | 6.8    | -0.7 | 1.6 | 0.0011   |
| ENSG00000171723 | GPHN    | 7.6    | 12.2   | -0.7 | 1.6 | 0.00095  |
| ENSG00000089057 | SLC23A2 | 46.4   | 74.4   | -0.7 | 1.6 | 5.00E-05 |

|                 |           |       |       |      |     |          |
|-----------------|-----------|-------|-------|------|-----|----------|
| ENSG00000129493 | HEATR5A   | 24.4  | 39.2  | -0.7 | 1.6 | 5.00E-05 |
| ENSG00000109321 | AREG      | 3.7   | 6.0   | -0.7 | 1.6 | 0.00605  |
| ENSG00000047365 | ARAP2     | 0.8   | 1.2   | -0.7 | 1.6 | 0.00735  |
| ENSG00000114805 | PLCH1     | 2.4   | 3.8   | -0.7 | 1.6 | 5.00E-05 |
| ENSG00000160191 | PDE9A     | 3.9   | 6.3   | -0.7 | 1.6 | 0.00195  |
| ENSG00000160588 | MPZL3     | 0.7   | 1.2   | -0.7 | 1.6 | 0.0073   |
| ENSG00000185950 | IRS2      | 18.2  | 29.4  | -0.7 | 1.6 | 5.00E-05 |
| ENSG00000125657 | TNFSF9    | 12.3  | 19.8  | -0.7 | 1.6 | 5.00E-05 |
| ENSG00000133424 | LARGE     | 2.4   | 3.9   | -0.7 | 1.6 | 0.0009   |
| ENSG00000133321 | RARRES3   | 6.8   | 10.9  | -0.7 | 1.6 | 0.00165  |
| ENSG00000188660 | LINC00319 | 1.2   | 2.0   | -0.7 | 1.6 | 0.00185  |
| ENSG00000148773 | MKI67     | 5.4   | 8.8   | -0.7 | 1.6 | 5.00E-05 |
| ENSG00000111816 | FRK       | 4.7   | 7.6   | -0.7 | 1.6 | 5.00E-05 |
| ENSG00000144891 | AGTR1     | 2.9   | 4.7   | -0.7 | 1.6 | 0.0019   |
| ENSG00000120211 | INSL4     | 14.6  | 23.8  | -0.7 | 1.6 | 5.00E-05 |
| ENSG00000196639 | HRH1      | 1.4   | 2.3   | -0.7 | 1.6 | 0.00135  |
| ENSG00000151746 | BICD1     | 7.0   | 11.4  | -0.7 | 1.6 | 0.00115  |
| ENSG00000110841 | PPFIBP1   | 12.6  | 20.5  | -0.7 | 1.6 | 5.00E-05 |
| ENSG00000166147 | FBN1      | 3.3   | 5.3   | -0.7 | 1.6 | 0.0001   |
| ENSG00000269028 | MTRNR2L12 | 10.4  | 17.0  | -0.7 | 1.6 | 0.0003   |
| ENSG00000166165 | CKB       | 17.3  | 28.2  | -0.7 | 1.6 | 0.00065  |
| ENSG00000088325 | TPX2      | 10.1  | 16.4  | -0.7 | 1.6 | 5.00E-05 |
| ENSG00000159184 | HOXB13    | 1.7   | 2.8   | -0.7 | 1.6 | 0.0004   |
| ENSG00000123416 | TUBA1B    | 116.6 | 189.9 | -0.7 | 1.6 | 5.00E-05 |
| ENSG00000163558 | PRKCI     | 12.7  | 20.7  | -0.7 | 1.6 | 5.00E-05 |
| ENSG00000163507 | KIAA1524  | 3.2   | 5.3   | -0.7 | 1.6 | 0.0004   |
| ENSG00000136824 | SMC2      | 4.1   | 6.8   | -0.7 | 1.6 | 5.00E-05 |
| ENSG00000143344 | RGL1      | 4.1   | 6.8   | -0.7 | 1.6 | 5.00E-05 |
| ENSG00000139318 | DUSP6     | 12.7  | 20.8  | -0.7 | 1.6 | 5.00E-05 |
| ENSG00000110723 | EXPH5     | 0.5   | 0.8   | -0.7 | 1.6 | 0.00075  |
| ENSG00000168079 | SCARA5    | 5.7   | 9.3   | -0.7 | 1.6 | 5.00E-05 |
| ENSG00000134755 | DSC2      | 1.2   | 1.9   | -0.7 | 1.6 | 0.00105  |
| ENSG00000088367 | EPB41L1   | 27.9  | 45.8  | -0.7 | 1.6 | 0.0026   |
| ENSG00000130818 | ZNF426    | 0.8   | 1.3   | -0.7 | 1.6 | 0.00835  |
| ENSG00000005108 | THSD7A    | 6.8   | 11.2  | -0.7 | 1.6 | 5.00E-05 |
| ENSG00000197119 | SLC25A29  | 23.1  | 37.9  | -0.7 | 1.6 | 0.0016   |
| ENSG00000139132 | FGD4      | 2.2   | 3.6   | -0.7 | 1.6 | 0.0001   |
| ENSG00000148498 | PARD3     | 29.9  | 49.0  | -0.7 | 1.6 | 5.00E-05 |
| ENSG00000176532 | PRR15     | 20.6  | 33.8  | -0.7 | 1.6 | 5.00E-05 |
| ENSG00000118777 | ABCG2     | 8.6   | 14.1  | -0.7 | 1.6 | 0.0002   |
| ENSG00000177409 | SAMD9L    | 0.3   | 0.5   | -0.7 | 1.6 | 0.0078   |
| ENSG00000143036 | SLC44A3   | 1.7   | 2.8   | -0.7 | 1.6 | 0.00545  |
| ENSG00000109339 | MAPK10    | 0.6   | 1.0   | -0.7 | 1.6 | 0.00355  |
| ENSG00000142207 | URB1      | 4.7   | 7.8   | -0.7 | 1.6 | 5.00E-05 |
| ENSG00000184205 | TSPYL2    | 8.7   | 14.3  | -0.7 | 1.6 | 5.00E-05 |

|                 |           |       |       |      |     |          |
|-----------------|-----------|-------|-------|------|-----|----------|
| ENSG00000100558 | PLEK2     | 2.1   | 3.5   | -0.7 | 1.6 | 0.0062   |
| ENSG00000175130 | MARCKSL1  | 33.7  | 55.5  | -0.7 | 1.6 | 5.00E-05 |
| ENSG00000132646 | PCNA      | 67.2  | 110.8 | -0.7 | 1.6 | 5.00E-05 |
| ENSG00000139083 | ETV6      | 4.2   | 6.9   | -0.7 | 1.6 | 5.00E-05 |
| ENSG00000149636 | DSN1      | 4.5   | 7.4   | -0.7 | 1.7 | 0.0004   |
| ENSG00000266714 | MYO15B    | 81.7  | 135.0 | -0.7 | 1.7 | 0.0048   |
| ENSG00000198682 | PAPSS2    | 40.3  | 66.6  | -0.7 | 1.7 | 5.00E-05 |
| ENSG00000105738 | SIPA1L3   | 19.6  | 32.4  | -0.7 | 1.7 | 5.00E-05 |
| ENSG00000042317 | SPATA7    | 8.4   | 14.0  | -0.7 | 1.7 | 0.0023   |
| ENSG00000102218 | RP2       | 6.6   | 10.9  | -0.7 | 1.7 | 5.00E-05 |
| ENSG00000213145 | CRIP1     | 111.2 | 184.5 | -0.7 | 1.7 | 5.00E-05 |
| ENSG00000159640 | ACE       | 0.2   | 0.3   | -0.7 | 1.7 | 0.00795  |
| ENSG00000006611 | USH1C     | 1.4   | 2.3   | -0.7 | 1.7 | 0.00585  |
| ENSG00000065809 | FAM107B   | 74.1  | 123.2 | -0.7 | 1.7 | 5.00E-05 |
| ENSG00000153113 | CAST      | 83.2  | 138.5 | -0.7 | 1.7 | 5.00E-05 |
| ENSG00000138061 | CYP1B1    | 16.1  | 26.8  | -0.7 | 1.7 | 5.00E-05 |
| ENSG00000162545 | CAMK2N1   | 28.5  | 47.5  | -0.7 | 1.7 | 5.00E-05 |
| ENSG00000171241 | SHCBP1    | 6.2   | 10.3  | -0.7 | 1.7 | 5.00E-05 |
| ENSG00000224081 | LINC01057 | 2.7   | 4.5   | -0.7 | 1.7 | 0.00055  |
| ENSG00000106258 | CYP3A5    | 3.0   | 5.0   | -0.7 | 1.7 | 0.0023   |
| ENSG00000139323 | POC1B     | 11.3  | 18.8  | -0.7 | 1.7 | 0.00015  |
| ENSG00000181744 | C3orf58   | 8.2   | 13.7  | -0.7 | 1.7 | 5.00E-05 |
| ENSG00000188641 | DPYD      | 3.1   | 5.2   | -0.7 | 1.7 | 0.0004   |
| ENSG00000197747 | S100A10   | 221.0 | 370.1 | -0.7 | 1.7 | 5.00E-05 |
| ENSG00000176697 | BDNF      | 4.7   | 7.9   | -0.7 | 1.7 | 5.00E-05 |
| ENSG00000197892 | KIF13B    | 6.0   | 10.0  | -0.7 | 1.7 | 5.00E-05 |
| ENSG00000101333 | PLCB4     | 5.3   | 8.9   | -0.7 | 1.7 | 0.0001   |
| ENSG00000081026 | MAGI3     | 2.8   | 4.7   | -0.8 | 1.7 | 5.00E-05 |
| ENSG00000211455 | STK38L    | 7.2   | 12.2  | -0.8 | 1.7 | 5.00E-05 |
| ENSG00000111490 | TBC1D30   | 1.9   | 3.1   | -0.8 | 1.7 | 0.0013   |
| ENSG00000139116 | KIF21A    | 18.3  | 30.8  | -0.8 | 1.7 | 5.00E-05 |
| ENSG00000141449 | GREB1L    | 0.4   | 0.6   | -0.8 | 1.7 | 0.00905  |
| ENSG00000176208 | ATAD5     | 0.7   | 1.2   | -0.8 | 1.7 | 0.001    |
| ENSG00000113368 | LMNB1     | 5.5   | 9.3   | -0.8 | 1.7 | 0.0002   |
| ENSG00000247844 | CCAT1     | 6.4   | 10.8  | -0.8 | 1.7 | 5.00E-05 |
| ENSG00000135750 | KCNK1     | 17.0  | 28.8  | -0.8 | 1.7 | 5.00E-05 |
| ENSG00000151229 | SLC2A13   | 6.9   | 11.8  | -0.8 | 1.7 | 5.00E-05 |
| ENSG00000120802 | TMPO      | 22.8  | 38.7  | -0.8 | 1.7 | 5.00E-05 |
| ENSG00000198554 | WDHD1     | 2.3   | 3.9   | -0.8 | 1.7 | 5.00E-05 |
| ENSG00000255414 | LINC01059 | 1.2   | 2.0   | -0.8 | 1.7 | 0.0039   |
| ENSG00000171631 | P2RY6     | 4.5   | 7.6   | -0.8 | 1.7 | 0.00095  |
| ENSG00000158470 | B4GALT5   | 21.4  | 36.4  | -0.8 | 1.7 | 5.00E-05 |
| ENSG00000177084 | POLE      | 4.4   | 7.5   | -0.8 | 1.7 | 5.00E-05 |
| ENSG00000188643 | S100A16   | 105.4 | 179.4 | -0.8 | 1.7 | 5.00E-05 |
| ENSG00000180535 | BHLHA15   | 3.9   | 6.6   | -0.8 | 1.7 | 0.00315  |

|                 |               |       |       |      |     |          |
|-----------------|---------------|-------|-------|------|-----|----------|
| ENSG00000092470 | WDR76         | 1.3   | 2.2   | -0.8 | 1.7 | 0.00315  |
| ENSG00000107821 | KAZALD1       | 4.8   | 8.1   | -0.8 | 1.7 | 0.0008   |
| ENSG00000114790 | ARHGEF26      | 1.5   | 2.5   | -0.8 | 1.7 | 0.00125  |
| ENSG00000257027 | RP11-705C15.3 | 1.4   | 2.3   | -0.8 | 1.7 | 0.00175  |
| ENSG00000139725 | RHOF          | 26.6  | 45.5  | -0.8 | 1.7 | 5.00E-05 |
| ENSG00000170004 | CHD3          | 31.8  | 54.3  | -0.8 | 1.7 | 5.00E-05 |
| ENSG00000118640 | VAMP8         | 14.8  | 25.3  | -0.8 | 1.7 | 5.00E-05 |
| ENSG00000122966 | CIT           | 2.3   | 4.0   | -0.8 | 1.7 | 0.00175  |
| ENSG00000214391 | RP11-121L10.3 | 2.2   | 3.7   | -0.8 | 1.7 | 0.0008   |
| ENSG00000171951 | SCG2          | 2.1   | 3.6   | -0.8 | 1.7 | 0.00085  |
| ENSG00000108691 | CCL2          | 3.8   | 6.5   | -0.8 | 1.7 | 0.00265  |
| ENSG00000136044 | APPL2         | 20.3  | 34.8  | -0.8 | 1.7 | 5.00E-05 |
| ENSG00000182168 | UNC5C         | 0.2   | 0.4   | -0.8 | 1.7 | 0.00135  |
| ENSG00000197933 | ZNF823        | 0.6   | 1.0   | -0.8 | 1.7 | 0.0032   |
| ENSG00000138696 | BMPR1B        | 7.9   | 13.6  | -0.8 | 1.7 | 5.00E-05 |
| ENSG00000123473 | STIL          | 2.0   | 3.4   | -0.8 | 1.7 | 0.00025  |
| ENSG00000155130 | MARCKS        | 33.8  | 58.2  | -0.8 | 1.7 | 5.00E-05 |
| ENSG00000135318 | NT5E          | 23.4  | 40.4  | -0.8 | 1.7 | 5.00E-05 |
| ENSG00000187546 | AGMO          | 0.8   | 1.4   | -0.8 | 1.7 | 0.00565  |
| ENSG00000153956 | CACNA2D1      | 6.3   | 10.9  | -0.8 | 1.7 | 5.00E-05 |
| ENSG00000144645 | OSBPL10       | 12.6  | 21.8  | -0.8 | 1.7 | 0.0003   |
| ENSG00000178162 | AC140481.1    | 0.7   | 1.3   | -0.8 | 1.7 | 0.00275  |
| ENSG00000173237 | C11orf86      | 1.5   | 2.5   | -0.8 | 1.7 | 0.00685  |
| ENSG00000170647 | TMEM133       | 3.9   | 6.8   | -0.8 | 1.7 | 0.0005   |
| ENSG00000125885 | MCM8          | 5.4   | 9.4   | -0.8 | 1.7 | 5.00E-05 |
| ENSG00000118515 | SGK1          | 3.8   | 6.6   | -0.8 | 1.7 | 5.00E-05 |
| ENSG00000112837 | TBX18         | 15.2  | 26.4  | -0.8 | 1.7 | 5.00E-05 |
| ENSG00000235162 | C12orf75      | 112.6 | 196.0 | -0.8 | 1.7 | 5.00E-05 |
| ENSG00000132470 | ITGB4         | 38.4  | 67.0  | -0.8 | 1.7 | 0.0001   |
| ENSG00000132437 | DDC           | 3.6   | 6.3   | -0.8 | 1.7 | 5.00E-05 |
| ENSG00000267056 | AC005336.4    | 9.2   | 16.0  | -0.8 | 1.7 | 5.00E-05 |
| ENSG00000104738 | MCM4          | 7.3   | 12.7  | -0.8 | 1.7 | 5.00E-05 |
| ENSG00000197329 | PELI1         | 2.3   | 4.0   | -0.8 | 1.8 | 5.00E-05 |
| ENSG00000184445 | KNTC1         | 4.4   | 7.7   | -0.8 | 1.8 | 0.00035  |
| ENSG00000164683 | HEY1          | 1.3   | 2.2   | -0.8 | 1.8 | 0.0014   |
| ENSG00000071073 | MGAT4A        | 1.1   | 1.9   | -0.8 | 1.8 | 0.0019   |
| ENSG00000112699 | GMDS          | 23.2  | 40.8  | -0.8 | 1.8 | 5.00E-05 |
| ENSG00000100297 | MCM5          | 3.3   | 5.9   | -0.8 | 1.8 | 0.00035  |
| ENSG00000250221 | KRT8P32       | 0.6   | 1.1   | -0.8 | 1.8 | 0.0054   |
| ENSG00000168453 | HR            | 5.4   | 9.5   | -0.8 | 1.8 | 5.00E-05 |
| ENSG00000166426 | CRABP1        | 5.8   | 10.4  | -0.8 | 1.8 | 0.0002   |
| ENSG00000182809 | CRIP2         | 4.2   | 7.4   | -0.8 | 1.8 | 0.0008   |
| ENSG00000109881 | CCDC34        | 8.7   | 15.5  | -0.8 | 1.8 | 5.00E-05 |
| ENSG00000021300 | PLEKHB1       | 0.6   | 1.0   | -0.8 | 1.8 | 0.0002   |
| ENSG00000105825 | TFPI2         | 37.8  | 67.2  | -0.8 | 1.8 | 5.00E-05 |

|                 |               |       |       |      |     |          |
|-----------------|---------------|-------|-------|------|-----|----------|
| ENSG00000272761 | RP11-572C15.6 | 0.3   | 0.5   | -0.8 | 1.8 | 0.0051   |
| ENSG00000166532 | RIMKLB        | 41.5  | 73.8  | -0.8 | 1.8 | 5.00E-05 |
| ENSG00000123094 | RASSF8        | 2.9   | 5.2   | -0.8 | 1.8 | 5.00E-05 |
| ENSG00000187193 | MT1X          | 51.8  | 92.3  | -0.8 | 1.8 | 5.00E-05 |
| ENSG00000198018 | ENTPD7        | 4.5   | 8.0   | -0.8 | 1.8 | 0.00685  |
| ENSG00000150630 | VEGFC         | 3.8   | 6.8   | -0.8 | 1.8 | 5.00E-05 |
| ENSG00000155465 | SLC7A7        | 57.0  | 101.9 | -0.8 | 1.8 | 5.00E-05 |
| ENSG00000256579 | AC135776.1    | 6.6   | 11.7  | -0.8 | 1.8 | 0.00635  |
| ENSG00000186193 | SAPCD2        | 2.2   | 4.0   | -0.8 | 1.8 | 5.00E-05 |
| ENSG00000156869 | FRRS1         | 1.8   | 3.3   | -0.8 | 1.8 | 0.0069   |
| ENSG00000128833 | MYO5C         | 8.2   | 14.8  | -0.8 | 1.8 | 5.00E-05 |
| ENSG00000158555 | GDPD5         | 2.0   | 3.5   | -0.8 | 1.8 | 0.00025  |
| ENSG00000119969 | HELLS         | 4.0   | 7.3   | -0.8 | 1.8 | 5.00E-05 |
| ENSG00000214114 | MYCBP         | 4.5   | 8.1   | -0.8 | 1.8 | 0.003    |
| ENSG00000170456 | DENND5B       | 7.1   | 12.9  | -0.9 | 1.8 | 5.00E-05 |
| ENSG00000118418 | HMG3          | 16.6  | 30.0  | -0.9 | 1.8 | 5.00E-05 |
| ENSG00000101003 | GINS1         | 4.7   | 8.4   | -0.9 | 1.8 | 5.00E-05 |
| ENSG00000196154 | S100A4        | 456.6 | 829.1 | -0.9 | 1.8 | 5.00E-05 |
| ENSG00000165895 | ARHGAP42      | 6.3   | 11.4  | -0.9 | 1.8 | 5.00E-05 |
| ENSG00000184992 | BRI3BP        | 7.8   | 14.2  | -0.9 | 1.8 | 5.00E-05 |
| ENSG00000076003 | MCM6          | 3.1   | 5.6   | -0.9 | 1.8 | 5.00E-05 |
| ENSG00000116962 | NID1          | 0.4   | 0.6   | -0.9 | 1.8 | 0.00285  |
| ENSG00000198650 | TAT           | 0.3   | 0.5   | -0.9 | 1.8 | 0.0026   |
| ENSG00000153246 | PLA2R1        | 0.6   | 1.2   | -0.9 | 1.8 | 0.00035  |
| ENSG00000184564 | SLITRK6       | 8.5   | 15.6  | -0.9 | 1.8 | 5.00E-05 |
| ENSG00000091428 | RAPGEF4       | 0.4   | 0.7   | -0.9 | 1.8 | 0.00495  |
| ENSG00000166741 | NNMT          | 75.6  | 138.4 | -0.9 | 1.8 | 5.00E-05 |
| ENSG00000156802 | ATAD2         | 2.9   | 5.3   | -0.9 | 1.8 | 5.00E-05 |
| ENSG00000157890 | MEGF11        | 0.3   | 0.6   | -0.9 | 1.8 | 0.00645  |
| ENSG00000214381 | LINC00488     | 0.5   | 0.9   | -0.9 | 1.8 | 0.0023   |
| ENSG00000184226 | PCDH9         | 4.5   | 8.2   | -0.9 | 1.8 | 5.00E-05 |
| ENSG00000135063 | FAM189A2      | 1.1   | 2.1   | -0.9 | 1.8 | 0.0009   |
| ENSG00000176907 | C8orf4        | 48.6  | 89.2  | -0.9 | 1.8 | 5.00E-05 |
| ENSG00000187244 | BCAM          | 7.3   | 13.4  | -0.9 | 1.8 | 5.00E-05 |
| ENSG00000198223 | CSF2RA        | 11.6  | 21.4  | -0.9 | 1.8 | 5.00E-05 |
| ENSG00000143631 | FLG           | 0.2   | 0.3   | -0.9 | 1.8 | 0.0034   |
| ENSG00000189143 | CLDN4         | 1.9   | 3.4   | -0.9 | 1.8 | 0.00025  |
| ENSG00000052126 | PLEKHA5       | 6.0   | 11.1  | -0.9 | 1.8 | 5.00E-05 |
| ENSG00000113319 | RASGRF2       | 2.5   | 4.6   | -0.9 | 1.9 | 0.0005   |
| ENSG00000119508 | NR4A3         | 1.2   | 2.3   | -0.9 | 1.9 | 0.0001   |
| ENSG00000183580 | FBXL7         | 0.4   | 0.7   | -0.9 | 1.9 | 0.0018   |
| ENSG00000126217 | MCF2L         | 0.9   | 1.8   | -0.9 | 1.9 | 5.00E-05 |
| ENSG00000224520 | KRT8P45       | 2.8   | 5.2   | -0.9 | 1.9 | 5.00E-05 |
| ENSG00000179403 | VWA1          | 5.0   | 9.3   | -0.9 | 1.9 | 5.00E-05 |
| ENSG00000163611 | SPICE1        | 3.2   | 5.9   | -0.9 | 1.9 | 5.00E-05 |

|                 |              |       |       |      |     |          |
|-----------------|--------------|-------|-------|------|-----|----------|
| ENSG00000128655 | PDE11A       | 0.2   | 0.4   | -0.9 | 1.9 | 0.00185  |
| ENSG00000122952 | ZWINT        | 6.9   | 12.9  | -0.9 | 1.9 | 5.00E-05 |
| ENSG00000123684 | LPGAT1       | 35.7  | 66.6  | -0.9 | 1.9 | 5.00E-05 |
| ENSG00000041353 | RAB27B       | 22.0  | 41.1  | -0.9 | 1.9 | 5.00E-05 |
| ENSG00000237682 | RP3-514P16.1 | 0.2   | 0.4   | -0.9 | 1.9 | 0.0089   |
| ENSG00000206530 | WDR52        | 2.5   | 4.7   | -0.9 | 1.9 | 0.00025  |
| ENSG00000134830 | C5AR2        | 0.3   | 0.5   | -0.9 | 1.9 | 0.0025   |
| ENSG00000161955 | TNFSF13      | 2.9   | 5.4   | -0.9 | 1.9 | 0.00265  |
| ENSG00000155158 | TTC39B       | 3.5   | 6.7   | -0.9 | 1.9 | 5.00E-05 |
| ENSG00000188906 | LRRK2        | 3.9   | 7.3   | -0.9 | 1.9 | 5.00E-05 |
| ENSG00000170312 | CDK1         | 12.3  | 23.1  | -0.9 | 1.9 | 5.00E-05 |
| ENSG00000112419 | PHACTR2      | 2.3   | 4.4   | -0.9 | 1.9 | 0.0001   |
| ENSG00000164045 | CDC25A       | 0.7   | 1.3   | -0.9 | 1.9 | 0.00035  |
| ENSG00000125398 | SOX9         | 4.6   | 8.7   | -0.9 | 1.9 | 5.00E-05 |
| ENSG00000162174 | ASRGL1       | 3.0   | 5.6   | -0.9 | 1.9 | 0.0042   |
| ENSG00000115590 | IL1R2        | 1.2   | 2.2   | -0.9 | 1.9 | 0.0012   |
| ENSG00000123080 | CDKN2C       | 4.9   | 9.4   | -0.9 | 1.9 | 5.00E-05 |
| ENSG00000157064 | NMNAT2       | 2.6   | 4.9   | -0.9 | 1.9 | 5.00E-05 |
| ENSG00000106686 | SPATA6L      | 2.7   | 5.1   | -0.9 | 1.9 | 0.004    |
| ENSG00000249119 | MTND6P4      | 97.0  | 184.3 | -0.9 | 1.9 | 0.0045   |
| ENSG00000114541 | FRMD4B       | 1.5   | 2.9   | -0.9 | 1.9 | 5.00E-05 |
| ENSG00000102934 | PLLP         | 1.6   | 3.1   | -0.9 | 1.9 | 0.00025  |
| ENSG00000157557 | ETS2         | 13.0  | 24.8  | -0.9 | 1.9 | 5.00E-05 |
| ENSG00000178445 | GLDC         | 2.2   | 4.1   | -0.9 | 1.9 | 5.00E-05 |
| ENSG00000108821 | COL1A1       | 0.9   | 1.8   | -0.9 | 1.9 | 0.0031   |
| ENSG00000081913 | PHLPP1       | 1.3   | 2.5   | -0.9 | 1.9 | 5.00E-05 |
| ENSG00000125462 | C1orf61      | 1.3   | 2.5   | -0.9 | 1.9 | 0.0001   |
| ENSG00000121690 | DEPDC7       | 1.2   | 2.3   | -0.9 | 1.9 | 0.0006   |
| ENSG00000137486 | ARRB1        | 4.6   | 8.8   | -0.9 | 1.9 | 5.00E-05 |
| ENSG00000167900 | TK1          | 10.5  | 20.0  | -0.9 | 1.9 | 5.00E-05 |
| ENSG00000138347 | MYPN         | 0.5   | 0.9   | -0.9 | 1.9 | 0.0021   |
| ENSG00000106789 | CORO2A       | 2.1   | 4.1   | -0.9 | 1.9 | 5.00E-05 |
| ENSG00000059804 | SLC2A3       | 30.3  | 58.6  | -1.0 | 1.9 | 5.00E-05 |
| ENSG00000169435 | RASSF6       | 3.5   | 6.8   | -1.0 | 1.9 | 5.00E-05 |
| ENSG00000167711 | SERPINF2     | 0.9   | 1.7   | -1.0 | 1.9 | 0.0001   |
| ENSG00000085840 | ORC1         | 0.6   | 1.2   | -1.0 | 1.9 | 0.00035  |
| ENSG00000120756 | PLS1         | 25.3  | 49.2  | -1.0 | 1.9 | 5.00E-05 |
| ENSG00000172296 | SPTLC3       | 2.0   | 3.9   | -1.0 | 1.9 | 0.0094   |
| ENSG00000094755 | GABRP        | 2.2   | 4.2   | -1.0 | 1.9 | 0.00715  |
| ENSG00000117461 | PIK3R3       | 0.8   | 1.5   | -1.0 | 1.9 | 0.00075  |
| ENSG00000125726 | CD70         | 21.7  | 42.2  | -1.0 | 1.9 | 5.00E-05 |
| ENSG00000023171 | GRAMD1B      | 15.8  | 30.8  | -1.0 | 1.9 | 5.00E-05 |
| ENSG00000075240 | GRAMD4       | 6.3   | 12.2  | -1.0 | 2.0 | 5.00E-05 |
| ENSG00000165272 | AQP3         | 10.7  | 20.9  | -1.0 | 2.0 | 5.00E-05 |
| ENSG00000163735 | CXCL5        | 359.6 | 705.5 | -1.0 | 2.0 | 5.00E-05 |

|                 |               |      |      |      |     |          |
|-----------------|---------------|------|------|------|-----|----------|
| ENSG00000111665 | CDCA3         | 4.4  | 8.7  | -1.0 | 2.0 | 0.0009   |
| ENSG00000170439 | METTL7B       | 4.3  | 8.4  | -1.0 | 2.0 | 0.00545  |
| ENSG00000171766 | GATM          | 4.8  | 9.4  | -1.0 | 2.0 | 5.00E-05 |
| ENSG00000214012 | KRT18P38      | 1.9  | 3.8  | -1.0 | 2.0 | 0.0001   |
| ENSG00000128917 | DLL4          | 0.3  | 0.6  | -1.0 | 2.0 | 0.0012   |
| ENSG00000258474 | RP11-187E13.1 | 2.0  | 4.0  | -1.0 | 2.0 | 0.0019   |
| ENSG00000267573 | KRT8P5        | 1.4  | 2.8  | -1.0 | 2.0 | 5.00E-05 |
| ENSG00000167772 | ANGPTL4       | 9.8  | 19.4 | -1.0 | 2.0 | 0.0066   |
| ENSG00000012171 | SEMA3B        | 12.6 | 25.0 | -1.0 | 2.0 | 5.00E-05 |
| ENSG00000137310 | TCF19         | 1.0  | 1.9  | -1.0 | 2.0 | 0.00445  |
| ENSG00000196878 | LAMB3         | 9.6  | 19.1 | -1.0 | 2.0 | 5.00E-05 |
| ENSG00000141429 | GALNT1        | 40.0 | 79.6 | -1.0 | 2.0 | 5.00E-05 |
| ENSG00000138771 | SHROOM3       | 2.1  | 4.1  | -1.0 | 2.0 | 5.00E-05 |
| ENSG00000112576 | CCND3         | 40.5 | 80.6 | -1.0 | 2.0 | 5.00E-05 |
| ENSG00000006283 | CACNA1G       | 0.8  | 1.5  | -1.0 | 2.0 | 5.00E-05 |
| ENSG00000174371 | EXO1          | 1.8  | 3.6  | -1.0 | 2.0 | 0.0006   |
| ENSG00000260963 | RP11-297L17.2 | 1.9  | 3.7  | -1.0 | 2.0 | 0.0051   |
| ENSG00000164265 | SCGB3A2       | 1.6  | 3.1  | -1.0 | 2.0 | 0.00585  |
| ENSG00000121858 | TNFSF10       | 0.6  | 1.2  | -1.0 | 2.0 | 0.0053   |
| ENSG00000104267 | CA2           | 6.3  | 12.6 | -1.0 | 2.0 | 5.00E-05 |
| ENSG00000162552 | WNT4          | 1.2  | 2.4  | -1.0 | 2.0 | 0.0029   |
| ENSG00000117143 | UAP1          | 17.0 | 33.9 | -1.0 | 2.0 | 5.00E-05 |
| ENSG00000132031 | MATN3         | 3.0  | 6.0  | -1.0 | 2.0 | 5.00E-05 |
| ENSG00000250910 | AC097467.2    | 0.2  | 0.4  | -1.0 | 2.0 | 0.0002   |
| ENSG00000233461 | RP11-295G20.2 | 18.7 | 37.5 | -1.0 | 2.0 | 5.00E-05 |
| ENSG00000100479 | POLE2         | 1.4  | 2.8  | -1.0 | 2.0 | 0.0011   |
| ENSG00000170786 | SDR16C5       | 1.6  | 3.3  | -1.0 | 2.0 | 0.00015  |
| ENSG00000126947 | ARMCX1        | 0.5  | 1.1  | -1.0 | 2.0 | 0.00825  |
| ENSG00000137642 | SORL1         | 2.6  | 5.2  | -1.0 | 2.0 | 5.00E-05 |
| ENSG00000125730 | C3            | 29.0 | 58.6 | -1.0 | 2.0 | 5.00E-05 |
| ENSG00000181449 | SOX2          | 4.1  | 8.2  | -1.0 | 2.0 | 0.0009   |
| ENSG00000213943 | KRT18P17      | 0.5  | 1.0  | -1.0 | 2.0 | 0.0014   |
| ENSG00000167157 | PRRX2         | 0.4  | 0.9  | -1.0 | 2.0 | 0.0056   |
| ENSG00000185186 | LINC00313     | 5.4  | 10.9 | -1.0 | 2.0 | 0.0006   |
| ENSG00000181690 | PLAG1         | 0.2  | 0.4  | -1.0 | 2.0 | 0.0013   |
| ENSG00000123843 | C4BPB         | 0.3  | 0.6  | -1.0 | 2.0 | 0.0049   |
| ENSG00000134369 | NAV1          | 2.5  | 5.1  | -1.0 | 2.0 | 0.0021   |
| ENSG00000114698 | PLSCR4        | 6.7  | 13.7 | -1.0 | 2.0 | 5.00E-05 |
| ENSG00000164078 | MST1R         | 4.6  | 9.4  | -1.0 | 2.0 | 5.00E-05 |
| ENSG00000120054 | CPN1          | 0.4  | 0.7  | -1.0 | 2.0 | 0.00075  |
| ENSG00000178999 | AURKB         | 6.6  | 13.4 | -1.0 | 2.1 | 5.00E-05 |
| ENSG00000143476 | DTL           | 1.3  | 2.7  | -1.0 | 2.1 | 0.0001   |
| ENSG00000050405 | LIMA1         | 1.2  | 2.5  | -1.0 | 2.1 | 5.00E-05 |
| ENSG00000173227 | SYT12         | 0.4  | 0.9  | -1.0 | 2.1 | 5.00E-05 |
| ENSG00000164684 | ZNF704        | 2.4  | 4.9  | -1.0 | 2.1 | 0.0014   |

|                 |               |       |       |      |     |          |
|-----------------|---------------|-------|-------|------|-----|----------|
| ENSG00000011422 | PLAUR         | 19.5  | 40.2  | -1.0 | 2.1 | 5.00E-05 |
| ENSG00000260461 | RP11-541N10.3 | 0.7   | 1.4   | -1.0 | 2.1 | 5.00E-05 |
| ENSG00000135378 | PRRG4         | 0.2   | 0.5   | -1.0 | 2.1 | 0.00045  |
| ENSG00000165891 | E2F7          | 0.7   | 1.5   | -1.0 | 2.1 | 5.00E-05 |
| ENSG00000214207 | KRT18P10      | 1.3   | 2.7   | -1.0 | 2.1 | 0.0015   |
| ENSG00000136492 | BRIP1         | 0.8   | 1.6   | -1.0 | 2.1 | 0.00035  |
| ENSG00000231131 | RP11-346D6.6  | 1.1   | 2.3   | -1.0 | 2.1 | 0.0004   |
| ENSG00000165474 | GJB2          | 0.4   | 0.9   | -1.0 | 2.1 | 0.00295  |
| ENSG00000111261 | MANSC1        | 8.1   | 16.8  | -1.0 | 2.1 | 5.00E-05 |
| ENSG00000114374 | USP9Y         | 2.9   | 6.0   | -1.1 | 2.1 | 0.0015   |
| ENSG00000112541 | PDE10A        | 4.3   | 9.0   | -1.1 | 2.1 | 0.00035  |
| ENSG00000117115 | PADI2         | 0.2   | 0.5   | -1.1 | 2.1 | 0.00055  |
| ENSG00000103089 | FA2H          | 29.2  | 61.1  | -1.1 | 2.1 | 5.00E-05 |
| ENSG00000135766 | EGLN1         | 28.1  | 59.1  | -1.1 | 2.1 | 5.00E-05 |
| ENSG00000143416 | SELENBP1      | 12.8  | 26.9  | -1.1 | 2.1 | 5.00E-05 |
| ENSG00000270145 | CTD-2267D19.6 | 0.5   | 1.1   | -1.1 | 2.1 | 0.0029   |
| ENSG00000236824 | BCYRN1        | 0.9   | 2.0   | -1.1 | 2.1 | 5.00E-05 |
| ENSG00000116785 | CFHR3         | 1.7   | 3.7   | -1.1 | 2.1 | 0.0002   |
| ENSG00000257594 | GALNT4        | 5.4   | 11.5  | -1.1 | 2.1 | 5.00E-05 |
| ENSG00000065361 | ERBB3         | 2.5   | 5.3   | -1.1 | 2.1 | 0.0081   |
| ENSG00000124107 | SLPI          | 77.3  | 164.2 | -1.1 | 2.1 | 5.00E-05 |
| ENSG00000167232 | ZNF91         | 0.2   | 0.4   | -1.1 | 2.1 | 0.0017   |
| ENSG00000103460 | TOX3          | 5.7   | 12.1  | -1.1 | 2.1 | 5.00E-05 |
| ENSG00000164176 | EDIL3         | 0.5   | 1.1   | -1.1 | 2.1 | 0.0032   |
| ENSG00000111331 | OAS3          | 4.5   | 9.6   | -1.1 | 2.1 | 5.00E-05 |
| ENSG00000152217 | SETBP1        | 1.2   | 2.6   | -1.1 | 2.1 | 5.00E-05 |
| ENSG00000171303 | KCNK3         | 0.5   | 1.0   | -1.1 | 2.1 | 5.00E-05 |
| ENSG00000185101 | ANO9          | 0.5   | 1.0   | -1.1 | 2.1 | 0.0023   |
| ENSG00000135362 | PRR5L         | 1.1   | 2.3   | -1.1 | 2.1 | 5.00E-05 |
| ENSG00000018236 | CNTN1         | 110.0 | 235.8 | -1.1 | 2.1 | 5.00E-05 |
| ENSG00000203635 | AC144450.2    | 0.2   | 0.3   | -1.1 | 2.1 | 0.0044   |
| ENSG00000144063 | MALL          | 22.6  | 48.4  | -1.1 | 2.1 | 5.00E-05 |
| ENSG00000132326 | PER2          | 5.7   | 12.2  | -1.1 | 2.1 | 5.00E-05 |
| ENSG00000233493 | TMEM238       | 3.4   | 7.2   | -1.1 | 2.1 | 5.00E-05 |
| ENSG00000196353 | CPNE4         | 1.9   | 4.0   | -1.1 | 2.2 | 5.00E-05 |
| ENSG00000178726 | THBD          | 7.4   | 15.9  | -1.1 | 2.2 | 5.00E-05 |
| ENSG00000106537 | TSPAN13       | 30.7  | 66.3  | -1.1 | 2.2 | 5.00E-05 |
| ENSG00000106546 | AHR           | 18.6  | 40.1  | -1.1 | 2.2 | 5.00E-05 |
| ENSG00000093009 | CDC45         | 1.8   | 3.9   | -1.1 | 2.2 | 0.00125  |
| ENSG00000198879 | SFMBT2        | 1.3   | 2.8   | -1.1 | 2.2 | 5.00E-05 |
| ENSG00000225485 | ARHGAP23      | 3.8   | 8.2   | -1.1 | 2.2 | 5.00E-05 |
| ENSG00000159713 | TPPP3         | 1.0   | 2.2   | -1.1 | 2.2 | 0.0003   |
| ENSG00000111247 | RAD51AP1      | 3.6   | 7.8   | -1.1 | 2.2 | 5.00E-05 |
| ENSG00000182179 | UBA7          | 0.2   | 0.4   | -1.1 | 2.2 | 0.0029   |
| ENSG00000152056 | AP1S3         | 12.9  | 28.3  | -1.1 | 2.2 | 5.00E-05 |



|                 |               |      |       |      |     |          |
|-----------------|---------------|------|-------|------|-----|----------|
| ENSG00000149798 | CDC42EP2      | 6.4  | 14.0  | -1.1 | 2.2 | 5.00E-05 |
| ENSG00000248590 | GLDCP1        | 0.1  | 0.3   | -1.1 | 2.2 | 0.00305  |
| ENSG00000104140 | RHOV          | 4.5  | 9.8   | -1.1 | 2.2 | 5.00E-05 |
| ENSG00000165244 | ZNF367        | 0.4  | 1.0   | -1.1 | 2.2 | 0.0038   |
| ENSG00000173848 | NET1          | 20.8 | 46.1  | -1.1 | 2.2 | 5.00E-05 |
| ENSG00000169116 | PARM1         | 8.6  | 19.1  | -1.1 | 2.2 | 5.00E-05 |
| ENSG00000225783 | MIAT          | 0.2  | 0.4   | -1.2 | 2.2 | 5.00E-05 |
| ENSG00000138193 | PLCE1         | 1.1  | 2.5   | -1.2 | 2.2 | 0.0004   |
| ENSG00000171219 | CDC42BPG      | 0.2  | 0.5   | -1.2 | 2.2 | 0.00355  |
| ENSG00000042493 | CAPG          | 15.9 | 35.9  | -1.2 | 2.3 | 5.00E-05 |
| ENSG00000142089 | IFITM3        | 17.0 | 38.4  | -1.2 | 2.3 | 5.00E-05 |
| ENSG00000166510 | CCDC68        | 9.5  | 21.4  | -1.2 | 2.3 | 5.00E-05 |
| ENSG00000204616 | TRIM31        | 0.4  | 1.0   | -1.2 | 2.3 | 0.0001   |
| ENSG00000094804 | CDC6          | 7.8  | 17.6  | -1.2 | 2.3 | 5.00E-05 |
| ENSG00000168743 | NPNT          | 0.2  | 0.5   | -1.2 | 2.3 | 0.00955  |
| ENSG00000113532 | ST8SIA4       | 3.3  | 7.6   | -1.2 | 2.3 | 5.00E-05 |
| ENSG00000261829 | RP11-223110.1 | 0.3  | 0.6   | -1.2 | 2.3 | 0.00845  |
| ENSG00000079385 | CEACAM1       | 7.6  | 17.4  | -1.2 | 2.3 | 0.00025  |
| ENSG00000163734 | CXCL3         | 11.7 | 26.9  | -1.2 | 2.3 | 5.00E-05 |
| ENSG00000080493 | SLC4A4        | 1.3  | 2.9   | -1.2 | 2.3 | 5.00E-05 |
| ENSG00000175040 | CHST2         | 0.7  | 1.7   | -1.2 | 2.3 | 5.00E-05 |
| ENSG00000163110 | PDLIM5        | 42.2 | 97.4  | -1.2 | 2.3 | 5.00E-05 |
| ENSG00000204262 | COL5A2        | 16.5 | 38.1  | -1.2 | 2.3 | 5.00E-05 |
| ENSG00000105289 | TJP3          | 3.4  | 7.9   | -1.2 | 2.3 | 5.00E-05 |
| ENSG00000054598 | FOXC1         | 4.4  | 10.2  | -1.2 | 2.3 | 5.00E-05 |
| ENSG00000239887 | C1orf226      | 0.5  | 1.2   | -1.2 | 2.3 | 0.0001   |
| ENSG00000082458 | DLG3          | 3.1  | 7.1   | -1.2 | 2.3 | 5.00E-05 |
| ENSG00000143842 | SOX13         | 5.6  | 13.0  | -1.2 | 2.3 | 5.00E-05 |
| ENSG00000198208 | RPS6KL1       | 0.3  | 0.6   | -1.2 | 2.3 | 0.0002   |
| ENSG00000235750 | KIAA0040      | 0.4  | 0.9   | -1.2 | 2.3 | 5.00E-05 |
| ENSG00000198157 | HMG5          | 1.5  | 3.6   | -1.2 | 2.3 | 0.0005   |
| ENSG00000163082 | SGPP2         | 2.8  | 6.5   | -1.2 | 2.3 | 5.00E-05 |
| ENSG00000150722 | PPP1R1C       | 0.7  | 1.7   | -1.2 | 2.3 | 0.0009   |
| ENSG00000171564 | FGF           | 80.2 | 188.4 | -1.2 | 2.3 | 5.00E-05 |
| ENSG00000168306 | ACOX2         | 1.8  | 4.3   | -1.2 | 2.4 | 5.00E-05 |
| ENSG00000172602 | RND1          | 5.2  | 12.3  | -1.2 | 2.4 | 5.00E-05 |
| ENSG00000186526 | CYP4F8        | 0.2  | 0.5   | -1.2 | 2.4 | 0.0069   |
| ENSG00000076356 | PLXNA2        | 2.3  | 5.3   | -1.2 | 2.4 | 5.00E-05 |
| ENSG00000180210 | F2            | 0.5  | 1.3   | -1.2 | 2.4 | 5.00E-05 |
| ENSG00000000971 | CFH           | 35.8 | 84.7  | -1.2 | 2.4 | 5.00E-05 |
| ENSG00000104537 | ANXA13        | 18.9 | 44.8  | -1.2 | 2.4 | 5.00E-05 |
| ENSG00000005981 | ASB4          | 0.5  | 1.3   | -1.3 | 2.4 | 0.0007   |
| ENSG00000106025 | TSPAN12       | 0.9  | 2.2   | -1.3 | 2.4 | 0.00025  |
| ENSG00000227502 | RP1-249H1.4   | 0.2  | 0.5   | -1.3 | 2.4 | 0.0005   |
| ENSG00000172159 | FRMD3         | 2.1  | 4.9   | -1.3 | 2.4 | 5.00E-05 |

|                 |               |        |        |      |     |          |
|-----------------|---------------|--------|--------|------|-----|----------|
| ENSG00000179913 | B3GNT3        | 3.9    | 9.5    | -1.3 | 2.4 | 5.00E-05 |
| ENSG00000185149 | NPY2R         | 0.2    | 0.4    | -1.3 | 2.4 | 0.0051   |
| ENSG00000101144 | BMP7          | 0.3    | 0.6    | -1.3 | 2.4 | 0.0003   |
| ENSG00000099725 | PRKY          | 0.5    | 1.2    | -1.3 | 2.4 | 0.00035  |
| ENSG00000226958 | CTD-2328D6.1  | 3166.3 | 7678.9 | -1.3 | 2.4 | 5.00E-05 |
| ENSG00000218052 | RP11-561C5.5  | 0.3    | 0.6    | -1.3 | 2.4 | 0.00775  |
| ENSG00000198692 | EIF1AY        | 10.4   | 25.3   | -1.3 | 2.4 | 5.00E-05 |
| ENSG00000170703 | TTLL6         | 0.8    | 1.9    | -1.3 | 2.4 | 5.00E-05 |
| ENSG00000157227 | MMP14         | 0.9    | 2.3    | -1.3 | 2.5 | 5.00E-05 |
| ENSG00000114200 | BCHE          | 1.0    | 2.4    | -1.3 | 2.5 | 5.00E-05 |
| ENSG00000012817 | KDM5D         | 2.7    | 6.7    | -1.3 | 2.5 | 0.00185  |
| ENSG00000171431 | KRT20         | 1.0    | 2.6    | -1.3 | 2.5 | 0.00015  |
| ENSG00000034063 | UHRF1         | 1.0    | 2.4    | -1.3 | 2.5 | 5.00E-05 |
| ENSG00000130600 | H19           | 0.3    | 0.6    | -1.3 | 2.5 | 0.0091   |
| ENSG00000170476 | MZB1          | 0.4    | 1.0    | -1.3 | 2.5 | 0.00125  |
| ENSG00000172137 | CALB2         | 0.3    | 0.8    | -1.3 | 2.5 | 5.00E-05 |
| ENSG00000172403 | SYNPO2        | 1.2    | 3.1    | -1.3 | 2.5 | 5.00E-05 |
| ENSG00000169894 | MUC3A         | 0.2    | 0.5    | -1.3 | 2.5 | 0.0015   |
| ENSG00000168237 | GLYCTK        | 4.4    | 11.1   | -1.3 | 2.5 | 0.00925  |
| ENSG00000101842 | VSIG1         | 0.1    | 0.4    | -1.3 | 2.5 | 0.00105  |
| ENSG00000174607 | UGT8          | 0.3    | 0.7    | -1.3 | 2.5 | 0.0004   |
| ENSG00000150471 | LPHN3         | 0.2    | 0.6    | -1.3 | 2.5 | 0.0007   |
| ENSG00000165061 | ZMAT4         | 0.5    | 1.3    | -1.3 | 2.5 | 0.0003   |
| ENSG00000257660 | RP11-579D7.4  | 0.7    | 1.9    | -1.3 | 2.5 | 0.00045  |
| ENSG00000132821 | VSTM2L        | 1.5    | 3.8    | -1.3 | 2.5 | 5.00E-05 |
| ENSG00000170373 | CST1          | 1.4    | 3.4    | -1.4 | 2.6 | 0.00015  |
| ENSG00000058085 | LAMC2         | 3.2    | 8.3    | -1.4 | 2.6 | 5.00E-05 |
| ENSG00000168772 | CXXC4         | 0.6    | 1.6    | -1.4 | 2.6 | 5.00E-05 |
| ENSG00000167766 | ZNF83         | 0.5    | 1.3    | -1.4 | 2.6 | 5.00E-05 |
| ENSG00000242147 | RP13-463N16.6 | 0.2    | 0.6    | -1.4 | 2.6 | 0.009    |
| ENSG00000004948 | CALCR         | 0.2    | 0.4    | -1.4 | 2.6 | 0.00045  |
| ENSG00000235269 | AL162759.1    | 3.0    | 7.7    | -1.4 | 2.6 | 5.00E-05 |
| ENSG00000115252 | PDE1A         | 0.3    | 0.9    | -1.4 | 2.6 | 0.00975  |
| ENSG00000117472 | TSPAN1        | 1.9    | 5.0    | -1.4 | 2.6 | 0.0031   |
| ENSG00000164976 | KIAA1161      | 3.2    | 8.2    | -1.4 | 2.6 | 5.00E-05 |
| ENSG00000250722 | SEPP1         | 0.8    | 2.1    | -1.4 | 2.6 | 5.00E-05 |
| ENSG00000168077 | SCARA3        | 2.5    | 6.7    | -1.4 | 2.6 | 5.00E-05 |
| ENSG00000147394 | ZNF185        | 2.3    | 5.9    | -1.4 | 2.6 | 5.00E-05 |
| ENSG00000095539 | SEMA4G        | 9.6    | 25.3   | -1.4 | 2.6 | 5.00E-05 |
| ENSG00000092853 | CLSPN         | 0.6    | 1.5    | -1.4 | 2.6 | 0.0011   |
| ENSG00000197959 | DNM3          | 0.3    | 0.9    | -1.4 | 2.6 | 0.0074   |
| ENSG00000235978 | AC018816.3    | 0.4    | 1.2    | -1.4 | 2.6 | 0.0046   |
| ENSG00000162777 | DENND2D       | 0.8    | 2.2    | -1.4 | 2.7 | 5.00E-05 |
| ENSG00000128849 | CGNL1         | 0.2    | 0.6    | -1.4 | 2.7 | 5.00E-05 |
| ENSG00000138792 | ENPEP         | 0.2    | 0.5    | -1.4 | 2.7 | 0.0006   |

|                 |               |      |       |      |     |          |
|-----------------|---------------|------|-------|------|-----|----------|
| ENSG00000125735 | TNFSF14       | 0.3  | 0.8   | -1.4 | 2.7 | 0.00035  |
| ENSG00000170959 | DCDC1         | 1.4  | 3.7   | -1.4 | 2.7 | 5.00E-05 |
| ENSG00000086730 | LAT2          | 1.3  | 3.4   | -1.4 | 2.7 | 5.00E-05 |
| ENSG00000171557 | FGG           | 83.2 | 222.7 | -1.4 | 2.7 | 5.00E-05 |
| ENSG00000205809 | KLRC2         | 1.5  | 3.9   | -1.4 | 2.7 | 0.00025  |
| ENSG00000184779 | RPS17         | 61.5 | 165.0 | -1.4 | 2.7 | 5.00E-05 |
| ENSG00000007968 | E2F2          | 0.2  | 0.6   | -1.4 | 2.7 | 5.00E-05 |
| ENSG00000198478 | SH3BGRL2      | 1.7  | 4.6   | -1.4 | 2.7 | 5.00E-05 |
| ENSG00000249867 | RP11-115J23.1 | 0.3  | 0.8   | -1.4 | 2.7 | 0.00375  |
| ENSG00000117226 | GBP3          | 1.1  | 3.0   | -1.4 | 2.7 | 5.00E-05 |
| ENSG00000168298 | HIST1H1E      | 0.2  | 0.4   | -1.4 | 2.7 | 0.00585  |
| ENSG00000154734 | ADAMTS1       | 0.2  | 0.4   | -1.4 | 2.7 | 0.00065  |
| ENSG00000198691 | ABCA4         | 0.1  | 0.4   | -1.4 | 2.7 | 0.0031   |
| ENSG00000129824 | RPS4Y1        | 60.3 | 163.8 | -1.4 | 2.7 | 5.00E-05 |
| ENSG00000006747 | SCIN          | 0.3  | 0.7   | -1.4 | 2.7 | 5.00E-05 |
| ENSG00000169213 | RAB3B         | 2.1  | 5.8   | -1.4 | 2.7 | 5.00E-05 |
| ENSG00000167244 | IGF2          | 0.3  | 0.7   | -1.5 | 2.7 | 5.00E-05 |
| ENSG00000119888 | EPCAM         | 1.8  | 5.0   | -1.5 | 2.7 | 5.00E-05 |
| ENSG00000105011 | ASF1B         | 1.5  | 4.1   | -1.5 | 2.7 | 5.00E-05 |
| ENSG00000198959 | TGM2          | 44.7 | 123.1 | -1.5 | 2.8 | 5.00E-05 |
| ENSG00000164142 | FAM160A1      | 0.2  | 0.4   | -1.5 | 2.8 | 0.00025  |
| ENSG00000182489 | XKRX          | 0.3  | 0.8   | -1.5 | 2.8 | 5.00E-05 |
| ENSG00000196628 | TCF4          | 1.7  | 4.7   | -1.5 | 2.8 | 5.00E-05 |
| ENSG00000125999 | BPIFB1        | 1.2  | 3.5   | -1.5 | 2.8 | 5.00E-05 |
| ENSG00000102554 | KLF5          | 23.0 | 64.1  | -1.5 | 2.8 | 5.00E-05 |
| ENSG00000144847 | IGSF11        | 0.7  | 2.0   | -1.5 | 2.8 | 5.00E-05 |
| ENSG00000231483 | RP11-336A10.5 | 0.2  | 0.6   | -1.5 | 2.8 | 0.00685  |
| ENSG00000177570 | SAMD12        | 0.5  | 1.3   | -1.5 | 2.8 | 5.00E-05 |
| ENSG00000133328 | HRASLS2       | 0.3  | 1.0   | -1.5 | 2.8 | 0.0003   |
| ENSG00000104490 | NCALD         | 2.2  | 6.2   | -1.5 | 2.8 | 5.00E-05 |
| ENSG00000169862 | CTNND2        | 0.1  | 0.4   | -1.5 | 2.8 | 0.00735  |
| ENSG00000065328 | MCM10         | 0.6  | 1.7   | -1.5 | 2.8 | 5.00E-05 |
| ENSG00000138798 | EGF           | 0.5  | 1.3   | -1.5 | 2.8 | 5.00E-05 |
| ENSG00000101412 | E2F1          | 1.8  | 5.1   | -1.5 | 2.8 | 5.00E-05 |
| ENSG00000166145 | SPINT1        | 0.6  | 1.6   | -1.5 | 2.8 | 5.00E-05 |
| ENSG00000151164 | RAD9B         | 0.1  | 0.4   | -1.5 | 2.8 | 0.00705  |
| ENSG00000130508 | PXDN          | 10.6 | 30.5  | -1.5 | 2.9 | 5.00E-05 |
| ENSG00000129173 | E2F8          | 0.2  | 0.7   | -1.5 | 2.9 | 5.00E-05 |
| ENSG00000165929 | TC2N          | 15.5 | 44.5  | -1.5 | 2.9 | 5.00E-05 |
| ENSG00000164626 | KCNK5         | 1.8  | 5.0   | -1.5 | 2.9 | 5.00E-05 |
| ENSG00000248771 | RP11-294O2.2  | 2.9  | 8.3   | -1.5 | 2.9 | 0.0001   |
| ENSG00000163053 | SLC16A14      | 0.2  | 0.7   | -1.5 | 2.9 | 5.00E-05 |
| ENSG00000140092 | FBLN5         | 1.9  | 5.5   | -1.5 | 2.9 | 5.00E-05 |
| ENSG00000127324 | TSPAN8        | 0.2  | 0.7   | -1.5 | 2.9 | 0.0034   |
| ENSG00000165246 | NLGN4Y        | 1.1  | 3.2   | -1.5 | 2.9 | 0.0055   |

|                 |               |       |       |      |     |          |
|-----------------|---------------|-------|-------|------|-----|----------|
| ENSG00000108602 | ALDH3A1       | 238.0 | 697.2 | -1.6 | 2.9 | 5.00E-05 |
| ENSG00000102854 | MSLN          | 0.5   | 1.6   | -1.6 | 2.9 | 0.00015  |
| ENSG00000176153 | GPX2          | 304.9 | 894.6 | -1.6 | 2.9 | 5.00E-05 |
| ENSG00000147689 | FAM83A        | 0.8   | 2.4   | -1.6 | 2.9 | 5.00E-05 |
| ENSG00000232721 | RP11-403I13.5 | 0.3   | 0.8   | -1.6 | 2.9 | 0.0022   |
| ENSG00000184530 | C6orf58       | 0.2   | 0.7   | -1.6 | 3.0 | 0.00695  |
| ENSG00000160183 | TMPRSS3       | 0.1   | 0.4   | -1.6 | 3.0 | 5.00E-05 |
| ENSG00000154146 | NRGN          | 0.3   | 0.8   | -1.6 | 3.0 | 0.005    |
| ENSG00000133067 | LGR6          | 0.9   | 2.9   | -1.6 | 3.0 | 5.00E-05 |
| ENSG00000102760 | RGCC          | 2.4   | 7.4   | -1.6 | 3.0 | 5.00E-05 |
| ENSG00000079112 | CDH17         | 13.2  | 40.3  | -1.6 | 3.0 | 5.00E-05 |
| ENSG00000085276 | MECOM         | 0.5   | 1.6   | -1.6 | 3.0 | 0.0001   |
| ENSG00000120217 | CD274         | 0.5   | 1.5   | -1.6 | 3.1 | 5.00E-05 |
| ENSG00000183878 | UTY           | 1.1   | 3.3   | -1.6 | 3.1 | 0.00025  |
| ENSG00000115008 | IL1A          | 0.1   | 0.3   | -1.6 | 3.1 | 0.00115  |
| ENSG00000019186 | CYP24A1       | 50.1  | 155.7 | -1.6 | 3.1 | 5.00E-05 |
| ENSG00000129270 | MMP28         | 0.4   | 1.2   | -1.6 | 3.1 | 0.00375  |
| ENSG00000164736 | SOX17         | 0.4   | 1.3   | -1.6 | 3.1 | 5.00E-05 |
| ENSG00000106078 | COBL          | 1.6   | 4.9   | -1.6 | 3.1 | 5.00E-05 |
| ENSG00000134531 | EMP1          | 1.6   | 5.2   | -1.6 | 3.1 | 5.00E-05 |
| ENSG00000189057 | FAM111B       | 0.4   | 1.2   | -1.6 | 3.1 | 5.00E-05 |
| ENSG00000159708 | LRRC36        | 0.2   | 0.8   | -1.7 | 3.2 | 5.00E-05 |
| ENSG00000233725 | LINC00284     | 0.2   | 0.7   | -1.7 | 3.2 | 0.00185  |
| ENSG00000101057 | MYBL2         | 2.7   | 8.5   | -1.7 | 3.2 | 5.00E-05 |
| ENSG00000168421 | RHOH          | 0.1   | 0.3   | -1.7 | 3.2 | 5.00E-05 |
| ENSG00000125968 | ID1           | 23.7  | 76.9  | -1.7 | 3.2 | 5.00E-05 |
| ENSG00000013588 | GPRC5A        | 36.1  | 117.7 | -1.7 | 3.3 | 5.00E-05 |
| ENSG00000226652 | PSMD10P2      | 0.2   | 0.8   | -1.7 | 3.3 | 0.0012   |
| ENSG00000162078 | ZG16B         | 1.3   | 4.2   | -1.7 | 3.3 | 5.00E-05 |
| ENSG00000204128 | C2orf72       | 3.0   | 9.7   | -1.7 | 3.3 | 5.00E-05 |
| ENSG00000133962 | CATSPERB      | 0.7   | 2.4   | -1.7 | 3.3 | 0.00025  |
| ENSG00000166863 | TAC3          | 0.1   | 0.5   | -1.7 | 3.3 | 0.0044   |
| ENSG00000123838 | C4BPA         | 6.6   | 21.8  | -1.7 | 3.3 | 5.00E-05 |
| ENSG00000135324 | MRAP2         | 0.4   | 1.3   | -1.7 | 3.3 | 5.00E-05 |
| ENSG00000225431 | AP001626.1    | 0.2   | 0.6   | -1.7 | 3.3 | 0.00015  |
| ENSG00000124102 | PI3           | 1.1   | 3.7   | -1.7 | 3.3 | 5.00E-05 |
| ENSG00000156966 | B3GNT7        | 0.3   | 0.8   | -1.7 | 3.4 | 5.00E-05 |
| ENSG00000165591 | FAAH2         | 1.0   | 3.2   | -1.7 | 3.4 | 5.00E-05 |
| ENSG00000134827 | TCN1          | 2.8   | 9.4   | -1.8 | 3.4 | 5.00E-05 |
| ENSG00000067646 | ZFY           | 0.8   | 2.9   | -1.8 | 3.4 | 5.00E-05 |
| ENSG00000005001 | PRSS22        | 0.6   | 2.1   | -1.8 | 3.4 | 5.00E-05 |
| ENSG00000150540 | HNMT          | 1.1   | 3.6   | -1.8 | 3.4 | 5.00E-05 |
| ENSG00000232306 | AC012485.2    | 0.9   | 3.0   | -1.8 | 3.4 | 5.00E-05 |
| ENSG00000079257 | LXN           | 6.2   | 21.2  | -1.8 | 3.4 | 0.0048   |
| ENSG00000133135 | RNF128        | 0.5   | 1.7   | -1.8 | 3.4 | 0.0003   |

|                 |                  |         |          |      |     |          |
|-----------------|------------------|---------|----------|------|-----|----------|
| ENSG00000154620 | TMSB4Y           | 0.2     | 0.5      | -1.8 | 3.5 | 0.00015  |
| ENSG00000149212 | SESN3            | 1.4     | 4.9      | -1.8 | 3.5 | 5.00E-05 |
| ENSG00000010438 | PRSS3            | 2.9     | 10.1     | -1.8 | 3.5 | 0.0059   |
| ENSG00000171345 | KRT19            | 40.5    | 143.5    | -1.8 | 3.5 | 5.00E-05 |
| ENSG00000239776 | AC079949.1       | 36882.2 | 130895.0 | -1.8 | 3.5 | 0.00335  |
| ENSG00000070526 | ST6GALNAC1       | 1.0     | 3.6      | -1.8 | 3.6 | 0.00015  |
| ENSG00000171848 | RRM2             | 5.3     | 18.9     | -1.8 | 3.6 | 5.00E-05 |
| ENSG00000255717 | SNHG1            | 95.6    | 343.3    | -1.8 | 3.6 | 5.00E-05 |
| ENSG00000182511 | FES              | 0.4     | 1.3      | -1.8 | 3.6 | 5.00E-05 |
| ENSG00000004799 | PDK4             | 10.4    | 37.5     | -1.9 | 3.6 | 5.00E-05 |
| ENSG00000105855 | ITGB8            | 0.4     | 1.6      | -1.9 | 3.6 | 5.00E-05 |
| ENSG00000170298 | LGALS9B          | 0.2     | 0.6      | -1.9 | 3.6 | 0.0017   |
| ENSG00000171246 | NPTX1            | 0.2     | 0.8      | -1.9 | 3.7 | 5.00E-05 |
| ENSG00000257335 | MGAM             | 0.7     | 2.5      | -1.9 | 3.7 | 5.00E-05 |
| ENSG00000121797 | CCRL2            | 0.2     | 0.6      | -1.9 | 3.7 | 0.00245  |
| ENSG00000131002 | TXLNG2P          | 6.7     | 24.6     | -1.9 | 3.7 | 5.00E-05 |
| ENSG00000136542 | GALNT5           | 1.5     | 5.6      | -1.9 | 3.7 | 5.00E-05 |
| ENSG00000141338 | ABCA8            | 0.2     | 0.8      | -1.9 | 3.7 | 5.00E-05 |
| ENSG00000161132 | XXbac-B444P24.10 | 0.3     | 1.1      | -1.9 | 3.8 | 5.00E-05 |
| ENSG00000064651 | SLC12A2          | 19.5    | 73.3     | -1.9 | 3.8 | 5.00E-05 |
| ENSG00000268358 | EPB41L4A-AS2     | 0.3     | 1.1      | -1.9 | 3.8 | 5.00E-05 |
| ENSG00000244128 | RP11-85M11.2     | 0.7     | 2.7      | -1.9 | 3.8 | 5.00E-05 |
| ENSG00000125266 | EFNB2            | 0.3     | 1.0      | -1.9 | 3.9 | 5.00E-05 |
| ENSG00000137440 | FGFBP1           | 0.8     | 3.3      | -2.0 | 3.9 | 5.00E-05 |
| ENSG00000171916 | LGALS9C          | 0.3     | 1.2      | -2.0 | 3.9 | 0.00415  |
| ENSG00000203697 | CAPN8            | 0.5     | 2.0      | -2.0 | 3.9 | 5.00E-05 |
| ENSG00000124664 | SPDEF            | 6.9     | 27.0     | -2.0 | 3.9 | 5.00E-05 |
| ENSG00000116106 | EPHA4            | 0.2     | 0.6      | -2.0 | 3.9 | 5.00E-05 |
| ENSG00000157542 | KCNJ6            | 0.2     | 0.8      | -2.0 | 3.9 | 0.0071   |
| ENSG00000263424 | CTD-2541J13.2    | 0.1     | 0.5      | -2.0 | 4.0 | 0.00455  |
| ENSG00000196074 | SYCP2            | 0.6     | 2.5      | -2.0 | 4.0 | 5.00E-05 |
| ENSG00000137809 | ITGA11           | 0.3     | 1.3      | -2.0 | 4.0 | 5.00E-05 |
| ENSG00000211448 | DIO2             | 0.9     | 3.4      | -2.0 | 4.0 | 5.00E-05 |
| ENSG00000165757 | KIAA1462         | 0.2     | 0.8      | -2.0 | 4.0 | 5.00E-05 |
| ENSG00000040731 | CDH10            | 0.3     | 1.0      | -2.0 | 4.0 | 0.00015  |
| ENSG00000214814 | FER1L6           | 0.3     | 1.2      | -2.0 | 4.0 | 5.00E-05 |
| ENSG00000130038 | EFCAB4B          | 0.3     | 1.3      | -2.0 | 4.0 | 5.00E-05 |
| ENSG00000144057 | ST6GAL2          | 3.3     | 13.7     | -2.0 | 4.1 | 5.00E-05 |
| ENSG00000100033 | PRODH            | 8.9     | 37.0     | -2.1 | 4.2 | 5.00E-05 |
| ENSG00000067048 | DDX3Y            | 5.5     | 23.0     | -2.1 | 4.2 | 5.00E-05 |
| ENSG00000198734 | F5               | 0.3     | 1.1      | -2.1 | 4.2 | 5.00E-05 |
| ENSG00000170369 | CST2             | 0.1     | 0.4      | -2.1 | 4.2 | 0.00055  |
| ENSG00000174502 | SLC26A9          | 0.2     | 0.8      | -2.1 | 4.2 | 5.00E-05 |
| ENSG00000154188 | ANGPT1           | 0.5     | 2.0      | -2.1 | 4.3 | 5.00E-05 |
| ENSG00000243955 | GSTA1            | 0.3     | 1.3      | -2.1 | 4.3 | 0.0001   |

|                 |               |      |       |      |     |          |
|-----------------|---------------|------|-------|------|-----|----------|
| ENSG00000129595 | EPB41L4A      | 1.6  | 6.9   | -2.1 | 4.3 | 5.00E-05 |
| ENSG00000105523 | FAM83E        | 0.2  | 0.7   | -2.1 | 4.3 | 5.00E-05 |
| ENSG00000119139 | TJP2          | 1.0  | 4.2   | -2.1 | 4.3 | 5.00E-05 |
| ENSG00000181634 | TNFSF15       | 1.6  | 7.0   | -2.1 | 4.4 | 5.00E-05 |
| ENSG00000042980 | ADAM28        | 1.4  | 6.3   | -2.1 | 4.4 | 5.00E-05 |
| ENSG00000169562 | GJB1          | 0.1  | 0.5   | -2.1 | 4.4 | 0.00015  |
| ENSG00000054179 | ENTPD2        | 1.0  | 4.2   | -2.1 | 4.4 | 5.00E-05 |
| ENSG00000185432 | METTL7A       | 0.1  | 0.6   | -2.1 | 4.4 | 5.00E-05 |
| ENSG00000172572 | PDE3A         | 2.6  | 11.4  | -2.2 | 4.5 | 5.00E-05 |
| ENSG00000175161 | CADM2         | 0.1  | 0.6   | -2.2 | 4.5 | 0.005    |
| ENSG00000170477 | KRT4          | 0.6  | 2.9   | -2.2 | 4.5 | 5.00E-05 |
| ENSG00000050438 | SLC4A8        | 0.3  | 1.4   | -2.2 | 4.5 | 5.00E-05 |
| ENSG00000111348 | ARHGDI1B      | 0.2  | 0.8   | -2.2 | 4.6 | 0.0004   |
| ENSG00000127863 | TNFRSF19      | 0.4  | 1.9   | -2.2 | 4.6 | 5.00E-05 |
| ENSG00000166866 | MYO1A         | 0.2  | 0.8   | -2.2 | 4.6 | 5.00E-05 |
| ENSG00000264462 | MIR3648       | 11.4 | 52.0  | -2.2 | 4.6 | 5.00E-05 |
| ENSG00000184574 | LPAR5         | 0.1  | 0.4   | -2.2 | 4.6 | 5.00E-05 |
| ENSG00000261183 | RP11-532F12.5 | 0.1  | 0.4   | -2.2 | 4.6 | 0.0003   |
| ENSG00000101276 | SLC52A3       | 0.4  | 1.9   | -2.2 | 4.6 | 5.00E-05 |
| ENSG00000169903 | TM4SF4        | 6.7  | 31.2  | -2.2 | 4.6 | 5.00E-05 |
| ENSG00000185499 | MUC1          | 7.4  | 34.9  | -2.2 | 4.7 | 5.00E-05 |
| ENSG00000164488 | DACT2         | 0.1  | 0.6   | -2.3 | 4.8 | 0.00015  |
| ENSG00000171346 | KRT15         | 0.5  | 2.4   | -2.3 | 4.9 | 5.00E-05 |
| ENSG00000006042 | TMEM98        | 2.5  | 12.5  | -2.3 | 4.9 | 5.00E-05 |
| ENSG00000089127 | OAS1          | 8.5  | 41.9  | -2.3 | 4.9 | 5.00E-05 |
| ENSG00000198758 | EPS8L3        | 0.9  | 4.6   | -2.3 | 5.0 | 5.00E-05 |
| ENSG00000133519 | ZDHHC8P1      | 0.9  | 4.6   | -2.3 | 5.0 | 5.00E-05 |
| ENSG00000170775 | GPR37         | 2.1  | 10.5  | -2.3 | 5.0 | 5.00E-05 |
| ENSG00000179766 | ATP8B5P       | 0.4  | 1.8   | -2.4 | 5.1 | 5.00E-05 |
| ENSG00000137672 | TRPC6         | 2.6  | 13.2  | -2.4 | 5.1 | 5.00E-05 |
| ENSG00000225840 | AC010970.2    | 37.2 | 193.6 | -2.4 | 5.2 | 5.00E-05 |
| ENSG00000182795 | C1orf116      | 0.6  | 3.2   | -2.4 | 5.2 | 5.00E-05 |
| ENSG00000131746 | TNS4          | 3.7  | 19.5  | -2.4 | 5.3 | 5.00E-05 |
| ENSG00000166143 | PPP1R14D      | 0.3  | 1.5   | -2.4 | 5.3 | 0.0004   |
| ENSG00000133687 | TMTC1         | 0.1  | 0.6   | -2.4 | 5.4 | 5.00E-05 |
| ENSG00000261069 | SNORD116-20   | 1.5  | 8.4   | -2.4 | 5.4 | 0.00335  |
| ENSG00000248605 | CTD-2306M5.1  | 0.4  | 2.2   | -2.4 | 5.4 | 5.00E-05 |
| ENSG00000270066 | SCARNA2       | 0.3  | 1.4   | -2.4 | 5.5 | 5.00E-05 |
| ENSG00000148700 | ADD3          | 2.3  | 12.5  | -2.5 | 5.5 | 5.00E-05 |
| ENSG00000198848 | CES1          | 9.8  | 54.5  | -2.5 | 5.5 | 5.00E-05 |
| ENSG00000145335 | SNCA          | 1.6  | 8.6   | -2.5 | 5.6 | 5.00E-05 |
| ENSG00000206159 | GYG2P1        | 0.3  | 1.4   | -2.5 | 5.6 | 0.0002   |
| ENSG00000234928 | AP000344.3    | 0.1  | 0.6   | -2.5 | 5.7 | 0.00935  |
| ENSG00000100079 | LGALS2        | 0.3  | 1.5   | -2.5 | 5.7 | 5.00E-05 |
| ENSG00000081138 | CDH7          | 0.2  | 1.2   | -2.5 | 5.7 | 5.00E-05 |

|                 |              |       |       |      |      |          |
|-----------------|--------------|-------|-------|------|------|----------|
| ENSG00000147676 | MAL2         | 2.2   | 12.9  | -2.5 | 5.8  | 5.00E-05 |
| ENSG00000175311 | ANKS4B       | 0.3   | 1.9   | -2.6 | 5.9  | 5.00E-05 |
| ENSG00000128573 | FOXP2        | 0.1   | 0.9   | -2.6 | 5.9  | 5.00E-05 |
| ENSG00000137699 | TRIM29       | 0.8   | 4.7   | -2.6 | 6.0  | 5.00E-05 |
| ENSG00000137393 | RNF144B      | 0.7   | 4.4   | -2.6 | 6.1  | 5.00E-05 |
| ENSG00000154175 | ABI3BP       | 0.2   | 1.0   | -2.6 | 6.1  | 5.00E-05 |
| ENSG00000184305 | CCSER1       | 0.1   | 0.5   | -2.6 | 6.1  | 5.00E-05 |
| ENSG00000215182 | MUC5AC       | 5.6   | 34.5  | -2.6 | 6.2  | 5.00E-05 |
| ENSG00000077264 | PAK3         | 0.2   | 1.5   | -2.6 | 6.2  | 5.00E-05 |
| ENSG00000251705 | RNA5-8SP6    | 105.9 | 665.7 | -2.7 | 6.3  | 5.00E-05 |
| ENSG00000160180 | TFF3         | 0.3   | 1.8   | -2.7 | 6.3  | 0.00055  |
| ENSG00000169851 | PCDH7        | 0.5   | 3.4   | -2.7 | 6.5  | 5.00E-05 |
| ENSG00000072858 | SIDT1        | 0.6   | 4.0   | -2.7 | 6.5  | 5.00E-05 |
| ENSG00000157613 | CREB3L1      | 0.5   | 3.2   | -2.7 | 6.5  | 5.00E-05 |
| ENSG00000176658 | MYO1D        | 1.2   | 7.7   | -2.7 | 6.7  | 5.00E-05 |
| ENSG00000151715 | TMEM45B      | 0.3   | 1.7   | -2.7 | 6.7  | 5.00E-05 |
| ENSG00000110195 | FOLR1        | 0.1   | 0.5   | -2.8 | 6.8  | 5.00E-05 |
| ENSG00000188959 | C9orf152     | 0.7   | 4.9   | -2.8 | 6.8  | 5.00E-05 |
| ENSG00000085117 | CD82         | 0.7   | 4.5   | -2.8 | 6.8  | 5.00E-05 |
| ENSG00000227640 | SOX21-AS1    | 0.6   | 3.8   | -2.8 | 6.8  | 5.00E-05 |
| ENSG00000073282 | TP63         | 0.5   | 3.3   | -2.8 | 6.8  | 5.00E-05 |
| ENSG00000134258 | VTCN1        | 0.6   | 4.1   | -2.8 | 7.1  | 5.00E-05 |
| ENSG00000202198 | RN7SK        | 21.4  | 152.3 | -2.8 | 7.1  | 5.00E-05 |
| ENSG00000148513 | ANKRD30A     | 0.2   | 1.2   | -2.8 | 7.2  | 5.00E-05 |
| ENSG00000177335 | C8orf31      | 0.0   | 0.4   | -2.9 | 7.7  | 0.00085  |
| ENSG00000119125 | GDA          | 0.5   | 4.2   | -2.9 | 7.7  | 5.00E-05 |
| ENSG00000121005 | CRISPLD1     | 0.1   | 0.9   | -3.0 | 7.7  | 0.00035  |
| ENSG00000180178 | AC018865.8   | 0.1   | 0.8   | -3.0 | 7.9  | 5.00E-05 |
| ENSG00000226377 | AC084809.2   | 0.1   | 1.1   | -3.0 | 8.3  | 0.00665  |
| ENSG00000111885 | MAN1A1       | 0.1   | 0.4   | -3.1 | 8.6  | 5.00E-05 |
| ENSG00000135373 | EHF          | 3.6   | 31.4  | -3.1 | 8.6  | 5.00E-05 |
| ENSG00000163736 | PPBP         | 0.1   | 0.6   | -3.2 | 9.0  | 0.00015  |
| ENSG00000180861 | C12orf36     | 0.1   | 0.6   | -3.2 | 9.0  | 5.00E-05 |
| ENSG00000200434 | RNA5-8SP2    | 8.3   | 75.4  | -3.2 | 9.0  | 5.00E-05 |
| ENSG00000215808 | RP11-371I1.2 | 0.1   | 1.3   | -3.2 | 9.2  | 0.003    |
| ENSG00000235687 | LINC00993    | 0.4   | 3.4   | -3.2 | 9.3  | 0.0007   |
| ENSG00000007952 | NOX1         | 0.2   | 1.7   | -3.2 | 9.4  | 5.00E-05 |
| ENSG00000012779 | ALOX5        | 0.6   | 6.1   | -3.3 | 9.7  | 5.00E-05 |
| ENSG00000064787 | BCAS1        | 0.2   | 1.9   | -3.3 | 9.8  | 5.00E-05 |
| ENSG00000110934 | BIN2         | 0.1   | 0.5   | -3.3 | 9.9  | 5.00E-05 |
| ENSG00000197614 | MFAP5        | 0.1   | 1.1   | -3.3 | 10.0 | 5.00E-05 |
| ENSG00000125285 | SOX21        | 0.4   | 3.7   | -3.3 | 10.2 | 5.00E-05 |
| ENSG00000255774 | AP000439.3   | 0.2   | 1.6   | -3.4 | 10.2 | 5.00E-05 |
| ENSG00000269900 | RMRP         | 17.2  | 184.9 | -3.4 | 10.7 | 5.00E-05 |
| ENSG00000090920 | FCGBP        | 2.5   | 27.7  | -3.4 | 10.9 | 5.00E-05 |

|                 |               |     |       |      |       |          |
|-----------------|---------------|-----|-------|------|-------|----------|
| ENSG00000196620 | UGT2B15       | 0.1 | 1.1   | -3.6 | 11.9  | 5.00E-05 |
| ENSG00000196741 | CXorf24       | 1.2 | 15.2  | -3.7 | 13.1  | 5.00E-05 |
| ENSG00000114638 | UPK1B         | 1.0 | 13.5  | -3.8 | 13.7  | 5.00E-05 |
| ENSG00000114378 | HYAL1         | 0.2 | 3.0   | -3.8 | 14.2  | 5.00E-05 |
| ENSG00000136155 | SCEL          | 0.1 | 1.6   | -3.8 | 14.3  | 5.00E-05 |
| ENSG00000248434 | RP11-553P9.2  | 0.1 | 2.1   | -3.8 | 14.4  | 5.00E-05 |
| ENSG00000259001 | RPPH1         | 6.4 | 93.6  | -3.9 | 14.7  | 0.00795  |
| ENSG00000006210 | CX3CL1        | 0.6 | 9.5   | -3.9 | 15.2  | 5.00E-05 |
| ENSG00000173702 | MUC13         | 7.1 | 109.2 | -3.9 | 15.3  | 5.00E-05 |
| ENSG00000007216 | SLC13A2       | 0.0 | 0.4   | -4.0 | 16.1  | 0.0003   |
| ENSG00000257588 | RP11-469H8.6  | 0.0 | 0.5   | -4.1 | 17.6  | 5.00E-05 |
| ENSG00000044012 | GUCA2B        | 0.0 | 0.8   | -4.1 | 17.7  | 0.0048   |
| ENSG00000160182 | TFF1          | 1.2 | 22.2  | -4.2 | 17.9  | 5.00E-05 |
| ENSG00000230937 | MIR205HG      | 0.3 | 5.8   | -4.2 | 18.7  | 5.00E-05 |
| ENSG00000159763 | PIP           | 0.2 | 4.7   | -4.3 | 19.3  | 5.00E-05 |
| ENSG00000150667 | FSIP1         | 0.5 | 10.2  | -4.5 | 21.9  | 5.00E-05 |
| ENSG00000250775 | RP11-12K22.1  | 0.0 | 0.8   | -4.6 | 23.5  | 0.00035  |
| ENSG00000167165 | UGT1A6        | 0.3 | 6.4   | -4.6 | 23.6  | 5.00E-05 |
| ENSG00000224259 | RP11-48020.4  | 0.2 | 3.9   | -4.6 | 24.1  | 0.00075  |
| ENSG00000257512 | RP11-486A14.1 | 0.2 | 5.9   | -4.6 | 24.3  | 5.00E-05 |
| ENSG00000164418 | GRIK2         | 0.1 | 3.5   | -4.6 | 24.9  | 5.00E-05 |
| ENSG00000087916 | SLC6A14       | 0.1 | 2.1   | -4.7 | 25.2  | 5.00E-05 |
| ENSG00000105388 | CEACAM5       | 0.2 | 5.4   | -4.8 | 28.0  | 0.0004   |
| ENSG00000127831 | VIL1          | 0.2 | 7.4   | -4.9 | 30.7  | 5.00E-05 |
| ENSG00000138650 | PCDH10        | 0.1 | 2.0   | -5.0 | 31.7  | 5.00E-05 |
| ENSG00000244474 | UGT1A4        | 0.0 | 0.3   | -5.3 | 40.6  | 0.0001   |
| ENSG00000260908 | CTB-134H23.3  | 0.2 | 7.9   | -5.6 | 48.7  | 5.00E-05 |
| ENSG00000135333 | EPHA7         | 0.0 | 3.6   | -6.3 | 77.5  | 0.0065   |
| ENSG00000261043 | MIR4313       | 0.0 | 3.3   | -6.4 | 84.1  | 0.00015  |
| ENSG00000086548 | CEACAM6       | 2.4 | 266.8 | -6.8 | 109.9 | 5.00E-05 |
| ENSG00000241635 | UGT1A1        | 1.0 | 121.6 | -6.9 | 118.7 | 5.00E-05 |
| ENSG00000265506 | AC004656.1    | 0.0 | 90.3  | NA   | NA    | 0.00355  |



Table S8. List of enriched gene pathways from DAVID gene ontology analysis of significantly differentially expressed genes with  $\geq 1.5$ -fold change in expression following EHF overexpression.

| Term                                 | P Value  | Genes                                                                                                                                                                                                                                                                                                                                                                                                                                                                                                                                                                                                                                                                                                                                                                                                                                                                                                                                                                                                                                                                                                                                                                                                                                                                                                  |
|--------------------------------------|----------|--------------------------------------------------------------------------------------------------------------------------------------------------------------------------------------------------------------------------------------------------------------------------------------------------------------------------------------------------------------------------------------------------------------------------------------------------------------------------------------------------------------------------------------------------------------------------------------------------------------------------------------------------------------------------------------------------------------------------------------------------------------------------------------------------------------------------------------------------------------------------------------------------------------------------------------------------------------------------------------------------------------------------------------------------------------------------------------------------------------------------------------------------------------------------------------------------------------------------------------------------------------------------------------------------------|
| GO:0044421~extracellular region part | 2.37E-13 | TNFSF15, TNFSF14, TNFSF13, IL15, SHH, IL11, WNT4, APOD, CD44, APOE, TGFBI, CFH, COL12A1, LOX, WNT6, CFD, TFPI2, IL1A, MATN3, FIBCD1, VEGFC, THBD, PPBP, F5, SERPINF2, F2, ADAMTS1, LAMC2, COL1A1, MFAP5, RBP4, CCL2, ERBB3, APOC1, CD70, CX3CL1, GREM1, LAMB3, FGG, ACE, BCHE, FGB, TFF3, FGL1, TFF1, EGF, ENTPD2, ANGPTL4, EFEMP1, ECM1, TNFSF10, APOL1, COL14A1, LAMA3, PI3, TGFBR3, MUC5AC, AREG, BMP7, INSL4, NPNT, SORL1, MMP28, VGF, CFHR3, METRN, DMKN, HMOX1, GPC6, GPX3, ANGPT1, SEPP1, VWA1, LOXL2, HYAL1, MMP14, NPTXR, ADM, KCP, CA2, TF, CCK, CXCL5, C3, CXCL3, C5, ADAMTS15, SPOCK1, SFN, TAC3, CPN1, COL7A1, AGT, PRSS3, ADAMTS12, PLA2R1, FGFBP1, SCG2, COL4A3, FLRT2, IL6, FBN1, NID1, IGF2, TNFSF9, COL5A2, COL5A1, HPX, FBLN5, KAZALD1, AKR1B1, IGFBP1, IGFBP4                                                                                                                                                                                                                                                                                                                                                                                                                                                                                                                      |
| GO:0005576~extracellular region      | 6.97E-11 | NRTN, C6ORF58, C2ORF72, TNFSF15, TNFSF14, TNFSF13, EDIL3, IL15, SHH, IL11, OLFML3, WNT4, BDNF, CD44, APOD, APOE, TGFBI, SERPINE1, CFH, COL12A1, LOX, CFD, WNT6, GUCA2B, TFPI2, MUC13, IL1A, HHIPL2, MATN3, STC2, CST2, CST1, FIBCD1, F7, TCN1, PLAUR, VEGFC, THBD, PPBP, F5, SERPINF2, F2, ADAMTS1, LAMC2, COL1A1, MFAP5, FGFR2, PAM, RBP4, CCL2, IGFBPL1, ERBB3, APOC1, CD70, CX3CL1, GREM1, ITGBL1, LAMB3, ACE, FGG, BCHE, FOLR1, FGB, MSLN, PIP, HEG1, TFF3, CDA, FGL1, TFF1, EGF, PCDHA13, ENTPD2, LFNG, ANGPTL4, MUC1, ADAM28, MGAT4A, IGFL4, ADAM23, EFEMP1, ECM1, GAS6, APOL2, TNFSF10, LAMA3, COL14A1, APOL1, PI3, TGFBR3, MUC5AC, AREG, FCGBP, BMP7, PXDN, INSL4, NXPH4, NPNT, SORL1, MMP28, VGF, METRN, CFHR3, WISP2, RSPO3, HMOX1, GPC6, DMKN, GPX3, ITIH5, SEMA3B, ANGPT1, SEPP1, LOXL2, VWA1, TSKU, CEACAM1, CSF2RA, KIRREL3, CYR61, HYAL1, SPINT1, MMP14, INHBB, MUC3A, NPTXR, ADM, INHBE, KCP, CTSD, SLPI, SCGB3A2, CA2, CTSB, C1QL4, TF, GALNT1, CCK, CXCL5, C3, CXCL3, C5, ADAMTS15, SPOCK1, SFN, CPN1, TAC3, ZG16B, GLIPR2, C1QTNF6, PRRG4, PLIN2, COL7A1, CRISPLD1, AGT, PRSS3, ADAMTS12, PLA2R1, FGFBP1, SCG2, FLRT2, COL4A3, IL6, SVEP1, PLAC1, FBN1, IGF2, NID1, C4BPB, C4BPA, TNFSF9, COL5A2, COL5A1, NTS, C3ORF58, HPX, KAZALD1, FBLN5, AKR1B1, IGFBP1, PRSS23, PRSS22, IGFBP4 |
| GO:0044459~plasma membrane part      | 4.74E-10 | DLC1, KLRC2, RP2, SYT6, AQP3, S1PR3, AGTR1, DIRAS2, CD44, APOE, KCNK5, CHRNA7, HTR1D, GRID1, F11R, MAGI3, EFNB2, PTPRO, CTNNA2,                                                                                                                                                                                                                                                                                                                                                                                                                                                                                                                                                                                                                                                                                                                                                                                                                                                                                                                                                                                                                                                                                                                                                                        |

|                                |          |                                                                                                                                                                                                                                                                                                                                                                                                                                                                                                                                                                                                                                                                                                                                                                                                                                                                                                                                                                                                                                                                                                                                                                                                                                                                                                                  |
|--------------------------------|----------|------------------------------------------------------------------------------------------------------------------------------------------------------------------------------------------------------------------------------------------------------------------------------------------------------------------------------------------------------------------------------------------------------------------------------------------------------------------------------------------------------------------------------------------------------------------------------------------------------------------------------------------------------------------------------------------------------------------------------------------------------------------------------------------------------------------------------------------------------------------------------------------------------------------------------------------------------------------------------------------------------------------------------------------------------------------------------------------------------------------------------------------------------------------------------------------------------------------------------------------------------------------------------------------------------------------|
|                                |          | CCR7, RND1, RHCG, LAMC2, MST1R, ADD3, ERBB3, ITGA11, CD70, FCGRT, BDKRB2, KCNJ2, RAB40B, ITGBL1, RIMS3, ACE, PVRL3, KCNK1, KCNK3, EPHA2, CAMK2N1, SYNGR3, NTRK3, EPHA4, EPHA7, KCNJ6, LAMA3, EPS8, PKP2, TGFBR3, MAP7, KCNH1, LIMA1, MCF2L, AP1S3, SLC23A2, CEACAM6, CEACAM5, ATP6V0D2, KCNG1, CEACAM1, KCNMA1, GPR176, CACNG7, MMP14, DOK7, SLC26A9, SGCD, TF, RAB3B, PARD3, SHROOM3, LIMS2, NPY2R, C5, GPR64, APBB1IP, GPHN, CD22, FUT1, DTNA, FLRT2, IL6, GJB1, GJB2, SLC16A2, SLC16A7, CDH17, TJP3, TJP2, GRIK2, TNFSF15, TSPAN7, TNFSF13, IL15, ENPEP, VIPR1, CALB2, SLC7A7, ANK3, SLC4A4, SLC4A3, TNS4, THBD, ARRB1, VAMP1, SPTB, CGNL1, FXYD2, CAV2, DRD1, FGFR4, ADORA2B, ITGB4, ABCA1, ABCA4, FGG, P2RY6, FGB, FOLR1, ITGB8, ADRA2A, B3GNT3, SLC30A3, PCDHA13, GABRP, MUC1, HCN2, DIXDC1, MYO1A, CACNA2D1, ADAM23, LPP, SYT11, PODXL, SYT12, SLC6A14, SLC6A17, TNFSF10, DSG2, GPR37, SLC7A2, CD274, CACNA1G, SLC13A2, MERTK, SCARA5, ADRA1D, CLDN4, TACR1, SORL1, BCAM, RHOV, SYNGR2, SDC2, EPCAM, CCRL2, KCNQ5, GPC6, HMOX1, SDPR, RHOF, SLC43A1, CSF2RA, RHOH, GABRG3, PRKCI, PCDH7, UGT1A1, MUC3A, CHRM3, CD82, CNTN1, CTSB, CA2, TM4SF4, CALCR, CTNND2, GPRC5A, ANXA6, UGT1A6, HRH1, RASGRP2, UGT1A4, PLA2R1, PTPRB, SLC12A2, NOX1, TSPAN13, SLC17A7, KCNN4, TMEM47, SLC17A3, SLC17A1, DSC2, BMPR1B |
| GO:0005615~extracellular space | 2.01E-09 | INSL4, SORL1, TNFSF15, TNFSF14, TNFSF13, IL15, VGF, SHH, IL11, CFHR3, METRN, APOD, APOE, DMKN, GPC6, HMOX1, GPX3, TGFBI, CFH, ANGPT1, SEPP1, LOX, LOXL2, CFD, IL1A, HYAL1, FIBCD1, VEGFC, NPTXR, THBD, PPBP, F5, ADM, SERPINF2, F2, KCP, LAMC2, CA2, TF, RBP4, CCL2, CCK, CXCL5, ERBB3, C3, CXCL3, C5, APOC1, CD70, CX3CL1, SFN, GREM1, TAC3, CPN1, FGG, ACE, BCHE, FGB, AGT, PRSS3, FGL1, TFF1, PLA2R1, EGF, FGFBP1, ANGPTL4, SCG2, IL6, FBN1, IGF2, TNFSF9, TNFSF10, APOL1, HPX, AKR1B1, TGFBR3, IGFBP1, AREG, BMP7, IGFBP4                                                                                                                                                                                                                                                                                                                                                                                                                                                                                                                                                                                                                                                                                                                                                                                    |
| GO:0005886~plasma membrane     | 1.65E-08 | DLC1, KLRC2, ADCY1, VTCN1, GPR124, RP2, SNCA, SYT6, MEGF11, SHH, AQP3, LPHN2, AGTR1, LPHN3, S1PR3, DIRAS2, MALL, CD44, APOE, KCNK5, SERPINE1, S1PR5, CHRNA7, HTR1D, MUC13, GRID1, F11R, MAGI3, CRYAB, EFN2, PTPRR, F7, PTPRO, SIRPA, PLAUR, CTNNA2, CCR7, KRT19, RND1, F5, LPAR5, RHCG, F2, MGAM, LAMC2, MST1R, ADD3, SLC2A13, ERBB3, ITGA11, FCGRT, CD70, BDKRB2, KCNJ2, RAB40B, RIMS3, ITGBL1, ACE, CDC42EP2, PVRL3, TRPC6, PCDH10, PPFIBP1, KCNK1, SYNGR3, EPHA2, KCNK3,                                                                                                                                                                                                                                                                                                                                                                                                                                                                                                                                                                                                                                                                                                                                                                                                                                      |

|                                         |          |                                                                                                                                                                                                                                                                                                                                                                                                                                                                                                                                                                                                                                                                                                                                                                                                                                                                                                                                                                                                                                                                                                                                                                                                                                                                                                                                                                                                                                                                                                                                                                                                                                                                                     |
|-----------------------------------------|----------|-------------------------------------------------------------------------------------------------------------------------------------------------------------------------------------------------------------------------------------------------------------------------------------------------------------------------------------------------------------------------------------------------------------------------------------------------------------------------------------------------------------------------------------------------------------------------------------------------------------------------------------------------------------------------------------------------------------------------------------------------------------------------------------------------------------------------------------------------------------------------------------------------------------------------------------------------------------------------------------------------------------------------------------------------------------------------------------------------------------------------------------------------------------------------------------------------------------------------------------------------------------------------------------------------------------------------------------------------------------------------------------------------------------------------------------------------------------------------------------------------------------------------------------------------------------------------------------------------------------------------------------------------------------------------------------|
|                                         |          | <p>CAMK2N1, ABCG2, NTRK3, EPHA4, GGT5, EPHA7, LAMA3, KCNJ6, EPS8, PKP2, TGFBR3, MAP7, NRP2, KCNH1, SLC16A14, LIMA1, MARCKSL1, SUSD2, MCF2L, AP1S3, SLC23A2, CEACAM6, CEACAM5, ATP6V0D2, NT5E, CEACAM1, DPEP1, KCNG1, KCNMA1, ADAM11, GPR176, CACNG7, MMP14, EPB41L1, ALG10B, SLC26A9, DOK7, NAB1, SGCD, TF, RAB3B, PARD3, SHROOM3, LIMS2, PLEK2, NPY2R, GPR64, C5, XKRX, APBB1IP, DGKA, IGSF11, GPHN, ACSL1, PLIN2, CD22, FUT1, DTNA, FLRT2, PLA2G16, IL6, NOS1, MAPK10, GJB1, GJB2, SLC16A2, CDH15, SLC16A7, PTP4A3, CDH17, GFRA1, TJP3, TJP2, ABCC8, CDH10, GRIK2, PLXNA2, TNFSF15, TNFSF14, TSPAN7, TNFSF13, IL15, ENPEP, VIPR1, IL17RD, CALB2, SLC7A7, ANK3, SLC2A3, SLC4A4, SLC4A3, IRS2, BAIAP2, BASP1, TNS4, LAT2, PLCE1, THBD, RASGRF2, ARRB1, COL1A1, LRRK2, VAMP1, EMP1, SPTB, ABCA8, FGFR2, CAV2, FXYD2, CGNL1, FGFR4, DRD1, ADORA2B, IFITM3, ITGB4, NKAIN4, ANKS4B, ABCA1, CX3CL1, ABCA4, FGG, P2RY6, FGB, FOLR1, ITGB8, MSLN, DDX3Y, ADRA2A, B3GNT3, SLC30A3, PCDHA13, EGF, BMF, GABRP, ADAM28, MUC1, DIXDC1, HCN2, CACNA2D1, MYO1A, ADAM23, LPP, PODXL, SYT11, SYT12, SLC6A14, SLC6A17, TNFSF10, GPR37, DIO2, DSG2, SLC7A2, CD274, PLCG2, CACNA1G, SLC13A2, MERTK, SCARA5, ADRA1D, CLDN4, TACR1, SORL1, BCAM, RHOV, LGR6, SYNGR2, SDC2, CCRL2, EPCAM, KCNQ5, WISP2, HMOX1, GPC6, SDPR, RHOF, SLC43A1, CSF2RA, SLC43A2, KIRREL3, RHOH, SGK1, GABRG3, PRKCI, PCDH9, PCDH7, UGT1A1, MUC3A, NPTXR, CHRM3, CD82, CNTN1, CA2, CTSB, TM4SF4, CALCR, MAL2, CTNND2, PCDHGC3, GPRC5A, ANXA6, UGT1A6, CDH7, HRH1, UGT1A4, RASGRP2, TGM2, PALM3, PLA2R1, FGFBP1, PTPRB, SLC12A2, NOX1, TSPAN13, SLC17A7, KCNN4, TMEM47, SLC17A3, SLC17A1, DSC2, ANXA13, ALOX5, BMPR1B, GPR115</p> |
| GO:0031226~intrinsic to plasma membrane | 2.60E-08 | <p>KLRC2, GRIK2, TNFSF15, TSPAN7, TNFSF13, ENPEP, IL15, VIPR1, SLC7A7, S1PR3, AGTR1, CD44, KCNK5, CHRNA7, SLC4A4, HTR1D, SLC4A3, EFNB2, PTPRO, CCR7, THBD, RHCG, MST1R, VAMP1, SPTB, CAV2, FXYD2, FGFR4, DRD1, ADORA2B, ERBB3, ITGA11, ITGB4, CD70, BDKRB2, ABCA1, KCNJ2, ABCA4, ITGBL1, P2RY6, ITGB8, FOLR1, ADRA2A, B3GNT3, SLC30A3, PCDHA13, MUC1, HCN2, ADAM23, PODXL, SYT11, SLC6A14, SLC6A17, KCNK1, KCNK3, EPHA2, SYNGR3, NTRK3, EPHA4, EPHA7, TNFSF10, KCNJ6, GPR37, EPS8, SLC7A2, SLC13A2, TGFBR3, MERTK, SCARA5, ADRA1D, KCNH1, CLDN4, TACR1, SORL1, BCAM, SYNGR2, SDC2, CCRL2, KCNQ5, SLC23A2,</p>                                                                                                                                                                                                                                                                                                                                                                                                                                                                                                                                                                                                                                                                                                                                                                                                                                                                                                                                                                                                                                                                       |

|                                             |          |                                                                                                                                                                                                                                                                                                                                                                                                                                                                                                                                                                                                                                                                                                                                                                                                                                                                                             |
|---------------------------------------------|----------|---------------------------------------------------------------------------------------------------------------------------------------------------------------------------------------------------------------------------------------------------------------------------------------------------------------------------------------------------------------------------------------------------------------------------------------------------------------------------------------------------------------------------------------------------------------------------------------------------------------------------------------------------------------------------------------------------------------------------------------------------------------------------------------------------------------------------------------------------------------------------------------------|
|                                             |          | GPC6, CEACAM6, CEACAM5, SLC43A1, CEACAM1, KCNG1, CSF2RA, KCNMA1, GPR176, PCDH7, MMP14, UGT1A1, CHRM3, CD82, TM4SF4, CALCR, PARD3, NPY2R, GPR64, C5, GPRC5A, UGT1A6, HRH1, UGT1A4, CD22, FUT1, PLA2R1, PTPRB, FLRT2, IL6, SLC12A2, NOX1, TSPAN13, KCNN4, SLC16A2, SLC17A3, SLC16A7, SLC17A1, BMPR1B                                                                                                                                                                                                                                                                                                                                                                                                                                                                                                                                                                                          |
| GO:0005887~integral to plasma membrane      | 2.66E-08 | KLRC2, GRIK2, TNFSF15, TSPAN7, TNFSF13, ENPEP, IL15, VIPR1, SLC7A7, S1PR3, AGTR1, CD44, KCNK5, CHRNA7, SLC4A4, HTR1D, SLC4A3, EFNB2, PTPRO, CCR7, THBD, RHCG, MST1R, VAMP1, CAV2, FXD2, FGFR4, DRD1, ADORA2B, ERBB3, ITGA11, ITGB4, CD70, BDKRB2, ABCA1, KCNJ2, ABCA4, ITGBL1, P2RY6, ITGB8, FOLR1, ADRA2A, B3GNT3, SLC30A3, PCDHA13, MUC1, HCN2, ADAM23, PODXL, SYT11, SLC6A14, SLC6A17, KCNK1, KCNK3, EPHA2, SYNGR3, NTRK3, EPHA4, EPHA7, TNFSF10, KCNJ6, GPR37, EPS8, SLC7A2, SLC13A2, TGFBR3, MERTK, SCARA5, ADRA1D, KCNH1, CLDN4, TACR1, SORL1, BCAM, SYNGR2, SDC2, CCRL2, KCNQ5, SLC23A2, GPC6, CEACAM6, CEACAM5, SLC43A1, CEACAM1, KCNG1, CSF2RA, KCNMA1, GPR176, PCDH7, MMP14, UGT1A1, CHRM3, CD82, TM4SF4, CALCR, NPY2R, GPR64, C5, GPRC5A, UGT1A6, HRH1, UGT1A4, CD22, FUT1, PLA2R1, PTPRB, FLRT2, IL6, SLC12A2, NOX1, TSPAN13, KCNN4, SLC16A2, SLC17A3, SLC16A7, SLC17A1, BMPR1B |
| GO:0042127~regulation of cell proliferation | 1.38E-07 | DLC1, NAMPT, RARRES3, MARCKSL1, STAT5A, E2F7, TACR1, TNFSF15, TP63, TNFSF13, PRRX2, IL15, VIPR1, SHH, IL11, AGTR1, S1PR3, WISP2, BDNF, PTGES, CDKN2C, APOE, HLX, HMOX1, SERPINE1, DLG3, CHRNA7, RARB, IL1A, CDC6, HYAL1, IRS2, MECOM, VEGFC, HNF4A, ADM, SCIN, ADAMTS1, MST1R, TBX18, SMARCA2, TM4SF4, FGFR2, CAV2, FRK, RBP4, FGFR4, CCL2, CXCL5, ERBB3, SOX2, SOX4, SFN, BDKRB2, SOX9, AGT, BCL2, ADRA2A, TGM2, KRT4, EGF, RUNX2, FGFBP1, SCG2, KLF5, COL4A3, IL6, TP53I11, CRIP2, NOX1, IGF2, FOXP2, RERG, NUPR1, CD274, TGFBR3, MUC5AC, NR5A2, BMP7, ADRA1D                                                                                                                                                                                                                                                                                                                             |
| GO:0009725~response to hormone stimulus     | 1.58E-07 | ADCY1, TACR1, STAT5A, PDE3B, VGF, SHH, HMOX1, ANGPT1, LOX, MB, KCNMA1, IRS2, GATM, CRYAB, BAIAP2, PRKCI, MMP14, UGT1A1, TAT, KRT19, ADM, COL1A1, CA2, CALCR, RBP4, CAV2, DRD1, HMGB2, CCL2, ERBB3, CPN1, PHIP, UGT1A6, BCHE, BCL2, UGT1A4, TFF3, TFF1, PIK3R3, NEFL, IL6, IGF2, NR4A3, CPS1, HDAC5, RERG, TGFBR3, IGFBP1, BMP7                                                                                                                                                                                                                                                                                                                                                                                                                                                                                                                                                              |
| GO:0009611~response to wounding             | 1.97E-07 | TACR1, IL15, SHH, IL11, S1PR3, CD44, HMOX1, SERPINE1, CFH, LOX, CFD, TFPI2, IL1A, F11R, GATM, CHST2, F7, MECOM, PLAUR, CCR7, THBD, ADM, F5, HNF4A, SERPINF2, F2, PLLP, CTSB, TM4SF4, TF, CCL2, ERBB3, C3, CXCL3, C5,                                                                                                                                                                                                                                                                                                                                                                                                                                                                                                                                                                                                                                                                        |

|                                                 |          |                                                                                                                                                                                                                                                                                                                                                                                                                                                                                                                                                                                                                                                 |
|-------------------------------------------------|----------|-------------------------------------------------------------------------------------------------------------------------------------------------------------------------------------------------------------------------------------------------------------------------------------------------------------------------------------------------------------------------------------------------------------------------------------------------------------------------------------------------------------------------------------------------------------------------------------------------------------------------------------------------|
|                                                 |          | HOXB13, BDKRB2, HRH1, FGG, FGB, BCL2, NEFL, ENTPD2, PAPSS2, SCG2, IL6, NOX1, C4BPB, IGF2, C4BPA, COL5A1, HDAC5, APOL2, PLSCR4, NUPR1, FBLN5, IGFBP1, ALOX5, BMPR1B, IGFBP4                                                                                                                                                                                                                                                                                                                                                                                                                                                                      |
| GO:0005509~calcium ion binding                  | 7.31E-07 | S100A4, PDP1, PXDN, STAT5A, NPNT, SNCA, SYT6, ENPEP, EDIL3, MMP28, CALB2, PLCB4, PLS1, ANO9, KCNMA1, NRXN2, NCALD, CACNG7, VIL1, PADI2, PCDH9, PCDH7, F7, MAN1A1, MMP14, PLCE1, NPTXR, THBD, F5, RASGRF2, DLL4, SCIN, F2, GALNT9, GALNT1, GALNT7, GALNT5, GALNT4, ITGA11, SPOCK1, PCDHGC3, EDEM3, EFCAB4B, PKD1L2, PLCL2, ANXA6, DGKA, CDH7, FGG, NPTX1, PRRG4, LPCAT1, ENTPD7, RASGRP2, PLCH1, PRSS3, TGM2, HEG1, EGF, PCDHA13, ENTPD2, DTNA, SCG2, CACNA2D1, SVEP1, S100A16, TRPC6, CAPN8, SYT11, MRC2, FBN1, EFEMP1, PCDH10, S100A10, NID1, GAS6, CDH15, DSG2, PLSCR4, CDH17, ATP2A3, FLG, FBLN5, PLCG2, CACNA1G, DSC2, ANXA13, ALOX5, CDH10 |
| GO:0008283~cell proliferation                   | 1.68E-06 | E2F1, STIL, INSL4, E2F8, TP63, TNFSF14, ZEB2, IL15, ENPEP, FES, SHH, HMOX1, TGFBI, IL1A, CYR61, IRS2, TPX2, MMP14, VEGFC, PLCE1, UHRF1, CCND3, CHRM3, FOXC1, EMP1, RBP4, SPOCK1, EHF, CD70, SFN, ACE, BCL2, AGT, HELLS, GINS1, COL4A3, CRIP1, MKI67, TNFSF9, APPL2, GAS6, CDC25A, EPS8, CD274, PCNA, TGFBR3, TCF19, AREG, ADRA1D, IGFBP4                                                                                                                                                                                                                                                                                                        |
| GO:0001655~urogenital system development        | 2.18E-06 | RBP4, ARID5B, FBN1, TP63, HOXB13, NID1, GREM1, SHH, AGTR1, PLCE1, BDNF, ACE, CD44, AGT, BCL2, FOXC1, ADAMTS1, RARB, CA2, BMP7, HELLS                                                                                                                                                                                                                                                                                                                                                                                                                                                                                                            |
| GO:0009719~response to endogenous stimulus      | 2.60E-06 | ADCY1, TACR1, STAT5A, PDE3B, VGF, SHH, HMOX1, ANGPT1, LOX, MB, KCNMA1, IRS2, GATM, CRYAB, BAIAP2, PRKCI, MMP14, UGT1A1, TAT, KRT19, ADM, COL1A1, CA2, CALCR, RBP4, CAV2, DRD1, HMGB2, CCL2, ERBB3, CPN1, PHIP, UGT1A6, BCHE, BCL2, UGT1A4, TFF3, TFF1, PIK3R3, NEFL, IL6, IGF2, NR4A3, CPS1, HDAC5, RERG, TGFBR3, IGFBP1, BMP7                                                                                                                                                                                                                                                                                                                  |
| GO:0043434~response to peptide hormone stimulus | 3.81E-06 | RBP4, CAV2, DRD1, ERBB3, STAT5A, PDE3B, VGF, PHIP, BCL2, TFF3, TFF1, PIK3R3, NEFL, IRS2, GATM, BAIAP2, PRKCI, IGF2, NR4A3, CPS1, HDAC5, ADM, COL1A1, IGFBP1, BMP7                                                                                                                                                                                                                                                                                                                                                                                                                                                                               |
| GO:0007155~cell adhesion                        | 6.77E-06 | DLC1, NRP2, MPZL3, CLDN4, NPNT, BCAM, EDIL3, WISP2, CD44, TGFBI, COL12A1, LOXL2, CEACAM1, CYR61, F11R, NRXN2, PCDH9, PCDH7, SIRPA, CTNNA2, F5, CNTN1, LAMC2, PARD3, CCL2, ITGB4, ITGA11, CTNND2, SPOCK1, PCDHGC3, CX3CL1, SOX9, ITGBL1, IGSF11, CDH7, LAMB3, COL7A1, ITGB8, PVRL3, BCL2, AGT, MSLN, CD22, PCDHA13, COL4A3, FLRT2, SVEP1, GMDS, LPP, ADAM23, PCDH10, PPFIBP1, NID1, SLAMF7, COL5A1, CDH15, COL14A1, LAMA3, DSG2, NLGN4Y, CDH17, PKP2, FBLN5, DSC2, FCGBP,                                                                                                                                                                        |

|                                                      |          |                                                                                                                                                                                                                                                                                                                                                                                                                                                                                                                                                                                                                                                                                                                                     |
|------------------------------------------------------|----------|-------------------------------------------------------------------------------------------------------------------------------------------------------------------------------------------------------------------------------------------------------------------------------------------------------------------------------------------------------------------------------------------------------------------------------------------------------------------------------------------------------------------------------------------------------------------------------------------------------------------------------------------------------------------------------------------------------------------------------------|
|                                                      |          | MUC5AC, BMPR1B, CDH10                                                                                                                                                                                                                                                                                                                                                                                                                                                                                                                                                                                                                                                                                                               |
| GO:0022610~biological adhesion                       | 7.13E-06 | DLC1, NRP2, MPZL3, CLDN4, NPNT, BCAM, EDIL3, WISP2, CD44, TGFBI, COL12A1, LOXL2, CEACAM1, CYR61, F11R, NRXN2, PCDH9, PCDH7, SIRPA, CTNNA2, F5, CNTN1, LAMC2, PARD3, CCL2, ITGB4, ITGA11, CTNND2, SPOCK1, PCDHGC3, CX3CL1, SOX9, ITGBL1, IGSF11, CDH7, LAMB3, COL7A1, ITGB8, PVRL3, BCL2, AGT, MSLN, CD22, PCDHA13, COL4A3, FLRT2, SVEP1, GMDS, LPP, ADAM23, PCDH10, PPFIBP1, NID1, SLAMF7, COL5A1, CDH15, COL14A1, LAMA3, DSG2, NLGN4Y, CDH17, PKP2, FBLN5, DSC2, FCGBP, MUC5AC, BMPR1B, CDH10                                                                                                                                                                                                                                      |
| GO:0008285~negative regulation of cell proliferation | 9.18E-06 | DLC1, CAV2, RARRES3, RBP4, FRK, E2F7, TNFSF15, IL15, BDKRB2, SFN, SHH, WISP2, BDNF, PTGES, APOE, CDKN2C, HMOX1, BCL2, AGT, DLG3, KRT4, RARB, FGFBP1, IL1A, SCG2, CDC6, HYAL1, COL4A3, TP53I11, IL6, RERG, NUPR1, HNF4A, ADM, CD274, SCIN, TGFBR3, ADAMTS1, MUC5AC, BMP7, SMARCA2, TM4SF4                                                                                                                                                                                                                                                                                                                                                                                                                                            |
| GO:0000267~cell fraction                             | 1.23E-05 | CYP3A5, GRIK2, PDLIM5, SNCA, PDE3B, IL15, STAC, ANK3, SERPINE1, RAPGEF4, SLC4A3, CRYAB, FA2H, POR, AADAC, PLCE1, VAMP8, ARRB1, F2, LAMC2, CPD, VAMP1, LRRK2, EMP1, CAV2, DRD1, CYP1B1, OAS3, CD70, OAS1, ABCA1, ABCA4, PPP1R3C, ACE, FGB, FOLR1, BCHE, PLCH1, SLC30A3, PCDHA13, EGF, CAMK2N1, DOCK3, TNFSF10, EPS8, SLC7A2, PLCG2, MAP2, SLC13A2, MERTK, NRP2, INSL4, TP63, TSPAN12, WISP2, CYP39A1, PTGES, SLC23A2, HMOX1, GPX3, NT5E, CEACAM1, SPINT1, MAN1A1, UGT1A1, DGAT2, ADM, TPPP, CNTN1, CTSB, UGT2B15, TM4SF4, PCDHGC3, TAC3, UGT1A6, ACSL1, BCL2, AGT, RASGRP2, UGT1A4, FUT1, DTNA, SLC12A2, FADS3, TSPAN13, PDE3A, NPR3, CYP4F12, SLC17A7, SLC16A2, CYP4F8, SLC16A7, SLC17A3, NTS, SLC17A1, FBLN5, CYP4F3, ALOX5, DUSP6 |
| GO:0008081~phosphoric diester hydrolase activity     | 1.73E-05 | PDE11A, PDE3B, GDPD5, PDE3A, PDE10A, BDKRB2, PLCL2, PLCE1, PLCB4, CHRM3, PDE2A, PDE1C, HMOX1, PLCH1, PDE1A, PLCG2, PDE9A                                                                                                                                                                                                                                                                                                                                                                                                                                                                                                                                                                                                            |
| GO:0005578~proteinaceous extracellular matrix        | 1.86E-05 | TF, NPNT, ADAMTS15, SPOCK1, MMP28, LAMB3, WNT4, COL7A1, GPC6, TGFBI, TFF3, COL12A1, ADAMTS12, LOX, WNT6, VWA1, TFPI2, ENTPD2, ANGPTL4, FLRT2, COL4A3, MATN3, FBN1, EFEMP1, NID1, MMP14, ECM1, COL5A2, COL5A1, LAMA3, COL14A1, FBLN5, KAZALD1, PI3, ADAMTS1, LAMC2, MUC5AC, COL1A1, MFAP5                                                                                                                                                                                                                                                                                                                                                                                                                                            |
| GO:0042060~wound healing                             | 1.88E-05 | ERBB3, SHH, IL11, FGG, CD44, FGB, HMOX1, SERPINE1, LOX, TFPI2, PAPSS2, ENTPD2, IL6, GATM, C4BPB, IGF2, F7, COL5A1, PLAUR, THBD, F5, HNF4A, PLSCR4, FBLN5, F2, IGFBP1, TM4SF4                                                                                                                                                                                                                                                                                                                                                                                                                                                                                                                                                        |
| GO:0031012~extracellular matrix                      | 1.98E-05 | TF, NPNT, ADAMTS15, SPOCK1, MMP28, LAMB3, WNT4, CD44, COL7A1, GPC6, TGFBI, TFF3, COL12A1, ADAMTS12, LOX, WNT6, VWA1, TFPI2,                                                                                                                                                                                                                                                                                                                                                                                                                                                                                                                                                                                                         |

|                                                                 |          |                                                                                                                                                                                                                                                                                                                                                                                                                                                                        |
|-----------------------------------------------------------------|----------|------------------------------------------------------------------------------------------------------------------------------------------------------------------------------------------------------------------------------------------------------------------------------------------------------------------------------------------------------------------------------------------------------------------------------------------------------------------------|
|                                                                 |          | ENTPD2, ANGPTL4, FLRT2, COL4A3, MATN3, FBN1, EFEMP1, NID1, MMP14, COL5A2, ECM1, COL5A1, LAMA3, COL14A1, FBLN5, KAZALD1, PI3, ADAMTS1, LAMC2, MUC5AC, COL1A1, BMP7, MFAP5                                                                                                                                                                                                                                                                                               |
| GO:0046545~development of primary female sexual characteristics | 2.00E-05 | RBP4, STAT5A, TP63, VGF, MMP14, INHBB, WNT4, BCL2, AGT, ANGPT1, FOXC1, ADAMTS1, LHX8, BMPR1B, LFNG                                                                                                                                                                                                                                                                                                                                                                     |
| GO:0046660~female sex differentiation                           | 2.00E-05 | RBP4, STAT5A, TP63, VGF, MMP14, INHBB, WNT4, BCL2, AGT, ANGPT1, FOXC1, ADAMTS1, LHX8, BMPR1B, LFNG                                                                                                                                                                                                                                                                                                                                                                     |
| GO:0045137~development of primary sexual characteristics        | 2.06E-05 | RBP4, HMGB2, STAT5A, SOX2, TP63, VGF, MMP14, SOX9, SYCP2, SHH, GJB2, INHBB, WNT4, AGT, BCL2, ADAMTS1, ANGPT1, FOXC1, BMPR1B, LHX8, LFNG                                                                                                                                                                                                                                                                                                                                |
| GO:0032101~regulation of response to external stimulus          | 2.11E-05 | DRD1, IL6, CCK, ADORA2B, C3, STAT5A, IGF2, TSPAN8, CX3CL1, F7, GREM1, CTNNA2, NTRK3, GPX2, AGTR1, APOE, SERPINF2, AGT, F2, SERPINE1, TGM2, CHRNA7, NT5E, SCG2                                                                                                                                                                                                                                                                                                          |
| GO:0001944~vasculature development                              | 2.25E-05 | NRP2, TNFSF13, PRRX2, ENPEP, SHH, TYMP, ACE, CD44, HEY1, APOE, HMOX1, AGT, TGM2, ANGPT1, LOX, SOX17, EGF, CEACAM1, SCG2, CYR61, ANGPTL4, KLF5, EFN2, NOX1, MMP14, COL5A1, VEGFC, ID1, DLL4, TGFB3, FOXC1, COL1A1                                                                                                                                                                                                                                                       |
| GO:0010033~response to organic substance                        | 3.32E-05 | ADCY1, STAT5A, TACR1, SNCA, PDE3B, VGF, SHH, CD44, APOE, HMOX1, CREB3L1, ANGPT1, CHRNA7, LOX, MB, CYR61, KCNMA1, IRS2, GATM, CRYAB, BAIAP2, PRKCI, MMP14, TAT, UGT1A1, KRT19, THBD, ADM, HNF4A, SERPINF2, COL1A1, CA2, CALCR, CAV2, TF, RBP4, DRD1, HMGB2, CYP1B1, CCL2, ERBB3, EDEM3, CPN1, PHIP, UGT1A6, ACSL1, PLIN2, BCHE, BCL2, UGT1A4, TFF3, TFF1, PIK3R3, NEFL, COL4A3, IL6, PDE3A, IGF2, NR4A3, CPS1, RERG, HDAC5, EPS8, ID1, PLCG2, TGFB3, IGFBP1, BMP7, TJP2 |
| GO:0001568~blood vessel development                             | 3.57E-05 | NRP2, TNFSF13, PRRX2, ENPEP, SHH, TYMP, ACE, CD44, HEY1, APOE, HMOX1, AGT, TGM2, ANGPT1, LOX, SOX17, EGF, CEACAM1, SCG2, CYR61, ANGPTL4, KLF5, NOX1, MMP14, COL5A1, VEGFC, ID1, DLL4, TGFB3, FOXC1, COL1A1                                                                                                                                                                                                                                                             |
| GO:0044420~extracellular matrix part                            | 3.89E-05 | COL4A3, TF, FBN1, NID1, COL5A2, COL5A1, LAMB3, LAMA3, COL14A1, COL7A1, COL12A1, TFF3, LAMC2, ADAMTS1, MUC5AC, COL1A1, LOX, VWA1, MFAP5, ENTPD2                                                                                                                                                                                                                                                                                                                         |
| GO:0007596~blood coagulation                                    | 4.04E-05 | IL6, C4BPB, F7, SHH, IL11, PLAUR, FGG, THBD, PLSCR4, HNF4A, F5, FGB, FBLN5, SERPINE1, F2, TFPI2, ENTPD2, PAPSS2                                                                                                                                                                                                                                                                                                                                                        |
| GO:0050817~coagulation                                          | 4.04E-05 | IL6, C4BPB, F7, SHH, IL11, PLAUR, FGG, THBD, PLSCR4, HNF4A, F5, FGB, FBLN5, SERPINE1, F2, TFPI2, ENTPD2, PAPSS2                                                                                                                                                                                                                                                                                                                                                        |
| GO:0005624~membrane fraction                                    | 4.87E-05 | NRP2, CYP3A5, GRIK2, PDLIM5, SNCA, PDE3B, TP63, IL15, TSPAN12, CYP39A1, PTGES, ANK3, SLC23A2, HMOX1, RAPGEF4, SLC4A3, NT5E, CEACAM1, FA2H, SPINT1, MAN1A1, UGT1A1, POR,                                                                                                                                                                                                                                                                                                |

|                                       |          |                                                                                                                                                                                                                                                                                                                                                                                                                                                                                                                                                                                                      |
|---------------------------------------|----------|------------------------------------------------------------------------------------------------------------------------------------------------------------------------------------------------------------------------------------------------------------------------------------------------------------------------------------------------------------------------------------------------------------------------------------------------------------------------------------------------------------------------------------------------------------------------------------------------------|
|                                       |          | AADAC, PLCE1, DGAT2, ARRB1, VAMP8, CNTN1, LAMC2, CPD, UGT2B15, LRRK2, VAMP1, TM4SF4, EMP1, CAV2, DRD1, CYP1B1, OAS3, OAS1, CD70, PCDHGC3, ABCA1, ABCA4, UGT1A6, ACE, PPP1R3C, ACSL1, BCHE, FOLR1, BCL2, UGT1A4, RASGRP2, PLCH1, FUT1, SLC30A3, PCDHA13, DTNA, SLC12A2, FADS3, TSPAN13, CYP4F12, NPR3, CAMK2N1, SLC17A7, CYP4F8, SLC16A2, SLC16A7, SLC17A3, EPS8, SLC7A2, SLC17A1, MAP2, PLCG2, SLC13A2, CYP4F3                                                                                                                                                                                       |
| GO:0005626~insoluble fraction         | 5.35E-05 | NRP2, CYP3A5, GRIK2, PDLIM5, SNCA, PDE3B, TP63, IL15, TSPAN12, CYP39A1, PTGES, ANK3, SLC23A2, HMOX1, RAPGEF4, SLC4A3, NT5E, CEACAM1, CRYAB, FA2H, SPINT1, MAN1A1, UGT1A1, POR, AADAC, PLCE1, DGAT2, ARRB1, VAMP8, CNTN1, LAMC2, CPD, UGT2B15, LRRK2, VAMP1, TM4SF4, EMP1, CAV2, DRD1, CYP1B1, OAS3, OAS1, CD70, PCDHGC3, ABCA1, ABCA4, UGT1A6, ACE, PPP1R3C, ACSL1, BCHE, FOLR1, BCL2, UGT1A4, RASGRP2, PLCH1, FUT1, SLC30A3, PCDHA13, DTNA, SLC12A2, FADS3, TSPAN13, PDE3A, CYP4F12, NPR3, CAMK2N1, SLC17A7, CYP4F8, SLC16A2, SLC16A7, SLC17A3, EPS8, SLC7A2, SLC17A1, MAP2, PLCG2, SLC13A2, CYP4F3 |
| GO:0048878~chemical homeostasis       | 6.31E-05 | GRIK2, TACR1, SNCA, SLC9A2, PDE3B, VGF, CKB, AGTR1, S1PR3, MALL, APOE, BHLHA15, HMOX1, SERPINE1, CHRNA7, KCNMA1, IRS2, PPARGC1A, PLCE1, CCR7, ADM, HNF4A, RHCG, F2, NAB1, SLC26A9, PLLP, CALCR, TF, RBP4, DRD1, CCK, CCL2, EGLN1, ABCA1, BDKRB2, AGT, BCL2, TGM2, HCN2, TRPC6, NOX1, IGF2, CPS1, TMPRSS3, HPX, PLCG2, MT2A, CACNA1G, NR5A2, SCARA5                                                                                                                                                                                                                                                   |
| GO:0042312~regulation of vasodilation | 6.32E-05 | KCNMA1, AGTR1, ACE, NOS1, ADM, HMOX1, IGF2, CPS1                                                                                                                                                                                                                                                                                                                                                                                                                                                                                                                                                     |
| GO:0042592~homeostatic process        | 6.44E-05 | GRIK2, STAT5A, TACR1, SLC9A2, SNCA, TNFSF14, PDE3B, VGF, CKB, GPX2, AGTR1, S1PR3, MALL, APOE, BHLHA15, HMOX1, SERPINE1, CHRNA7, IL1A, MB, KCNMA1, IRS2, MECOM, PPARGC1A, MUC3A, PLCE1, CCR7, ADM, HNF4A, RHCG, RPS17, F2, NAB1, SLC26A9, PLLP, CALCR, TF, RBP4, DRD1, PARD3, CCL2, CCK, EGLN1, ABCA1, BDKRB2, AGT, BCL2, TGM2, TFF1, GLRX, HCN2, IL6, SLC12A2, TRPC6, NOX1, IGF2, CPS1, TMPRSS3, KCNN4, LARGE, NXN, HPX, MT2A, PLCG2, CACNA1G, TGFBR3, NR5A2, SCARA5                                                                                                                                 |
| GO:0001822~kidney development         | 6.76E-05 | ARID5B, FBN1, NID1, GREM1, SHH, AGTR1, PLCE1, BDNF, ACE, CD44, BCL2, AGT, FOXC1, ADAMTS1, RARB, CA2, BMP7                                                                                                                                                                                                                                                                                                                                                                                                                                                                                            |
| GO:0016324~apical plasma membrane     | 7.57E-05 | KCNMA1, MUC1, CAV2, PARD3, MYO1A, SHROOM3, SLC12A2, ERBB3, GPR64, PRKCI, ENPEP, EPCAM, ANXA6, P2RY6, MUC3A, RHCG, CD44, SLC23A2, SLC26A9, CTSB, ATP6V0D2                                                                                                                                                                                                                                                                                                                                                                                                                                             |
| GO:0007599~hemostasis                 | 8.50E-05 | IL6, C4BPB, F7, SHH, IL11, PLAUR, FGG, THBD,                                                                                                                                                                                                                                                                                                                                                                                                                                                                                                                                                         |



|                                                                             |          |                                                                                                                                                                                                                                                                                                  |
|-----------------------------------------------------------------------------|----------|--------------------------------------------------------------------------------------------------------------------------------------------------------------------------------------------------------------------------------------------------------------------------------------------------|
|                                                                             |          | PLSCR4, HNF4A, F5, FGB, FBLN5, SERPINE1, F2, TFPI2, ENTPD2, PAPSS2                                                                                                                                                                                                                               |
| GO:0007548~sex differentiation                                              | 8.56E-05 | RBP4, HMGB2, STAT5A, SOX2, TP63, VGF, MMP14, SOX9, SYCP2, CDKL2, SHH, GJB2, INHBB, WNT4, AGT, BCL2, ADAMTS1, ANGPT1, FOXC1, BMPR1B, LHX8, LFNG                                                                                                                                                   |
| GO:0050878~regulation of body fluid levels                                  | 9.49E-05 | KCNMA1, IL6, C4BPB, F7, SHH, IL11, PLAUR, KCNN4, FGG, THBD, PLSCR4, F5, HNF4A, FGB, FBLN5, F2, SERPINE1, GUCA2B, TFPI2, ENTPD2, PAPSS2                                                                                                                                                           |
| GO:0016323~basolateral plasma membrane                                      | 1.13E-04 | DLC1, TF, CAV2, LIMA1, LIMS2, ERBB3, NPY2R, ITGB4, APBB1IP, AQP3, EPCAM, P2RY6, CD44, SLC23A2, ANK3, CEACAM5, DIXDC1, MYO1A, SLC12A2, LPP, CTNNA2, TNS4, LAMA3, RHCG, CDH17, MAP7, CA2                                                                                                           |
| GO:0007169~transmembrane receptor protein tyrosine kinase signaling pathway | 1.13E-04 | FGFR2, FGFR4, NRTN, CCL2, ERBB3, GRIK2, STAT5A, BDKRB2, PHIP, ANGPT1, EGF, PIK3R3, IRS2, BAIAP2, ARID5B, IGF2, EPHA2, NTRK3, VEGFC, EPHA4, PLCE1, EPHA7, EPS8, DOK5, FOXC1, IGFBP1, AREG, MST1R                                                                                                  |
| GO:0007586~digestion                                                        | 1.29E-04 | KCNMA1, RBP4, VIPR1, PPARGC1A, UGT1A1, KCNN4, UGT1A6, ACE, MUC3A, CYP39A1, ACSL1, BAAT, CHRM3, UGT1A4, PRSS3, TFF3, MUC5AC, TFF1                                                                                                                                                                 |
| GO:0060429~epithelium development                                           | 1.42E-04 | DLC1, SHROOM3, ONECUT1, ONECUT2, TP63, HOXB13, EHF, ZEB2, SFN, GREM1, SHH, WNT4, CD44, AGT, BCL2, UPK1B, KRT4, F11R, MECOM, SCEL, VEGFC, LAMA3, RHCG, FLG, CA2, BMP7, TBX18, EMP1                                                                                                                |
| GO:0040012~regulation of locomotion                                         | 1.53E-04 | DLC1, DRD1, ONECUT1, TACR1, SNCA, ONECUT2, GREM1, SHH, ACE, APOE, AGT, BCL2, HMOX1, UNC5C, SCG2, IL6, IRS2, IGF2, F7, HDAC5, VEGFC, LAMA3, DLL4, TGFB3, MUC5AC                                                                                                                                   |
| GO:0048545~response to steroid hormone stimulus                             | 1.53E-04 | CALCR, CAV2, HMGB2, CCL2, SHH, CPN1, UGT1A6, BCHE, HMOX1, BCL2, UGT1A4, ANGPT1, LOX, TFF1, NEFL, KCNMA1, IL6, CRYAB, CPS1, MMP14, TAT, UGT1A1, KRT19, ADM, COL1A1, CA2, BMP7                                                                                                                     |
| GO:0004857~enzyme inhibitor activity                                        | 1.54E-04 | CAST, PPP1R14D, C3, LXN, SNCA, C5, PRKAG2, APOC1, TNFSF14, SFN, COL7A1, PPP1R1C, CDKN2C, AGT, SERPINE1, ITIH5, PPP1R14C, TFPI2, ANGPTL4, RHOH, COL4A3, PHACTR2, CST2, SPINT1, CST1, PKIB, CAMK2N1, RENBP, SERPINF2, ARRB1, PI3, SLPI                                                             |
| GO:0030334~regulation of cell migration                                     | 1.58E-04 | DLC1, DRD1, IRS2, IL6, ONECUT1, TACR1, ONECUT2, IGF2, F7, GREM1, SHH, HDAC5, VEGFC, ACE, LAMA3, APOE, HMOX1, AGT, DLL4, BCL2, TGFB3, MUC5AC, UNC5C                                                                                                                                               |
| GO:0007242~intracellular signaling cascade                                  | 1.62E-04 | CYP24A1, ADCY1, NRTN, STAT5A, TNFSF15, TNFSF14, VIPR1, RGL1, S1PR3, AGTR1, DIRAS2, STAC, APOE, BHLHA15, CHRNA7, RAPGEF4, HTR1D, RAB27B, DDAH1, NET1, DEPDC7, MAGI3, CRYAB, DCDC2, PPARGC1A, DCDC1, LAT2, PLCE1, RND1, RASGRF2, ZWINT, F2, LRRK2, ASB4, DRD1, HMGB2, CCL2, ADORA2B, ERBB3, ABCA1, |

|                                                               |          |                                                                                                                                                                                                                                                                                                                                                                                                                              |
|---------------------------------------------------------------|----------|------------------------------------------------------------------------------------------------------------------------------------------------------------------------------------------------------------------------------------------------------------------------------------------------------------------------------------------------------------------------------------------------------------------------------|
|                                                               |          | RAB40B, CORO2A, P2RY6, PLCH1, ADRA2A, DYRK2, EGF, STK38L, FGD4, ARHGDIB, BRIP1, RERG, CDC42BPG, PLCG2, PCNA, TGFBR3, ADRA1D, TACR1, PRKAG2, TP63, RHOV, MCF2L, PLCB4, HMOX1, SHC2, RHOF, RHOH, CDK1, PRKCI, FMN2, ADM, DOK5, GADD45G, PDE9A, GADD45B, CALCR, RAB3B, PLEK2, NPY2R, C5, SFN, EFCAB4B, DGKA, PLCL2, HRH1, AGT, RASGRP2, TGM2, SH2B3, TNFRSF19, SCG2, NFATC1, BIRC7, IGF2, NPR3, MAPK10, NUPR1, JAK3, CIT, DUSP6 |
| GO:0008585~female gonad development                           | 1.72E-04 | STAT5A, VGF, MMP14, INHBB, WNT4, BCL2, AGT, ANGPT1, ADAMTS1, FOXC1, LHX8, BMPR1B, LFNG                                                                                                                                                                                                                                                                                                                                       |
| GO:0030198~extracellular matrix organization                  | 1.79E-04 | MPZL3, NID1, COL5A2, COL5A1, COL14A1, KAZALD1, FBLN5, AGT, TGFBI, FOXF2, COL12A1, FOXC1, MUC5AC, LOX, COL1A1, VWA1, CYR61                                                                                                                                                                                                                                                                                                    |
| GO:0001558~regulation of cell growth                          | 1.80E-04 | IGFBPL1, TP63, SFN, GREM1, AGTR1, WISP2, TSPYL2, CD44, CDKN2C, APOE, AGT, BCL2, RASGRP2, CDA, CYR61, NET1, CRYAB, IGF2, NTRK3, RERG, PLCE1, HNF4A, KAZALD1, IGFBP1, IGFBP4                                                                                                                                                                                                                                                   |
| GO:0048608~reproductive structure development                 | 1.91E-04 | RBP4, HMGB2, STAT5A, TP63, HOXB13, VGF, SOX9, MMP14, SHH, INHBB, WNT4, AGT, BCL2, ADAMTS1, ANGPT1, FOXC1, BMPR1B, LHX8, LFNG                                                                                                                                                                                                                                                                                                 |
| GO:0031667~response to nutrient levels                        | 2.27E-04 | RBP4, CYP24A1, CCK, CCL2, SOX2, SHH, AQP3, UGT1A6, ACSL1, CD44, BCHE, HMOX1, BCL2, UGT1A4, ANGPT1, MUC1, GATM, STC2, HRK, CPS1, PPARGC1A, UGT1A1, ADM, CTSD, COL1A1, ALOX5, BMP7                                                                                                                                                                                                                                             |
| GO:0048514~blood vessel morphogenesis                         | 2.62E-04 | NRP2, TNFSF13, PRRX2, ENPEP, SHH, TYMP, ACE, HEY1, APOE, HMOX1, AGT, TGM2, ANGPT1, SOX17, EGF, CEACAM1, CYR61, ANGPTL4, SCG2, KLF5, NOX1, MMP14, VEGFC, ID1, DLL4, FOXC1                                                                                                                                                                                                                                                     |
| GO:0007267~cell-cell signaling                                | 2.70E-04 | NAMPT, INSL4, GRIK2, SNCA, TP63, IL15, ENPEP, VGF, VIPR1, SHH, IL11, KCNQ5, WISP2, WNT4, BDNF, APOE, BHLHA15, CEACAM6, SEMA3B, RAPGEF4, WNT6, HTR1D, KCNMA1, GABRG3, GPR176, STC2, EFNB2, CTNNA2, ADM, CAV2, DRD1, FGFR4, CXCL5, SOX2, CD70, GREM1, NPTX1, HRH1, AGT, FGFBP1, DTNA, HCN2, IL6, NOS1, IGF2, PARK2, TNFSF9, KCNK3, GJB1, GJB2, SLC17A7, TNFSF10, AREG, MERTK, ADRA1D                                           |
| GO:0004114~3',5'-cyclic-nucleotide phosphodiesterase activity | 2.77E-04 | PDE2A, PDE1C, PDE1A, PDE3B, PDE11A, PDE9A, PDE10A, PDE3A                                                                                                                                                                                                                                                                                                                                                                     |
| GO:0004112~cyclic-nucleotide phosphodiesterase activity       | 3.67E-04 | PDE2A, PDE1C, PDE1A, PDE3B, PDE11A, PDE9A, PDE10A, PDE3A                                                                                                                                                                                                                                                                                                                                                                     |
| GO:0048762~mesenchymal cell differentiation                   | 4.07E-04 | NRP2, S100A4, NRTN, BCL2, TGFBR3, ZEB2, FOXC1, SOX9, BMP7, SHH, NFATC1                                                                                                                                                                                                                                                                                                                                                       |
| GO:0014031~mesenchymal cell development                       | 4.07E-04 | NRP2, S100A4, NRTN, BCL2, TGFBR3, ZEB2, FOXC1, SOX9, BMP7, SHH, NFATC1                                                                                                                                                                                                                                                                                                                                                       |
| GO:0051270~regulation of cell motion                          | 4.19E-04 | DLC1, PARD3, DRD1, IRS2, IL6, ONECUT1, TACR1, ONECUT2, IGF2, F7, GREM1, SHH, HDAC5, VEGFC, ACE, LAMA3, APOE, HMOX1, AGT, DLL4, BCL2, TGFBR3, MUC5AC, UNC5C                                                                                                                                                                                                                                                                   |

|                                                   |          |                                                                                                                                                                                                                 |
|---------------------------------------------------|----------|-----------------------------------------------------------------------------------------------------------------------------------------------------------------------------------------------------------------|
| GO:0060485~mesenchyme development                 | 4.79E-04 | NRP2, S100A4, NRTN, BCL2, TGFBR3, ZEB2, FOXC1, SOX9, BMP7, SHH, NFATC1                                                                                                                                          |
| GO:0035295~tube development                       | 4.95E-04 | DLC1, RBP4, CAV2, FGFR4, SHROOM3, TP63, HOXB13, ZEB2, GREM1, SHH, WNT4, BDNF, CD44, BCL2, AGT, LOX, RARB, EGF, TRAF4, SIM2, CYR61, NR4A3, MMP14, FOXP2, FOXC1, BMP7                                             |
| GO:0009991~response to extracellular stimulus     | 4.95E-04 | RBP4, CYP24A1, CCK, CCL2, ADORA2B, SOX2, SHH, AQP3, UGT1A6, ACSL1, CD44, BCHE, HMOX1, BCL2, UGT1A4, ANGPT1, MUC1, GATM, STC2, HRK, CPS1, PPARGC1A, UGT1A1, ADM, CTSD, COL1A1, ALOX5, BMP7                       |
| GO:0055080~cation homeostasis                     | 5.63E-04 | CALCR, TF, DRD1, CCL2, GRIK2, TACR1, SLC9A2, BDKRB2, S1PR3, AGTR1, APOE, HMOX1, AGT, BCL2, TGM2, CHRNA7, KCNMA1, TRPC6, NOX1, TMPRSS3, CCR7, PLCE1, RHCG, ADM, HPX, SLC26A9, F2, MT2A, PLCG2, CACNA1G, SCARA5   |
| GO:0019932~second-messenger-mediated signaling    | 5.82E-04 | CALCR, ADCY1, DRD1, HMGB2, CCL2, ADORA2B, NPY2R, TACR1, VIPR1, AGTR1, S1PR3, HRH1, P2RY6, APOE, BHLHA15, AGT, TGM2, RAPGEF4, HTR1D, NPR3, PLCE1, LAT2, ADM, ZWINT, PCNA, PDE9A, ADRA1D                          |
| GO:0051271~negative regulation of cell motion     | 6.04E-04 | DLC1, HDAC5, DRD1, PARD3, APOE, HMOX1, BCL2, DLL4, TGFBR3, MUC5AC, GREM1, SHH                                                                                                                                   |
| GO:0045765~regulation of angiogenesis             | 6.04E-04 | HDAC5, COL4A3, IL6, ADORA2B, ID1, HMOX1, SERPINE1, CHRNA7, TNFSF13, DDAH1, IL1A, ANGPTL4                                                                                                                        |
| GO:0045177~apical part of cell                    | 6.56E-04 | MUC1, KCNMA1, CAV2, PARD3, MYO1A, SHROOM3, SLC12A2, ERBB3, GPR64, PRKCI, ENPEP, EPCAM, ANXA6, P2RY6, MUC3A, RHCG, CD44, SLC23A2, SLC26A9, USH1C, CTSB, CA2, ATP6V0D2                                            |
| GO:0043062~extracellular structure organization   | 6.71E-04 | MPZL3, DNM3, DRD1, NID1, COL5A2, COL5A1, GPHN, COL14A1, ANK3, KAZALD1, FBLN5, AGT, TGFBI, FOXF2, COL12A1, FOXC1, MUC5AC, LOX, COL1A1, VWA1, CYR61                                                               |
| GO:0016477~cell migration                         | 6.74E-04 | NRP2, CAV2, DRD1, NRTN, CCK, CCL2, PLXNA2, CXCL3, ITGA11, TNFSF13, ZEB2, ENPEP, CX3CL1, SHH, CD44, PRSS3, CEACAM1, SCG2, IL6, ARID5B, PODXL, NOX1, DCDC2, MMP14, COL5A1, CTNNA2, VEGFC, ID1, TGFBR3, FOXC1      |
| GO:0048511~rhythmic process                       | 6.76E-04 | KCNMA1, PHLPP1, HLF, DDC, DRD1, ERBB3, STAT5A, VGF, MMP14, INHBB, AGT, BCL2, PER2, ANGPT1, FOXC1, ADAMTS1, BMPR1B, LFNG                                                                                         |
| GO:0001763~morphogenesis of a branching structure | 6.94E-04 | CTNND2, SPINT1, HOXB13, MMP14, GREM1, SHH, EPHA7, CD44, BCL2, AGT, EGF, BMP7, CYR61                                                                                                                             |
| GO:0007584~response to nutrient                   | 7.05E-04 | MUC1, RBP4, CYP24A1, CCL2, GATM, STC2, SOX2, UGT1A1, SHH, AQP3, UGT1A6, ACSL1, CD44, BCHE, HMOX1, BCL2, UGT1A4, ANGPT1, COL1A1, ALOX5, BMP7                                                                     |
| GO:0030054~cell junction                          | 7.81E-04 | DLC1, LIMA1, CLDN4, GRIK2, SYT6, CALB2, CD44, CHRNA7, GRID1, F11R, GABRG3, MAGI3, CTNNA2, TNS4, RND1, CHRM3, DOK7, VAMP1, ADD3, CGNL1, CAV2, PARD3, SHROOM3, LIMS2, NPY2R, CTNND2, APBB1IP, RIMS3, GPHN, PVRL3, |

|                                                         |             |                                                                                                                                                                                                                                                                                                                                                                                                                                                              |
|---------------------------------------------------------|-------------|--------------------------------------------------------------------------------------------------------------------------------------------------------------------------------------------------------------------------------------------------------------------------------------------------------------------------------------------------------------------------------------------------------------------------------------------------------------|
|                                                         |             | RASGRP2, SLC30A3, DTNA, GABRP, DIXDC1, LPP, SYT11, SYT12, GJB1, CAMK2N1, GJB2, SLC17A7, TMEM47, LAMA3, DSG2, PKP2, DSC2, TJP3, TJP2                                                                                                                                                                                                                                                                                                                          |
| GO:0051046~regulation of secretion                      | 7.96E-04    | RBP4, RAB3B, IL6, ADORA2B, ERBB3, TACR1, SNCA, TNFSF15, PDE3B, IGF2, KRT20, PARK2, IL11, INHBB, AGTR1, KCNN4, VEGFC, HMOX1, AGT, SCIN, RAPGEF4, EGF, RAB27B, IL1A                                                                                                                                                                                                                                                                                            |
| GO:0050727~regulation of inflammatory response          | 8.86E-04    | IL6, ADORA2B, C3, STAT5A, IGF2, CX3CL1, GPX2, AGTR1, APOE, AGT, TGM2, CHRNA7, NT5E                                                                                                                                                                                                                                                                                                                                                                           |
| GO:0033273~response to vitamin                          | 9.06E-04    | MUC1, RBP4, CYP24A1, CCL2, CD44, BCHE, BCL2, SOX2, ANGPT1, BMP7, AQP3, SHH                                                                                                                                                                                                                                                                                                                                                                                   |
| GO:0002526~acute inflammatory response                  | 9.56E-04    | TF, IL6, C3, TACR1, C5, C4BPB, IGF2, C4BPA, APOL2, NUPR1, SERPINF2, F2, CFH, CFD, IL1A                                                                                                                                                                                                                                                                                                                                                                       |
| GO:0010035~response to inorganic substance              | 9.75E-04    | KCNMA1, PXDN, S100A16, GATM, CRYAB, EEF1A2, SNCA, TAT, AQP3, MT1X, FGG, NPTXR, APOE, FGB, HMOX1, BCL2, GPX3, SERPINE1, PLCG2, CACNA1G, COL1A1, TFF1, CA2, MB                                                                                                                                                                                                                                                                                                 |
| GO:0043067~regulation of programmed cell death          | 9.77E-04    | DLC1, GRIK2, STAT5A, SNCA, TNFSF15, TNFSF14, TP63, TNFSF13, MCF2L, SHH, BDNF, CD44, BOK, CDKN2C, APOE, HMOX1, RARB, ALX4, IL1A, NET1, KCNMA1, CDK1, CRYAB, PRKCI, HRK, F7, RASGRF2, SCIN, F2, FOXC1, CTSB, LRRK2, PRODH, CCL2, CCK, ERBB3, SOX4, CD70, SFN, BDKRB2, SOX9, AGT, BCL2, TGM2, TNFRSF19, DYRK2, NEFL, BMF, TRAF4, HELLS, FGD4, SCG2, ANGPTL4, COL4A3, IL6, EEF1A2, BIRC7, IGF2, PDE3A, SLAMF7, BIRC3, EPHA7, TNFSF10, NUPR1, PLCG2, MUC5AC, BMP7 |
| GO:0006928~cell motion                                  | 9.80E-04    | NRP2, CAV2, NRTN, DRD1, CCK, CCL2, PLXNA2, CXCL3, ITGA11, SPOCK1, TNFSF13, ZEB2, ENPEP, CX3CL1, SHH, BDNF, CD44, ANK3, PRSS3, ADRA2A, SEMA3B, UNC5C, ROBO3, CEACAM1, SCG2, ARHGDIB, IL6, ARID5B, PODXL, NOX1, DCDC2, MMP14, COL5A1, PLAUR, CTNNA2, EPHA4, VEGFC, EPHA7, ID1, TGFBR3, FOXC1, MST1R, BMPR1B, BMP7                                                                                                                                              |
| GO:0046700~heterocycle catabolic process                | 9.98E-04    | ALDH1L1, PDE3B, UGT1A1, AMPD3, MOXD1, FRRS1, UGT1A6, HMOX1, UGT1A4, PRODH2, CDA, DPYD, ENTPD2, NT5E, PRODH                                                                                                                                                                                                                                                                                                                                                   |
| GO:0030336~negative regulation of cell migration        | 0.001019734 | DLC1, HDAC5, DRD1, APOE, HMOX1, BCL2, DLL4, TGFBR3, MUC5AC, GREM1, SHH                                                                                                                                                                                                                                                                                                                                                                                       |
| GO:0050729~positive regulation of inflammatory response | 0.001021761 | AGTR1, IL6, ADORA2B, C3, STAT5A, AGT, TGM2, CX3CL1                                                                                                                                                                                                                                                                                                                                                                                                           |
| GO:0010941~regulation of cell death                     | 0.001069339 | DLC1, GRIK2, STAT5A, SNCA, TNFSF15, TNFSF14, TP63, TNFSF13, MCF2L, SHH, BDNF, CD44, BOK, CDKN2C, APOE, HMOX1, RARB, ALX4, IL1A, NET1, KCNMA1, CDK1, CRYAB, PRKCI, HRK, F7, RASGRF2, SCIN, F2, FOXC1, CTSB, LRRK2, PRODH, CCL2, CCK, ERBB3, SOX4, CD70, SFN, BDKRB2, SOX9, AGT, BCL2, TGM2, TNFRSF19, DYRK2, NEFL, BMF, TRAF4, HELLS, FGD4, SCG2, ANGPTL4, COL4A3, IL6, EEF1A2, BIRC7, IGF2, PDE3A, SLAMF7, BIRC3, EPHA7, TNFSF10, NUPR1, PLCG2, MUC5AC, BMP7 |

|                                                             |             |                                                                                                                                                                                                                                                                                               |
|-------------------------------------------------------------|-------------|-----------------------------------------------------------------------------------------------------------------------------------------------------------------------------------------------------------------------------------------------------------------------------------------------|
| GO:0005201~extracellular matrix structural constituent      | 0.001093527 | MATN3, COL4A3, FBN1, COL5A2, COL5A1, WNT4, MUC3A, COL14A1, COL12A1, COL1A1, MUC5AC, WNT6, TFPI2, MFAP5                                                                                                                                                                                        |
| GO:0006954~inflammatory response                            | 0.001125141 | TF, CCL2, C3, CXCL3, TACR1, C5, IL15, BDKRB2, S1PR3, HRH1, CD44, HMOX1, CFH, CFD, IL1A, SCG2, F11R, IL6, NOX1, CHST2, IGF2, C4BPB, C4BPA, MECOM, HDAC5, APOL2, CCR7, NUPR1, SERPINF2, F2, ALOX5, BMPR1B, IGFBP4                                                                               |
| GO:0007010~cytoskeleton organization                        | 0.001140432 | DLC1, CAV2, TPPP3, LIMA1, SHROOM3, PDLIM7, PLEK2, ABLIM3, DIAPH3, KRT20, HOOK2, CDC42EP2, ANK3, APOE, BCL2, ADRA2A, KRT4, TUBA1B, NEFL, RHOF, FGD4, ARHGDIB, KIF11, CRYAB, VIL1, PRKCI, ESPL1, FMN2, PLCE1, CDC42BPG, KRT19, EPB41L1, RND1, EPS8, ZWINT, TPPP, MAP2, SCIN, SGCD, MAP7, TMSB4Y |
| GO:0003018~vascular process in circulatory system           | 0.00117233  | KCNMA1, CAV2, AGTR1, ADORA2B, NTS, APOE, AGT, CACNA1G, FOXC1, BDKRB2, ADRA1D                                                                                                                                                                                                                  |
| GO:0008406~gonad development                                | 0.001257547 | RBP4, HMGB2, STAT5A, VGF, SOX9, MMP14, INHBB, WNT4, BCL2, AGT, ANGPT1, FOXC1, ADAMTS1, LHX8, BMPR1B, LFNG                                                                                                                                                                                     |
| GO:0019216~regulation of lipid metabolic process            | 0.001257547 | KCNMA1, IRS2, STAT5A, PRKAG2, SNCA, RBL1, APOC1, PDE3B, IGF2, PPARGC1A, AGTR1, ACSL1, HNF4A, APOE, AGT, NR1H3                                                                                                                                                                                 |
| GO:0019217~regulation of fatty acid metabolic process       | 0.00128674  | IRS2, ACSL1, HNF4A, AGT, PRKAG2, SNCA, APOC1, IGF2, PPARGC1A, NR1H3                                                                                                                                                                                                                           |
| GO:0007167~enzyme linked receptor protein signaling pathway | 0.001309453 | FGFR2, NRTN, FGFR4, CCL2, ERBB3, GRIK2, USP9Y, STAT5A, BDKRB2, PHIP, ANGPT1, EGF, PIK3R3, IRS2, BAIAP2, ARID5B, IGF2, EPHA2, NTRK3, VEGFC, EPHA4, PLCE1, EPHA7, EPS8, ID1, DOK5, TGFBR3, FOXC1, MST1R, JAK3, IGFBP1, AREG, BMPR1B, BMP7                                                       |
| GO:0031099~regeneration                                     | 0.001324106 | CCL2, GATM, ADM, BCL2, SERPINE1, ANGPT1, IGFBP1, NR4A3, NEFL, GAS6, TM4SF4, PLAUR                                                                                                                                                                                                             |
| GO:0001525~angiogenesis                                     | 0.001352651 | KLF5, NRP2, NOX1, TNFSF13, ENPEP, MMP14, SHH, VEGFC, TYMP, ID1, HMOX1, DLL4, ANGPT1, SOX17, EGF, CEACAM1, CYR61, ANGPTL4, SCG2                                                                                                                                                                |
| GO:0030155~regulation of cell adhesion                      | 0.001458475 | ONECUT1, ERBB3, PODXL, STAT5A, ONECUT2, PDE3B, NID1, CX3CL1, EDIL3, MMP14, LAMA3, RND1, BCL2, TGFBI, TGM2, COL1A1, CYR61, ARHGDIB                                                                                                                                                             |
| GO:0003013~circulatory system process                       | 0.001469606 | KCNMA1, COL4A3, CAV2, ADORA2B, TACR1, NOX1, NPR3, BDKRB2, AGTR1, RENBP, ACE, F5, ADM, NTS, APOE, HMOX1, AGT, DLL4, CACNA1G, FOXC1, GUCA2B, ADRA1D                                                                                                                                             |
| GO:0008015~blood circulation                                | 0.001469606 | KCNMA1, COL4A3, CAV2, ADORA2B, TACR1, NOX1, NPR3, BDKRB2, AGTR1, RENBP, ACE, F5, ADM, NTS, APOE, HMOX1, AGT, DLL4, CACNA1G, FOXC1, GUCA2B, ADRA1D                                                                                                                                             |
| GO:0004866~endopeptidase inhibitor activity                 | 0.001474756 | CAST, COL4A3, LXN, C3, C5, SNCA, SPINT1, CST2, TNFSF14, CST1, RENBP, COL7A1, SERPINF2, AGT, SERPINE1, PI3, ITIH5, SLPI, TFPI2                                                                                                                                                                 |
| GO:0008284~positive regulation of cell proliferation        | 0.001482115 | FGFR2, NAMPT, FGFR4, CCL2, CXCL5, MARCKSL1, STAT5A, TACR1, SOX2, SOX4, TP63, TNFSF13, PRRX2, IL15, VIPR1, SHH, IL11, S1PR3, HLX, BCL2,                                                                                                                                                        |

|                                                                    |             |                                                                                                                                                                                                                                                                                                                                                                                                                                                |
|--------------------------------------------------------------------|-------------|------------------------------------------------------------------------------------------------------------------------------------------------------------------------------------------------------------------------------------------------------------------------------------------------------------------------------------------------------------------------------------------------------------------------------------------------|
|                                                                    |             | AGT, TGM2, ADRA2A, CHRNA7, EGF, RUNX2, SCG2, KLF5, IL6, IRS2, CRIP2, NOX1, IGF2, FOXP2, VEGFC, ADM, MST1R, TBX18, ADRA1D                                                                                                                                                                                                                                                                                                                       |
| GO:0040013~negative regulation of locomotion                       | 0.001745228 | DLC1, HDAC5, DRD1, APOE, HMOX1, BCL2, DLL4, TGFB3, MUC5AC, GREM1, SHH                                                                                                                                                                                                                                                                                                                                                                          |
| GO:0002053~positive regulation of mesenchymal cell proliferation   | 0.001807188 | IRS2, TP63, PRRX2, TBX18, SHH, FOXP2                                                                                                                                                                                                                                                                                                                                                                                                           |
| GO:0030003~cellular cation homeostasis                             | 0.001819434 | CALCR, TF, DRD1, CCL2, GRIK2, TACR1, BDKRB2, AGTR1, S1PR3, APOE, AGT, BCL2, TGM2, CHRNA7, KCNMA1, TRPC6, NOX1, TMPRSS3, CCR7, PLCE1, ADM, HPX, F2, MT2A, PLCG2, CACNA1G, SCARA5                                                                                                                                                                                                                                                                |
| GO:0044057~regulation of system process                            | 0.001942205 | TF, DRD1, CCK, CCL2, ADORA2B, GRIK2, TACR1, SNCA, CTNND2, BDKRB2, VGF, ANXA6, AGTR1, BDNF, ACE, BCHE, APOE, HMOX1, AGT, KCNMA1, NOS1, IGF2, PARK2, CPS1, INHBB, PLCE1, ADM, CHRM3, CACNA1G, ALOX5, ADRA1D                                                                                                                                                                                                                                      |
| GO:0022602~ovulation cycle process                                 | 0.001980013 | INHBB, BCL2, STAT5A, AGT, ANGPT1, ADAMTS1, FOXC1, MMP14, BMP1B, VGF, LFNG                                                                                                                                                                                                                                                                                                                                                                      |
| GO:0042981~regulation of apoptosis                                 | 0.001980279 | DLC1, GRIK2, STAT5A, SNCA, TNFSF15, TNFSF14, TP63, TNFSF13, MCF2L, SHH, BDNF, CD44, BOK, APOE, CDKN2C, HMOX1, RARB, ALX4, IL1A, NET1, KCNMA1, CDK1, CRYAB, PRKCI, HRK, F7, RASGRF2, SCIN, F2, FOXC1, CTSB, PRODH, CCL2, CCK, ERBB3, SOX4, CD70, SFN, BDKRB2, SOX9, AGT, BCL2, TGM2, TNFRSF19, DYRK2, NEFL, BMF, TRAF4, HELLS, FGD4, SCG2, ANGPTL4, COL4A3, IL6, EEF1A2, BIRC7, IGF2, PDE3A, SLAMF7, BIRC3, EPHA7, TNFSF10, NUPR1, MUC5AC, BMP7 |
| GO:0019935~cyclic-nucleotide-mediated signaling                    | 0.002162298 | CALCR, DRD1, ADCY1, CCL2, ADORA2B, NPY2R, NPR3, VIPR1, S1PR3, ADM, APOE, AGT, TGM2, RAPGEF4, PDE9A, HTR1D, ADRA1D                                                                                                                                                                                                                                                                                                                              |
| GO:0042325~regulation of phosphorylation                           | 0.002174317 | PARD3, DRD1, ADCY1, PPP1R14D, CCK, ADORA2B, C5, PRKAG2, TNFSF15, ZEB2, BDKRB2, SFN, IL11, DGKA, TSPYL2, APOE, CDKN2C, BCL2, AGT, ADRA2A, CHRNA7, RAPGEF4, PPP1R14C, EGF, FGD4, CDC6, IL6, RBL1, BIRC7, IGF2, PKIB, CDC25A, VEGFC, PLCE1, CCND3, HNF4A, HPX, GADD45G, F2, GADD45B, BMP7, DUSP6                                                                                                                                                  |
| GO:0050801~ion homeostasis                                         | 0.002178986 | CALCR, TF, DRD1, CCK, CCL2, GRIK2, TACR1, SNCA, SLC9A2, BDKRB2, CKB, S1PR3, AGTR1, APOE, HMOX1, BCL2, AGT, TGM2, CHRNA7, KCNMA1, HCN2, TRPC6, NOX1, CPS1, TMPRSS3, CCR7, PLCE1, RHCG, ADM, HPX, NAB1, PLCG2, SLC26A9, F2, MT2A, CACNA1G, PLLP, SCARA5                                                                                                                                                                                          |
| GO:0051240~positive regulation of multicellular organismal process | 0.002181493 | TF, DRD1, CCL2, ADORA2B, GRIK2, TACR1, STAT5A, SNCA, SHH, HMOX1, AGT, BCL2, IL1A, IL6, NOS1, NOX1, IGF2, CPS1, ADM, CHRM3, SERPINF2, F2, CA2, ALOX5, BMP7, BMP1B                                                                                                                                                                                                                                                                               |
| GO:0070161~anchoring junction                                      | 0.002223413 | DLC1, CAV2, DIXDC1, PARD3, LIMA1, SHROOM3, LIMS2, LPP, NPY2R, CTNND2, APBB1IP, CTNNA2, TNS4, LAMA3, RND1, DSG2, CD44, PKP2, PVRL3, DSC2, TJP2                                                                                                                                                                                                                                                                                                  |
| GO:0019229~regulation of vasoconstriction                          | 0.002227226 | AGTR1, ACE, CHRM3, ADM, TACR1, AGT, BDKRB2, ALOX5                                                                                                                                                                                                                                                                                                                                                                                              |

|                                                                 |             |                                                                                                                                                                                                                                                                                                     |
|-----------------------------------------------------------------|-------------|-----------------------------------------------------------------------------------------------------------------------------------------------------------------------------------------------------------------------------------------------------------------------------------------------------|
| GO:0050880~regulation of blood vessel size                      | 0.002279145 | KCNMA1, CAV2, AGTR1, ADORA2B, NTS, APOE, AGT, CACNA1G, FOXC1, ADRA1D                                                                                                                                                                                                                                |
| GO:0035150~regulation of tube size                              | 0.002279145 | KCNMA1, CAV2, AGTR1, ADORA2B, NTS, APOE, AGT, CACNA1G, FOXC1, ADRA1D                                                                                                                                                                                                                                |
| GO:0005520~insulin-like growth factor binding                   | 0.002322628 | WISP2, IGFBPL1, KAZALD1, IGF2, IGFBP1, IGFBP4, CYR61                                                                                                                                                                                                                                                |
| GO:0004435~phosphoinositide phospholipase C activity            | 0.002322628 | PLCL2, PLCE1, PLCB4, CHRM3, PLCG2, PLCH1, BDKRB2                                                                                                                                                                                                                                                    |
| GO:0031960~response to corticosteroid stimulus                  | 0.002388866 | KCNMA1, CALCR, IL6, CCL2, CPS1, TAT, UGT1A1, CPN1, UGT1A6, ADM, BCHE, BCL2, UGT1A4, COL1A1, NEFL                                                                                                                                                                                                    |
| GO:0010464~regulation of mesenchymal cell proliferation         | 0.002389595 | IRS2, TP63, PRRX2, TBX18, SHH, FOXP2                                                                                                                                                                                                                                                                |
| GO:0040008~regulation of growth                                 | 0.002405944 | RBP4, IGFBPL1, STAT5A, TP63, HOXB13, SFN, VGF, GREM1, AGTR1, IGSF11, WISP2, TSPYL2, CD44, APOE, CDKN2C, AGT, HLX, BCL2, RASGRP2, CDA, NET1, CYR61, CRYAB, IGF2, GAS6, RERG, NTRK3, PLCE1, HNF4A, KAZALD1, FOXC1, IGFBP1, IGFBP4                                                                     |
| GO:0019838~growth factor binding                                | 0.00245652  | IL1R2, FGFR4, IGFBPL1, ERBB3, IGF2, COL5A1, NTRK3, WISP2, KAZALD1, TGFBR3, IGFBP1, COL1A1, FGFBP1, IGFBP4, CYR61                                                                                                                                                                                    |
| GO:0032103~positive regulation of response to external stimulus | 0.002525884 | NTRK3, AGTR1, IL6, ADORA2B, C3, STAT5A, AGT, TGM2, F7, CX3CL1, SCG2                                                                                                                                                                                                                                 |
| GO:0051174~regulation of phosphorus metabolic process           | 0.002596525 | DLC1, PARD3, DRD1, ADCY1, PPP1R14D, CCK, ADORA2B, C5, PRKAG2, TNFSF15, ZEB2, BDKRB2, SFN, IL11, DGKA, TSPYL2, APOE, CDKN2C, BCL2, AGT, ADRA2A, CHRNA7, RAPGEF4, PPP1R14C, EGF, FGD4, CDC6, IL6, RBL1, BIRC7, IGF2, PKIB, CDC25A, VEGFC, PLCE1, CCND3, HNF4A, HPX, GADD45G, F2, GADD45B, BMP7, DUSP6 |
| GO:0019220~regulation of phosphate metabolic process            | 0.002596525 | DLC1, PARD3, DRD1, ADCY1, PPP1R14D, CCK, ADORA2B, C5, PRKAG2, TNFSF15, ZEB2, BDKRB2, SFN, IL11, DGKA, TSPYL2, APOE, CDKN2C, BCL2, AGT, ADRA2A, CHRNA7, RAPGEF4, PPP1R14C, EGF, FGD4, CDC6, IL6, RBL1, BIRC7, IGF2, PKIB, CDC25A, VEGFC, PLCE1, CCND3, HNF4A, HPX, GADD45G, F2, GADD45B, BMP7, DUSP6 |
| GO:0001657~ureteric bud development                             | 0.002653536 | BDNF, CD44, BCL2, AGT, FOXC1, RARB, GREM1, SHH                                                                                                                                                                                                                                                      |
| GO:0030414~peptidase inhibitor activity                         | 0.00269435  | CAST, COL4A3, LXN, C3, C5, SNCA, SPINT1, CST2, TNFSF14, CST1, RENBP, COL7A1, SERPINF2, AGT, SERPINE1, PI3, ITIH5, SLPI, TFPI2                                                                                                                                                                       |
| GO:0006875~cellular metal ion homeostasis                       | 0.002798583 | CALCR, KCNMA1, DRD1, CCL2, TRPC6, GRIK2, TACR1, BDKRB2, TMPRSS3, AGTR1, S1PR3, PLCE1, CCR7, ADM, APOE, AGT, BCL2, F2, PLCG2, TGM2, CACNA1G, CHRNA7                                                                                                                                                  |
| GO:0051050~positive regulation of transport                     | 0.002952156 | RBP4, IL6, DRD1, IRS2, ADORA2B, ERBB3, C3, TACR1, SNCA, PRKCI, TNFSF15, TNFSF14, IGF2, SYNGR3, SHH, INHBB, KCNN4, VEGFC, APOE, SCIN, F2, PLCG2, IL1A, NR1H3                                                                                                                                         |
| GO:0042596~fear response                                        | 0.003097221 | DRD1, BDNF, CCK, GRIK2, BCL2, ADRA2A                                                                                                                                                                                                                                                                |
| GO:0045909~positive regulation of                               | 0.003211193 | NOS1, ADM, HMOX1, IGF2, CPS1                                                                                                                                                                                                                                                                        |

|                                                                |             |                                                                                                                                                                                                                                   |
|----------------------------------------------------------------|-------------|-----------------------------------------------------------------------------------------------------------------------------------------------------------------------------------------------------------------------------------|
| vasodilation                                                   |             |                                                                                                                                                                                                                                   |
| GO:0045937~positive regulation of phosphate metabolic process  | 0.003376094 | DLC1, IL6, CCK, PRKAG2, IGF2, IL11, VEGFC, CCND3, HPX, BCL2, AGT, F2, EGF, BMP7                                                                                                                                                   |
| GO:0032868~response to insulin stimulus                        | 0.003376094 | RBP4, IRS2, DRD1, ERBB3, BAIAP2, PRKCI, PDE3B, IGF2, VGF, PHIP, HDAC5, ADM, IGFBP1, PIK3R3                                                                                                                                        |
| GO:0010562~positive regulation of phosphorus metabolic process | 0.003376094 | DLC1, IL6, CCK, PRKAG2, IGF2, IL11, VEGFC, CCND3, HPX, BCL2, AGT, F2, EGF, BMP7                                                                                                                                                   |
| GO:0045834~positive regulation of lipid metabolic process      | 0.003383711 | AGTR1, IRS2, HNF4A, APOE, AGT, APOC1, IGF2, PPARGC1A, NR1H3                                                                                                                                                                       |
| GO:0005581~collagen                                            | 0.003404915 | COL4A3, COL14A1, COL7A1, COL12A1, COL1A1, LOX, COL5A2, COL5A1                                                                                                                                                                     |
| GO:0051674~localization of cell                                | 0.003461773 | NRP2, CAV2, DRD1, NRTN, CCK, CCL2, PLXNA2, CXCL3, ITGA11, TNFSF13, ZEB2, ENPEP, CX3CL1, SHH, CD44, PRSS3, CEACAM1, SCG2, IL6, ARID5B, PODXL, NOX1, DCDC2, MMP14, COL5A1, CTNNA2, VEGFC, ID1, TGFB3, FOXC1                         |
| GO:0048870~cell motility                                       | 0.003461773 | NRP2, CAV2, DRD1, NRTN, CCK, CCL2, PLXNA2, CXCL3, ITGA11, TNFSF13, ZEB2, ENPEP, CX3CL1, SHH, CD44, PRSS3, CEACAM1, SCG2, IL6, ARID5B, PODXL, NOX1, DCDC2, MMP14, COL5A1, CTNNA2, VEGFC, ID1, TGFB3, FOXC1                         |
| GO:0003779~actin binding                                       | 0.00350112  | LIMA1, SHROOM3, PDLIM5, ABLIM3, DIAPH3, KLHL4, CORO2A, ACE, PLS1, PIP, STK38L, FGD4, MYO5C, KCNMA1, DIXDC1, MYO1A, PHACTR2, NCALD, VIL1, MYO1D, SYNPO2, TNS4, FMN2, EPB41L1, MYPN, SCIN, CAPG, POF1B, MARCKS, TMSB4Y, ADD3, SPTB  |
| GO:0042698~ovulation cycle                                     | 0.003564198 | INHBB, BCL2, STAT5A, AGT, ANGPT1, ADAMTS1, FOXC1, MMP14, BMP1B, VGF, LFNG                                                                                                                                                         |
| GO:0005912~adherens junction                                   | 0.003657947 | DLC1, CAV2, DIXDC1, LIMA1, PARD3, SHROOM3, LIMS2, LPP, NPY2R, CTNND2, APBB1IP, CTNNA2, TNS4, LAMA3, RND1, CD44, PKP2, PVRL3, TJP2                                                                                                 |
| GO:0030855~epithelial cell differentiation                     | 0.003683739 | F11R, SHROOM3, ONECUT1, ONECUT2, TP63, HOXB13, EHF, SFN, SCEL, LAMA3, RHCG, FLG, AGT, UPK1B, KRT4, BMP7, EMP1                                                                                                                     |
| GO:0005125~cytokine activity                                   | 0.003684249 | NAMPT, IL6, CCL2, CXCL5, CXCL3, C5, TNFSF15, TNFSF14, CD70, TNFSF13, CX3CL1, IL15, GREM1, TNFSF9, IL11, INHBB, TNFSF10, PPBP, AREG, BMP7, IL1A, SCG2                                                                              |
| GO:0002009~morphogenesis of an epithelium                      | 0.003684276 | DLC1, SHROOM3, TP63, HOXB13, ZEB2, GREM1, SHH, VEGFC, WNT4, CD44, BCL2, AGT, CA2, TBX18                                                                                                                                           |
| GO:0010565~regulation of cellular ketone metabolic process     | 0.003801365 | IRS2, ACSL1, HNF4A, AGT, PRKAG2, SNCA, APOC1, IGF2, PPARGC1A, NR1H3                                                                                                                                                               |
| GO:0055082~cellular chemical homeostasis                       | 0.003851712 | CALCR, TF, DRD1, CCK, CCL2, GRIK2, TACR1, SNCA, BDKRB2, CKB, S1PR3, AGTR1, APOE, AGT, BCL2, TGM2, CHRNA7, KCNMA1, HCN2, TRPC6, NOX1, PPARGC1A, TMPRSS3, CCR7, PLCE1, RHCG, ADM, HPX, NAB1, PLCG2, F2, MT2A, CACNA1G, PLLP, SCARA5 |
| GO:0032869~cellular response to insulin stimulus               | 0.003976953 | PHIP, HDAC5, IRS2, DRD1, ERBB3, BAIAP2, PRKCI, PDE3B, IGF2, IGFBP1, PIK3R3                                                                                                                                                        |
| GO:0006260~DNA replication                                     | 0.004262368 | GINS1, CLSPN, CDC6, HMGB2, DTL, POLE, RAD9B, MCM10, MCM4, MCM5, CDC25A, TK1, MCM6,                                                                                                                                                |



|                                                              |             |                                                                                                                                                                                                                    |
|--------------------------------------------------------------|-------------|--------------------------------------------------------------------------------------------------------------------------------------------------------------------------------------------------------------------|
|                                                              |             | TYMP, MCM8, CDC45, POLE2, RRM2, RRM1, PCNA, EGF                                                                                                                                                                    |
| GO:0035239~tube morphogenesis                                | 0.004353686 | DLC1, SHROOM3, TP63, HOXB13, ZEB2, NR4A3, GREM1, MMP14, SHH, WNT4, CD44, BCL2, AGT, EGF, BMP7, CYR61                                                                                                               |
| GO:0070633~transepithelial transport                         | 0.004437395 | CAV2, P2RY6, RHCG, SLC12A2, SLC23A2                                                                                                                                                                                |
| GO:0030199~collagen fibril organization                      | 0.004455077 | COL14A1, COL12A1, FOXC1, COL1A1, LOX, COL5A2, COL5A1                                                                                                                                                               |
| GO:0070085~glycosylation                                     | 0.004687373 | GCNT4, MGAT4A, GALNT1, ST6GAL2, GALNT7, TSPAN7, TSPAN8, ST6GALNAC1, LARGE, ST8SIA4, B3GNT7, B3GALNT1, FUT1, B3GNT3, GALNT9, TM4SF4                                                                                 |
| GO:0043413~biopolymer glycosylation                          | 0.004687373 | GCNT4, MGAT4A, GALNT1, ST6GAL2, GALNT7, TSPAN7, TSPAN8, ST6GALNAC1, LARGE, ST8SIA4, B3GNT7, B3GALNT1, FUT1, B3GNT3, GALNT9, TM4SF4                                                                                 |
| GO:0006486~protein amino acid glycosylation                  | 0.004687373 | GCNT4, MGAT4A, GALNT1, ST6GAL2, GALNT7, TSPAN7, TSPAN8, ST6GALNAC1, LARGE, ST8SIA4, B3GNT7, B3GALNT1, FUT1, B3GNT3, GALNT9, TM4SF4                                                                                 |
| GO:0055065~metal ion homeostasis                             | 0.004746745 | CALCR, KCNMA1, DRD1, CCL2, TRPC6, GRIK2, TACR1, BDKRB2, TMPRSS3, AGTR1, S1PR3, PLCE1, CCR7, ADM, APOE, AGT, BCL2, F2, PLCG2, TGM2, CACNA1G, CHRNA7                                                                 |
| GO:0002064~epithelial cell development                       | 0.004944797 | SHROOM3, ONECUT1, AGT, ONECUT2, TP63, HOXB13                                                                                                                                                                       |
| GO:0043255~regulation of carbohydrate biosynthetic process   | 0.004944797 | IRS2, PPP1R3C, HNF4A, IGF2, DYRK2, PPARGC1A                                                                                                                                                                        |
| GO:0010873~positive regulation of cholesterol esterification | 0.004982544 | AGTR1, APOE, AGT, APOC1                                                                                                                                                                                            |
| GO:0035112~genitalia morphogenesis                           | 0.004982544 | RBP4, TP63, SYCP2, SHH                                                                                                                                                                                             |
| GO:0033555~multicellular organismal response to stress       | 0.005011398 | DRD1, BDNF, CCK, NOS1, GRIK2, TACR1, BCL2, ADRA2A                                                                                                                                                                  |
| GO:0005604~basement membrane                                 | 0.005030565 | TF, COL4A3, LAMB3, LAMA3, COL7A1, FBN1, LAMC2, ADAMTS1, NID1, VWA1, ENTPD2, COL5A1                                                                                                                                 |
| GO:0048729~tissue morphogenesis                              | 0.005105707 | DLC1, SHROOM3, TP63, HOXB13, ZEB2, NR4A3, GREM1, SHH, VEGFC, FOXQ1, WNT4, CD44, AGT, BCL2, TGFB3, FOXC1, COL1A1, CA2, BMP7, TBX18                                                                                  |
| GO:0043069~negative regulation of programmed cell death      | 0.005237339 | CCL2, GRIK2, ERBB3, STAT5A, SNCA, SOX4, TP63, BDKRB2, SHH, BDNF, APOE, HMOX1, BCL2, AGT, TGM2, NEFL, HELLS, IL1A, SCG2, ANGPTL4, CDK1, IL6, CRYAB, EEF1A2, HRK, BIRC7, PRKCI, IGF2, PDE3A, F7, BIRC3, PLCG2, FOXC1 |
| GO:0005792~microsome                                         | 0.005343964 | CYP3A5, CYP1B1, OAS3, TP63, PDE3B, OAS1, UGT1A6, PPP1R3C, CYP39A1, ACSL1, PTGES, BCL2, HMOX1, UGT1A4, DTNA, FA2H, CYP4F12, UGT1A1, POR, AADAC, CYP4F8, DGAT2, MAP2, CYP4F3, CPD, UGT2B15, LRRK2                    |
| GO:0006873~cellular ion homeostasis                          | 0.005421065 | CALCR, TF, DRD1, CCK, CCL2, GRIK2, TACR1, SNCA, BDKRB2, CKB, S1PR3, AGTR1, APOE, AGT, BCL2, TGM2, CHRNA7, KCNMA1, HCN2, TRPC6, NOX1, TMPRSS3, CCR7, PLCE1, RHCG, ADM, HPX,                                         |

|                                                                                                                                           |             |                                                                                                                                                                                                                                                                                                                  |
|-------------------------------------------------------------------------------------------------------------------------------------------|-------------|------------------------------------------------------------------------------------------------------------------------------------------------------------------------------------------------------------------------------------------------------------------------------------------------------------------|
|                                                                                                                                           |             | NAB1, F2, MT2A, PLCG2, CACNA1G, PLLP, SCARA5                                                                                                                                                                                                                                                                     |
| GO:0060548~negative regulation of cell death                                                                                              | 0.005465262 | CCL2, GRIK2, ERBB3, STAT5A, SNCA, SOX4, TP63, BDKRB2, SHH, BDNF, APOE, HMOX1, BCL2, AGT, TGM2, NEFL, HELLS, IL1A, SCG2, ANGPTL4, CDK1, IL6, CRYAB, EEF1A2, HRK, BIRC7, PRKCI, IGF2, PDE3A, F7, BIRC3, PLCG2, FOXC1                                                                                               |
| GO:0005164~tumor necrosis factor receptor binding                                                                                         | 0.00559134  | TNFSF10, TNFSF15, TNFSF14, CD70, TNFSF13, TNFSF9                                                                                                                                                                                                                                                                 |
| GO:0032102~negative regulation of response to external stimulus                                                                           | 0.005734775 | GPX2, DRD1, CCK, APOE, CHRNA7, IGF2, GREM1, NT5E, CTNNA2                                                                                                                                                                                                                                                         |
| GO:0009266~response to temperature stimulus                                                                                               | 0.005826723 | NOS1, CCL2, DIO2, STAC, ADM, LXN, CRYAB, TACR1, BCL2, AGT, VGF, SCARA5                                                                                                                                                                                                                                           |
| GO:0040007~growth                                                                                                                         | 0.006092667 | FGFR2, GINS1, ST6GAL2, GATM, ARID5B, SHH, PLAUR, FOXP2, INHBB, NUPR1, BCL2, SERPINE1, TGFB3, FOXC1, IGF2, SEPP1, BMP7, BMP1B, TM4SF4, EMP1                                                                                                                                                                       |
| GO:0030001~metal ion transport                                                                                                            | 0.006221247 | KCNH1, FXYD2, TF, KCNAB2, SLC9A2, KCNJ2, ANXA6, KCNQ5, BHLHA15, SLC23A2, KCNK5, SLC4A8, CHRNA7, SLC30A3, SLC4A4, KCNG1, NFATC1, KCNMA1, HCN2, CACNA2D1, SLC12A8, SGK1, SLC12A2, TRPC6, CACNG7, SLC10A7, KCNK1, TCN1, KCNK3, SLC17A7, KCNN4, KCNJ6, SLC17A3, ATP2A3, SLC17A1, F2, CACNA1G, SLC13A2, ABCC8, SCARA5 |
| GO:0019725~cellular homeostasis                                                                                                           | 0.006392832 | CALCR, TF, DRD1, CCK, CCL2, GRIK2, TACR1, SNCA, BDKRB2, CKB, S1PR3, AGTR1, APOE, BCL2, AGT, TGM2, CHRNA7, GLRX, KCNMA1, HCN2, SLC12A2, TRPC6, NOX1, PPARGC1A, TMPRSS3, KCNN4, CCR7, PLCE1, RHCG, NXN, LARGE, ADM, HPX, NAB1, PLCG2, F2, MT2A, CACNA1G, PLLP, SCARA5                                              |
| GO:0001541~ovarian follicle development                                                                                                   | 0.006658012 | INHBB, BCL2, ANGPT1, FOXC1, MMP14, BMP1B, VGF, LFNG                                                                                                                                                                                                                                                              |
| GO:0055066~di-, tri-valent inorganic cation homeostasis                                                                                   | 0.006880564 | CALCR, TF, DRD1, CCL2, TRPC6, GRIK2, TACR1, BDKRB2, AGTR1, S1PR3, PLCE1, CCR7, ADM, APOE, HPX, HMOX1, BCL2, MT2A, F2, PLCG2, TGM2, CACNA1G, CHRNA7, SCARA5                                                                                                                                                       |
| GO:0042327~positive regulation of phosphorylation                                                                                         | 0.007093534 | IL6, CCK, PRKAG2, IGF2, IL11, VEGFC, CCND3, HPX, BCL2, AGT, F2, EGF, BMP7                                                                                                                                                                                                                                        |
| GO:0004629~phospholipase C activity                                                                                                       | 0.007221679 | PLCL2, PLCE1, PLCB4, CHRM3, PLCG2, PLCH1, BDKRB2                                                                                                                                                                                                                                                                 |
| GO:0007200~activation of phospholipase C activity by G-protein coupled receptor protein signaling pathway coupled to IP3 second messenger | 0.007297389 | AGTR1, P2RY6, DRD1, HRH1, PLCE1, TACR1, AGT, TGM2, NPR3                                                                                                                                                                                                                                                          |
| GO:0001932~regulation of protein amino acid phosphorylation                                                                               | 0.007311114 | IL6, CCK, PRKAG2, BIRC7, IGF2, ZEB2, BDKRB2, IL11, VEGFC, CCND3, HNF4A, HPX, AGT, BCL2, F2, RAPGEF4, EGF, BMP7, FGD4                                                                                                                                                                                             |
| GO:0048806~genitalia development                                                                                                          | 0.00746178  | RBP4, SOX2, TP63, SYCP2, SHH, GJB2                                                                                                                                                                                                                                                                               |
| GO:0030005~cellular di-, tri-valent inorganic cation homeostasis                                                                          | 0.007474841 | CALCR, TF, DRD1, CCL2, TRPC6, GRIK2, TACR1, BDKRB2, AGTR1, S1PR3, PLCE1, CCR7, ADM, APOE, HPX, BCL2, MT2A, F2, PLCG2, TGM2, CACNA1G, CHRNA7, SCARA5                                                                                                                                                              |

|                                                                    |             |                                                                                                                                                                                                                                                                                                              |
|--------------------------------------------------------------------|-------------|--------------------------------------------------------------------------------------------------------------------------------------------------------------------------------------------------------------------------------------------------------------------------------------------------------------|
| GO:0030030~cell projection organization                            | 0.007491273 | NRP2, PARD3, NRTN, LIMA1, CCK, ONECUT1, ERBB3, ONECUT2, ITGB4, SHH, BDNF, CD44, ANK3, BCL2, SEMA3B, UNC5C, ROBO3, NEFL, FGD4, KLF5, DNM3, IL6, MYO1A, BAIAP2, CTNNA2, EPHA4, EPHA7, ADM, CAPG, MAP2, BMPR1B, BMP7, SLITRK6                                                                                   |
| GO:0007204~elevation of cytosolic calcium ion concentration        | 0.007611095 | CALCR, DRD1, TRPC6, TACR1, BDKRB2, AGTR1, S1PR3, PLCE1, CCR7, ADM, PLCG2, F2, CACNA1G, TGM2                                                                                                                                                                                                                  |
| GO:0042598~vesicular fraction                                      | 0.007618677 | CYP3A5, CYP1B1, OAS3, TP63, PDE3B, OAS1, UGT1A6, PPP1R3C, CYP39A1, ACSL1, PTGES, BCL2, HMOX1, UGT1A4, DTNA, FA2H, CYP4F12, UGT1A1, POR, AADAC, CYP4F8, DGAT2, MAP2, CYP4F3, CPD, UGT2B15, LRRK2                                                                                                              |
| GO:0043066~negative regulation of apoptosis                        | 0.007633106 | CCL2, GRIK2, ERBB3, STAT5A, SNCA, SOX4, TP63, BDKRB2, SHH, BDNF, APOE, HMOX1, BCL2, AGT, TGM2, NEFL, HELLS, IL1A, SCG2, ANGPTL4, CDK1, IL6, CRYAB, EEF1A2, HRK, BIRC7, PRKCI, IGF2, PDE3A, F7, BIRC3, FOXC1                                                                                                  |
| GO:0010872~regulation of cholesterol esterification                | 0.007646488 | AGTR1, APOE, AGT, APOC1                                                                                                                                                                                                                                                                                      |
| GO:0060343~trabecula formation                                     | 0.007646488 | RBP4, TGFBR3, ADAMTS1, COL1A1                                                                                                                                                                                                                                                                                |
| GO:0007507~heart development                                       | 0.008110507 | DLC1, NRP2, RBP4, ERBB3, FBN1, SOX4, EGLN1, MECOM, SOX9, COL5A1, SHH, HDAC5, PLCE1, ADM, PKP2, ID1, TGFBR3, FOXC1, ADAMTS1, RARB, NFATC1, MB                                                                                                                                                                 |
| GO:0008092~cytoskeletal protein binding                            | 0.008201678 | TPPP3, LIMA1, SHROOM3, PDLIM5, ABLIM3, DIAPH3, SNCA, EPB41L4A, KLHL4, SDC2, FRMD3, HOOK2, CORO2A, ACE, APOE, PLS1, PIP, STK38L, FGD4, MYO5C, KCNMA1, DIXDC1, PHACTR2, MYO1A, NCALD, CRYAB, BAIAP2, VIL1, MYO1D, SYNPO2, TNS4, FMN2, EPB41L1, RHCG, MYPN, TPPP, CAPG, SCIN, POF1B, MARCKS, TMSB4Y, ADD3, SPTB |
| GO:0060191~regulation of lipase activity                           | 0.008287963 | AGTR1, P2RY6, DRD1, HRH1, PLCE1, TACR1, AGT, APOC1, TGM2, NPR3, ANGPTL4, NR1H3                                                                                                                                                                                                                               |
| GO:0032535~regulation of cellular component size                   | 0.008410034 | FGFR2, LIMA1, TP63, SFN, GREM1, CDC42EP2, TSPYL2, CDKN2C, AGT, BCL2, CDA, NEFL, CRYAB, VIL1, IGF2, NTRK3, RERG, HNF4A, NUPR1, CAPG, SCIN, TGFBR3, TMSB4Y, IGFBP1, EMP1, SPTB                                                                                                                                 |
| GO:0031093~platelet alpha granule lumen                            | 0.008433323 | VEGFC, FGG, F5, PPBP, FGB, SERPINF2, EGF, CFD                                                                                                                                                                                                                                                                |
| GO:0006939~smooth muscle contraction                               | 0.00861194  | KCNMA1, DRD1, CHRM3, TACR1, AGT, CACNA1G, BDKRB2                                                                                                                                                                                                                                                             |
| GO:0007162~negative regulation of cell adhesion                    | 0.008675897 | RND1, ERBB3, PODXL, TGFBI, PDE3B, COL1A1, MMP14, ARHGDI1B                                                                                                                                                                                                                                                    |
| GO:0048015~phosphoinositide-mediated signaling                     | 0.009013769 | AGTR1, P2RY6, HMGB2, DRD1, HRH1, PLCE1, TACR1, ZWINT, AGT, TGM2, PCNA, NPR3                                                                                                                                                                                                                                  |
| GO:0048754~branching morphogenesis of a tube                       | 0.0091336   | CD44, BCL2, AGT, HOXB13, MMP14, EGF, GREM1, BMP7, SHH, CYR61                                                                                                                                                                                                                                                 |
| GO:0051241~negative regulation of multicellular organismal process | 0.009307355 | KCNMA1, RBP4, DRD1, IL6, ADORA2B, GRIK2, APOC1, TSPAN8, IGF2, SOX9, ADM, BCHE, APOE, HMOX1, F2, SERPINE1, CHRNA7, ADRA1D                                                                                                                                                                                     |
| GO:0006979~response to oxidative stress                            | 0.009307355 | PXDN, GATM, CRYAB, SNCA, MMP14, TAT, GPX2,                                                                                                                                                                                                                                                                   |

|                                                                        |             |                                                                                                                                                                                                                                                                                                                              |
|------------------------------------------------------------------------|-------------|------------------------------------------------------------------------------------------------------------------------------------------------------------------------------------------------------------------------------------------------------------------------------------------------------------------------------|
|                                                                        |             | NPTXR, APOE, SLC23A2, HMOX1, BCL2, GPX3, SERPINE1, SCARA3, SEPP1, COL1A1, MB                                                                                                                                                                                                                                                 |
| GO:0006952~defense response                                            | 0.009657901 | KLRC2, GRIK2, TACR1, SNCA, IL15, S1PR3, CD44, HMOX1, CFH, CFD, IL1A, F11R, CHST2, DCDC2, MECOM, INHBB, CCR7, PPBP, SERPINF2, F2, MST1R, TF, DRD1, CCK, CCL2, ADORA2B, C3, CXCL3, C5, BDKRB2, CX3CL1, HRH1, BCL2, TFF3, SCG2, IL6, NOX1, IGF2, C4BPB, C4BPA, SLAMF7, HDAC5, APOL2, KCNN4, APOL1, NUPR1, ALOX5, BMPR1B, IGFBP4 |
| GO:0005506~iron ion binding                                            | 0.009691963 | CYP24A1, CYP3A5, TF, PXDN, CYP1B1, UTY, SNCA, EGLN1, CYP39A1, HMOX1, P4HA3, NT5E, KDM5D, MOCS1, MB, NOS1, FA2H, NOX1, FADS3, CYP4F12, POR, FRRS1, CYP4F8, HPX, RRM2, CYP4F3, ALOX5, DPYD, SCARA5                                                                                                                             |
| GO:0001934~positive regulation of protein amino acid phosphorylation   | 0.009787724 | VEGFC, IL6, CCK, CCND3, HPX, BCL2, AGT, PRKAG2, F2, IGF2, BMP7, IL11                                                                                                                                                                                                                                                         |
| GO:0001656~metanephros development                                     | 0.009838074 | BDNF, CD44, BCL2, AGT, FOXC1, RARB, GREM1, SHH                                                                                                                                                                                                                                                                               |
| GO:0051384~response to glucocorticoid stimulus                         | 0.010511703 | CALCR, IL6, CCL2, CPS1, UGT1A1, TAT, CPN1, UGT1A6, ADM, BCHE, BCL2, UGT1A4, NEFL                                                                                                                                                                                                                                             |
| GO:0060341~regulation of cellular localization                         | 0.010540416 | RBP4, RAB3B, IL6, ADORA2B, CRYAB, SNCA, TNFSF15, PDE3B, TNFSF14, IGF2, KRT20, PARK2, SHH, IL11, INHBB, KCNN4, VEGFC, HNF4A, HMOX1, AGT, RAPGEF4, RAB27B, EGF, IL1A                                                                                                                                                           |
| GO:0003006~reproductive developmental process                          | 0.010686019 | RBP4, HMGB2, STAT5A, SOX2, TP63, HOXB13, SOX9, VGF, SYCP2, SHH, WNT4, AGT, BCL2, ANGPT1, LHX8, LFNG, PCSK4, PDE3A, MMP14, CDKL2, GJB2, INHBB, ADAMTS1, FOXC1, BMPR1B                                                                                                                                                         |
| GO:0031420~alkali metal ion binding                                    | 0.010783097 | KCNH1, KCNMA1, HCN2, FXYD2, SLC12A8, SLC12A2, KCNAB2, SLC9A2, SLC10A7, KCNJ2, KCNK1, KCNK3, SLC17A7, KCNQ5, KCNJ6, SLC17A3, SLC23A2, SLC17A1, KCNK5, SLC4A8, SLC13A2, SLC4A4, KCNG1                                                                                                                                          |
| GO:0010574~regulation of vascular endothelial growth factor production | 0.011002689 | IL6, ADORA2B, NOX1, IL1A                                                                                                                                                                                                                                                                                                     |
| GO:0015293~symporter activity                                          | 0.011183541 | SLC16A14, SLC2A13, SLC12A8, SLC12A2, SLC6A14, SLC10A7, SLC6A17, SLC17A7, SLC16A2, SLC17A3, SLC16A7, SLC2A3, SLC23A2, SLC17A1, SLC13A2, SLC4A4                                                                                                                                                                                |
| GO:0051130~positive regulation of cellular component organization      | 0.011430518 | CAV2, CCK, C3, TACR1, NOX1, SNCA, PRKCI, IGF2, ESPL1, PPARGC1A, AHR, NTRK3, METRN, CDC42EP2, TPPP, DNMT1, EGF, NEFL, IL1A                                                                                                                                                                                                    |
| GO:0010906~regulation of glucose metabolic process                     | 0.011495933 | IRS2, PPP1R3C, HNF4A, PRKAG2, IGF2, DYRK2, PPARGC1A                                                                                                                                                                                                                                                                          |
| GO:0060205~cytoplasmic membrane-bounded vesicle lumen                  | 0.012381802 | VEGFC, FGG, F5, PPBP, FGB, SERPINF2, EGF, CFD                                                                                                                                                                                                                                                                                |
| GO:0010810~regulation of cell-substrate adhesion                       | 0.012496536 | ONECUT1, BCL2, ONECUT2, NID1, EDIL3, COL1A1, MMP14, CYR61                                                                                                                                                                                                                                                                    |
| GO:0006874~cellular calcium ion homeostasis                            | 0.012704594 | CALCR, DRD1, CCL2, TRPC6, GRIK2, TACR1, BDKRB2, AGTR1, S1PR3, PLCE1, CCR7, ADM, APOE, BCL2, F2, PLCG2, CACNA1G, TGM2, CHRNA7                                                                                                                                                                                                 |

|                                                                    |             |                                                                                                                                                                                                                                                     |
|--------------------------------------------------------------------|-------------|-----------------------------------------------------------------------------------------------------------------------------------------------------------------------------------------------------------------------------------------------------|
| GO:0004714~transmembrane receptor protein tyrosine kinase activity | 0.013211971 | NRP2, NTRK3, FGFR2, EPHA4, EPHA7, FGFR4, ERBB3, MST1R, MERTK, EPHA2                                                                                                                                                                                 |
| GO:0051480~cytosolic calcium ion homeostasis                       | 0.013374002 | CALCR, DRD1, TRPC6, TACR1, BDKRB2, AGTR1, S1PR3, PLCE1, CCR7, ADM, PLCG2, F2, CACNA1G, TGM2                                                                                                                                                         |
| GO:0000165~MAPKKK cascade                                          | 0.01338233  | NRTN, ADORA2B, CRYAB, C5, BIRC7, IGF2, MAPK10, PLCE1, DOK5, GADD45G, ADRA2A, TNFRSF19, CHRNA7, LRRK2, GADD45B, EGF, FGD4, DUSP6, SCG2                                                                                                               |
| GO:0050708~regulation of protein secretion                         | 0.013921021 | KCNN4, VEGFC, RBP4, IL6, TNFSF15, IGF2, KRT20, EGF, IL1A                                                                                                                                                                                            |
| GO:0009101~glycoprotein biosynthetic process                       | 0.014064419 | MGAT4A, GCNT4, GALNT1, ST6GAL2, GALNT7, TSPAN7, TSPAN8, ST6GALNAC1, LARGE, ST8SIA4, B3GNT7, B3GALNT1, CHST13, FUT1, B3GNT3, GALNT9, TM4SF4                                                                                                          |
| GO:0010639~negative regulation of organelle organization           | 0.014686128 | DLC1, LIMA1, SCIN, MAP2, SNCA, CAPG, VIL1, DNMT1, ESPL1, TMSB4Y, SPTB                                                                                                                                                                               |
| GO:0031175~neuron projection development                           | 0.01497966  | NRP2, PARD3, NRTN, IL6, CCK, ERBB3, BAIAP2, SHH, CTNNA2, EPHA4, BDNF, EPHA7, ADM, CD44, ANK3, BCL2, MAP2, SEMA3B, UNC5C, ROBO3, BMP7, BMPR1B, SLITRK6, NEFL                                                                                         |
| GO:0001837~epithelial to mesenchymal transition                    | 0.015239101 | S100A4, TGFBR3, SOX9, BMP7, NFATC1                                                                                                                                                                                                                  |
| GO:0043068~positive regulation of programmed cell death            | 0.015515219 | DLC1, CCK, GRIK2, SOX4, TP63, TNFSF14, CD70, TNFSF13, SFN, MCF2L, CD44, APOE, CDKN2C, BOK, HMOX1, AGT, BCL2, TGM2, TNFRSF19, DYRK2, RARB, NET1, FGD4, KCNMA1, COL4A3, HRK, SLAMF7, TNFSF10, EPHA7, NUPR1, RASGRF2, SCIN, MUC5AC, BMP7, LRRK2, PRODH |
| GO:0031983~vesicle lumen                                           | 0.015661119 | VEGFC, FGG, F5, PPBP, FGB, SERPINF2, EGF, CFD                                                                                                                                                                                                       |
| GO:0001666~response to hypoxia                                     | 0.016212915 | KCNMA1, TF, CCL2, NOS1, EGLN1, MMP14, SHH, ACE, ADM, HMOX1, BCL2, CHRNA7, ANGPT1, ANGPTL4, MB                                                                                                                                                       |
| GO:0055074~calcium ion homeostasis                                 | 0.016382308 | CALCR, DRD1, CCL2, TRPC6, GRIK2, TACR1, BDKRB2, AGTR1, S1PR3, PLCE1, CCR7, ADM, APOE, BCL2, F2, PLCG2, CACNA1G, TGM2, CHRNA7                                                                                                                        |
| GO:0010942~positive regulation of cell death                       | 0.016427967 | DLC1, CCK, GRIK2, SOX4, TP63, TNFSF14, CD70, TNFSF13, SFN, MCF2L, CD44, APOE, CDKN2C, BOK, HMOX1, AGT, BCL2, TGM2, TNFRSF19, DYRK2, RARB, NET1, FGD4, KCNMA1, COL4A3, HRK, SLAMF7, TNFSF10, EPHA7, NUPR1, RASGRF2, SCIN, MUC5AC, BMP7, LRRK2, PRODH |
| GO:0000904~cell morphogenesis involved in differentiation          | 0.016483149 | S100A4, NRP2, PARD3, CCK, ERBB3, BAIAP2, SOX9, SHH, CTNNA2, EPHA4, BDNF, EPHA7, ANK3, BCL2, TGFBR3, SEMA3B, UNC5C, ROBO3, BMP7, SLITRK6, BMPR1B, NEFL, NFATC1                                                                                       |
| GO:0008202~steroid metabolic process                               | 0.016533689 | ACOX2, CYP24A1, CYP3A5, CYP1B1, HSD17B14, PRKAG2, SORL1, APOC1, ABCA1, UGT1A1, SHH, APOL2, UGT1A6, CYP39A1, APOL1, BAAT, ADM, APOE, UGT1A4, OSBPL10, UGT2B15, NR5A2                                                                                 |
| GO:0004653~polypeptide N-acetylgalactosaminyltransferase activity  | 0.016800519 | GALNT1, GALNT7, GALNT5, GALNT4, GALNT9                                                                                                                                                                                                              |

|                                                                  |             |                                                                                                                                                                                                                                                                                                                                                                                                                                                 |
|------------------------------------------------------------------|-------------|-------------------------------------------------------------------------------------------------------------------------------------------------------------------------------------------------------------------------------------------------------------------------------------------------------------------------------------------------------------------------------------------------------------------------------------------------|
| GO:0033860~regulation of NAD(P)H oxidase activity                | 0.017001128 | AGTR1, AGT, IGF2                                                                                                                                                                                                                                                                                                                                                                                                                                |
| GO:0010675~regulation of cellular carbohydrate metabolic process | 0.017005191 | IRS2, PPP1R3C, HNF4A, PRKAG2, IGF2, DYRK2, PPARGC1A                                                                                                                                                                                                                                                                                                                                                                                             |
| GO:0006468~protein amino acid phosphorylation                    | 0.017408243 | STAT5A, AURKB, FES, CAMKK1, PRKY, PAK3, MAP3K8, MLKL, CHRNA7, CDK1, SGK1, PRKCI, CDKL2, PLCE1, F2, GADD45G, MST1R, LRRK2, GADD45B, FGFR2, FRK, CAV2, FGFR4, CCL2, ADORA2B, ERBB3, C5, BCL2, ADRA2A, DYRK2, EGF, STK38L, FGD4, PDK4, BIRC7, MAPK10, EPHA2, RPS6KL1, NTRK3, GLYCTK, EPHA4, IKBKE, CDC42BPG, EPHA7, MAP2, TGFBR3, JAK3, MERTK, BMP7, CIT, BMPR1B                                                                                   |
| GO:0015672~monovalent inorganic cation transport                 | 0.017683747 | KCNH1, FXYD2, KCNAB2, SLC9A2, KCNJ2, KCNQ5, SLC23A2, KCNK5, SLC4A8, SLC4A4, ATP6V0D2, KCNG1, KCNMA1, HCN2, SGK1, SLC12A8, SLC12A2, NOX1, SLC10A7, KCNK1, KCNK3, SLC17A7, KCNN4, KCNJ6, SLC17A3, SLC17A1, SLC13A2, ABCC8                                                                                                                                                                                                                         |
| GO:0060348~bone development                                      | 0.01839348  | CYP24A1, PDLIM7, IGF2, SOX9, MMP14, COL5A2, SHH, KAZALD1, BCL2, NAB1, FOXC1, COL1A1, BMP7, RUNX2                                                                                                                                                                                                                                                                                                                                                |
| GO:0010907~positive regulation of glucose metabolic process      | 0.018476935 | IRS2, HNF4A, IGF2, DYRK2, PPARGC1A                                                                                                                                                                                                                                                                                                                                                                                                              |
| GO:0046661~male sex differentiation                              | 0.018803265 | RBP4, HMGB2, WNT4, BCL2, STAT5A, SOX2, SOX9, SYCP2, SHH, GJB2                                                                                                                                                                                                                                                                                                                                                                                   |
| GO:0008219~cell death                                            | 0.019137368 | DLC1, E2F1, E2F2, GRIK2, TNFSF15, TP63, TNFSF13, MCF2L, BOK, HMOX1, C8ORF4, UNC5C, MAGEH1, IL1A, NET1, HYAL1, MAGI3, SGK1, FA2H, HRK, ESPL1, AHR, TNS4, RASGRF2, GADD45G, F2, CTSD, GADD45B, PHLPP1, CCK, ERBB3, C5, SFN, KRT20, SYCP2, GREM1, GRAMD4, BCL2, TGM2, TNFRSF19, DYRK2, BMF, TRAF4, FGD4, RNF144B, COL4A3, IL6, BIRC7, IGF2, BIRC3, TNFSF9, TNFSF10, APOL1, MUC5AC                                                                  |
| GO:0006109~regulation of carbohydrate metabolic process          | 0.019185881 | IRS2, PPP1R3C, HNF4A, PRKAG2, IGF2, DYRK2, PPARGC1A                                                                                                                                                                                                                                                                                                                                                                                             |
| GO:0040017~positive regulation of locomotion                     | 0.019252145 | VEGFC, IRS2, DRD1, IL6, ONECUT1, TACR1, BCL2, AGT, ONECUT2, IGF2, F7, SCG2                                                                                                                                                                                                                                                                                                                                                                      |
| GO:0006811~ion transport                                         | 0.019617202 | KCNH1, SLC22A17, KCNAB2, GRIK2, SLC9A2, KCNQ5, BHLHA15, SLC23A2, KCNK5, CHRNA7, SLC4A4, ATP6V0D2, SLC4A3, KCNG1, ANO9, GRID1, KCNMA1, SLC12A8, GABRG3, SGK1, CACNG7, TCN1, RHCG, F2, SLC26A9, PLLP, FXYD2, TF, CAV2, KCNJ2, PKD1L2, ANXA6, P2RY6, SLC4A8, SLC30A3, GABRP, NFATC1, HCN2, CACNA2D1, TRPC6, SLC12A2, NOX1, SLC10A7, KCNK1, KCNK3, SLC17A7, KCNN4, KCNJ6, APOL1, SLC17A3, SLC16A7, ATP2A3, SLC17A1, CACNA1G, SLC13A2, ABCC8, SCARA5 |
| GO:0006916~anti-apoptosis                                        | 0.0199148   | CDK1, CCL2, CRYAB, EEF1A2, STAT5A, SNCA, HRK, PRKCI, BIRC7, TP63, F7, BIRC3, BDNF, APOE, HMOX1, BCL2, TGM2, FOXC1, HELLS, IL1A                                                                                                                                                                                                                                                                                                                  |
| GO:0043588~skin development                                      | 0.020049404 | TP63, SFN, COL1A1, COL5A2, COL5A1, SHH                                                                                                                                                                                                                                                                                                                                                                                                          |

|                                                         |             |                                                                                                                                                                                                                                                                                                                                                                                                                                                                                                                                                                                                                                                                                                                                                                                                                                                                                                                                                                                                                                                                                                                                                                                                    |
|---------------------------------------------------------|-------------|----------------------------------------------------------------------------------------------------------------------------------------------------------------------------------------------------------------------------------------------------------------------------------------------------------------------------------------------------------------------------------------------------------------------------------------------------------------------------------------------------------------------------------------------------------------------------------------------------------------------------------------------------------------------------------------------------------------------------------------------------------------------------------------------------------------------------------------------------------------------------------------------------------------------------------------------------------------------------------------------------------------------------------------------------------------------------------------------------------------------------------------------------------------------------------------------------|
| GO:0012501~programmed cell death                        | 0.020131463 | DLC1, PHLPP1, E2F1, E2F2, CCK, GRIK2, ERBB3, TNFSF15, TP63, TNFSF13, KRT20, SFN, SYCP2, GREM1, GRAMD4, MCF2L, BOK, BCL2, TGM2, C8ORF4, TNFRSF19, DYRK2, UNC5C, BMF, MAGEH1, IL1A, TRAF4, NET1, FGD4, RNF144B, COL4A3, MAGI3, IL6, SGK1, HRK, BIRC7, ESPL1, TNFSF9, BIRC3, AHR, TNS4, TNFSF10, RASGRF2, GADD45G, F2, MUC5AC, GADD45B                                                                                                                                                                                                                                                                                                                                                                                                                                                                                                                                                                                                                                                                                                                                                                                                                                                                |
| GO:0051094~positive regulation of developmental process | 0.020392464 | PDLIM7, STAT5A, SOX2, TNFSF13, SHH, AGTR1, BDNF, METRN, AGT, HLX, BCL2, CHRNA7, DDAH1, RUNX2, NEFL, IL1A, ANGPTL4, IL6, IGF2, NTRK3, VEGFC, SCIN, CA2, BMP7, BMPR1B                                                                                                                                                                                                                                                                                                                                                                                                                                                                                                                                                                                                                                                                                                                                                                                                                                                                                                                                                                                                                                |
| GO:0007409~axonogenesis                                 | 0.020840096 | NRP2, PARD3, CCK, ERBB3, BAIAP2, SHH, CTNNA2, EPHA4, BDNF, EPHA7, ANK3, BCL2, SEMA3B, ROBO3, UNC5C, BMP7, SLITRK6, BMPR1B, NEFL                                                                                                                                                                                                                                                                                                                                                                                                                                                                                                                                                                                                                                                                                                                                                                                                                                                                                                                                                                                                                                                                    |
| GO:0006953~acute-phase response                         | 0.021549665 | APOL2, TF, IL6, SERPINF2, F2, IGF2, IL1A                                                                                                                                                                                                                                                                                                                                                                                                                                                                                                                                                                                                                                                                                                                                                                                                                                                                                                                                                                                                                                                                                                                                                           |
| GO:0016265~death                                        | 0.021700881 | DLC1, E2F1, E2F2, GRIK2, TNFSF15, TP63, TNFSF13, MCF2L, BOK, HMOX1, C8ORF4, UNC5C, MAGEH1, IL1A, NET1, HYAL1, MAGI3, SGK1, FA2H, HRK, ESPL1, AHR, TNS4, RASGRF2, GADD45G, F2, CTSD, GADD45B, PHLPP1, CCK, ERBB3, C5, SFN, KRT20, SYCP2, GREM1, GRAMD4, BCL2, TGM2, TNFRSF19, DYRK2, BMF, TRAF4, FGD4, RNF144B, COL4A3, IL6, BIRC7, IGF2, BIRC3, TNFSF9, TNFSF10, APOL1, MUC5AC                                                                                                                                                                                                                                                                                                                                                                                                                                                                                                                                                                                                                                                                                                                                                                                                                     |
| GO:0031224~intrinsic to membrane                        | 0.021916889 | KLRC2, ADCY1, GPR124, CADM2, VTCN1, SLC9A2, SYT6, SIDT1, MEGF11, AQP3, SHH, LPHN2, AGTR1, S1PR3, LPHN3, MALL, CD44, KCNK5, S1PR5, CREB3L1, CHRNA7, HTR1D, RAB27B, MUC13, GRID1, F11R, SLC12A8, ATRNL1, EFNB2, PTPRR, LHFP, SIRPA, PTPRO, PLAUR, TMEM133, AADAC, CCR7, VSIG1, RHCG, LPAR5, KIAA1524, MGAM, FER1L6, MST1R, GCNT4, SLC2A13, IL1R2, CATSPERB, ERBB3, TMEM121, ITGA11, FCGRT, CD70, BDKRB2, KCNJ2, MANSC1, ITGBL1, TMCC2, ACE, LPCAT1, PVRL3, UPK1B, LFNG, MGAT4A, ST6GAL2, BRI3BP, TRPC6, PCDH10, SLAMF7, KCNK1, SYNGR3, EPHA2, KCNK3, ABCG2, NTRK3, EPHA4, GGT5, SEMA6B, EPHA7, APOL1, KCNJ6, NLGN4Y, EPS8, ATP2A3, PKP2, GOLGA7B, TGFB3, MARCKS, AREG, BTBD11, NRP2, KCNH1, SLC16A14, KCNAB2, SUSD2, C14ORF132, PTGES, SLC23A2, CHST13, CEACAM6, CEACAM5, NT5E, CEACAM1, KCNG1, DPEP1, KCNMA1, ADAM11, GPR176, LPGAT1, CACNG7, CDS1, MMP14, ST6GALNAC1, KIAA1161, SEMA4G, ALG10B, SLC26A9, SGCD, SUSD4, MOSPD1, GRAMD1B, PARD3, FAM69A, NPY2R, GPR64, C5, SLC19A3, XKRX, C2ORF82, IGSF11, FNDC4, GLIPR2, ACSL1, BCL2, SLC4A8, CD22, FUT1, ARMCX1, UGT8, PCSK4, FLRT2, PLA2G16, IL6, FADS3, CYP4F12, NPR3, FAAH2, TMPRSS3, GJB1, GJB2, SLC16A2, CDH15, LARGE, SLC16A7, PLSCR4, CDH17, |

|                                                                           |             |                                                                                                                                                                                                                                                                                                                                                                                                                                                                                                                                                                                                                                                                                                                                                                                                                                                                                                                                                                                                                                                                                                                                                                                                                                                                                                                                                                                                                                                                                                    |
|---------------------------------------------------------------------------|-------------|----------------------------------------------------------------------------------------------------------------------------------------------------------------------------------------------------------------------------------------------------------------------------------------------------------------------------------------------------------------------------------------------------------------------------------------------------------------------------------------------------------------------------------------------------------------------------------------------------------------------------------------------------------------------------------------------------------------------------------------------------------------------------------------------------------------------------------------------------------------------------------------------------------------------------------------------------------------------------------------------------------------------------------------------------------------------------------------------------------------------------------------------------------------------------------------------------------------------------------------------------------------------------------------------------------------------------------------------------------------------------------------------------------------------------------------------------------------------------------------------------|
|                                                                           |             | <p>TMTC1, GFRA1, TMTC2, ABCC8, GREB1L, CDH10, SLC22A17, MPZL3, TSPAN1, SLC44A3, GRIK2, PLXNA2, TNFSF15, LRRC4B, TNFSF14, TSPAN7, PDE3B, TSPAN8, TNFSF13, ENPEP, IL15, VIPR1, IL17RD, SLC7A7, SLC2A3, ELOVL4, B3GALNT1, SLC25A29, TMEM98, ROBO3, UNC5C, SLC4A4, SLC4A3, SPTLC3, FA2H, BASP1, FIBCD1, MOXD1, LAT2, THBD, VAMP8, DLL4, CPD, VAMP1, SLITRK6, GBP3, EMP1, SPTB, ABCA8, FGFR2, CAV2, FXYD2, PAM, FGFR4, DRD1, ADORA2B, IFITM3, ITGB4, NKAIN4, ABCA1, CX3CL1, ABCA4, P2RY6, ITGB8, FOLR1, ENTPD7, B3GNT7, MSLN, FAM189A2, PTPLA, ADRA2A, HEG1, SDR16C5, B3GNT3, SLC30A3, PCDHA13, EGF, ENTPD2, GABRP, B4GALT5, ADAM28, MUC1, HCN2, CACNA2D1, ADAM23, UST, PODXL, SYT11, MRC2, SYT12, GOLIM4, SLC6A14, SLC6A17, REEP2, THSD7A, TNFSF10, GPR37, DIO2, DSG2, SLC7A2, ST8SIA4, CD274, CACNA1G, SLC13A2, TMPO, SCARA3, MERTK, CEND1, SCARA5, ADRA1D, CLDN4, SGPP2, TACR1, SORL1, BCAM, LGR6, SYNGR2, SDC2, CCRL2, EPCAM, FRMD3, TSPAN12, KCNQ5, PLEKHB1, GPC6, DENND5B, SLC43A1, ANO9, CSF2RA, SLC43A2, KIRREL3, PARM1, GABRG3, NRXN2, CHST2, PCDH9, WLS, MAN1A1, PCDH7, UGT1A1, MUC3A, NPTXR, CHRM3, DGAT2, CD82, CNTN1, PLLP, UGT2B15, GALNT9, TM4SF4, CALCR, GALNT1, GALNT7, MAL2, GALNT5, GALNT4, PCDHGC3, GPRC5A, GRAMD4, PKD1L2, UGT1A6, CDH7, HRH1, PRRG4, UGT1A4, RNF128, PALM3, TNFRSF19, PLA2R1, PTPRB, RNF144B, TMEM45B, SLC12A2, NOX1, TSPAN13, SLC10A7, TMEM52, GDPD5, TNFSF9, SLC17A7, FRRS1, KCNN4, CYP4F8, TMEM47, SLC17A3, SLC17A1, DSC2, CYP4F3, TMEM86A, BMPR1B, GPR115</p> |
| GO:0060193~positive regulation of lipase activity                         | 0.022081763 | AGTR1, P2RY6, DRD1, HRH1, PLCE1, TACR1, AGT, TGM2, NPR3, NR1H3                                                                                                                                                                                                                                                                                                                                                                                                                                                                                                                                                                                                                                                                                                                                                                                                                                                                                                                                                                                                                                                                                                                                                                                                                                                                                                                                                                                                                                     |
| GO:0000302~response to reactive oxygen species                            | 0.022081763 | PXDN, NPTXR, APOE, CRYAB, HMOX1, BCL2, GPX3, SERPINE1, COL1A1, MB                                                                                                                                                                                                                                                                                                                                                                                                                                                                                                                                                                                                                                                                                                                                                                                                                                                                                                                                                                                                                                                                                                                                                                                                                                                                                                                                                                                                                                  |
| GO:0010676~positive regulation of cellular carbohydrate metabolic process | 0.022110107 | IRS2, HNF4A, IGF2, DYRK2, PPARGC1A                                                                                                                                                                                                                                                                                                                                                                                                                                                                                                                                                                                                                                                                                                                                                                                                                                                                                                                                                                                                                                                                                                                                                                                                                                                                                                                                                                                                                                                                 |
| GO:0045913~positive regulation of carbohydrate metabolic process          | 0.022110107 | IRS2, HNF4A, IGF2, DYRK2, PPARGC1A                                                                                                                                                                                                                                                                                                                                                                                                                                                                                                                                                                                                                                                                                                                                                                                                                                                                                                                                                                                                                                                                                                                                                                                                                                                                                                                                                                                                                                                                 |
| GO:0009065~glutamine family amino acid catabolic process                  | 0.022110107 | NOS1, PRODH2, ASRGL1, DDAH1, PRODH                                                                                                                                                                                                                                                                                                                                                                                                                                                                                                                                                                                                                                                                                                                                                                                                                                                                                                                                                                                                                                                                                                                                                                                                                                                                                                                                                                                                                                                                 |
| GO:0048666~neuron development                                             | 0.022271462 | NRP2, PARD3, DRD1, NRTN, CCK, ERBB3, ONECUT2, SHH, BDNF, CD44, ANK3, BCL2, SEMA3B, UNC5C, ROBO3, LHX8, NEFL, IL6, BAIAP2, PRKCI, CTNNA2, EPHA4, EPHA7, RND1, ADM, MAP2, BMP7, SLITRK6, BMPR1B                                                                                                                                                                                                                                                                                                                                                                                                                                                                                                                                                                                                                                                                                                                                                                                                                                                                                                                                                                                                                                                                                                                                                                                                                                                                                                      |
| GO:0006812~cation transport                                               | 0.022674233 | KCNH1, FXYD2, TF, KCNAB2, SLC9A2, KCNJ2, ANXA6, KCNQ5, BHLHA15, SLC23A2, KCNK5, SLC4A8, CHRNA7, SLC30A3, SLC4A4, ATP6V0D2, KCNG1, NFATC1, KCNMA1, HCN2, CACNA2D1,                                                                                                                                                                                                                                                                                                                                                                                                                                                                                                                                                                                                                                                                                                                                                                                                                                                                                                                                                                                                                                                                                                                                                                                                                                                                                                                                  |



|                                                                   |             |                                                                                                                                                                                                                                                                                                                                                       |
|-------------------------------------------------------------------|-------------|-------------------------------------------------------------------------------------------------------------------------------------------------------------------------------------------------------------------------------------------------------------------------------------------------------------------------------------------------------|
|                                                                   |             | SLC12A8, SGK1, SLC12A2, TRPC6, CACNG7, NOX1, SLC10A7, KCNK1, TCN1, KCNK3, SLC17A7, KCNN4, KCNJ6, RHCG, SLC17A3, ATP2A3, SLC17A1, F2, CACNA1G, SLC13A2, ABCC8, SCARA5                                                                                                                                                                                  |
| GO:0009891~positive regulation of biosynthetic process            | 0.023308998 | E2F1, STAT5A, TP63, SHH, IL11, BHLHA15, APOE, HMOX1, FOXF2, RARB, ALX4, DDAH1, IL1A, IRS2, MECOM, PPARGC1A, AHR, HNF4A, F2, FOXC1, SMARCA2, DRD1, HMGB2, ADORA2B, ABLIM3, SOX2, ONECUT2, SOX4, EHF, ABCA1, SOX9, HRH1, AGT, DYRK2, TCF4, RUNX2, NR1H3, KLF5, IL6, IKZF2, MAML2, NOX1, IGF2, CREB5, NR4A3, CENPK, HDAC5, ETS2, AREG, JAK3, NR5A2, BMP7 |
| GO:0032844~regulation of homeostatic process                      | 0.023600813 | TF, DRD1, NOS1, CCK, TACR1, STAT5A, AGTR1, CD44, BCL2, AGT, F2, CACNA1G, CA2                                                                                                                                                                                                                                                                          |
| GO:0006915~apoptosis                                              | 0.023929097 | DLC1, PHLPP1, E2F1, E2F2, CCK, GRIK2, ERBB3, TNFSF15, TP63, TNFSF13, KRT20, SFN, SYCP2, GREM1, GRAMD4, MCF2L, BOK, BCL2, C8ORF4, TNFRSF19, DYRK2, UNC5C, BMF, MAGEH1, IL1A, TRAF4, NET1, FGD4, RNF144B, COL4A3, MAGI3, IL6, SGK1, HRK, BIRC7, ESPL1, TNFSF9, BIRC3, AHR, TNS4, TNFSF10, RASGRF2, GADD45G, F2, MUC5AC, GADD45B                         |
| GO:0005200~structural constituent of cytoskeleton                 | 0.02407956  | KRT19, KRT15, PLS1, KRT20, NEFL, TUBA1B, ADD3, BICD1, SPTB, CTNNA2                                                                                                                                                                                                                                                                                    |
| GO:0050714~positive regulation of protein secretion               | 0.024102519 | KCNN4, VEGFC, RBP4, IL6, TNFSF15, IGF2, IL1A                                                                                                                                                                                                                                                                                                          |
| GO:0005625~soluble fraction                                       | 0.02411646  | CAV2, INSL4, TAC3, WISP2, PPP1R3C, ACSL1, STAC, FGB, AGT, SERPINE1, GPX3, EGF, CRYAB, PDE3A, POR, DOCK3, TNFSF10, ADM, NTS, ARRB1, FBLN5, TPPP, F2, LAMC2, CTSB, ALOX5, MERTK, DUSP6                                                                                                                                                                  |
| GO:0070482~response to oxygen levels                              | 0.024147991 | KCNMA1, TF, CCL2, NOS1, EGLN1, MMP14, SHH, ACE, ADM, HMOX1, BCL2, CHRNA7, ANGPT1, ANGPTL4, MB                                                                                                                                                                                                                                                         |
| GO:0007160~cell-matrix adhesion                                   | 0.024794748 | DLC1, CD44, ITGB8, FBLN5, BCL2, AGT, ITGB4, ITGA11, BCAM, NID1, ITGBL1                                                                                                                                                                                                                                                                                |
| GO:0030335~positive regulation of cell migration                  | 0.024794748 | VEGFC, IRS2, DRD1, IL6, ONECUT1, TACR1, BCL2, AGT, ONECUT2, IGF2, F7                                                                                                                                                                                                                                                                                  |
| GO:0001503~ossification                                           | 0.025078849 | CYP24A1, PDLIM7, IGF2, MMP14, COL5A2, SHH, BCL2, KAZALD1, NAB1, FOXC1, COL1A1, BMP7, RUNX2                                                                                                                                                                                                                                                            |
| GO:0000768~syncytium formation by plasma membrane fusion          | 0.025457301 | KCNH1, CAST, NOS1, CD44                                                                                                                                                                                                                                                                                                                               |
| GO:0051129~negative regulation of cellular component organization | 0.025483096 | DLC1, LIMA1, VIL1, SNCA, APOC1, ESPL1, MMP14, SCIN, MAP2, CAPG, TGFB3, DNMT1, TMSB4Y, SPTB, NR1H3                                                                                                                                                                                                                                                     |
| GO:0030036~actin cytoskeleton organization                        | 0.025641764 | DLC1, LIMA1, SHROOM3, PDLIM7, PLEK2, DIAPH3, PRKCI, FMN2, KRT19, CDC42BPG, CDC42EP2, RND1, EPB41L1, EPS8, BCL2, SCIN, ADRA2A, TMSB4Y, RHOF, FGD4, ARHGDI                                                                                                                                                                                              |
| GO:0045923~positive regulation of fatty acid metabolic process    | 0.026149003 | IRS2, HNF4A, AGT, PPARGC1A, NR1H3                                                                                                                                                                                                                                                                                                                     |
| GO:0010038~response to metal ion                                  | 0.026154468 | KCNMA1, S100A16, GATM, SNCA, TAT, AQP3, MT1X, FGG, FGB, BCL2, PLCG2, CACNA1G, TFF1,                                                                                                                                                                                                                                                                   |

|                                                               |             |                                                                                                                                                                                                                                         |
|---------------------------------------------------------------|-------------|-----------------------------------------------------------------------------------------------------------------------------------------------------------------------------------------------------------------------------------------|
|                                                               |             | CA2                                                                                                                                                                                                                                     |
| GO:0007202~activation of phospholipase C activity             | 0.026218317 | AGTR1, P2RY6, DRD1, HRH1, PLCE1, TACR1, AGT, TGM2, NPR3                                                                                                                                                                                 |
| GO:0046546~development of primary male sexual characteristics | 0.026218317 | RBP4, HMGB2, WNT4, BCL2, SOX2, SOX9, SYCP2, SHH, GJB2                                                                                                                                                                                   |
| GO:0010863~positive regulation of phospholipase C activity    | 0.026218317 | AGTR1, P2RY6, DRD1, HRH1, PLCE1, TACR1, AGT, TGM2, NPR3                                                                                                                                                                                 |
| GO:0008544~epidermis development                              | 0.026267731 | TP63, HOXB13, SFN, SOX9, COL5A2, COL5A1, SHH, SCEL, FOXQ1, LAMB3, LAMA3, COL7A1, FLG, BCL2, KRT15, LAMC2, COL1A1, EMP1                                                                                                                  |
| GO:0030029~actin filament-based process                       | 0.026283491 | DLC1, LIMA1, SHROOM3, PDLIM7, PLEK2, DIAPH3, VIL1, PRKCI, FMN2, KRT19, CDC42BPG, CDC42EP2, RND1, EPB41L1, EPS8, BCL2, SCIN, ADRA2A, TMSB4Y, RHOF, FGD4, ARHGDI1B                                                                        |
| GO:0048812~neuron projection morphogenesis                    | 0.027086356 | NRP2, PARD3, CCK, ERBB3, BAIAP2, SHH, CTNNA2, EPHA4, BDNF, EPHA7, ADM, ANK3, BCL2, SEMA3B, UNC5C, ROBO3, BMP7, SLITRK6, BMPR1B, NEFL                                                                                                    |
| GO:0032835~glomerulus development                             | 0.027303231 | PLCE1, BCL2, NID1                                                                                                                                                                                                                       |
| GO:0043296~apical junction complex                            | 0.027501084 | F11R, CGNL1, MAGI3, PARD3, SHROOM3, DSG2, CLDN4, PKP2, PVRL3, DSC2, TJP3, TJP2                                                                                                                                                          |
| GO:0009310~amine catabolic process                            | 0.027738625 | FRRS1, NOS1, DIO2, PRODH2, ASRGL1, TAT, DDAH1, MOXD1, PRODH, GLDC                                                                                                                                                                       |
| GO:0051726~regulation of cell cycle                           | 0.028045464 | E2F1, E2F2, CAV2, STAT5A, KNTC1, SFN, CDC45, TSPYL2, CDKN2C, BCL2, EGF, IL1A, CDC6, CDK1, PLA2G16, BRIP1, PDE3A, ESPL1, IGF2, CDC25A, HNF4A, CCND3, ZWINT, GADD45G, KIF20B, FOXC1, BMP7, GADD45B                                        |
| GO:0042476~odontogenesis                                      | 0.028341466 | ERBB3, TP63, FOXC1, CA2, COL1A1, LHX8, BMP7, SHH                                                                                                                                                                                        |
| GO:0005516~calmodulin binding                                 | 0.028369557 | KCNH1, MYO1A, ADCY1, NOS1, MARCKSL1, MYO1D, CAMKK1, KCNN4, PDE1C, PDE1A, MAP2, MARCKS, NRG1, ADD3, MYO5C                                                                                                                                |
| GO:0001775~cell activation                                    | 0.028502975 | ONECUT1, STAT5A, SNCA, SOX4, TNFSF14, IL15, CX3CL1, IL11, FGG, FGB, AGT, BCL2, ENTPD2, HELLS, RHOH, KIF13B, EXO1, IL6, IGF2, SLAMF7, HDAC5, LAT2, CCND3, F2, PLCG2                                                                      |
| GO:0030182~neuron differentiation                             | 0.028644673 | NRP2, PARD3, NRTN, DRD1, CCK, ERBB3, SOX2, ONECUT2, SHH, BDNF, CD44, ANK3, BCL2, SEMA3B, UNC5C, ROBO3, LHX8, NEFL, KCNMA1, DFNA5, IL6, BAIAP2, PTPRR, PRKCI, EPHA2, CTNNA2, NTRK3, EPHA4, EPHA7, RND1, ADM, MAP2, BMPR1B, BMP7, SLITRK6 |
| GO:0008376~acetylgalactosaminyltransferase activity           | 0.029249203 | GALNT1, GALNT7, GALNT5, B3GALNT1, GALNT4, GALNT9                                                                                                                                                                                        |
| GO:0032813~tumor necrosis factor receptor superfamily binding | 0.029249203 | TNFSF10, TNFSF15, TNFSF14, CD70, TNFSF13, TNFSF9                                                                                                                                                                                        |
| GO:0001936~regulation of endothelial cell proliferation       | 0.029696418 | CAV2, CCL2, APOE, TNFSF15, TNFSF13, SCG2                                                                                                                                                                                                |
| GO:0030168~platelet activation                                | 0.029696418 | FGG, IL6, FGB, F2, ENTPD2, IL11                                                                                                                                                                                                         |
| GO:0006959~humoral immune response                            | 0.029831819 | EXO1, IL6, CCL2, C3, BCL2, C5, CFH, C4BPB, C4BPA, CFD                                                                                                                                                                                   |
| GO:0030955~potassium ion binding                              | 0.030320955 | KCNMA1, KCNH1, FXD2, HCN2, SLC12A8,                                                                                                                                                                                                     |

|                                                             |             |                                                                                                                                                                                                                              |
|-------------------------------------------------------------|-------------|------------------------------------------------------------------------------------------------------------------------------------------------------------------------------------------------------------------------------|
|                                                             |             | SLC12A2, KCNAB2, KCNJ2, KCNK1, KCNK3, KCNQ5, KCNJ6, KCNK5, KCNG1                                                                                                                                                             |
| GO:0043627~response to estrogen stimulus                    | 0.03035127  | KCNMA1, CAV2, KRT19, CRYAB, HMOX1, BCL2, ANGPT1, CA2, TFF1, MMP14, BMP7, SHH                                                                                                                                                 |
| GO:0001658~branching involved in ureteric bud morphogenesis | 0.030601497 | CD44, BCL2, AGT, GREM1, SHH                                                                                                                                                                                                  |
| GO:0060675~ureteric bud morphogenesis                       | 0.030601497 | CD44, BCL2, AGT, GREM1, SHH                                                                                                                                                                                                  |
| GO:0048858~cell projection morphogenesis                    | 0.030734999 | NRP2, PARD3, CCK, ONECUT1, ERBB3, BAIAP2, ONECUT2, SHH, CTNNA2, EPHA4, BDNF, EPHA7, ADM, ANK3, BCL2, SEMA3B, UNC5C, ROBO3, BMP7, SLITRK6, BMPR1B, NEFL                                                                       |
| GO:0060562~epithelial tube morphogenesis                    | 0.030799567 | DLC1, WNT4, SHROOM3, CD44, BCL2, AGT, ZEB2, GREM1, SHH                                                                                                                                                                       |
| GO:0051222~positive regulation of protein transport         | 0.030799567 | KCNN4, VEGFC, RBP4, IL6, TNFSF15, TNFSF14, IGF2, SHH, IL1A                                                                                                                                                                   |
| GO:0044270~nitrogen compound catabolic process              | 0.030799567 | UGT1A6, ALDH1L1, HMOX1, UGT1A4, CDA, PDE3B, DPYD, NT5E, AMPD3, UGT1A1, ENTPD2                                                                                                                                                |
| GO:0001501~skeletal system development                      | 0.030835415 | RBP4, CYP24A1, PDLIM7, TP63, PRRX2, SOX9, SHH, BCL2, COL12A1, ALX4, PAPSS2, RUNX2, MATN3, ARID5B, FBN1, IGF2, NPR3, MMP14, COL5A2, KAZALD1, ETS2, NAB1, FOXC1, COL1A1, BMP7, BMPR1B, IGFBP4                                  |
| GO:0051494~negative regulation of cytoskeleton organization | 0.030984793 | DLC1, LIMA1, SCIN, MAP2, CAPG, VIL1, TMSB4Y, SPTB                                                                                                                                                                            |
| GO:0030246~carbohydrate binding                             | 0.031129019 | FGFR2, GALNT1, KLRC2, CCL2, GALNT7, GALNT5, LGALS9C, SUSD2, LGALS9B, GALNT4, PKD1L2, ZG16B, LPHN2, LPHN3, CD44, APOE, RSPO3, CD22, PLA2R1, FGFBP1, CYR61, ATRNL1, LGALS2, MRC2, COL5A1, TGFBR3, ADAMTS1, LAMC2, BMP7, GALNT9 |
| GO:0006813~potassium ion transport                          | 0.03162077  | KCNH1, KCNMA1, FXYD2, HCN2, SLC12A8, SLC12A2, KCNAB2, KCNJ2, KCNK1, KCNK3, KCNQ5, KCNN4, KCNJ6, KCNK5, ABCC8, KCNG1                                                                                                          |
| GO:0046906~tetrapyrrole binding                             | 0.032038789 | CYP24A1, CYP3A5, PXDN, CYP1B1, NOS1, FA2H, FADS3, CYP4F12, TCN1, CYP4F8, CYP39A1, HMOX1, CYP4F3, MB                                                                                                                          |
| GO:0016337~cell-cell adhesion                               | 0.032633815 | PARD3, CLDN4, GMDS, PCDH10, CTNND2, PCDH9, PCDHGC3, PCDH7, SOX9, CTNNA2, CDH7, CDH15, COL14A1, CD44, DSG2, PKP2, CDH17, BCL2, PVRL3, DSC2, PCDHA13, BMPR1B, CDH10, CEACAM1                                                   |
| GO:0009063~cellular amino acid catabolic process            | 0.033283973 | FRRS1, NOS1, PRODH2, ASRGL1, TAT, DDAH1, MOXD1, PRODH, GLDC                                                                                                                                                                  |
| GO:0016327~apicolateral plasma membrane                     | 0.03332306  | F11R, CGNL1, MAGI3, PARD3, SHROOM3, DSG2, CLDN4, PKP2, PVRL3, DSC2, TJP3, TJP2                                                                                                                                               |
| GO:0014033~neural crest cell differentiation                | 0.033461504 | NRP2, NRTN, ZEB2, FOXC1, SOX9, SHH                                                                                                                                                                                           |
| GO:0014032~neural crest cell development                    | 0.033461504 | NRP2, NRTN, ZEB2, FOXC1, SOX9, SHH                                                                                                                                                                                           |
| GO:0042542~response to hydrogen peroxide                    | 0.033788612 | PXDN, NPTXR, CRYAB, HMOX1, BCL2, GPX3, COL1A1, MB                                                                                                                                                                            |
| GO:0043065~positive regulation of apoptosis                 | 0.035309994 | DLC1, CCK, SOX4, TP63, TNFSF14, CD70, TNFSF13, SFN, MCF2L, CD44, APOE, CDKN2C, BOK, HMOX1, AGT, BCL2, TGM2, TNFRSF19, DYRK2, RARB, NET1, FGD4, KCNMA1, COL4A3, HRK, SLAMF7,                                                  |

|                                                                |             |                                                                                                                                                                                                                                                                                                                                                                                                                                                                                                                                                                                                                                                                                                                                                                                                                                                                                                                                                                                                                                                                                                                                                                                                                                                                                                                                                                                        |
|----------------------------------------------------------------|-------------|----------------------------------------------------------------------------------------------------------------------------------------------------------------------------------------------------------------------------------------------------------------------------------------------------------------------------------------------------------------------------------------------------------------------------------------------------------------------------------------------------------------------------------------------------------------------------------------------------------------------------------------------------------------------------------------------------------------------------------------------------------------------------------------------------------------------------------------------------------------------------------------------------------------------------------------------------------------------------------------------------------------------------------------------------------------------------------------------------------------------------------------------------------------------------------------------------------------------------------------------------------------------------------------------------------------------------------------------------------------------------------------|
|                                                                |             | TNFSF10, EPHA7, NUPR1, RASGRF2, SCIN, MUC5AC, BMP7, PRODH                                                                                                                                                                                                                                                                                                                                                                                                                                                                                                                                                                                                                                                                                                                                                                                                                                                                                                                                                                                                                                                                                                                                                                                                                                                                                                                              |
| GO:0070201~regulation of establishment of protein localization | 0.035398979 | RBP4, IL6, PRKCI, TNFSF15, TNFSF14, IGF2, KRT20, SHH, VEGFC, KCNN4, HNF4A, EGF, IL1A                                                                                                                                                                                                                                                                                                                                                                                                                                                                                                                                                                                                                                                                                                                                                                                                                                                                                                                                                                                                                                                                                                                                                                                                                                                                                                   |
| GO:0042558~pteridine and derivative metabolic process          | 0.035473017 | MOCOS, GPHN, ALDH1L1, FOLR1, MOCS1                                                                                                                                                                                                                                                                                                                                                                                                                                                                                                                                                                                                                                                                                                                                                                                                                                                                                                                                                                                                                                                                                                                                                                                                                                                                                                                                                     |
| GO:0017156~calcium ion-dependent exocytosis                    | 0.035473017 | SCIN, SYT6, RAPGEF4, PCSK4, RIMS3                                                                                                                                                                                                                                                                                                                                                                                                                                                                                                                                                                                                                                                                                                                                                                                                                                                                                                                                                                                                                                                                                                                                                                                                                                                                                                                                                      |
| GO:0010518~positive regulation of phospholipase activity       | 0.035901215 | AGTR1, P2RY6, DRD1, HRH1, PLCE1, TACR1, AGT, TGM2, NPR3                                                                                                                                                                                                                                                                                                                                                                                                                                                                                                                                                                                                                                                                                                                                                                                                                                                                                                                                                                                                                                                                                                                                                                                                                                                                                                                                |
| GO:0051051~negative regulation of transport                    | 0.036089728 | IRS2, NOS1, CRYAB, ERBB3, SNCA, APOC1, IGF2, IL11, INHBB, HNF4A, HMOX1, BCL2, EGF, NR1H3                                                                                                                                                                                                                                                                                                                                                                                                                                                                                                                                                                                                                                                                                                                                                                                                                                                                                                                                                                                                                                                                                                                                                                                                                                                                                               |
| GO:0055067~monovalent inorganic cation homeostasis             | 0.036308371 | KCNMA1, RHCG, AGT, NOX1, SLC9A2, SLC26A9, TMPRSS3                                                                                                                                                                                                                                                                                                                                                                                                                                                                                                                                                                                                                                                                                                                                                                                                                                                                                                                                                                                                                                                                                                                                                                                                                                                                                                                                      |
| GO:0007243~protein kinase cascade                              | 0.036802146 | NRTN, CCL2, ADORA2B, ERBB3, STAT5A, C5, PRKAG2, TNFSF15, TNFSF14, HMOX1, ADRA2A, TNFRSF19, CHRNA7, EGF, STK38L, FGD4, SCG2, CRYAB, BIRC7, IGF2, MAPK10, PLCE1, DOK5, GADD45G, F2, TGFBR3, JAK3, LRRK2, GADD45B, DUSP6                                                                                                                                                                                                                                                                                                                                                                                                                                                                                                                                                                                                                                                                                                                                                                                                                                                                                                                                                                                                                                                                                                                                                                  |
| GO:0019933~cAMP-mediated signaling                             | 0.036804011 | CALCR, S1PR3, ADCY1, DRD1, ADORA2B, ADM, NPY2R, TGM2, RAPGEF4, NPR3, ADRA1D                                                                                                                                                                                                                                                                                                                                                                                                                                                                                                                                                                                                                                                                                                                                                                                                                                                                                                                                                                                                                                                                                                                                                                                                                                                                                                            |
| GO:0016021~integral to membrane                                | 0.037144987 | KLRC2, ADCY1, CADM2, VTCN1, GPR124, SLC9A2, SYT6, SIDT1, MEGF11, AQP3, LPHN2, AGTR1, S1PR3, LPHN3, MALL, CD44, KCNK5, S1PR5, CREB3L1, CHRNA7, HTR1D, MUC13, GRID1, F11R, SLC12A8, ATRNL1, EFNB2, PTPRR, LHFP, SIRPA, PTPRO, PLAUR, TMEM133, AADAC, CCR7, VSIG1, RHCG, LPAR5, KIAA1524, MGAM, FER1L6, MST1R, GCNT4, IL1R2, SLC2A13, CATSPERB, ERBB3, TMEM121, ITGA11, FCGRT, CD70, BDKRB2, KCNJ2, MANSC1, ITGBL1, TMCC2, ACE, LPCAT1, PVRL3, UPK1B, LFNG, MGAT4A, ST6GAL2, BRI3BP, TRPC6, PCDH10, SLAMF7, KCNK1, SYNGR3, EPHA2, KCNK3, ABCG2, NTRK3, EPHA4, GGT5, SEMA6B, EPHA7, KCNJ6, NLGN4Y, EPS8, ATP2A3, PKP2, TGFBR3, AREG, BTBD11, NRP2, KCNH1, SLC16A14, KCNAB2, SUSD2, C14ORF132, PTGES, SLC23A2, CHST13, CEACAM6, CEACAM5, CEACAM1, KCNG1, KCNMA1, ADAM11, GPR176, LPGAT1, CACNG7, CDS1, MMP14, ST6GALNAC1, KIAA1161, SEMA4G, ALG10B, SLC26A9, SGCD, SUSD4, MOSPD1, GRAMD1B, PARD3, FAM69A, NPY2R, GPR64, C5, SLC19A3, XKRX, C2ORF82, IGSF11, FNDC4, ACSL1, BCL2, SLC4A8, CD22, FUT1, ARMCX1, UGT8, PCSK4, FLRT2, PLA2G16, IL6, FADS3, CYP4F12, NPR3, FAAH2, TMPRSS3, GJB1, GJB2, SLC16A2, CDH15, LARGE, SLC16A7, PLSCR4, CDH17, TMTC1, TMTC2, ABCC8, GREB1L, CDH10, SLC22A17, MPZL3, TSPAN1, SLC44A3, GRIK2, PLXNA2, TNFSF15, LRRC4B, TNFSF14, TSPAN7, PDE3B, TSPAN8, TNFSF13, ENPEP, IL15, VIPR1, IL17RD, SLC7A7, SLC2A3, ELOVL4, B3GALNT1, SLC25A29, TMEM98, ROBO3, UNC5C, |

|                                                                                 |             |                                                                                                                                                                                                                                                                                                                                                                                                                                                                                                                                                                                                                                                                                                                                                                                                                                                                                                                                                                                                                                                                                                                                                                                                        |
|---------------------------------------------------------------------------------|-------------|--------------------------------------------------------------------------------------------------------------------------------------------------------------------------------------------------------------------------------------------------------------------------------------------------------------------------------------------------------------------------------------------------------------------------------------------------------------------------------------------------------------------------------------------------------------------------------------------------------------------------------------------------------------------------------------------------------------------------------------------------------------------------------------------------------------------------------------------------------------------------------------------------------------------------------------------------------------------------------------------------------------------------------------------------------------------------------------------------------------------------------------------------------------------------------------------------------|
|                                                                                 |             | SLC4A4, SLC4A3, SPTLC3, FA2H, FIBCD1, MOXD1, LAT2, THBD, VAMP8, DLL4, CPD, VAMP1, SLITRK6, GBP3, EMP1, ABCA8, FGFR2, CAV2, FXYD2, PAM, FGFR4, DRD1, ADORA2B, IFITM3, ITGB4, NKAIN4, ABCA1, CX3CL1, ABCA4, P2RY6, ITGB8, FOLR1, ENTPD7, B3GNT7, FAM189A2, PTPLA, ADRA2A, HEG1, SDR16C5, B3GNT3, SLC30A3, PCDHA13, EGF, ENTPD2, GABRP, B4GALT5, ADAM28, MUC1, HCN2, CACNA2D1, ADAM23, UST, PODXL, SYT11, MRC2, SYT12, GOLIM4, SLC6A14, SLC6A17, REEP2, THSD7A, TNFSF10, GPR37, DIO2, DSG2, SLC7A2, ST8SIA4, CD274, CACNA1G, SLC13A2, TMPO, SCARA3, MERTK, CEND1, SCARA5, ADRA1D, CLDN4, SGPP2, TACR1, SORL1, BCAM, LGR6, SYNGR2, SDC2, CCRL2, EPCAM, FRMD3, TSPAN12, KCNQ5, PLEKHB1, GPC6, DENND5B, SLC43A1, ANO9, CSF2RA, SLC43A2, KIRREL3, PARM1, GABRG3, NRXN2, CHST2, PCDH9, WLS, MAN1A1, PCDH7, UGT1A1, MUC3A, NPTXR, CHRM3, DGAT2, CD82, PLLP, UGT2B15, GALNT9, TM4SF4, CALCR, GALNT1, GALNT7, MAL2, GALNT5, GALNT4, PCDHGC3, GPRC5A, GRAMD4, PKD1L2, UGT1A6, CDH7, HRH1, PRRG4, UGT1A4, RNF128, TNFRSF19, PLA2R1, PTPRB, RNF144B, TMEM45B, SLC12A2, NOX1, TSPAN13, SLC10A7, TMEM52, GDPD5, TNFSF9, SLC17A7, FRRS1, KCNN4, CYP4F8, TMEM47, SLC17A3, SLC17A1, DSC2, CYP4F3, TMEM86A, BMPR1B, GPR115 |
| GO:0031328~positive regulation of cellular biosynthetic process                 | 0.037421909 | E2F1, STAT5A, TP63, SHH, IL11, BHLHA15, APOE, HMOX1, FOXF2, RARB, ALX4, DDAH1, IL1A, IRS2, MECOM, PPARGC1A, AHR, HNF4A, FOXC1, SMARCA2, HMGB2, DRD1, ADORA2B, ABLIM3, ONECUT2, SOX2, SOX4, EHF, ABCA1, SOX9, HRH1, AGT, DYRK2, TCF4, RUNX2, NR1H3, KLF5, IL6, IKZF2, MAML2, IGF2, CREB5, NR4A3, CENPK, HDAC5, ETS2, AREG, JAK3, NR5A2, BMP7                                                                                                                                                                                                                                                                                                                                                                                                                                                                                                                                                                                                                                                                                                                                                                                                                                                            |
| GO:0031399~regulation of protein modification process                           | 0.037558948 | DLC1, CCK, SNCA, PRKAG2, ZEB2, BDKRB2, IL11, AGT, BCL2, RAPGEF4, EGF, FGD4, CDK1, IL6, BIRC7, IGF2, PPARGC1A, VEGFC, HNF4A, CCND3, HPX, F2, DNMT1, LRRK2, BMP7                                                                                                                                                                                                                                                                                                                                                                                                                                                                                                                                                                                                                                                                                                                                                                                                                                                                                                                                                                                                                                         |
| GO:0048584~positive regulation of response to stimulus                          | 0.038046072 | IL6, ADORA2B, C3, STAT5A, C5, C4BPB, IGF2, CX3CL1, C4BPA, F7, IL15, NTRK3, AGTR1, LAT2, HPX, AGT, PLCG2, TGM2, CFH, CFD, SCG2                                                                                                                                                                                                                                                                                                                                                                                                                                                                                                                                                                                                                                                                                                                                                                                                                                                                                                                                                                                                                                                                          |
| GO:0045944~positive regulation of transcription from RNA polymerase II promoter | 0.038047833 | E2F1, HMGB2, STAT5A, ABLIM3, SOX2, ONECUT2, TP63, SOX9, SHH, IL11, BHLHA15, RARB, ALX4, RUNX2, NR1H3, IL6, IKZF2, MAML2, NR4A3, MECOM, CENPK, PPARGC1A, AHR, HDAC5, HNF4A, FOXC1, JAK3, BMP7, NR5A2, SMARCA2                                                                                                                                                                                                                                                                                                                                                                                                                                                                                                                                                                                                                                                                                                                                                                                                                                                                                                                                                                                           |
| GO:0000902~cell morphogenesis                                                   | 0.038129851 | S100A4, NRP2, PARD3, CCK, SHROOM3, ONECUT1, ERBB3, ONECUT2, SOX9, SHH, BDNF, ANK3, BCL2, SEMA3B, UNC5C, ROBO3, NEFL, NFATC1, BAIAP2, PRKCI, CTNNA2, EPHA4, EPHA7, ADM, TGFBR3, MAP7, BMP7, SLITRK6, BMPR1B                                                                                                                                                                                                                                                                                                                                                                                                                                                                                                                                                                                                                                                                                                                                                                                                                                                                                                                                                                                             |

|                                                                                                                                                                        |             |                                                                                                                                                                                                                                                                                                                                         |
|------------------------------------------------------------------------------------------------------------------------------------------------------------------------|-------------|-----------------------------------------------------------------------------------------------------------------------------------------------------------------------------------------------------------------------------------------------------------------------------------------------------------------------------------------|
| GO:0044271~nitrogen compound biosynthetic process                                                                                                                      | 0.038154896 | MOCOS, NAMPT, ADCY1, RP2, SNCA, PRKAG2, GPHN, CDA, GUCA2B, ATP6V0D2, NT5E, MOCS1, DDC, NMNAT2, NOS1, PADI2, AK5, CPS1, AMPD3, ADM, ATP2A3, RRM2, RRM1, PRODH2, QPRT, DPYD, PRODH                                                                                                                                                        |
| GO:0051047~positive regulation of secretion                                                                                                                            | 0.038433128 | INHBB, KCNN4, VEGFC, RBP4, IL6, ADORA2B, TACR1, SCIN, SNCA, TNFSF15, IGF2, IL1A                                                                                                                                                                                                                                                         |
| GO:0033135~regulation of peptidyl-serine phosphorylation                                                                                                               | 0.038804973 | IL6, BCL2, BDKRB2, IL11                                                                                                                                                                                                                                                                                                                 |
| GO:0045940~positive regulation of steroid metabolic process                                                                                                            | 0.038804973 | AGTR1, APOE, AGT, APOC1                                                                                                                                                                                                                                                                                                                 |
| GO:0006949~syncytium formation                                                                                                                                         | 0.038804973 | KCNH1, CAST, NOS1, CD44                                                                                                                                                                                                                                                                                                                 |
| GO:0010962~regulation of glucan biosynthetic process                                                                                                                   | 0.038804973 | IRS2, PPP1R3C, IGF2, DYRK2                                                                                                                                                                                                                                                                                                              |
| GO:0005979~regulation of glycogen biosynthetic process                                                                                                                 | 0.038804973 | IRS2, PPP1R3C, IGF2, DYRK2                                                                                                                                                                                                                                                                                                              |
| GO:0032885~regulation of polysaccharide biosynthetic process                                                                                                           | 0.038804973 | IRS2, PPP1R3C, IGF2, DYRK2                                                                                                                                                                                                                                                                                                              |
| GO:0055114~oxidation reduction                                                                                                                                         | 0.039269141 | ACOX2, CYP3A5, CYP24A1, PAM, PXDN, ALDH1L1, CYP1B1, KCNAB2, UTY, HSD17B14, SNCA, EGLN1, ALDH3A1, GLDC, GPX2, CYP39A1, HMOX1, P4HA3, GPX3, SDR16C5, LOX, LOXL2, PCSK4, GLRX, KDM5D, NOS1, FA2H, MICAL2, NOX1, FADS3, CYP4F12, PPARGC1A, POR, MOXD1, FRRS1, CYP4F8, DIO2, NXN, F5, RRM2, RRM1, AKR1B1, PRODH2, CYP4F3, DPYD, ALOX5, PRODH |
| GO:0043549~regulation of kinase activity                                                                                                                               | 0.039357191 | ADCY1, DRD1, PARD3, CCK, ADORA2B, C5, PRKAG2, TNFSF15, ZEB2, SFN, DGKA, TSPYL2, APOE, CDKN2C, ADRA2A, CHRNA7, EGF, FGD4, CDC6, RBL1, BIRC7, PKIB, IGF2, CDC25A, PLCE1, CCND3, GADD45G, GADD45B, DUSP6                                                                                                                                   |
| GO:0010669~epithelial structure maintenance                                                                                                                            | 0.039470462 | RBP4, MUC3A, TFF1                                                                                                                                                                                                                                                                                                                       |
| GO:0060347~heart trabecula formation                                                                                                                                   | 0.039470462 | RBP4, TGFB3, ADAMTS1                                                                                                                                                                                                                                                                                                                    |
| GO:0030277~maintenance of gastrointestinal epithelium                                                                                                                  | 0.039470462 | RBP4, MUC3A, TFF1                                                                                                                                                                                                                                                                                                                       |
| GO:0007588~excretion                                                                                                                                                   | 0.039890399 | KCNMA1, ADORA2B, HMOX1, TACR1, AGT, KCNK5, GUCA2B, AQP3                                                                                                                                                                                                                                                                                 |
| GO:0030835~negative regulation of actin filament depolymerization                                                                                                      | 0.040766632 | LIMA1, SCIN, CAPG, VIL1, SPTB                                                                                                                                                                                                                                                                                                           |
| GO:0008083~growth factor activity                                                                                                                                      | 0.041095663 | IL6, NRTN, IGF2, VGF, IL11, INHBB, VEGFC, TYMP, BDNF, PPBP, INHBE, AGT, TFF1, AREG, EGF, BMP7                                                                                                                                                                                                                                           |
| GO:0048667~cell morphogenesis involved in neuron differentiation                                                                                                       | 0.041450383 | NRP2, PARD3, CCK, ERBB3, BAIAP2, SHH, CTNNA2, EPHA4, BDNF, EPHA7, ANK3, BCL2, SEMA3B, ROBO3, UNC5C, BMP7, SLITRK6, BMPR1B, NEFL                                                                                                                                                                                                         |
| GO:0031091~platelet alpha granule                                                                                                                                      | 0.041473018 | VEGFC, FGG, F5, PPBP, FGB, SERPINF2, EGF, CFD                                                                                                                                                                                                                                                                                           |
| GO:0010517~regulation of phospholipase activity                                                                                                                        | 0.041544065 | AGTR1, P2RY6, DRD1, HRH1, PLCE1, TACR1, AGT, TGM2, NPR3                                                                                                                                                                                                                                                                                 |
| GO:0016715~oxidoreductase activity, acting on paired donors, with incorporation or reduction of molecular oxygen, reduced ascorbate as one donor, and incorporation of | 0.041643473 | FRRS1, PAM, MOXD1                                                                                                                                                                                                                                                                                                                       |

|                                                             |             |                                                                                                                                                                                                                                                                                                                                                                                                                                                                                                                                                                                                                                                                                                                                                                                                                                                       |
|-------------------------------------------------------------|-------------|-------------------------------------------------------------------------------------------------------------------------------------------------------------------------------------------------------------------------------------------------------------------------------------------------------------------------------------------------------------------------------------------------------------------------------------------------------------------------------------------------------------------------------------------------------------------------------------------------------------------------------------------------------------------------------------------------------------------------------------------------------------------------------------------------------------------------------------------------------|
| one atom of oxygen                                          |             |                                                                                                                                                                                                                                                                                                                                                                                                                                                                                                                                                                                                                                                                                                                                                                                                                                                       |
| GO:0031016~pancreas development                             | 0.041845704 | IL6, ONECUT1, ONECUT2, PDE3B, SOX4, SHH                                                                                                                                                                                                                                                                                                                                                                                                                                                                                                                                                                                                                                                                                                                                                                                                               |
| GO:0032880~regulation of protein localization               | 0.041957408 | RBP4, IL6, PRKCI, TNFSF15, TNFSF14, IGF2, KRT20, SHH, KCNN4, VEGFC, HNF4A, BCL2, EGF, IL1A                                                                                                                                                                                                                                                                                                                                                                                                                                                                                                                                                                                                                                                                                                                                                            |
| GO:0010647~positive regulation of cell communication        | 0.042467775 | CAV2, DRD1, CCL2, ERBB3, GRIK2, TACR1, SNCA, SOX2, SOX4, TP63, ZEB2, PRRX2, IL11, HMOX1, AGT, TGM2, EGF, IL6, IGF2, WLS, F7, ECM1, IKBKE, TNFSF10, HPX, KCP, BMP7                                                                                                                                                                                                                                                                                                                                                                                                                                                                                                                                                                                                                                                                                     |
| GO:0020037~heme binding                                     | 0.042635113 | CYP24A1, CYP3A5, PXDN, CYP1B1, NOS1, FA2H, FADS3, CYP4F12, CYP4F8, CYP39A1, HMOX1, CYP4F3, MB                                                                                                                                                                                                                                                                                                                                                                                                                                                                                                                                                                                                                                                                                                                                                         |
| GO:0005641~nuclear envelope lumen                           | 0.042858934 | PTGES, BCHE, ALOX5                                                                                                                                                                                                                                                                                                                                                                                                                                                                                                                                                                                                                                                                                                                                                                                                                                    |
| GO:0007166~cell surface receptor linked signal transduction | 0.042944329 | ADCY1, NRTN, GPR124, GRIK2, PLXNA2, STAT5A, VIPR1, SHH, LPHN2, LPHN3, S1PR3, AGTR1, WNT4, APOE, BHLHA15, S1PR5, RAPGEF4, HTR1D, WNT6, CFD, IRS2, STC2, ATRNL1, BAIAP2, VEGFC, CCR7, PLCE1, LAT2, PPBP, LPAR5, DLL4, F2, ADAMTS1, MST1R, FGFR2, FGFR4, DRD1, CCL2, ADORA2B, ERBB3, ITGA11, ITGB4, SOX4, CXXC4, BDKRB2, ABCA1, ITGBL1, P2RY6, ITGB8, ADRA2A, CDA, EGF, ENTPD2, DIXDC1, ADAM23, MAML2, EPHA2, NTRK3, EPHA4, EPHA7, LAMA3, GPR37, NXN, EPS8, CD274, PLCG2, TGFBR3, AREG, MERTK, BMP7, ADRA1D, NXPH4, TACR1, TP63, LGR6, CCRL2, HEY1, RSPO3, ANGPT1, CEACAM1, GABRG3, ADAM11, GPR176, ARID5B, TLE3, CHRM3, ADM, DOK5, CNTN1, FOXC1, CALCR, PARD3, CCK, CXCL5, USP9Y, C3, CXCL3, NPY2R, GPR64, C5, GPRC5A, PKD1L2, TAC3, PHIP, DGKA, HRH1, AGT, TGM2, PIK3R3, COL4A3, SLC12A2, IGF2, NPR3, BIRC3, ID1, GFRA1, JAK3, IGF1BP1, BMPR1B, GPR115 |
| GO:0045859~regulation of protein kinase activity            | 0.043359009 | ADCY1, DRD1, PARD3, CCK, ADORA2B, C5, PRKAG2, TNFSF15, ZEB2, SFN, DGKA, TSPYL2, APOE, CDKN2C, ADRA2A, CHRNA7, EGF, FGD4, CDC6, BIRC7, PKIB, IGF2, CDC25A, PLCE1, CCND3, GADD45G, GADD45B, DUSP6                                                                                                                                                                                                                                                                                                                                                                                                                                                                                                                                                                                                                                                       |
| GO:0015294~solute:cation symporter activity                 | 0.043433533 | SLC17A7, SLC2A13, SLC12A2, SLC17A3, SLC23A2, SLC2A3, SLC6A14, SLC10A7, SLC13A2, SLC6A17, SLC4A4                                                                                                                                                                                                                                                                                                                                                                                                                                                                                                                                                                                                                                                                                                                                                       |
| GO:0007610~behavior                                         | 0.043514062 | NRP2, ADCY1, DRD1, CCK, CCL2, CXCL5, GRIK2, TACR1, NPY2R, CXCL3, SNCA, C5, CTNND2, CX3CL1, CCRL2, TYMP, BDNF, BCHE, BCL2, AGT, CHRNA7, SEPP1, ROBO3, LHX8, SCG2, CYR61, KCNMA1, IL6, NR4A3, PARK2, PLAUR, FOXP2, EPHA4, CCR7, PPBP, EPS8                                                                                                                                                                                                                                                                                                                                                                                                                                                                                                                                                                                                              |
| GO:0051272~positive regulation of cell motion               | 0.044110664 | VEGFC, IRS2, DRD1, IL6, ONECUT1, TACR1, BCL2, AGT, ONECUT2, IGF2, F7                                                                                                                                                                                                                                                                                                                                                                                                                                                                                                                                                                                                                                                                                                                                                                                  |
| GO:0031589~cell-substrate adhesion                          | 0.044110664 | DLC1, CD44, ITGB8, FBLN5, BCL2, AGT, ITGB4, ITGA11, BCAM, NID1, ITGBL1                                                                                                                                                                                                                                                                                                                                                                                                                                                                                                                                                                                                                                                                                                                                                                                |
| GO:0016208~AMP binding                                      | 0.044606472 | HCN2, PDE1C, PRKAG2, PDE10A, RAPGEF4                                                                                                                                                                                                                                                                                                                                                                                                                                                                                                                                                                                                                                                                                                                                                                                                                  |
| GO:0032990~cell part morphogenesis                          | 0.045889018 | NRP2, PARD3, CCK, ONECUT1, ERBB3, BAIAP2,                                                                                                                                                                                                                                                                                                                                                                                                                                                                                                                                                                                                                                                                                                                                                                                                             |

|                                                                          |             |                                                                                                                                                                                                                                                                                                                                                                                                          |
|--------------------------------------------------------------------------|-------------|----------------------------------------------------------------------------------------------------------------------------------------------------------------------------------------------------------------------------------------------------------------------------------------------------------------------------------------------------------------------------------------------------------|
|                                                                          |             | ONECUT2, SHH, CTNNA2, EPHA4, BDNF, EPHA7, ADM, ANK3, BCL2, SEMA3B, UNC5C, ROBO3, BMP7, SLITRK6, BMPR1B, NEFL                                                                                                                                                                                                                                                                                             |
| GO:0010604~positive regulation of macromolecule metabolic process        | 0.046233918 | DLC1, E2F1, STAT5A, PRKAG2, SNCA, TP63, TNFSF13, SHH, IL11, AGTR1, APOE, BHLHA15, HMOX1, FOXF2, RARB, ALX4, IL1A, CDK1, IRS2, MECOM, PPARGC1A, AHR, VEGFC, HNF4A, CCND3, F2, FOXC1, LRRK2, SMARCA2, HMGB2, CCK, ABLIM3, SOX2, ONECUT2, SOX4, EHF, SOX9, AGT, BCL2, DYRK2, TCF4, RUNX2, NR1H3, KLF5, IL6, IKZF2, NOX1, MAML2, CREB5, IGF2, NR4A3, CENPK, HDAC5, HPX, ETS2, DNMT1, JAK3, AREG, NR5A2, BMP7 |
| GO:0048168~regulation of neuronal synaptic plasticity                    | 0.046471276 | DRD1, GRIK2, APOE, AGT, SNCA, VGF                                                                                                                                                                                                                                                                                                                                                                        |
| GO:0019218~regulation of steroid metabolic process                       | 0.046471276 | KCNMA1, AGTR1, APOE, STAT5A, AGT, APOC1                                                                                                                                                                                                                                                                                                                                                                  |
| GO:0048730~epidermis morphogenesis                                       | 0.046483164 | FOXQ1, BCL2, TP63, COL1A1, SHH                                                                                                                                                                                                                                                                                                                                                                           |
| GO:0045669~positive regulation of osteoblast differentiation             | 0.046483164 | IL6, PDLIM7, BMP7, BMPR1B, RUNX2                                                                                                                                                                                                                                                                                                                                                                         |
| GO:0010594~regulation of endothelial cell migration                      | 0.046483164 | HDAC5, VEGFC, APOE, AGT, DLL4                                                                                                                                                                                                                                                                                                                                                                            |
| GO:0030810~positive regulation of nucleotide biosynthetic process        | 0.046567396 | DRD1, ADORA2B, APOE, ABCA1                                                                                                                                                                                                                                                                                                                                                                               |
| GO:0030804~positive regulation of cyclic nucleotide biosynthetic process | 0.046567396 | DRD1, ADORA2B, APOE, ABCA1                                                                                                                                                                                                                                                                                                                                                                               |
| GO:0006957~complement activation, alternative pathway                    | 0.046567396 | C3, C5, CFH, CFD                                                                                                                                                                                                                                                                                                                                                                                         |
| GO:0042304~regulation of fatty acid biosynthetic process                 | 0.046567396 | HNF4A, AGT, APOC1, NR1H3                                                                                                                                                                                                                                                                                                                                                                                 |
| GO:0046847~filopodium assembly                                           | 0.046567396 | DNM3, BAIAP2, ITGB4, FGD4                                                                                                                                                                                                                                                                                                                                                                                |
| GO:0030801~positive regulation of cyclic nucleotide metabolic process    | 0.046567396 | DRD1, ADORA2B, APOE, ABCA1                                                                                                                                                                                                                                                                                                                                                                               |
| GO:0001662~behavioral fear response                                      | 0.046567396 | DRD1, CCK, GRIK2, BCL2                                                                                                                                                                                                                                                                                                                                                                                   |
| GO:0032881~regulation of polysaccharide metabolic process                | 0.046567396 | IRS2, PPP1R3C, IGF2, DYRK2                                                                                                                                                                                                                                                                                                                                                                               |
| GO:0002209~behavioral defense response                                   | 0.046567396 | DRD1, CCK, GRIK2, BCL2                                                                                                                                                                                                                                                                                                                                                                                   |
| GO:0045981~positive regulation of nucleotide metabolic process           | 0.046567396 | DRD1, ADORA2B, APOE, ABCA1                                                                                                                                                                                                                                                                                                                                                                               |
| GO:0008217~regulation of blood pressure                                  | 0.049494271 | AGTR1, ACE, RENBP, HMOX1, TACR1, AGT, NOX1, BDKRB2, NPR3, GUCA2B, ADRA1D                                                                                                                                                                                                                                                                                                                                 |
| GO:0007398~ectoderm development                                          | 0.049595895 | TP63, HOXB13, SFN, SOX9, COL5A2, COL5A1, SHH, SCEL, FOXQ1, LAMB3, LAMA3, COL7A1, FLG, BCL2, KRT15, LAMC2, COL1A1, EMP1                                                                                                                                                                                                                                                                                   |
| GO:0030552~cAMP binding                                                  | 0.050059738 | HCN2, PDE1C, PDE10A, RAPGEF4                                                                                                                                                                                                                                                                                                                                                                             |
| GO:0030425~dendrite                                                      | 0.050303854 | DNM3, DRD1, CCK, NOS1, GRIK2, TACR1, TP63, KCNJ2, CAMK2N1, EPHA7, CHRM3, APOE, MAP2, CACNA1G, ALOX5, LRRK2                                                                                                                                                                                                                                                                                               |
| GO:0051223~regulation of protein transport                               | 0.050502267 | KCNN4, VEGFC, RBP4, IL6, HNF4A, TNFSF15, TNFSF14, IGF2, KRT20, EGF, SHH, IL1A                                                                                                                                                                                                                                                                                                                            |
| GO:0007423~sensory organ development                                     | 0.050579885 | KCNMA1, RBP4, DFNA5, ERBB3, CRYAB, SOX2, PRKCI, NR4A3, PRRX2, COL5A2, COL5A1, SHH,                                                                                                                                                                                                                                                                                                                       |



|                                                                               |             |                                                                                                                                                                                                                                                                                                                               |
|-------------------------------------------------------------------------------|-------------|-------------------------------------------------------------------------------------------------------------------------------------------------------------------------------------------------------------------------------------------------------------------------------------------------------------------------------|
|                                                                               |             | FOXP2, BDNF, BCL2, PVRL3, FOXC1, RARB, BMP7, BMPR1B                                                                                                                                                                                                                                                                           |
| GO:0045597~positive regulation of cell differentiation                        | 0.050579885 | IL6, PDLIM7, STAT5A, SOX2, IGF2, SHH, NTRK3, AGTR1, VEGFC, BDNF, METRN, AGT, BCL2, HLX, SCIN, CA2, BMPR1B, BMP7, RUNX2, NEFL                                                                                                                                                                                                  |
| GO:0007626~locomotory behavior                                                | 0.050728483 | NRP2, KCNMA1, IL6, DRD1, CCL2, CXCL5, NPY2R, CXCL3, C5, SNCA, PARK2, CX3CL1, PLAUR, CCRL2, EPHA4, TYMP, CCR7, PPBP, EPS8, ROBO3, SEPP1, CYR61, SCG2                                                                                                                                                                           |
| GO:0004713~protein tyrosine kinase activity                                   | 0.051348675 | FGFR2, NRP2, FRK, CAV2, FGFR4, ERBB3, FES, EPHA2, NTRK3, EPHA4, EPHA7, MLKL, JAK3, DYRK2, MST1R, MERTK                                                                                                                                                                                                                        |
| GO:0008286~insulin receptor signaling pathway                                 | 0.051388474 | PHIP, IRS2, BAIAP2, IGF2, IGFBP1, PIK3R3                                                                                                                                                                                                                                                                                      |
| GO:0033500~carbohydrate homeostasis                                           | 0.051895284 | RBP4, BHLHA15, SERPINE1, PDE3B, IGF2, VGF, PPARGC1A                                                                                                                                                                                                                                                                           |
| GO:0042593~glucose homeostasis                                                | 0.051895284 | RBP4, BHLHA15, SERPINE1, PDE3B, IGF2, VGF, PPARGC1A                                                                                                                                                                                                                                                                           |
| GO:0031100~organ regeneration                                                 | 0.052621297 | CCL2, ADM, ANGPT1, NR4A3, GAS6                                                                                                                                                                                                                                                                                                |
| GO:0045766~positive regulation of angiogenesis                                | 0.052621297 | CHRNA7, TNFSF13, DDAH1, IL1A, ANGPTL4                                                                                                                                                                                                                                                                                         |
| GO:0045893~positive regulation of transcription, DNA-dependent                | 0.052929721 | E2F1, HMGB2, STAT5A, ABLIM3, SOX2, ONECUT2, SOX4, TP63, EHF, SOX9, SHH, IL11, BHLHA15, FOXF2, RARB, TCF4, ALX4, RUNX2, NR1H3, IL6, IKZF2, MAML2, CREB5, NR4A3, CENPK, MECOM, PPARGC1A, AHR, HDAC5, HNF4A, ETS2, FOXC1, JAK3, BMP7, NR5A2, SMARCA2                                                                             |
| GO:0007187~G-protein signaling, coupled to cyclic nucleotide second messenger | 0.053191283 | CALCR, S1PR3, ADCY1, DRD1, CCL2, ADORA2B, AGT, NPY2R, NPR3, VIPR1, HTR1D, ADRA1D                                                                                                                                                                                                                                              |
| GO:0051189~prosthetic group metabolic process                                 | 0.05326563  | MOCOS, GPHN, MOCS1                                                                                                                                                                                                                                                                                                            |
| GO:0019720~Mo-molybdopterin cofactor metabolic process                        | 0.05326563  | MOCOS, GPHN, MOCS1                                                                                                                                                                                                                                                                                                            |
| GO:0043545~molybdopterin cofactor metabolic process                           | 0.05326563  | MOCOS, GPHN, MOCS1                                                                                                                                                                                                                                                                                                            |
| GO:0032324~molybdopterin cofactor biosynthetic process                        | 0.05326563  | MOCOS, GPHN, MOCS1                                                                                                                                                                                                                                                                                                            |
| GO:0006777~Mo-molybdopterin cofactor biosynthetic process                     | 0.05326563  | MOCOS, GPHN, MOCS1                                                                                                                                                                                                                                                                                                            |
| GO:0031410~cytoplasmic vesicle                                                | 0.053492051 | CALCR, CAV2, TF, PAM, RAB3B, CXXC4, SYT6, ABCA1, ENPEP, VGF, GPRC5A, SHH, ANXA6, AP1S3, BDNF, NPTX1, FGG, MALL, FGB, ENTPD7, TFF3, SLC30A3, RAB27B, CFD, EGF, PCSK4, ARHGDIB, NCALD, SYT11, SYT12, GOLIM4, MMP14, SYNGR3, SLC17A7, SH3BP4, VEGFC, RHCG, PPBP, NTS, F5, FLG, SERPINF2, CAPG, CTSD, ADAMTS1, CTSB, VAMP1, LRRK2 |
| GO:0050905~neuromuscular process                                              | 0.054142423 | KCNMA1, DRD1, SOX2, USH1C, NR4A3, PARK2, NEFL, CTNNA2                                                                                                                                                                                                                                                                         |
| GO:0031401~positive regulation of protein modification process                | 0.054938546 | DLC1, CDK1, IL6, CCK, PRKAG2, IGF2, PPARGC1A, IL11, VEGFC, CCND3, HPX, BCL2, AGT, F2, DNMT1, BMP7, LRRK2                                                                                                                                                                                                                      |
| GO:0032403~protein complex binding                                            | 0.054961927 | PDP1, COL4A3, ADAM11, IRS2, ADAM23, FCGRT,                                                                                                                                                                                                                                                                                    |

|                                                                      |             |                                                                                                                                                                                                                                                   |
|----------------------------------------------------------------------|-------------|---------------------------------------------------------------------------------------------------------------------------------------------------------------------------------------------------------------------------------------------------|
|                                                                      |             | IGF2, EDIL3, CPS1, COL5A1, PHIP, LAMB3, NPTXR, DOK5, FBLN5, TGFBI, DOK7, PCNA                                                                                                                                                                     |
| GO:0043535~regulation of blood vessel endothelial cell migration     | 0.055030239 | HDAC5, VEGFC, APOE, DLL4                                                                                                                                                                                                                          |
| GO:0030035~microspike assembly                                       | 0.055030239 | DNM3, BAIAP2, ITGB4, FGD4                                                                                                                                                                                                                         |
| GO:0060350~endochondral bone morphogenesis                           | 0.055030239 | NAB1, COL1A1, SOX9, RUNX2                                                                                                                                                                                                                         |
| GO:0030539~male genitalia development                                | 0.055030239 | SOX2, SYCP2, SHH, GJB2                                                                                                                                                                                                                            |
| GO:0022612~gland morphogenesis                                       | 0.055030239 | ERBB3, BCL2, BMP7, SHH                                                                                                                                                                                                                            |
| GO:0006270~DNA replication initiation                                | 0.055030239 | CDC45, MCM4, MCM5, MCM6                                                                                                                                                                                                                           |
| GO:0009100~glycoprotein metabolic process                            | 0.055615209 | MGAT4A, GCNT4, GALNT1, ST6GAL2, GALNT7, TSPAN7, TSPAN8, EDEM3, ST6GALNAC1, LARGE, ST8SIA4, B3GNT7, B3GALNT1, CHST13, FUT1, B3GNT3, GALNT9, TM4SF4                                                                                                 |
| GO:0006140~regulation of nucleotide metabolic process                | 0.055974571 | CALCR, S1PR3, ADCY1, DRD1, ADORA2B, APOE, NPY2R, ADRA2A, CDA, ABCA1, NPR3, GUCA2B                                                                                                                                                                 |
| GO:0006814~sodium ion transport                                      | 0.056031729 | FXYD2, HCN2, SGK1, SLC12A2, SLC9A2, SLC10A7, SLC17A7, SLC17A3, SLC23A2, SLC17A1, SLC4A8, SLC13A2, SLC4A4                                                                                                                                          |
| GO:0033043~regulation of organelle organization                      | 0.056033221 | DLC1, CAV2, LIMA1, TACR1, VIL1, SNCA, IGF2, ESPL1, PPARGC1A, CDC42EP2, SCIN, MAP2, CAPG, KIF20B, DNMT1, TMSB4Y, EGF, IL1A, SPTB                                                                                                                   |
| GO:0047555~3',5'-cyclic-GMP phosphodiesterase activity               | 0.056137568 | PDE11A, PDE9A, PDE10A                                                                                                                                                                                                                             |
| GO:0016725~oxidoreductase activity, acting on CH or CH2 groups       | 0.056137568 | ACOX2, RRM2, RRM1                                                                                                                                                                                                                                 |
| GO:0006638~neutral lipid metabolic process                           | 0.056340287 | PLCE1, DGAT2, APOE, SNCA, APOC1, CPS1, NR1H3                                                                                                                                                                                                      |
| GO:0019210~kinase inhibitor activity                                 | 0.056910737 | CDKN2C, PRKAG2, PKIB, SFN, CAMK2N1, RHOH                                                                                                                                                                                                          |
| GO:0030141~secretory granule                                         | 0.057329913 | CALCR, PAM, TF, VGF, VEGFC, FGG, NPTX1, F5, NTS, PPBP, SERPINF2, FGB, TFF3, EGF, CFD, RAB27B, PCSK4                                                                                                                                               |
| GO:0005577~fibrinogen complex                                        | 0.057741807 | FGG, FGB, FGL1                                                                                                                                                                                                                                    |
| GO:0032270~positive regulation of cellular protein metabolic process | 0.058214579 | DLC1, CDK1, IL6, CCK, PRKAG2, IGF2, PPARGC1A, IL11, AGTR1, VEGFC, CCND3, HPX, APOE, BCL2, AGT, F2, DNMT1, BMP7, LRRK2, NR1H3                                                                                                                      |
| GO:0051254~positive regulation of RNA metabolic process              | 0.058296337 | E2F1, HMGB2, STAT5A, ABLIM3, SOX2, ONECUT2, SOX4, TP63, EHF, SOX9, SHH, IL11, BHLHA15, FOXF2, RARB, TCF4, ALX4, RUNX2, NR1H3, IL6, IKZF2, MAML2, CREB5, NR4A3, CENPK, MECOM, PPARGC1A, AHR, HDAC5, HNF4A, ETS2, FOXC1, JAK3, BMP7, NR5A2, SMARCA2 |
| GO:0051259~protein oligomerization                                   | 0.058524473 | CAV2, CRYAB, HR, TP63, BIRC3, GJB1, RRM2, GPX3, RRM1, TGM2, CDA, QPRT, ANGPT1, SKIL, SCARA5, ANGPTL4                                                                                                                                              |
| GO:0007156~homophilic cell adhesion                                  | 0.058736368 | PCDH10, PCDH9, PCDHGC3, PCDH7, CDH7, CDH15, DSG2, CDH17, PVRL3, DSC2, PCDHA13, CEACAM1, CDH10                                                                                                                                                     |
| GO:0030834~regulation of actin filament depolymerization             | 0.059177709 | LIMA1, SCIN, CAPG, VIL1, SPTB                                                                                                                                                                                                                     |
| GO:0042330~taxis                                                     | 0.05977218  | NRP2, IL6, CCL2, CXCL5, CXCL3, C5, CX3CL1, PLAUR, CCRL2, TYMP, CCR7, PPBP, ROBO3, CYR61, SCG2                                                                                                                                                     |

|                                                                       |             |                                                                                                                                                                                                                                                                                                                       |
|-----------------------------------------------------------------------|-------------|-----------------------------------------------------------------------------------------------------------------------------------------------------------------------------------------------------------------------------------------------------------------------------------------------------------------------|
| GO:0006935~chemotaxis                                                 | 0.05977218  | NRP2, IL6, CCL2, CXCL5, CXCL3, C5, CX3CL1, PLAUR, CCRL2, TYMP, CCR7, PPBP, ROBO3, CYR61, SCG2                                                                                                                                                                                                                         |
| GO:0051338~regulation of transferase activity                         | 0.060261604 | ADCY1, DRD1, PARD3, CCK, ADORA2B, C5, PRKAG2, TNFSF15, ZEB2, SFN, DGKA, TSPYL2, APOE, CDKN2C, ADRA2A, CHRNA7, EGF, FGD4, CDC6, RBL1, BIRC7, PKIB, IGF2, CDC25A, PLCE1, CCND3, GADD45G, GADD45B, DUSP6                                                                                                                 |
| GO:0043254~regulation of protein complex assembly                     | 0.060420236 | CAV2, CDC42EP2, CCK, TPPP, SCIN, CAPG, VIL1, TMSB4Y, AHR, SPTB                                                                                                                                                                                                                                                        |
| GO:0051173~positive regulation of nitrogen compound metabolic process | 0.06056501  | E2F1, HMGB2, DRD1, ADORA2B, STAT5A, ABLIM3, SOX2, ONECUT2, SOX4, TP63, EHF, TNFSF13, ABCA1, SOX9, SHH, IL11, HRH1, BHLHA15, APOE, FOXF2, RARB, TCF4, ALX4, RUNX2, DDAH1, NR1H3, KLF5, IL6, IKZF2, MAML2, IGF2, CREB5, NR4A3, CENPK, MECOM, PPARGC1A, AHR, HDAC5, HNF4A, ETS2, FOXC1, AREG, JAK3, BMP7, NR5A2, SMARCA2 |
| GO:0043005~neuron projection                                          | 0.060972641 | S100A4, CALCR, NRP2, DRD1, CCK, GRIK2, TACR1, SNCA, TP63, KCNJ2, VGF, APOE, ANK3, NEFL, KCNMA1, DNMT3, NOS1, PARK2, BASP1, CAMK2N1, CTNNA2, EPHA7, CHRM3, MAP2, CACNA1G, CA2, ALOX5, LRRK2                                                                                                                            |
| GO:0055088~lipid homeostasis                                          | 0.061007279 | IRS2, MALL, HNF4A, APOE, IGF2, ABCA1, NR5A2                                                                                                                                                                                                                                                                           |
| GO:0043524~negative regulation of neuron apoptosis                    | 0.061007279 | BDNF, GRIK2, ERBB3, BCL2, AGT, SNCA, NEFL                                                                                                                                                                                                                                                                             |
| GO:0001654~eye development                                            | 0.061526725 | RBP4, CRYAB, SOX2, PRKCI, COL5A2, SHH, COL5A1, FOXP2, PVRL3, FOXC1, RARB, BMPR1B, BMP7                                                                                                                                                                                                                                |
| GO:0031646~positive regulation of neurological system process         | 0.062099854 | TF, DRD1, CCL2, GRIK2, TACR1, SNCA                                                                                                                                                                                                                                                                                    |
| GO:0042475~odontogenesis of dentine-containing tooth                  | 0.062099854 | TP63, FOXC1, CA2, LHX8, BMP7, SHH                                                                                                                                                                                                                                                                                     |
| GO:0045471~response to ethanol                                        | 0.062322351 | UGT1A6, RBP4, CCL2, EPS8, APOE, TACR1, BCL2, UGT1A4, UGT1A1, SHH                                                                                                                                                                                                                                                      |
| GO:0048167~regulation of synaptic plasticity                          | 0.062322351 | DRD1, BDNF, GRIK2, APOE, AGT, SNCA, CTNND2, VGF                                                                                                                                                                                                                                                                       |
| GO:0031018~endocrine pancreas development                             | 0.064168793 | IL6, ONECUT1, ONECUT2, PDE3B                                                                                                                                                                                                                                                                                          |
| GO:0035094~response to nicotine                                       | 0.064168793 | HMOX1, TACR1, BCL2, CHRNA7                                                                                                                                                                                                                                                                                            |
| GO:0032870~cellular response to hormone stimulus                      | 0.064403507 | IRS2, DRD1, ADCY1, ERBB3, STAT5A, BAIAP2, PRKCI, PDE3B, IGF2, PHIP, HDAC5, IGFBP1, PIK3R3                                                                                                                                                                                                                             |
| GO:0008361~regulation of cell size                                    | 0.064405892 | FGFR2, CRYAB, TP63, IGF2, SFN, GREM1, NTRK3, RERG, TSPYL2, NUPR1, HNF4A, CDKN2C, BCL2, AGT, TGFB3, CDA, IGFBP1, EMP1                                                                                                                                                                                                  |
| GO:0050840~extracellular matrix binding                               | 0.064514355 | TGFBI, BCAM, NID1, SHH, CYR61                                                                                                                                                                                                                                                                                         |
| GO:0030278~regulation of ossification                                 | 0.065783849 | CALCR, IL6, PDLIM7, BCL2, SOX2, SOX9, BMP7, BMPR1B, RUNX2                                                                                                                                                                                                                                                             |
| GO:0007219~Notch signaling pathway                                    | 0.065896675 | HEY1, DLL4, MAML2, CNTN1, TP63, FOXC1, CFD                                                                                                                                                                                                                                                                            |
| GO:0030837~negative regulation of actin filament polymerization       | 0.066147206 | SCIN, CAPG, VIL1, TMSB4Y, SPTB                                                                                                                                                                                                                                                                                        |
| GO:0003014~renal system process                                       | 0.066147206 | KCNMA1, AGTR1, TACR1, BCL2, AGT                                                                                                                                                                                                                                                                                       |

|                                                                                     |             |                                                                                                                                                                                                                                                                                                                                     |
|-------------------------------------------------------------------------------------|-------------|-------------------------------------------------------------------------------------------------------------------------------------------------------------------------------------------------------------------------------------------------------------------------------------------------------------------------------------|
| GO:0019842~vitamin binding                                                          | 0.066666837 | MOCOS, RBP4, DDC, PAM, CRABP1, SPTLC3, EGLN1, SLC19A3, TCN1, TAT, GLDC, FOLR1, P4HA3                                                                                                                                                                                                                                                |
| GO:0042063~gliogenesis                                                              | 0.066679734 | METR1, DRD1, CDKN2C, ERBB3, AGT, NAB1, MMP14, SHH                                                                                                                                                                                                                                                                                   |
| GO:0009582~detection of abiotic stimulus                                            | 0.066679734 | RBP4, PLEKHB1, SLC12A2, LXN, ARRB1, TACR1, SOX2, ABCA4                                                                                                                                                                                                                                                                              |
| GO:0030308~negative regulation of cell growth                                       | 0.06756935  | RERG, TSPYL2, HNF4A, CDKN2C, CRYAB, BCL2, AGT, CDA, TP63, GREM1                                                                                                                                                                                                                                                                     |
| GO:0006767~water-soluble vitamin metabolic process                                  | 0.067892738 | NAMPT, NMNAT2, SLC23A2, FOLR1, SLC19A3, QPRT                                                                                                                                                                                                                                                                                        |
| GO:0008201~heparin binding                                                          | 0.068144523 | FGFR2, CCL2, APOE, RSPO3, TGFBR3, LAMC2, ADAMTS1, BMP7, FGFBP1, COL5A1, CYR61                                                                                                                                                                                                                                                       |
| GO:0010575~positive regulation vascular endothelial growth factor production        | 0.06847201  | ADORA2B, NOX1, IL1A                                                                                                                                                                                                                                                                                                                 |
| GO:0033032~regulation of myeloid cell apoptosis                                     | 0.06847201  | CD44, BCL2, STAT5A                                                                                                                                                                                                                                                                                                                  |
| GO:0002016~regulation of blood volume by renin-angiotensin                          | 0.06847201  | AGTR1, ACE, AGT                                                                                                                                                                                                                                                                                                                     |
| GO:0002052~positive regulation of neuroblast proliferation                          | 0.06847201  | VEGFC, SOX2, SHH                                                                                                                                                                                                                                                                                                                    |
| GO:0009263~deoxyribonucleotide biosynthetic process                                 | 0.06847201  | RRM2, RRM1, AK5                                                                                                                                                                                                                                                                                                                     |
| GO:0003078~regulation of natriuresis                                                | 0.06847201  | AGTR1, TACR1, AGT                                                                                                                                                                                                                                                                                                                   |
| GO:0006111~regulation of gluconeogenesis                                            | 0.06847201  | HNF4A, IGF2, PPARGC1A                                                                                                                                                                                                                                                                                                               |
| GO:0030291~protein serine/threonine kinase inhibitor activity                       | 0.068820534 | CDKN2C, PRKAG2, PKIB, SFN                                                                                                                                                                                                                                                                                                           |
| GO:0034404~nucleobase, nucleoside and nucleotide biosynthetic process               | 0.06894165  | NMNAT2, NAMPT, ADCY1, RP2, PRKAG2, AK5, AMPD3, ADM, ATP2A3, RRM2, RRM1, CDA, QPRT, DPYD, GUCA2B, NT5E, ATP6V0D2                                                                                                                                                                                                                     |
| GO:0034654~nucleobase, nucleoside, nucleotide and nucleic acid biosynthetic process | 0.06894165  | NMNAT2, NAMPT, ADCY1, RP2, PRKAG2, AK5, AMPD3, ADM, ATP2A3, RRM2, RRM1, CDA, QPRT, DPYD, GUCA2B, NT5E, ATP6V0D2                                                                                                                                                                                                                     |
| GO:0045860~positive regulation of protein kinase activity                           | 0.069090171 | ADCY1, PARD3, CCK, ADORA2B, PRKAG2, C5, TNFSF15, BIRC7, IGF2, ZEB2, DGKA, PLCE1, CCND3, GADD45G, ADRA2A, CHRNA7, GADD45B, EGF, FGD4                                                                                                                                                                                                 |
| GO:0031402~sodium ion binding                                                       | 0.069324597 | SLC17A7, FXD2, HCN2, SLC12A2, SLC17A3, SLC23A2, SLC17A1, SLC9A2, SLC4A8, SLC10A7, SLC13A2, SLC4A4                                                                                                                                                                                                                                   |
| GO:0031982~vesicle                                                                  | 0.069951272 | SYT6, ENPEP, VGF, SHH, AP1S3, BDNF, MALL, RAB27B, CFD, NCALD, MMP14, VEGFC, F5, RHCG, PPBP, SERPINF2, CTSD, ADAMTS1, CTSB, LRRK2, VAMP1, CALCR, PAM, TF, CAV2, RAB3B, CXXC4, ABCA1, GPRC5A, ANXA6, FGG, NPTX1, FGB, ENTPD7, TFF3, SLC30A3, EGF, PCSK4, ARHGDI1, SYT11, SYT12, GOLIM4, SYNGR3, SLC17A7, SH3BP4, NTS, FLG, CAPG, BMP7 |
| GO:0005925~focal adhesion                                                           | 0.07021536  | TNS4, DLC1, CAV2, DIXDC1, LIMA1, LIMS2, LAMA3, CD44, LPP, NPY2R, APBB1IP                                                                                                                                                                                                                                                            |
| GO:0046903~secretion                                                                | 0.070486262 | KCNMA1, IL6, ADORA2B, TACR1, PRKCI, SYT6, ABCA1, BDKRB2, VGF, AQP3, RIMS3, KCNN4, BDNF, ACE, LAT2, HMOX1, AGT, SCIN, KCNK5,                                                                                                                                                                                                         |

|                                                                                                         |             |                                                                                                                                                                                                                                                                                                          |
|---------------------------------------------------------------------------------------------------------|-------------|----------------------------------------------------------------------------------------------------------------------------------------------------------------------------------------------------------------------------------------------------------------------------------------------------------|
|                                                                                                         |             | RAPGEF4, CA2, GUCA2B, PCSK4, SCG2                                                                                                                                                                                                                                                                        |
| GO:0010001~glial cell differentiation                                                                   | 0.071008365 | METRN, DRD1, CDKN2C, ERBB3, AGT, NAB1, SHH                                                                                                                                                                                                                                                               |
| GO:0007411~axon guidance                                                                                | 0.071718002 | NRP2, EPHA4, EPHA7, BDNF, ANK3, SEMA3B, ROBO3, UNC5C, BMP7, BMPR1B, SHH                                                                                                                                                                                                                                  |
| GO:0009986~cell surface                                                                                 | 0.071969383 | FGFR2, CAV2, PARD3, TACR1, BCAM, ENPEP, CX3CL1, GREM1, SHH, WISP2, FGG, ACE, CD44, FGB, APOE, GPC6, CD22, KCNMA1, CRYAB, PTPRR, PLAUR, CD274, CNTN1, TGFBR3, AREG, CTSB, SCARA5, SPTB                                                                                                                    |
| GO:0005158~insulin receptor binding                                                                     | 0.072025178 | PHIP, IRS2, DOK5, DOK7, IGF2                                                                                                                                                                                                                                                                             |
| GO:0032272~negative regulation of protein polymerization                                                | 0.073522855 | SCIN, CAPG, VIL1, TMSB4Y, SPTB                                                                                                                                                                                                                                                                           |
| GO:0001937~negative regulation of endothelial cell proliferation                                        | 0.073954731 | CAV2, APOE, TNFSF15, SCG2                                                                                                                                                                                                                                                                                |
| GO:0043242~negative regulation of protein complex disassembly                                           | 0.073974713 | LIMA1, SCIN, MAP2, CAPG, VIL1, SPTB                                                                                                                                                                                                                                                                      |
| GO:0051186~cofactor metabolic process                                                                   | 0.074096621 | GSTA1, MOCOS, NMNAT2, NAMPT, ALDH1L1, NOX1, UGT1A1, GGT5, UGT1A6, GPHN, BAAT, HNF4A, FOLR1, HPX, HMOX1, GPX3, UGT1A4, QPRT, MOCS1                                                                                                                                                                        |
| GO:0043205~fibril                                                                                       | 0.074103452 | FBN1, MUC5AC, MFAP5                                                                                                                                                                                                                                                                                      |
| GO:0008509~anion transmembrane transporter activity                                                     | 0.075896716 | GABRG3, SLC12A2, ABCA1, SLC17A7, APOL1, SLC17A3, SLC17A1, SLC26A9, SLC4A8, SLC13A2, SLC4A4, SLC4A3, ANO9, GABRP                                                                                                                                                                                          |
| GO:0032989~cellular component morphogenesis                                                             | 0.076359297 | S100A4, NRP2, PARD3, CCK, SHROOM3, ONECUT1, ERBB3, ONECUT2, SOX9, SHH, BDNF, ANK3, BCL2, SEMA3B, UNC5C, ROBO3, NEFL, NFATC1, BAIAP2, PRKCI, CTNNA2, EPHA4, KRT19, EPHA7, ADM, TGFBR3, MAP7, BMPR1B, BMP7, SLITRK6                                                                                        |
| GO:0016023~cytoplasmic membrane-bounded vesicle                                                         | 0.076647199 | CALCR, CAV2, TF, PAM, RAB3B, CXXC4, SYT6, ABCA1, VGF, SHH, ANXA6, AP1S3, BDNF, NPTX1, FGG, MALL, FGB, TFF3, SLC30A3, RAB27B, CFD, EGF, PCSK4, ARHGDIB, NCALD, SYT11, GOLIM4, MMP14, SYNGR3, SLC17A7, SH3BP4, VEGFC, PPBP, NTS, F5, FLG, SERPINF2, CAPG, CTSD, CTSB, LRRK2                                |
| GO:0007346~regulation of mitotic cell cycle                                                             | 0.078177379 | CAV2, CDK1, CDC6, STAT5A, KNTC1, ESPL1, IGF2, HNF4A, ZWINT, BCL2, KIF20B, FOXC1, EGF, IL1A                                                                                                                                                                                                               |
| GO:0045935~positive regulation of nucleobase, nucleoside, nucleotide and nucleic acid metabolic process | 0.079073326 | E2F1, HMGB2, DRD1, ADORA2B, STAT5A, ABLIM3, SOX2, ONECUT2, SOX4, TP63, EHF, TNFSF13, ABCA1, SOX9, SHH, IL11, BHLHA15, APOE, FOXF2, RARB, TCF4, ALX4, RUNX2, NR1H3, KLF5, IL6, IKZF2, MAML2, IGF2, CREB5, NR4A3, CENPK, MECOM, PPARGC1A, AHR, HDAC5, HNF4A, ETS2, FOXC1, AREG, JAK3, BMP7, NR5A2, SMARCA2 |
| GO:0051015~actin filament binding                                                                       | 0.079245513 | LIMA1, SCIN, PLS1, MARCKS, SPTB, MYO5C, FGD4                                                                                                                                                                                                                                                             |
| GO:0031988~membrane-bounded vesicle                                                                     | 0.080059061 | CALCR, CAV2, TF, PAM, RAB3B, CXXC4, SYT6, ABCA1, VGF, SHH, ANXA6, AP1S3, BDNF, NPTX1, FGG, MALL, FGB, TFF3, SLC30A3, RAB27B, CFD, EGF, PCSK4, ARHGDIB, NCALD, SYT11, GOLIM4, MMP14, SYNGR3, SLC17A7, SH3BP4, VEGFC, PPBP, NTS, F5, FLG, SERPINF2, CAPG, CTSD, CTSB, BMP7, LRRK2                          |

|                                                                         |             |                                                                                                                                                                                         |
|-------------------------------------------------------------------------|-------------|-----------------------------------------------------------------------------------------------------------------------------------------------------------------------------------------|
| GO:0033189~response to vitamin A                                        | 0.080342919 | MUC1, RBP4, CD44, SOX2, AQP3, SHH                                                                                                                                                       |
| GO:0042594~response to starvation                                       | 0.080342919 | UGT1A6, ADM, UGT1A4, HRK, CTSD, CPS1, PPARGC1A, UGT1A1                                                                                                                                  |
| GO:0006956~complement activation                                        | 0.080342919 | C3, C5, CFH, C4BPB, C4BPA, CFD                                                                                                                                                          |
| GO:0051247~positive regulation of protein metabolic process             | 0.080737646 | DLC1, CDK1, IL6, CCK, PRKAG2, IGF2, PPARGC1A, IL11, AGTR1, VEGFC, CCND3, HPX, APOE, BCL2, AGT, F2, DNMT1, BMP7, LRRK2, NR1H3                                                            |
| GO:0050730~regulation of peptidyl-tyrosine phosphorylation              | 0.080825229 | IL6, CCK, HNF4A, HPX, AGT, IGF2, EGF, IL11                                                                                                                                              |
| GO:0032271~regulation of protein polymerization                         | 0.080825229 | CAV2, CDC42EP2, TPPP, SCIN, CAPG, VIL1, TMSB4Y, SPTB                                                                                                                                    |
| GO:0009628~response to abiotic stimulus                                 | 0.081253493 | RBP4, DRD1, CCL2, LXN, TACR1, SOX2, BDKRB2, ABCA4, VGF, PLEKHB1, STAC, BCL2, AGT, KCNMA1, NOS1, SLC12A2, CRYAB, NOX1, MMP14, FOXP2, THBD, DIO2, ADM, ARRB1, SCARA3, CA2, COL1A1, SCARA5 |
| GO:0043467~regulation of generation of precursor metabolites and energy | 0.081296124 | IRS2, PPP1R3C, PRKAG2, IGF2, DYRK2                                                                                                                                                      |
| GO:0006732~coenzyme metabolic process                                   | 0.081353349 | GSTA1, MOCOS, NMNAT2, NAMPT, ALDH1L1, NOX1, GGT5, GPHN, BAAT, HNF4A, FOLR1, GPX3, QPRT, MOCS1                                                                                           |
| GO:0031644~regulation of neurological system process                    | 0.081353349 | TF, DRD1, CCL2, CCK, GRIK2, TACR1, SNCA, CTNND2, PARK2, VGF, BDNF, APOE, BCHE, AGT                                                                                                      |
| GO:0008227~amine receptor activity                                      | 0.081517675 | DRD1, HRH1, CHRM3, ADRA2A, HTR1D, ADRA1D                                                                                                                                                |
| GO:0012502~induction of programmed cell death                           | 0.082040769 | DLC1, GRIK2, TP63, TNFSF14, TNFSF13, CD70, SFN, MCF2L, BOK, CDKN2C, APOE, HMOX1, TGM2, TNFRSF19, DYRK2, FGD4, NET1, COL4A3, HRK, SLAMF7, TNFSF10, RASGRF2, NUPR1, MUC5AC, PRODH         |
| GO:0003012~muscle system process                                        | 0.082063965 | KCNMA1, HCN2, DRD1, ADORA2B, CRYAB, TACR1, BDKRB2, VIPR1, HDAC5, CHRM3, HMOX1, AGT, CACNA1G, MB, DTNA                                                                                   |
| GO:0019207~kinase regulator activity                                    | 0.082109869 | CDKN2C, ERBB3, PRKAG2, RAPGEF4, PKIB, SFN, PIK3R3, EGF, CAMK2N1, RHOH                                                                                                                   |
| GO:0030802~regulation of cyclic nucleotide biosynthetic process         | 0.082900181 | CALCR, S1PR3, ADCY1, DRD1, ADORA2B, APOE, NPY2R, ADRA2A, ABCA1, NPR3, GUCA2B                                                                                                            |
| GO:0030808~regulation of nucleotide biosynthetic process                | 0.082900181 | CALCR, S1PR3, ADCY1, DRD1, ADORA2B, APOE, NPY2R, ADRA2A, ABCA1, NPR3, GUCA2B                                                                                                            |
| GO:0005911~cell-cell junction                                           | 0.083902321 | F11R, CGNL1, MAGI3, PARD3, SHROOM3, CLDN4, CALB2, GJB1, CTNNA2, GJB2, DSG2, PKP2, PVRL3, DSC2, TJP3, ADD3, TJP2                                                                         |
| GO:0035272~exocrine system development                                  | 0.084356818 | SOX4, FOXC1, BMP7, SHH                                                                                                                                                                  |
| GO:0051402~neuron apoptosis                                             | 0.084356818 | GRIK2, ERBB3, BCL2, TP63                                                                                                                                                                |
| GO:0008206~bile acid metabolic process                                  | 0.084356818 | ACOX2, BAAT, CYP39A1, NR5A2                                                                                                                                                             |
| GO:0031069~hair follicle morphogenesis                                  | 0.084356818 | FOXQ1, BCL2, TP63, SHH                                                                                                                                                                  |
| GO:0001963~synaptic transmission, dopaminergic                          | 0.084891816 | DRD1, SNCA, PARK2                                                                                                                                                                       |
| GO:0006599~phosphagen metabolic process                                 | 0.084891816 | GATM, STAT5A, CKB                                                                                                                                                                       |
| GO:0030321~transepithelial chloride transport                           | 0.084891816 | CAV2, P2RY6, SLC12A2                                                                                                                                                                    |
| GO:0006600~creatine metabolic process                                   | 0.084891816 | GATM, STAT5A, CKB                                                                                                                                                                       |
| GO:0044062~regulation of excretion                                      | 0.084891816 | AGTR1, TACR1, AGT                                                                                                                                                                       |

|                                                                                  |             |                                                                                                                                                                                                          |
|----------------------------------------------------------------------------------|-------------|----------------------------------------------------------------------------------------------------------------------------------------------------------------------------------------------------------|
| GO:0019934~cGMP-mediated signaling                                               | 0.084891816 | APOE, AGT, PDE9A                                                                                                                                                                                         |
| GO:0051145~smooth muscle cell differentiation                                    | 0.084891816 | WNT4, AGT, TBX18                                                                                                                                                                                         |
| GO:0043537~negative regulation of blood vessel endothelial cell migration        | 0.084891816 | HDAC5, APOE, DLL4                                                                                                                                                                                        |
| GO:0033002~muscle cell proliferation                                             | 0.084891816 | AGT, TGFBR3, FOXC1                                                                                                                                                                                       |
| GO:0007164~establishment of tissue polarity                                      | 0.084891816 | HNF4A, FOXF2, TP63                                                                                                                                                                                       |
| GO:0009125~nucleoside monophosphate catabolic process                            | 0.084891816 | PDE3B, NT5E, AMPD3                                                                                                                                                                                       |
| GO:0009435~NAD biosynthetic process                                              | 0.084891816 | NAMPT, NMNAT2, QPRT                                                                                                                                                                                      |
| GO:0060004~reflex                                                                | 0.084891816 | KCNMA1, NR4A3, FOXP2                                                                                                                                                                                     |
| GO:0046649~lymphocyte activation                                                 | 0.085155552 | EXO1, ONECUT1, STAT5A, SOX4, TNFSF14, IGF2, SLAMF7, IL15, IL11, HDAC5, LAT2, CCND3, BCL2, PLCG2, HELLS, RHOH, KIF13B                                                                                     |
| GO:0048592~eye morphogenesis                                                     | 0.085897295 | RBP4, PVRL3, SOX2, PRKCI, RARB, BMP7, COL5A2, COL5A1                                                                                                                                                     |
| GO:0005924~cell-substrate adherens junction                                      | 0.08590642  | TNS4, DLC1, CAV2, DIXDC1, LIMA1, LIMS2, LAMA3, CD44, LPP, NPY2R, APBB1IP                                                                                                                                 |
| GO:0045202~synapse                                                               | 0.086234505 | RAB3B, ERBB3, GRIK2, SYT6, RIMS3, GPHN, ANK3, RASGRP2, CHRNA7, SLC30A3, GABRP, DTNA, GRID1, KCNMA1, DNMT3, GABRG3, SYT11, SYT12, CAMK2N1, SYNGR3, SLC17A7, EPHA7, CDH15, EPS8, CHRM3, DOK7, LRRK2, VAMP1 |
| GO:0016054~organic acid catabolic process                                        | 0.08685165  | FRRS1, ACOX2, CYP39A1, NOS1, PRODH2, ASRGL1, TAT, DDAH1, MOXD1, PRODH, GLDC                                                                                                                              |
| GO:0046395~carboxylic acid catabolic process                                     | 0.08685165  | FRRS1, ACOX2, CYP39A1, NOS1, PRODH2, ASRGL1, TAT, DDAH1, MOXD1, PRODH, GLDC                                                                                                                              |
| GO:0002541~activation of plasma proteins involved in acute inflammatory response | 0.086993681 | C3, C5, CFH, C4BPB, C4BPA, CFD                                                                                                                                                                           |
| GO:0042633~hair cycle                                                            | 0.086993681 | MPZL3, FOXQ1, BCL2, TP63, SOX9, SHH                                                                                                                                                                      |
| GO:0042303~molting cycle                                                         | 0.086993681 | MPZL3, FOXQ1, BCL2, TP63, SOX9, SHH                                                                                                                                                                      |
| GO:0045667~regulation of osteoblast differentiation                              | 0.086993681 | IL6, PDLIM7, SOX2, BMP7, BMPR1B, RUNX2                                                                                                                                                                   |
| GO:0030031~cell projection assembly                                              | 0.087532136 | KLF5, DNMT3, MYO1A, ONECUT1, BAIAP2, CAPG, ONECUT2, ITGB4, FGD4                                                                                                                                          |
| GO:0010638~positive regulation of organelle organization                         | 0.087532136 | CAV2, CDC42EP2, TACR1, DNMT1, IGF2, ESPL1, EGF, PPARGC1A, IL1A                                                                                                                                           |
| GO:0009612~response to mechanical stimulus                                       | 0.08766848  | CCL2, SLC12A2, TACR1, SOX2, COL1A1, MMP14, FOXP2                                                                                                                                                         |
| GO:0009408~response to heat                                                      | 0.08766848  | NOS1, CCL2, STAC, CRYAB, TACR1, BCL2, SCARA5                                                                                                                                                             |
| GO:0050728~negative regulation of inflammatory response                          | 0.089457027 | GPX2, APOE, CHRNA7, IGF2, NT5E                                                                                                                                                                           |
| GO:0002455~humoral immune response mediated by circulating immunoglobulin        | 0.089457027 | EXO1, C3, C5, C4BPB, C4BPA                                                                                                                                                                               |
| GO:0033674~positive regulation of kinase activity                                | 0.089495236 | ADCY1, PARD3, CCK, ADORA2B, PRKAG2, C5, TNFSF15, BIRC7, IGF2, ZEB2, DGKA, PLCE1, CCND3, GADD45G, ADRA2A, CHRNA7, GADD45B, EGF, FGD4                                                                      |
| GO:0005529~sugar binding                                                         | 0.090079526 | KLRC2, GALNT1, ATRNL1, GALNT7, GALNT5, LGALS9C, LGALS2, GALNT4, MRC2, LGALS9B, PKD1L2, LPHN2, ZG16B, LPHN3, CD22, PLA2R1, GALNT9                                                                         |

|                                                               |             |                                                                                                                                                                                                                                                                                 |
|---------------------------------------------------------------|-------------|---------------------------------------------------------------------------------------------------------------------------------------------------------------------------------------------------------------------------------------------------------------------------------|
| GO:0002020~protease binding                                   | 0.090264596 | SERPINF2, BCL2, SERPINE1, BDKRB2                                                                                                                                                                                                                                                |
| GO:0007229~integrin-mediated signaling pathway                | 0.091146572 | ADAM11, ADAM23, ITGB8, ITGB4, ITGA11, ADAMTS1, CEACAM1, ITGBL1                                                                                                                                                                                                                  |
| GO:0009165~nucleotide biosynthetic process                    | 0.091504978 | NMNAT2, NAMPT, ADCY1, RP2, PRKAG2, AK5, AMPD3, ADM, ATP2A3, RRM2, RRM1, QPRT, DPYD, GUCA2B, NT5E, ATP6V0D2                                                                                                                                                                      |
| GO:0030934~anchoring collagen                                 | 0.09172363  | COL14A1, COL7A1, COL12A1                                                                                                                                                                                                                                                        |
| GO:0070661~leukocyte proliferation                            | 0.093922542 | ACE, CCND3, BCL2, TNFSF14, IL15, HELLS                                                                                                                                                                                                                                          |
| GO:0032943~mononuclear cell proliferation                     | 0.093922542 | ACE, CCND3, BCL2, TNFSF14, IL15, HELLS                                                                                                                                                                                                                                          |
| GO:0044087~regulation of cellular component biogenesis        | 0.094265439 | DLC1, CAV2, CCK, TACR1, VIL1, MMP14, AHR, CDC42EP2, TPPP, CAPG, SCIN, TMSB4Y, SPTB                                                                                                                                                                                              |
| GO:0010876~lipid localization                                 | 0.09486806  | RBP4, STAT5A, SORL1, APOC1, ABCA1, BDKRB2, ABCA4, APOL2, KCNN4, ACE, APOL1, PLIN2, APOE, OSBPL10                                                                                                                                                                                |
| GO:0030799~regulation of cyclic nucleotide metabolic process  | 0.095090855 | CALCR, S1PR3, ADCY1, DRD1, ADORA2B, APOE, NPY2R, ADRA2A, ABCA1, NPR3, GUCA2B                                                                                                                                                                                                    |
| GO:0034367~macromolecular complex remodeling                  | 0.095341532 | AGTR1, APOE, AGT, APOC1                                                                                                                                                                                                                                                         |
| GO:0006044~N-acetylglucosamine metabolic process              | 0.095341532 | UAP1, RENBP, LARGE, CHST2                                                                                                                                                                                                                                                       |
| GO:0002685~regulation of leukocyte migration                  | 0.095341532 | IL6, HMOX1, F7, GREM1                                                                                                                                                                                                                                                           |
| GO:0034368~protein-lipid complex remodeling                   | 0.095341532 | AGTR1, APOE, AGT, APOC1                                                                                                                                                                                                                                                         |
| GO:0034369~plasma lipoprotein particle remodeling             | 0.095341532 | AGTR1, APOE, AGT, APOC1                                                                                                                                                                                                                                                         |
| GO:0060349~bone morphogenesis                                 | 0.095341532 | NAB1, COL1A1, SOX9, RUNX2                                                                                                                                                                                                                                                       |
| GO:0006041~glucosamine metabolic process                      | 0.095341532 | UAP1, RENBP, LARGE, CHST2                                                                                                                                                                                                                                                       |
| GO:0019205~nucleobase, nucleoside, nucleotide kinase activity | 0.095629658 | MAGI3, RP2, DLG3, AK5, TJP2, TK1                                                                                                                                                                                                                                                |
| GO:0043176~amine binding                                      | 0.095907272 | DRD1, NOS1, CHRM3, BCHE, FOLR1, APOC1, CHRNA7, SLC19A3, HTR1D, TAT, DDAH1                                                                                                                                                                                                       |
| GO:0045792~negative regulation of cell size                   | 0.096613842 | RERG, TSPYL2, HNF4A, CDKN2C, CRYAB, BCL2, AGT, CDA, TP63, GREM1                                                                                                                                                                                                                 |
| GO:0044093~positive regulation of molecular function          | 0.097039808 | DLC1, CALCR, PARD3, DRD1, ADCY1, CCK, ADORA2B, TACR1, C5, PRKAG2, TNFSF15, ZEB2, SHH, DGKA, AGTR1, P2RY6, HRH1, APOE, BCL2, AGT, TGM2, ADRA2A, CHRNA7, EGF, FGD4, NR1H3, COL4A3, CDK1, IL6, BIRC7, IGF2, NPR3, SYNGR3, HDAC5, PLCE1, CCND3, GADD45G, PLCG2, F2, TGFBR3, GADD45B |
| GO:0015296~anion:cation symporter activity                    | 0.097057789 | SLC17A7, SLC12A2, SLC17A3, SLC13A2, SLC4A4                                                                                                                                                                                                                                      |
| GO:0042246~tissue regeneration                                | 0.097994257 | GATM, SERPINE1, IGFBP1, TM4SF4, PLAUR                                                                                                                                                                                                                                           |
| GO:0004620~phospholipase activity                             | 0.099322882 | PLCL2, PLCE1, PLA2G16, PLCB4, CHRM3, HMOX1, PLCG2, PLCH1, BDKRB2                                                                                                                                                                                                                |
| GO:0016331~morphogenesis of embryonic epithelium              | 0.099862138 | DLC1, VEGFC, WNT4, SHROOM3, ZEB2, TBX18, SHH                                                                                                                                                                                                                                    |



Table S9. Genes positively regulated by EHF in Calu-3 and A549 cells. These transcripts showed a significant decrease in expression in EHF-depleted Calu-3 cells and an increase in expression in EHF-overexpressing A549 clones.

---

ALDH3A1  
AQP3  
AREG  
ARHGDIB  
ARL5B  
BACH1  
BASP1  
BCAS1  
BDNF  
BHLHA15  
BPIFB1  
CCAT1  
CDC37L1  
CHST2  
CMTM4  
CPNE8  
CXCL5  
CYP24A1  
DSC2  
E2F7  
EHF  
ELK3  
FA2H  
FAM83A  
FERMT1  
FOXA1  
FRRS1  
GALNT7  
IFI16  
KRAS  
KRT4  
LIN7C  
MIR205HG  
MIR3648  
MSN  
NCEH1  
PADI2  
PIK3R3  
PRSS23  
RNF128

SCEL  
SEC23A  
SEC24D  
SESN3  
SLC39A10  
SLC4A7  
SLCO1B3  
SOX4  
SPDEF  
SPTY2D1  
STK38L  
SYT12  
TJP2  
TNFSF15  
TNS4  
TOB1  
TRIM29  
TSPYL2  
UGDH

Table S10. List of enriched gene pathways from DAVID gene ontology analysis of genes positively regulated by EHF in Calu-3 and A549 cells.

| Term                                                     | P Value     | Genes                                                                                     |
|----------------------------------------------------------|-------------|-------------------------------------------------------------------------------------------|
| GO:0030855~epithelial cell differentiation               | 0.01190634  | FOXA1, EHF, KRT4, SCEL                                                                    |
| GO:0070161~anchoring junction                            | 0.015347644 | TNS4, FERMT1, DSC2, TJP2                                                                  |
| GO:0042127~regulation of cell proliferation              | 0.018073213 | BDNF, KRAS, CXCL5, E2F7, TNFSF15, SOX4, KRT4, TOB1                                        |
| GO:0030054~cell junction                                 | 0.019804694 | TNS4, SYT12, FERMT1, LIN7C, DSC2, TJP2                                                    |
| GO:0016323~basolateral plasma membrane                   | 0.023719142 | TNS4, FERMT1, MSN, AQP3                                                                   |
| GO:0012507~ER to Golgi transport vesicle membrane        | 0.024156786 | SEC23A, SEC24D                                                                            |
| GO:0030127~COPII vesicle coat                            | 0.024156786 | SEC23A, SEC24D                                                                            |
| GO:0005125~cytokine activity                             | 0.029844065 | CXCL5, TNFSF15, AREG, CMTM4                                                               |
| GO:0030528~transcription regulator activity              | 0.031446214 | BACH1, BHLHA15, E2F7, TRIM29, FOXA1, SPDEF, SOX4, EHF, ELK3, IFI16, TOB1                  |
| GO:0030134~ER to Golgi transport vesicle                 | 0.033068193 | SEC23A, SEC24D                                                                            |
| GO:0008285~negative regulation of cell proliferation     | 0.036171566 | BDNF, E2F7, TNFSF15, KRT4, TOB1                                                           |
| GO:0043296~apical junction complex                       | 0.036548015 | LIN7C, DSC2, TJP2                                                                         |
| GO:0016327~apicolateral plasma membrane                  | 0.038588153 | LIN7C, DSC2, TJP2                                                                         |
| GO:0060429~epithelium development                        | 0.044055138 | FOXA1, EHF, KRT4, SCEL                                                                    |
| GO:0003700~transcription factor activity                 | 0.048932898 | BACH1, E2F7, TRIM29, FOXA1, SPDEF, SOX4, EHF, ELK3                                        |
| GO:0033280~response to vitamin D                         | 0.054192433 | CYP24A1, AQP3                                                                             |
| GO:0043565~sequence-specific DNA binding                 | 0.057659769 | BACH1, TSPYL2, FOXA1, SPDEF, EHF, ELK3                                                    |
| GO:0009898~internal side of plasma membrane              | 0.071226533 | KRAS, FERMT1, MSN, TJP2                                                                   |
| GO:0030658~transport vesicle membrane                    | 0.076449226 | SEC23A, SEC24D                                                                            |
| GO:0045666~positive regulation of neuron differentiation | 0.080199987 | BDNF, FOXA1                                                                               |
| GO:0005912~adherens junction                             | 0.080909028 | TNS4, FERMT1, TJP2                                                                        |
| GO:0043232~intracellular non-membrane-bounded organelle  | 0.081345558 | BACH1, FERMT1, IFI16, BASP1, ELK3, SCEL, TNS4, TSPYL2, SLC4A7, MSN, KRT4, STK38L, ARHGDIB |
| GO:0043228~non-membrane-bounded organelle                | 0.081345558 | BACH1, FERMT1, IFI16, BASP1, ELK3, SCEL, TNS4, TSPYL2, SLC4A7, MSN, KRT4, STK38L, ARHGDIB |
| GO:0016564~transcription repressor activity              | 0.096051251 | E2F7, ELK3, IFI16, TOB1                                                                   |

Table S11. Genes negatively regulated by EHF in Calu-3 and A549 cells. These transcripts showed a significant increase in expression in EHF-depleted Calu-3 cells and a significant decrease in expression in EHF-overexpressing A549 clones.

---

ACSL1  
ADAMTS15  
AK5  
C10orf10  
CD22  
CYS1  
DMKN  
EFEMP1  
FGFR2  
FJX1  
FUT1  
GLIPR2  
GPC1  
H1F0  
HSPB1  
ID2  
KCNMA1  
MAP2  
MT2A  
NEFL  
NRTN  
PMP22  
PPP1R14C  
REEP2  
SERPINE1  
SUSD2  
TNNT1  
TYMP  
VAT1

## Supplementary Methods

**ChIP-seq.** ChIP-seq was performed as described previously (1, 2) with modifications. Briefly, cells were cross-linked for 10 min in 1% formaldehyde, neutralized and scraped into lysis buffer (5mM PIPES pH 8.0, 85mM KCL, 0.5% NP-40, 1x Protease Inhibitor Cocktail (Roche)). Nuclear preparation was isolated by centrifugation, lysed in RIPA buffer (1x PBS, 1% NP-40, 0.5% sodium deoxycholate, 0.1% SDS, Protease Inhibitor Cocktail), and sonicated at 40% amplitude with the Cole Palmer Ultrasonic Processor probe sonicator 16 times for 25s each in an ice water bath to produce an average fragment size of 250bp. Sonicated chromatin was incubated with antibody coupled to Protein G beads (Dynabeads) overnight at 4°C. For EHF, 10 million Calu-3 cells and 10µg of antibody were used; for histone modifications, 1.25 million Calu-3 cells and 5µg were used. Magnetic beads were washed 5x with wash buffer (100mM Tris pH 7.5, 500mM LiCl, 1% NP-40, 1% sodium deoxycholate) and once with TE (10mM Tris-HCL pH 7.5, 0.1 mM Na<sub>2</sub>EDTA). Bound DNA was eluted with elution buffer (1% SDS, 0.1M NaHCO<sub>3</sub>) at 65°C. Input library was prepared from chromatin that was not immunoprecipitated. Eluted DNA and input were incubated at 65°C overnight to reverse cross-links. DNA was purified with QIAquick PCR cleanup kit (Qiagen).

Sequencing libraries were prepared as previously described (3) with modifications. DNA ends were blunted using T4 DNA polymerase, Klenow DNA polymerase, and T4 polynucleotide kinase. DNA was then incubated with Klenow exo- to add 5' adenine overhangs. Multiplex adaptors were ligated to the ends and converted to dsDNA using 5 cycles of PCR. DNA was size-selected to contain

fragments between 200 and 300bp and PCR amplified for 5 cycles. DNA was purified with 1.2x AMPureXP beads and analyzed on Bioanalyzer (Agilent). Sequencing was performed on an Illumina Hi-Seq, which generated 14 to 41.7 million reads per samples (Table S10).

Fastq files were aligned to the hg19 version of the human genome using Bowtie (v 1.0.0) (4) with a seed length of 40 and a maximum number of 3 mismatches allowed in the seed. Only unique reads were used. The --best argument was used to ensure that Bowtie kept the alignment in the best stratum. In Homer, tag directories were created from the Bowtie alignment files. Then peaks were called using the Homer FindPeaks command in the factor style (EHF ChIP-seq) or histone style (H3K4Me1 and H3K27ac ChIP-seq) with the chromatin input tag directory as the control. The FDR was calculated using the input sequences assuming that the local density of tags followed a Poisson distribution. Using this distribution, Homer calculates the assumed number of false positives for a given tag threshold. It then sets the tag threshold based on the FDR specified by the user (here 0.01). All other parameters for peak calling were the default settings for the FindPeaks command. To identify high-confidence binding sites for EHF, we intersected the peaks from the replicate experiments using Bedtools, and only selected overlapping peaks present in both. This yielded a final list of 768 high-confidence binding sites. To determine the transcription factor binding motifs that were enriched within EHF ChIP-seq peaks, the findMotifsGenome.pl command in HOMER was used with the hg19 genome build and a 200bp window. HOMER uses a differential discovery algorithm to compare the ChIP-seq peaks with the genome.

Motif enrichment is calculated using the cumulative binomial distributions, and the p-value represents the probability of observing the motif sequences by chance.

Histone modification enrichment and peak annotation were performed using the Homer software `annotatePeaks.pl` command and the high-confidence sites.

Biological processes enriched among annotated genes were identified using DAVID (6).

**RNA-seq.** Total RNA purity and quality was assessed by Nanodrop (Thermo Scientific) and Bioanalyzer (Agilent). RNA libraries were prepared from 2 µg of total RNA from four samples of control and EHF-siRNA transfected cells, using TruSeq™ RNA sample preparation kit as per the manufacturer's protocol (Illumina, San Diego, CA). The libraries were sequenced on Illumina HiSeq2500 machines at the UNC High-Throughput Sequencing Facility for paired-end 2 x 100 base reads using standard protocols. Data in fastq format were mapped to the reference human genome (hg19) with ENSEMBL Release 74 of human genome annotation as transcriptome mapping, using TopHat (v2.0.10) (7). Quantification and differential expression of transcripts from the aligned reads were performed using Cufflinks (v2.1.1) with  $FDR \leq 0.1$  as differential expression threshold. Samples were then normalized and expressed as fragments per kilobase of transcript per million fragments mapped (FPKM). Genes with a fold change  $\geq 1.5$  were considered differentially expressed. Biological processes enriched among differentially expressed genes were identified using DAVID (6).

1. Mortazavi A, Leeper Thompson EC, Garcia ST, Myers RM, & Wold B (2006) Comparative genomics modeling of the NRSF/REST repressor network: from single conserved sites to genome-wide repertoire. *Genome research* 16(10):1208-1221.
2. Johnson DS, Mortazavi A, Myers RM, & Wold B (2007) Genome-wide mapping of in vivo protein-DNA interactions. *Science* 316(5830):1497-1502.
3. Ford E, Nikopoulou C, Kokkalis A, & Thanos D (2014) A method for generating highly multiplexed ChIP-seq libraries. *BMC Research Notes* 7(312).
4. Langmead B, Trapnell C, Pop M, & Salzberg SL (2009) Ultrafast and memory-efficient alignment of short DNA sequences to the human genome. *Genome Biol* 10(3):R25.
5. Heinz S, *et al.* (2010) Simple combinations of lineage-determining transcription factors prime cis-regulatory elements required for macrophage and B cell identities. *Mol Cell* 38(4):576-589.
6. Dennis Jr. G, *et al.* (2003) DAVID: Database for Annotation, Visualization, and Integrated Discovery. *Genome Biology* 4(5):P3.
7. Trapnell C, *et al.* (2012) Differential gene and transcript expression analysis of RNA-seq experiments with TopHat and Cufflinks. *Nature protocols* 7(3):562-578.
